# Supplementary material for: Authigenic formation of Ca–Mg carbonates in the shallow alkaline Lake Neusiedl, Austria
Source: Copernicus journal article supplement (doi:10.5194/bg-17-2085-2020), 2020-04-16
Supplement: Supplementary file 1 [file bg-17-2085-2020-supplement.zip]

Archive with 8 entries (7 files):
- bg-17-2085-2020-supplement-title-page.pdf
- Supplementary data/
- Supplementary data/LN_XRD_Data_XY.xlsx
- Supplementary data/LN_supplementary data.xlsx
- Supplementary data/LN_plot data.xlsx
- Supplementary data/Figure S8.png
- Supplementary data/Sample Codes.xlsx
- Supplementary data/Figure S7.jpg
