# Supplementary material for: Authigenic formation of Ca–Mg carbonates in the shallow alkaline Lake Neusiedl, Austria
Source: Copernicus journal article supplement (doi:10.5194/bg-17-2085-2020), 2020-04-16
Supplement: Supplementary file 1 [file bg-17-2085-2020-supplement.zip › bg-17-2085-2020-supplement-title-page.pdf]

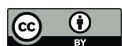

## *Supplement of*

# **Authigenic formation of Ca–Mg carbonates in the shallow alkaline Lake Neusiedl, Austria**

**Dario Fussmann et al.**

*Correspondence to:* Dario Fussmann ([dario.fussmann@uni-goettingen.de](mailto:dario.fussmann@uni-goettingen.de))

- [bg-17-2085-2020-supplement-title-page.pdf](#)
- Supplementary data
  - [Figure S7.jpg](#)
  - [Figure S8.png](#)
  - [LN\\_XRD\\_Data\\_XY.xlsx](#)
  - [LN\\_plot data.xlsx](#)
  - [LN\\_supplementary data.xlsx](#)
  - [Sample Codes.xlsx](#)

The copyright of individual parts of the supplement might differ from the CC BY 4.0 License.
