# Supplementary material for: Authigenic formation of Ca–Mg carbonates in the shallow alkaline Lake Neusiedl, Austria
Source: Copernicus journal article supplement (doi:10.5194/bg-17-2085-2020), 2020-04-16
Supplement: Supplementary file 1 [file bg-17-2085-2020-supplement.zip › Supplementary data/LN_plot data.xlsx]

## Sheet: Table 1 (Fig. 3)
Depth [LN-K04; cm b.s.]	Porosity	Corg:Ntot	Corg [weight %]	Ccarb [weight %]	Stot [weight %]
1	0.724
2.5		9.8049	2.01	7.2	0.12
5	0.6619	9.4017	2.2	7.03	0.125
7.5		9.7143	2.04	7.2	0.125
10	0.6244	9.5794	2.05	7.54	0.129
12.5		9.9541	2.17	7.26	0.122
15	0.6523	9.6891	1.87	7.23	0.121
17.5		10.582	2	7.1	0.148
20	0.6307	11.3372	1.95	6.38	0.152
22.5		11.6022	2.1	5.96	0.184
25	0.6493	12.0253	2.85	5.68	0.24
27.5		12.7148	3.7	5.77	0.238
30	0.6165	13.1803	4.02	5.56	0.284

## Sheet: Table 2 (Fig. 7)
Depth [LN-K04; cm b.s.]	Calcite [weight %]	HMC [weight %]	Protodolomite [weight %]	Muscovite [weight %]	Feldspar [weight %]	Quartz [weight %]	Clay [weight %]
2.5	5.1	33.3	21.7	18.1	6	12	3.6
5	5.7	34.1	18.8	12.9	6.5	13.9	6.3
7.5	5.7	31.9	22.4	21.9	5.6	11.1	4.5
10	5.7	34.4	22.8	17	4.3	10.3	4.4
12.5	7.1	29.8	23.6	13.9	8.2	11.2	6.1
15	5	35.6	19.7	13.2	6.2	13.8	6.2
17.5	5.6	32.5	21	19.8	8	12.2	4.5
20	7.4	26	19.7	18.5	7.1	14.3	4.9
22.5	6.5	24.4	18.8	14.6	9.2	18.3	6.7
25	7.6	21	18.7	19.4	10.9	18	5.6
27.5	8.6	23.7	15.8	17.3	9.9	16.1	7.5
30	7.4	23.7	15.3	21.7	10.6	15.6	6.6
32.5	8.6	21	17.2	22.5	9.7	13.9	6.5

## Sheet: Table 3 (Fig. 8)
Depth [LN-K04; cm b.s.]	HMC [Mg/(Ca+Mg)]	Protodolomite [Mg/(Ca+Mg)]	(HMC+VHMC)/CC	HMC/Protodolomite
2.5	16.65	44.513	10.84	1.5372
5	17.1433	47.4196	9.3413	1.8088
7.5	18.4066	46.5197	9.5596	1.4209
10	18.4533	47.3996	10.0984	1.5075
12.5	17.2799	47.893	7.5422	1.2644
15	15.8466	49.1163	11.1682	1.8066
17.5	15.46	48.8963	9.5777	1.547
20	14.7666	43.6997	6.1752	1.3179
22.5	17.0233	48.6463	6.6861	1.2975
25	18.1433	49.0396	5.2317	1.1242
27.5	17.1899	47.833	4.5994	1.5012
30	16.3933	49.1763	5.2903	1.5537
32.5	20.3666	49.1296	4.465	1.2181

## Sheet: Table 4 (Fig. 9)
Depth [cm b. s.]	TA [meq L-1]	pH	SiO2 [mmol L-1]	Ca2+ [mmol L-1]	Mg2+ [mmol L-1]	Na+ [mmol L-1]	K+ [mmol L-1]	Cl- [mmol L-1]	Eh [mV]	NH4+ [mmol L-1]	NO2- [µmol L-1]	Fe2+ [µmol L-1]	Mn2+ [µmol L-1]	PO43- [mmol L-1]	∑H2S [mmol L-1]	SO42- [mmol L-1]	Depth [cm b. s.; NR-17]	CH4 [µmol L-1]	DIC [mmol L-1]
-5	11.1822	9.02	3.9534	0.3299	5.1326	14.3499	0.8712	7.0765		0.0038571	0.0498	0.1844	0.0145	0.0006513	1.9619	3.9534	1	64.1193
-1	11.1778	8.67	3.9465	0.3303	5.0896	14.3408	0.8666	7.0837	423	0.0256	0.1287	0.2421	0.0169	0.00076291	0.035125	3.9465	5	14.739	11.7083
2	11.25	7.309	3.8804	0.415	4.9936	14.2967	0.903	7.0937	-234.3	0.0272	0.856	1.3534	0.0182	0.0025955	0.0030031	3.8804	10	157.325	13.5917
4.5	11.8125	7.366	3.6047	0.4832	4.884	14.2257	0.9084	7.1265	-219.6	0.1289	0.2166	0.5042	0.043	0.006786	0.0252	3.6047	15	210.669	15.3667
7	12.5625	7.455	2.8018	0.5753	4.46	14.1798	0.9204	7.1657		0.2161	0.1938	0.3531	0.037	0.0117	0.25	2.8018	20	227.794	14.9417
10	14.0625	7.492	1.8434	0.5853	4.246	14.3179	0.9112	7.236	-214.2	0.3251	0	0.2224	0.0362	0.0144	0.8865	1.8434	25		17.325
13	14.8125	7.51	1.4525	0.537	4.0577	14.6793	0.9348	7.3676		0.3636	0	0.4674	0.0406	0.0138	0.9277	1.4525	30		18.0083
16	15.75	7.544	1.3438	0.5337	4.0733	15.3366	0.9535	7.466	-214.1	0.3696	0	0.2529	0.0692	0.0151	0.829	1.3438
19	16	7.587	1.539	0.5073	4.0178	16.1461	0.9609	7.6978		0.3664	0	0.2764	0.0682	0.0154	0.8532	1.539
22	16.125	7.596	1.7572	0.4859	3.9445	17.0192	1.0064	7.9676	-186.4	0.3644	0	0.1715	0.0678	0.0141	0.7177	1.7572
25	16.3125	7.597	1.9523	0.4589	3.8351	18.429	1.076	8.3133	-109.3	0.3649	0	0.2468	0.0405	0.0136	0.4994	1.9523
27.5	16.75	7.602	2.4132	0.4785	3.9856	19.9191	1.0614	8.7785	-121.1	0.3644	0	0.3136	0.0743	0.0134	0.8794	2.4132

## Sheet: Table 5 (Fig. 10)
Depth [cm b. s.]	SIAragonite [log IAP/KT]	SICalcite [log IAP/KT]	SIProtodolomite [log IAP/KT]	SIDolomite [log IAP/KT]
-5	0.95	1.09	2.92	3.49
-1	0.7	0.84	2.4	2.97
2	-0.46	-0.32	-0.05	0.52
4.5	-0.33	-0.18	0.15	0.72
7	-0.13	0.02	0.42	0.99
10	-0.06	0.09	0.54	1.11
13	-0.06	0.09	0.55	1.12
16	-0.01	0.13	0.65	1.23
19	0.02	0.16	0.73	1.3
22	0.01	0.16	0.73	1.3
25	-0.01	0.14	0.71	1.28
27.5	0.01	0.16	0.74	1.31
	0

## Sheet: Table 6 (Fig. 11)
Depth	Acidobacteria	Actinobacteria	Bacteroidetes	Chloroflexi	Cyanobacteria	Firmicutes-Clostridia	Firmicutes-Erysipelotrichia	Gemmatimonadetes	Nitrospirae	Proteobacteria-Alpha	Proteobacteria-Delta	Proteobacteria-Gamma	Spirochaetes	Verrucomicrobia	rare taxa
[LN-K01; cm]	[abundance %]
10	0.7872	42.0182	8.3024	2.5484	18739	0.1163	1.7154	0.9926	0.2896	21.7474	0.6708	9.6242	0.047	0.4208	8.8457
0	10.0446	6.9051	6.7098	15.0933	23046	0.4538	0.00095745	4.5125	1.8354	2.228	6.075	17.3586	0.3016	2.8618	23.3149
-5	8.0654	4.0257	1.5196	10.0201	0.2435	0.8536	0	2.7496	2.625	1.4133	9.6899	36.5544	0.4716	0.4758	21.2926
-10	9.6628	3.4376	1.4764	12.8716	0.1385	1.0406	0	2.6322	3.4489	1.2726	10.0727	30.4107	0.538	0.4833	22.5142
-15	9.8579	4.357	0.9061	15.2679	0.1183	1.1439	0	1.0136	2.2436	1.1953	10.0718	29.8187	0.5092	0.4889	23.0077
-20	11.3903	3.4325	1.0039	24.2944	0.0476	1.3113	0.0012198	1.3442	2.6213	1.6028	11.5757	17.6844	0.8599	0.3781	22.4525
-25	17.4774	3.983	0.984	35.4347	0.0121	0.7954	0	0.2475	1.0882	1.8217	5.3685	14.0755	0.5992	0.0090556	18.1037
-30	14.0527	1.8109	2.0979	46.8505	0.0067099	0.3154	0	0.2378	1.2011	1.2197	8.4649	6.3319	2.7138	0.0701	14.6267
-35	14.4214	5.5379	2.3891	38.4326	0.0036209	0.7539	0	0.3121	1.5244	1.0703	9.434	6.8131	3.0894	0.0804	16.1378
Depth	Acidobacteria	Actinobacteria	Bacteroidetes	Chloroflexi	Cyanobacteria	Firmicutes-Clostridia	Firmicutes-Erysipelotrichia	Gemmatimonadetes	Nitrospirae	Proteobacteria-Alpha	Proteobacteria-Delta	Proteobacteria-Gamma	Spirochaetes	Verrucomicrobia	rare taxa
[LN-K02; cm]	[abundance %]
10	0.7767	46.2383	7.0425	3.0781	1.7625	0.1022	2.1883	0.992	0.2194	19.7417	0.6683	7.9234	0.0436	0.2902	8.933
0	8.3263	7.4718	6.2307	17.7846	2.0122	0.2584	0.0011665	4.4973	2.1399	1.9649	5.3086	14.9297	0.4123	2.6998	25.9622
-5	9.3365	6.54	4.9178	16.4973	0.323	0.5884	0	4.1897	2.2184	2.4332	9.1612	18.0428	0.6523	0.9398	24.1595
-10	8.6385	5.425	4.0383	16.0149	0.8683	0.5949	0	3.5576	1.9033	2.1883	10.1016	20.1018	0.5694	0.9152	25.0831
-15	8.9803	5.6852	2.0271	12.79	0.8671	0.5497	0	2.5588	2.5265	1.7997	11.3163	21.631	0.3971	0.7382	28.1331
-17.5	10.8659	2.0056	0.0973	10.2665	1.563	0.0596	0	0.1507	0.3861	0.7187	2.5203	50.5634	0.1099	0.0345	20.6585
-20	13.4551	2.0288	1.8119	46.2524	0.0848	0.4074	0	0.3066	1.4963	1.3968	8.3149	9.9725	1.0846	0.0271	13.3606
-22.5	11.2472	2.2931	3.2767	45.6349	0.6004	0.4365	0	0.325	1.4887	1.8537	9.1571	6.1359	2.3274	0.0257	15.1977
-25	11.0919	1.6578	2.8407	48.7905	0.0163	0.6414	0	0.2678	1.0897	1.3937	9.6257	5.9151	3.883	0.2086	12.578
-27.5	11.8875	3.8483	2.2567	44.4749	0.1275	0.697	0	0.3091	1.2205	1.2725	9.1562	6.6004	2.1779	0.1255	15.846
-30	9.3117	2.6616	1.6645	36.9043	0.2327	0.6949	0	0.3491	0.9583	1.1038	8.4584	22.8317	1.7082	0.084	13.0367
-32.5	8.395	5.5442	1.0238	28.0517	0.6143	0.4851	0	0.1638	0	0.6993	4.7346	35.3504	0.9198	0.0473	12.7138

## Sheet: Table 7 (Fig. 13)
Depth	aerobic	anaerobic	facultative	unknown
[LN-K01; cm]	[abundance %]
10	65.7198	7.8284	17.9712	8.4806
0	18.4912	28.7848	29.635	23.0889
-5	8.2095	57.0005	15.8481	18.9419
-10	6.8647	58.7989	14.5703	19.7661
-15	7.0524	63.6632	9.5112	19.7731
-20	6.8295	57.598	15.9767	19.5958
-25	7.0951	70.4952	6.2001	16.2096
-30	3.6733	76.0339	7.8401	12.4528
-35	4.3524	74.0575	8.5548	13.0354
Depth	aerobic	anaerobic	facultative	unknown
[LN-K02; cm]	[abundance %]
10	67.4304	9.0965	14.882	8.591
0	16.5563	30.7972	27.5807	25.0658
-5	13.5064	36.8083	27.4259	22.2593
-10	12.3959	39.6928	25.3976	22.5137
-15	12.1768	41.4291	21.5258	24.8683
-17.5	4.573	62.1418	14.2463	19.039
-20	3.879	71.8424	12.0548	12.2238
-22.5	4.6119	72.3886	9.0532	13.9463
-25	3.9939	77.584	6.8649	11.5572
-27.5	3.8343	76.7063	5.3619	14.0974
-30	3.3582	70.7542	15.3315	10.5561
-32.5	3.6856	65.226	21.6255	9.4629
