# Supplementary material for: Authigenic formation of Ca–Mg carbonates in the shallow alkaline Lake Neusiedl, Austria
Source: Copernicus journal article supplement (doi:10.5194/bg-17-2085-2020), 2020-04-16
Supplement: Supplementary file 1 [file bg-17-2085-2020-supplement.zip › Supplementary data/LN_supplementary data.xlsx]

## Sheet: Table S1
Sample ID		Date	Depth	EC	pH	TpH	Eh	pe	O2	Ca	Mg	Na	K	Li	Rb	Sr	Ba	Fe	Mn	Si	B	Total Alkalinity	Cl	SO4	NO3	F	Br	PO4	NO2	NH4	H2S-S		pCO2	log pCO2	SI	SI	SI	SI	SI	SI	SI	SI
				25°C																															Calcite	Aragonite	Dolomite (d)	Dolomite	Calcite	Aragonite	Dolomite (d)	Dolomite
		Sampling	cm	µS cm-1		°C	mV		mmol L-1	mmol L-1	mmol L-1	mmol L-1	mmol L-1	mmol L-1	mmol L-1	mmol L-1	mmol L-1	mmol L-1	mmol L-1	mmol L-1	mmol L-1	meq L-1	mmol L-1	mmol L-1	mmol L-1	mmol L-1	mmol L-1	mmol L-1	mmol L-1	mmol L-1	mmol L-1		µatm	ppCO2	log IAP/KT	log IAP/KT	IAP/KT	log IAP/KT	IAP/KT	IAP/KT	IAP/KT	IAP/KT
Lake Neusiedl			below w.l.
LNS-01	Lake_10 cm	2017-08-24	20	2.35	9.02	23.3	n.a.	n.a.	0.288	0.33	5.13	14.3	0.871	0.024	8.6e-05	0.00487	0.000139	0.00018	1.5e-05	0.192	0.0429	11.2	7.08	3.95	<0.0015	0.017	0.00699	0.00065	5e-05	0.004	n.a.		427	-3.37	1.07	0.92	2.92	3.46	11.75	8.32	831.76	2884.03
Porewaters			below s.s.
K3-00	K3_Supernatant	2017-08-24	0	2.37	8.67	22.6	423	7.22	0.169	0.33	5.09	14.3	0.867	0.024	8e-05	0.00464	0.000134	0.00024	1.7e-05	0.242	0.0431	11.2	7.08	3.95	<0.0015	0.0171	0.00698	0.00076	0.00013	0.026	<0.001		1096	-2.96	0.81	0.66	2.4	2.92	6.46	4.57	251.19	831.76
K3-01	Core_K3_01	2017-08-24	2	n.a.	7.31	24.5	-234	-4	n.a.	0.415	4.99	14.3	0.903	0.024	9.4e-05	0.00508	0.000185	0.00135	1.8e-05	0.506	0.0435	11.2	7.09	3.88	<0.0015	0.0167	0.00704	0.0026	0.00086	0.027	0.003		29512	-1.53	-0.33	-0.47	-0.05	0.54	0.47	0.34	0.89	3.47
K3-02	Core_K3_02	2017-08-24	4.5	n.a.	7.37	24.7	-220	-3.75	n.a.	0.483	4.88	14.2	0.908	0.024	9.7e-05	0.0054	0.000219	0.0005	4.3e-05	0.539	0.0471	11.6	7.13	3.6	<0.0015	0.0165	0.00701	0.00679	0.00022	0.129	0.025		26915	-1.57	-0.18	-0.33	0.15	0.76	0.66	0.47	1.41	5.75
K3-03	Core_K3_03	2017-08-24	7	n.a.	7.46	24.5	n.a.	n.a.	n.a.	0.575	4.46	14.2	0.92	0.024	9.7e-05	0.0054	0.000237	0.00035	3.7e-05	0.664	0.0494	12.6	7.17	2.8	<0.0015	0.0161	0.00724	0.01167	0.00019	0.216	0.25		23442	-1.63	0.02	-0.13	0.42	1.04	1.05	0.74	2.63	10.96
K3-04	Core_K3_04	2017-08-24	10	n.a.	7.49	24.3	-214	-3.65	n.a.	0.585	4.25	14.3	0.911	0.024	9.6e-05	0.00559	0.000242	0.00022	3.6e-05	0.699	0.0547	14.3	7.24	1.84	<0.0015	0.0157	0.00767	0.01438	<0.00001	0.325	0.886		23442	-1.63	0.11	-0.04	0.54	1.2	1.29	0.91	3.47	15.85
K3-05	Core_K3_05	2017-08-24	13	n.a.	7.51	23.9	n.a.	n.a.	n.a.	0.537	4.06	14.7	0.935	0.024	9.8e-05	0.00512	0.000237	0.00047	4.1e-05	0.615	0.0586	14.9	7.37	1.45	<0.0015	0.0159	0.00818	0.01377	<0.00001	0.364	0.928		23442	-1.63	0.11	-0.04	0.55	1.22	1.29	0.91	3.55	16.6
K3-06	Core_K3_06	2017-08-24	16	n.a.	7.54	23.7	-214	-3.65	n.a.	0.534	4.07	15.3	0.953	0.025	9.7e-05	0.0055	0.000259	0.00025	6.9e-05	0.794	0.0663	15.8	7.47	1.34	<0.0015	0.0156	0.00877	0.01515	<0.00001	0.37	0.829		22909	-1.64	0.16	0.02	0.65	1.32	1.45	1.05	4.47	20.89
K3-07	Core_K3_07	2017-08-24	19	n.a.	7.59	23.6	n.a.	n.a.	n.a.	0.507	4.02	16.1	0.961	0.026	9.4e-05	0.00545	0.000256	0.00028	6.8e-05	0.838	0.0709	16	7.7	1.54	<0.0015	0.0159	0.00928	0.01541	<0.00001	0.366	0.853		20893	-1.68	0.18	0.03	0.73	1.37	1.51	1.07	5.37	23.44
K3-08	Core_K3_08	2017-08-24	22	n.a.	7.6	23.6	-186	-3.17	n.a.	0.486	3.94	17	1.006	0.027	9.9e-05	0.00523	0.000243	0.00017	6.8e-05	0.717	0.0773	16.1	7.97	1.76	<0.0015	0.0161	0.00996	0.01415	<0.00001	0.364	0.718		20893	-1.68	0.17	0.02	0.73	1.37	1.48	1.05	5.37	23.44
K3-09	Core_K3_09	2017-08-24	25	n.a.	7.6	23.5	-109	-1.86	n.a.	0.459	3.84	18.4	1.076	0.028	0.000102	0.0048	0.00022	0.00025	4e-05	0.561	0.0951	16.3	8.31	1.95	<0.0015	0.0212	0.01065	0.01364	<0.00001	0.365	0.499		21380	-1.67	0.15	0	0.71	1.33	1.41	1	5.13	21.38
K3-10	Core_K3_10	2017-08-24	27.5	n.a.	7.6	23.1	-121	-2.06	n.a.	0.479	3.99	19.9	1.061	0.028	9.5e-05	0.00501	0.000229	0.00031	7.4e-05	0.521	0.1021	16.8	8.78	2.41	<0.0015	0.0175	0.01123	0.0134	<0.00001	0.364	0.879		20893	-1.68	0.16	0.01	0.74	1.34	1.45	1.02	5.5	21.88
																					0
K1-00	K1_Supernatant	2017-08-24	0	2.34	8.84	26	369	6.22	0.226	0.327	5.12	14.3	0.881	0.024	8.6e-05	0.00474	0.000123	0.00011	7e-06	n.a.	0.0429	11.1	7.08	3.96	<0.0015	0.0179	0.00699	0.00061	6e-05	0.004	<0.001		724	-3.14	0.96	0.82		3.28	9.12	6.61		1905.46
K2-00	K2_Supernatant	2017-08-24	0	2.34	8.86	26.2	352	5.93	0.216	0.325	5.1	14.2	0.872	0.024	8.4e-05	0.00463	0.000136	0.00018	2.2e-05	n.a.	0.0428	11	7.08	3.96	<0.0015	0.0173	0.00698	0.00082	2e-05	0.005	<0.001		676	-3.17	0.97	0.83		3.3	9.33	6.76		1995.26
K4-00	K4_Supernatant	2017-08-24	0	2.37	8.51	22.8	318	5.42	0.114	0.35	5.01	14.4	0.866	0.024	7.8e-05	0.00476	0.000137	0.00028	1.6e-05	0.267	0.0427	11.2	7.1	3.91	<0.0015	0.017	0.00708	0.00106	0.00022	0.044	<0.001		1660	-2.78	0.71	0.56		2.69	5.13	3.63		489.78
K5-00	K5_Supernatant	2017-08-24	0	2.36	8.7	23.2	373	6.35	0.174	0.325	5.11	14.4	0.884	0.024	8.5e-05	0.0047	0.000137	0.00032	1.1e-05	0.212	0.0428	11.2	7.08	3.95	<0.0015	0.0173	0.00697	0.00112	0.00017	0.01	<0.001		1023	-2.99	0.83	0.69		2.99	6.76	4.9		977.24
	n.a. = not analyzed
	w.l. = water level
	s.s. = sediment surface

## Sheet: Table S2
Depth	DIC	CH4	Porosity		Core NR17-18
(cm)	(mmol/l)	(µmol/l)			Sampled 18.8.2017
1		64.12	0.724		P. Meister, C.Haberhauer, S. Gier
5	11.71	14.74	0.662		Ruster Bucht
10	13.59	157.33	0.624
15	15.37	210.67	0.652
20	14.94	227.79	0.631
25	17.33		0.649
30	18.01		0.617
35	19.22		0.569
40	19.29		0.462
45	19.75		0.433
50	20.22		0.427

## Sheet: Table S3
Sample	Depth	total Carbon	organic Carbon	carbonate Carbon	total Nitrogen	total Sulfur	Corg/Ntot	Corg/Stot
	below s.s.	Ctot	Corg	Ccarb	Ntot	Stot
	cm	weight%	weight%	weight%	weight%	weight%
LN-K04-01	2.5	9.21	2.01	7.2	0.205	0.119	9.8	16.9
LN-K04-02	5	9.23	2.2	7.03	0.234	0.12	9.4	18.3
LN-K04-03	7.5	9.24	2.04	7.2	0.21	0.125	9.7	16.3
LN-K04-04	10	9.59	2.05	7.54	0.214	0.125	9.6	16.4
LN-K04-05	12.5	9.43	2.17	7.26	0.218	0.129	10	16.8
LN-K04-06	15	9.1	1.87	7.23	0.193	0.122	9.7	15.3
LN-K04-07	17.5	9.1	2	7.1	0.189	0.121	10.6	16.5
LN-K04-08	20	8.33	1.95	6.38	0.172	0.148	11.3	13.2
LN-K04-09	22.5	8.06	2.1	5.96	0.181	0.152	11.6	13.8
LN-K04-10	25	8.53	2.85	5.68	0.237	0.184	12	15.5
LN-K04-11	27.5	9.47	3.7	5.77	0.291	0.24	12.7	15.4
LN-K04-12	30	9.58	4.02	5.56	0.305	0.238	13.2	16.9
LN-K04-13	32.5	10.41	4.8	5.61	0.361	0.284	13.3	16.9

## Sheet: Table S4
	Depth	Calcite	HMC	Protodolomite	Muscovite	Feldspar	Quartz	Clay
	below s.s.
	cm	weight%	weight%	weight%	weight%	weight%	weight%	weight%
LN-K04-01	2.5	5.1	33.3	21.7	18.1	6	12	3.6
LN-K04-02	5	5.7	34.1	18.8	12.9	6.5	13.9	6.3
LN-K04-03	7.5	5.7	31.9	22.4	21.9	5.6	11.1	4.5
LN-K04-04	10	5.7	34.4	22.8	17	4.3	10.3	4.4
LN-K04-05	12.5	7.1	29.8	23.6	13.9	8.2	11.2	6.1
LN-K04-06	15	5	35.6	19.7	13.2	6.2	13.8	6.2
LN-K04-07	17.5	5.6	32.5	21	19.8	8	12.2	4.5
LN-K04-08	20	7.4	26	19.7	18.5	7.1	14.3	4.9
LN-K04-09	22.5	6.5	24.4	18.8	14.6	9.2	18.3	6.7
LN-K04-10	25	7.6	21	18.7	19.4	10.9	18	5.6
LN-K04-11	27.5	8.6	23.7	15.8	17.3	9.9	16.1	7.5
LN-K04-12	30	7.4	23.7	15.3	21.7	10.6	15.6	6.6
LN-K04-13	32.5	8.6	21	17.2	22.5	9.7	13.9	6.5
	s.s. = sediment surface
	HMC = High Magn. Calcite
	VHMC = Very High Magn. Calcite

## Sheet: Table S5
BACTERIA (oxygen utilisation --> Figure 13 A and B)																						Energy Metabolism	Order	Trophy	Air	Function	oxygenic phototroph	photoheterotroph	anoxygenic phototroph	strict_aer_hetero	microaerophil_facultative	all_aer_hetero	strict anaerobes	all anaerobes	SRB	Sulfur oxidation	fermenter	nitrification	denitrification	N2 fixation	DNRA	Nitrogen pathway	Reference		1-0 [%]	1-1 [%]	1-2 [%]	1-3 [%]	1-4 [%]
Sample Code (Core-increment)	1-0 [%]	1-1 [%]	1-2 [%]	1-3 [%]	1-4 [%]	1-6 [%]	1-8 [%]	1-10 [%]	1-12 [%]	2-0 [%]	2-1 [%]	2-2 [%]	2-3 [%]	2-4 [%]	2-5 [%]	2-6 [%]	2-7 [%]	2-8 [%]	2-9 [%]	2-10 [%]	2-11 [%]		Acetothermia - Acetothermiia - uncultured bacterium	chemoheterotroph (acetogen)	Strict anaerobe	fermentation							7.70079	7.70079			7.70079						Hao 2018		0.0631219	0.565853	1.01727	0.848925	0.326325
Depth	-10	0	5	10	15	20	25	30	35	-10	0	5	10	15	17.5	20	22.5	25	27.5	30	32.5	aerobic heterotrophic respiration (Group A)	Acidobacteria - Acidobacteriia - Solibacterales	chemoheterotroph	aerobe/facultative anaerobe/ microaerophil	fermentation					9.41142	9.41142					9.41142						Dedysh, 2018		0.157186	1.69373	0.355414	0.237602	0.141049
																						fermentation (Group B)	Acidobacteria - Aminicenantia - Aminicenantales	organotroph	facultative anaerobe/strict anaerobe	fermentation								123.035			123.035		123.035			denitrification	Kadnikov, 2019; Sharon 2015		0.0891133	0.904791	3.49257	6.18894	7.26879
aerobic (A+F)	65.7198	18.4912	8.2095	6.8647	7.05244	6.82955	7.0951	3.67327	4.35236	67.4304	16.5563	13.5064	12.3959	12.1768	4.57299	3.87899	4.61191	3.99393	3.83432	3.35817	3.68562	anaerobic heterotrophic respiration, primarily sulphate reduction (Group C)	Acidobacteria - Blastocatellia (Subgroup 4) - 11-24	chemoheterotroph	aerobe/microaerophil	aerobic respiration					5.50941	5.50941											Dedysh, 2018		0.102728	1.57213	0.243472	0.082154	0.010758
anaerobic (B+C+D+E)	7.82836	28.7848	57.0005	58.7989	63.6632	57.598	70.4952	76.0339	74.0575	9.09655	30.7972	36.8083	39.6928	41.4291	62.1418	71.8424	72.3886	77.584	76.7063	70.7542	65.226	heterotrophic respiration, primarily denitrification (Group D)	Acidobacteria - Holophagae - Subgroup 7	chemoheterotroph	anaerobe	fermentation								6.69222			6.69222						Dedysh, 2018		0.0878756	1.21979	0.580696	0.441377	0.0669384
facultative(A+B+G)	17.9712	29.635	15.8481	14.5703	9.51123	15.9767	6.2001	7.8401	8.55481	14.882	27.5807	27.4259	25.3976	21.5258	14.2463	12.0548	9.05322	6.86492	5.3619	15.3315	21.6255	anaerobic phototrophic respiration, primarily sulfur oxidation (Group E)	Acidobacteria - Subgroup 17 - uncultured Acidobacteria bacterium	heterotroph	aerobe	aerobic respiration						3.05652											soil		0.0272291	0.316916	0.28685	0.256933	0.517577
unknown (no blast hit)	8.48062	23.0889	18.9419	19.7661	19.7731	19.5958	16.2096	12.4528	13.0354	8.59103	25.0658	22.2593	22.5137	24.8683	19.039	12.2238	13.9463	11.5572	14.0974	10.5561	9.46291	aerobic phototrophic respiration (Group F)	Acidobacteria - Subgroup 17 - uncultured Acidobacteriales bacterium	heterotroph	aerobe	aerobic respiration						8.73895											soil		0	0.0430853	0.0783589	0.103901	0.222331
																						variable energy metabolism (Group G)	Acidobacteria - Subgroup 17 - uncultured bacterium	heterotroph	aerobe	aerobic respiration						3.8774											soil		0.0556958	0.909578	0.270058	0.0716834	0.0753057
Summe (Abundance %)	100	100	100	100	100	100	100	100	100	100	100	100	100	100	100	100	100	100	100	100	100		Acidobacteria - Subgroup 17 - uncultured prokaryote	heterotroph	aerobe	aerobic respiration						2.80967											soil		0	0.087128	0.306439	0.327811	0.441076
																							Acidobacteria - Subgroup 6 - uncultured Acidobacteria bacterium	chemoheterotroph	aerobe	aerobic respiration						6.30692											Dedysh, 2018		0.0544581	0.675003	0.465956	0.299621	0.333497
																							Acidobacteria - Subgroup 6 - uncultured bacterium	chemoheterotroph	aerobe	aerobic respiration						14.2989											Dedysh, 2018		0.120055	1.79331	1.01447	0.786907	0.533117
																							Acidobacteria - Thermoanaerobaculia - Thermoanaerobaculales	heterotroph	Strict anaerobe	fermentation							14.2989	6.62862			6.62862						Losey, 2013		0.0928264	0.829152	0.971091	0.865839	0.247433
																							Actinobacteria - Acidimicrobiia - Actinomarinales	photoheterotroph (actinorhodopsin)	facultative aerobe	aerobic respiration		16.2926			16.2926	16.2926											Mizuno, 2015		0.288381	2.23373	0.975289	0.803821	0.933552
																							Actinobacteria - Acidimicrobiia - IMCC26256	heterotroph	aerobe	aerobic respiration						12.5271											(found in lakewater, no refs)		0.13367	0.780322	1.24675	1.02612	0.705244
																							Actinobacteria - Acidimicrobiia - Microtrichales	chemoorganoheterotroph	aerobe/microaerophil	aerobic respiration					39.082	39.082											McIlroy, 2013		14.3423	3.0581	0.681443	0.314924	0.119533
																							Actinobacteria - Actinobacteria - Corynebacteriales	heterotroph	aerobe	aerobic respiration						2.45605							2.45605			denitrification	Yamamura, 2018; Dastager, 2014		0.00371306	0.00574471	0.155319	0.166724	0.202011
																							Actinobacteria - Actinobacteria - Frankiales	heterotroph	aerobe/ microaerophil, root nodules	aerobic respiration					57.7499	57.7499								57.7499		nitrogen fixation	Sen, 2019		24.9926	0.198192	0.107744	0.107928	0.0490085
																							Actinobacteria - Actinobacteria - Micrococcales	heterotroph	aerobe	aerobic respiration						4.97895							4.97895			denitrification	Zhu, 2016		2.11025	0.153192	0.0237875	0.0273847	0.0394458
																							Actinobacteria - Actinobacteria - Micromonosporales	heterotroph	aerobe	aerobic respiration						1.58346											Kroppenstedt, 2005		0	0.00574471	0	0.00402716	0.0251019
																							Actinobacteria - Coriobacteriia - FS118-23B-02	heterotroph	facultative anaerobe/strict anaerobe	fermentation								1.22343			1.22343						Gupta, 2013		0	0.000957451	0.0153919	0.0507422	0.572562
																							Actinobacteria - Thermoleophilia - Gaiellales	heterotroph	strict aerobe, alkane degradation	aerobic respiration				Ac		10.6911											Yakimov, 2011		0.112629	0.397342	0.66885	0.787712	1.02798
																							Actinobacteria - WCHB1-81 - Actinobacteria bacterium	NA	aerobe	aerobic respiration																	NA		0	0	0.00559707	0.0193304	0.430318
																							Actinobacteria - WCHB1-81 - uncultured bacterium	NA	aerobe	aerobic respiration																	NA		0.0346552	0.0718088	0.145524	0.128869	0.252214
																							Bacteroidetes - Bacteroidia – Bacteroidales	chemoorganotroph (carbohydrate hydrolysis) (scavenger of cyanos or den)	Facultative aerobe/ strict anaerobe	fermentation								20.381								denitrification	Iino, 2015 (Prolixibacter); Hania, 2017		0.326749	1.43235	0.692637	0.831206	0.474545
																							Bacteroidetes - Bacteroidia - Chitinophagales	chemoorganotroph (carbohydrate hydrolysis)	aerobe/facultative anaerobe	aerobic respiration					11.4847	11.4847					11.4847						Munoz 2016, Alderkamp, 2006		2.29591	2.69331	0.109143	0.0217467	0.0239066
BACTERIA (Sulphate reducing bacteria --> Figure 11 C and D)																							Bacteroidetes - Bacteroidia - Cytophagales	chemoorganotroph (carbohydrate hydrolysis)	strict aerobe	aerobic respiration				6.93736		6.93736											Alderkamp, 2006		1.63869	0.710429	0.1903	0.105512	0.143439
Sample Code (Core-increment)	1-0 [%]	1-1 [%]	1-2 [%]	1-3 [%]	1-4 [%]	1-6 [%]	1-8 [%]	1-10 [%]	1-12 [%]	2-0 [%]	2-1 [%]	2-2 [%]	2-3 [%]	2-4 [%]	2-5 [%]	2-6 [%]	2-7 [%]	2-8 [%]	2-9 [%]	2-10 [%]	2-11 [%]		Bacteroidetes - Bacteroidia - Flavobacteriales	chemoorganotroph (carbohydrate hydrolysis)	aerobe/ facultative anaerobe	aerobic respiration					4.15939	4.15939											Alderkamp, 2006		2.02238	0.279576	0.0041978	0	0
Depth	-10	0	5	10	15	20	25	30	35	-10	0	5	10	15	17.5	20	22.5	25	27.5	30	32.5		Bacteroidetes - Bacteroidia - Sphingobacteriales	chemoorganotroph (carbohydrate hydrolysis)	aerobe/ facultative anaerobe	aerobic respiration					6.03913	6.03913											Alderkamp, 2006		1.82806	0.517023	0.162315	0.163503	0.0454225
																							Bacteroidetes - Ignavibacteria - Ignavibacteriales	chemoorganoheterotroph	Strict anaerobe/ facultative anaerobe	fermentation								7.9106			7.9106						Iino, 2010		0.103966	0.498832	0.20989	0.228743	0.0705244
Proteobacteria - Deltaproteobacteria - Desulfarculales	0.188128	2.18107	3.16794	3.07353	1.49416	1.23076	0.22941	0.461489	0.409889	0.263658	2.00925	4.31524	4.47969	4.02483	0.301309	0.381711	0.381228	0.435715	0.429967	0.423407	0.349661		Bacteroidetes - Ignavibacteria - Kryptoniales	chemoorganoheterotroph	anaerobe	fermentation								3.01657			3.01657						Iino, 2010		0.086638	0.5783	0.151121	0.125647	0.148221
Proteobacteria - Deltaproteobacteria - Desulfobacterales	0.102728	1.60565	2.6726	2.31481	2.19223	1.58449	0.25054	0.19384	0.217256	0.102193	1.1898	1.86936	2.0823	2.75019	0.269922	0.148791	0.135336	0.163486	0.203633	0.373309	0.132304		Calditrichaeota - Calditrichia - Calditrichales	organoheterotroph	anaerobe	fermentation								3.45805			3.45805						Marshall, 2017		0.0086638	0.0392555	0.223883	0.252906	0.276121
Proteobacteria - Deltaproteobacteria - NB1-j	0.0321798	0.599364	0.825567	0.669314	0.607227	0.862384	0.0392411	0.0588976	0.110801	0.0299766	0.372105	0.909802	0.944708	0.875663	0.0188318	0.0236397	0.0285921	0.0747152	0.095474	0.0678744	0.0661521		Chloroflexi - Anaerolineae - 1-20	chemoheterotroph (carbohydrate hydrolysis/ carb fermentation)	facultative anaerobe/strict anaerobe	fermentation								7.53144			7.53144						Hug, 2013; Xia, 2016; Andersen, 2019		0.100252	1.35767	0.528923	0.524336	0.207987
Proteobacteria - Deltaproteobacteria - NKB15	0.00247537	0.00478725	0.30504	0.180417	0.0155393	0.0207363	0	0	0.00217256	0.0054503	0.0104983	0.0552831	0.152335	0.665277	0.0125545	0	0.0066715	0.00295902	0.0040059	0.0129285	0.0157505		Chloroflexi - Anaerolineae - ADurb.Bin180	chemoheterotroph (carbohydrate hydrolysis/ carb fermentation)	facultative anaerobe/strict anaerobe	fermentation								3.67626			3.67626						Hug, 2013; Xia, 2016; Andersen, 2019		0.00618843	0.0478725	0.205692	0.353585	0.395654
Proteobacteria - Deltaproteobacteria - Sva0485	0.0371306	0.19532	1.01167	1.69141	2.33567	4.42048	3.52416	6.07764	7.1231	0.0258889	0.251375	0.487281	0.793531	1.02729	1.19582	6.37785	7.12325	7.03358	6.85477	6.39474	3.23516		Chloroflexi - Anaerolineae - Anaerolineales	chemoheterotroph (carbohydrate hydrolysis/ carb fermentation)	facultative anaerobe/strict anaerobe	fermentation								171.155			171.155						Hug, 2013; Xia, 2016; Andersen, 2019		1.19684	8.02248	4.17681	5.31585	5.783
Proteobacteria - Deltaproteobacteria - Syntrophobacterales	0.0519828	0.260427	1.03966	1.49971	2.99669	2.91283	0.866324	1.26518	1.11452	0.0306579	0.373271	1.00615	1.13064	1.32392	0.652836	1.14096	1.16846	1.34561	0.984784	0.882367	0.655221		Chloroflexi - Anaerolineae - Caldilineales	chemoorganotroph	facultative anaerobe	fermentation								11.0091			11.0091				11.0091	DNRA (genome)	Sekiguchi, 2003, Andersen, 2019 (genomes)		0.131195	2.47788	0.857751	1.17996	0.213964
Spirochaetes - Spirochaetia - Spirochaetales	0.047032	0.301597	0.471553	0.538028	0.50921	0.859945	0.599182	2.71376	3.08938	0.0436024	0.412348	0.65234	0.569373	0.397081	0.109852	1.08464	2.3274	3.88297	2.17788	1.70817	0.91983		Chloroflexi - Anaerolineae - MSB-5B2	chemoheterotroph (carbohydrate hydrolysis/ carb fermentation)	facultative anaerobe/strict anaerobe	fermentation								74.6811			74.6811						Hug, 2013; Xia, 2016; Andersen, 2019		0.00495074	0.0124469	0.0755604	0.100679	0.493671
Nitrospirae - Thermodesulfovibrionia - uncultured	0.25125	1.05224	2.33957	3.39006	2.23646	2.60423	1.08366	1.20032	1.52369	0.168278	0.86319	1.2336	1.52277	2.14272	0.386052	1.49486	1.48774	1.08966	1.21713	0.956706	1.25689		Chloroflexi - Anaerolineae - RBG-13-54-9	chemoheterotroph (carbohydrate hydrolysis/ carb fermentation)	facultative anaerobe/strict anaerobe	fermentation								5.66114			5.66114						Hug, 2013; Xia, 2016; Andersen, 2019		0.0309421	0.216384	0.323231	0.381775	0.27373
																							Chloroflexi - Anaerolineae - SBR1031	chemoheterotroph (carbohydrate hydrolysis/ carb fermentation)	facultative anaerobe/strict anaerobe	fermentation								26.8525			26.8525						Hug, 2013; Xia, 2016; Andersen, 2019		0.0655973	0.782237	0.566703	0.733748	1.45711
Summe (Abundance %)	0.712907	6.20045	11.8336	13.3573	12.3872	14.4959	6.59251	11.9711	13.5908	0.669705	5.48184	10.5291	11.6753	13.207	2.94718	10.6525	12.6587	14.0287	11.9676	10.8195	6.63097		Chloroflexi - Anaerolineae - SJA-15	chemoheterotroph (carbohydrate hydrolysis/ carb fermentation)	facultative anaerobe/strict anaerobe	fermentation								4.42012			4.42012						Hug, 2013; Xia, 2016; Andersen, 2019		0.0445567	0.430853	0.485546	0.526752	0.45303
																							Chloroflexi - Anaerolineae - uncultured	chemoheterotroph (carbohydrate hydrolysis/ carb fermentation)	facultative anaerobe/strict anaerobe	fermentation								5.61095			5.61095						Hug, 2013; Xia, 2016; Andersen, 2019		0.0123769	0.0813833	0.221084	0.295593	0.418365
																							Chloroflexi - Chloroflexia - Chloroflexales	photoheterotroph	facultative anaerobe	anoxygenic photosynthesis			1.09961					1.09961									Louyakis, 2018; Grouzdev, 2015		0.660924	0.00861706	0.00139927	0	0.00119533
BACTERIA (Abundant taxa --> Figure 11 A and B)																							Chloroflexi - Dehalococcoidia - 661239	chemoheterotroph (dehalogenation/fermenter/acetogen)	anaerobe	fermentation								3.7806			3.7806						Hug, 2013		0.00618843	0.0172341	0.0643663	0.0789323	0.157783
Sample Code (Core-increment)	1-0 [%]	1-1 [%]	1-2 [%]	1-3 [%]	1-4 [%]	1-6 [%]	1-8 [%]	1-10 [%]	1-12 [%]	2-0 [%]	2-1 [%]	2-2 [%]	2-3 [%]	2-4 [%]	2-5 [%]	2-6 [%]	2-7 [%]	2-8 [%]	2-9 [%]	2-10 [%]	2-11 [%]		Chloroflexi - Dehalococcoidia - GIF3	chemoheterotroph (dehalogenation/fermenter/acetogen)	facultative anaerobe	fermentation								21.1045			21.1045						Hug, 2013		0.00495074	0.00478725	0.0405787	0.0757106	0.114752
Depth	-10	0	5	10	15	20	25	30	35	-10	0	5	10	15	17.5	20	22.5	25	27.5	30	32.5		Chloroflexi - Dehalococcoidia - GIF9	chemoheterotroph (dehalogenation/fermenter/acetogen)	facultative anaerobe	fermentation								103.041			103.041						Hug, 2013		0.105203	0.34947	1.54619	2.26085	4.14062
																							Chloroflexi - JG30-KF-CM66 - uncultured bacterium	heterotroph	facultative aerobe	aerobic respiration					11.5834	11.5834											between chloroflexia and ktedonobacter, which are the aerobe branch of the chloroflexi		0.0086638	0.0794684	0.0909523	0.173168	0.687314
Acidobacteria	0.787168	10.0446	8.06537	9.66277	9.85788	11.3903	17.4774	14.0527	14.4214	0.776667	8.32629	9.33652	8.63849	8.98029	10.8659	13.4551	11.2472	11.0919	11.8875	9.31172	8.39502		Chloroflexi - KD4-96 - metagenome	heterotroph	facultative aerobe	aerobic respiration					4.76706	4.76706											between chloroflexia and ktedonobacter, which are the aerobe branch of the chloroflexi		0.0618843	0.369576	0.49674	0.513866	0.00239066
Actinobacteria	42.0182	6.90514	4.02569	3.43758	4.35697	3.43246	3.98298	1.81092	5.53785	46.2383	7.47184	6.53999	5.42497	5.68518	2.00559	2.02884	2.29309	1.65779	3.84834	2.66165	5.54418		Chloroflexi - KD4-96 - uncultured bacterium	heterotroph	facultative aerobe	aerobic respiration					6.42379	6.42379											between chloroflexia and ktedonobacter, which are the aerobe branch of the chloroflexi		0.107679	0.834897	0.338623	0.356806	0.467374
Bacteroidetes	8.30239	6.70982	1.5196	1.47636	0.906059	1.00388	0.984047	2.09795	2.38909	7.04246	6.23072	4.91783	4.03832	2.0271	0.0972976	1.81191	3.27666	2.84066	2.25666	1.66454	1.02378		Cyanobacteria - Oxyphotobacteria - Synechococcales	phototroph	aerobe	oxygenic photosynthesis	12.9739																Flombaum, 2013		1.87386	2.30458	0.243472	0.138534	0.118338
Chloroflexi	2.54839	15.0933	10.0201	12.8716	15.2679	24.2944	35.4347	46.8505	38.4326	3.07806	17.7846	16.4973	16.0149	12.79	10.2665	46.2524	45.6349	48.7905	44.4749	36.9043	28.0517		Deinococcus-Thermus - Deinococci - Deinococcales	chemoorganotroph (haloakaliphilic)	strict aerobe	aerobic respiration				3.291		3.34879											Ivanova, 2011		0.0915887	0.510321	0.352615	0.365666	0.210378
Cyanobacteria	1.87386	2.30458	0.243472	0.138534	0.118338	0.0475714	0.0120742	0.00670986	0.00362093	1.76249	2.01217	0.323011	0.868251	0.867134	1.56304	0.0848247	0.600435	0.0162746	0.127521	0.232712	0.61427		Firmicutes - Bacilli - Bacillales	chemoorganotroph	aerobe/facultative anaerobe	denitrification (under O2 limiting conditions)						5.90924							5.90924			aerobic respiration	Zhu, 2016		0.00371306	0.0114894	0.358212	0.331838	0.433904
Firmicutes-Clostridia	0.116342	0.453832	0.853553	1.04062	1.14393	1.31126	0.795388	0.315363	0.753878	0.102193	0.258374	0.58837	0.594859	0.549659	0.059634	0.407437	0.436506	0.641367	0.697027	0.694905	0.485116		Firmicutes - Clostridia - Clostridiales	heterotroph (acetogenesis)	Strict anaerobe	fermentation							5.90924	11.1196			11.1196						Vavourakis, 2018 (Syntrophomonas, Romboutsia)		0.116342	0.453832	0.853553	1.04062	1.14393
Firmicutes-Erysipelotrichia	1.71543	0.000957451	0	0	0	0.00121978	0	0	0	2.18829	0.00116647	0	0	0	0	0	0	0	0	0	0		Firmicutes - Erysipelotrichia - Erysipelotrichales	heterotroph	anaerobe	fermentation								3.90707			3.90707						Kanno, 2015 (mostly fecal associated)		1.71543	0.000957451	0	0	0
Gemmatimonadetes	0.992623	4.51247	2.74956	2.63215	1.01364	1.3442	0.247521	0.237827	0.312124	0.991954	4.49734	4.18967	3.55757	2.55876	0.150654	0.30662	0.324997	0.267791	0.309122	0.349068	0.163805		Gemmatimonadetes - BD2-11 terrestrial group - uncultured bacterium	photoheterotroph (ABC)	aerobe/ microaerophil	aerobic respiration		3.21338			3.21338	3.21338			3.21338								Janssen, 2006; Zeng; Baker, 2015		0.0309421	0.517023	0.131531	0.116788	0.121924
Nitrospirae	0.289618	1.83543	2.62502	3.44886	2.24363	2.62131	1.08819	1.20106	1.52441	0.219374	2.1399	2.21843	1.90332	2.52654	0.386052	1.49625	1.4887	1.08966	1.22046	0.958322	1.25689		Gemmatimonadetes - Gemmatimonadetes - Gemmatimonadales	photoheterotroph (ABC)	aerobe/ microaerophil	aerobic respiration		27.9832			27.9832	27.9832			27.9832								Zeng, 2015; Baker, 2015;		0.961681	3.99544	2.61803	2.51536	0.891715
Proteobacteria-Alpha	21.7474	2.22799	1.41326	1.27258	1.19533	1.60279	1.82169	1.2197	1.07035	19.7417	1.96492	2.43325	2.18829	1.79966	0.718747	1.39683	1.85372	1.3937	1.27254	1.10377	0.699323		Latescibacteria - Latescibacteria - Latescibacterales	NA, hydrocarbon degradation	anaerobe	fermentation								5.09326			5.09326						Dombrowski 2017		0.00495074	0.010532	0.144124	0.151421	0.338278
Proteobacteria-Delta	0.670825	6.07503	9.68992	10.0727	10.0718	11.5757	5.36849	8.46486	9.43398	0.668343	5.30862	9.1612	10.1016	11.3163	2.52032	8.31491	9.1571	9.62568	9.15616	8.45844	4.7346		Nitrospirae - Nitrospira - Nitrospirales	litoautotroph	aerobe	denitrification/nitrification									4.27873			4.27873	4.27873			sulfate-reduction	Cleary, 2015		0.0383682	0.783195	0.28545	0.0587965	0.00717197
Proteobacteria-Gamma	9.62424	17.3586	36.5544	30.4107	29.8187	17.6844	14.0755	6.33187	6.81315	7.92337	14.9297	18.0428	20.1018	21.631	50.5634	9.97247	6.13587	5.91508	6.60039	22.8317	35.3504		Nitrospirae - Thermodesulfovibrionia - uncultured	lithotroph	anaerobe	sulfate-reduction									27.2875								Kadnikov, 2018		0.25125	1.05224	2.33957	3.39006	2.23646
Spirochaetes	0.047032	0.301597	0.471553	0.538028	0.50921	0.859945	0.599182	2.71376	3.08938	0.0436024	0.412348	0.65234	0.569373	0.397081	0.109852	1.08464	2.3274	3.88297	2.17788	1.70817	0.91983		No blast hit - No blast hit - No blast hit	NA	NA	NA																	NA		4.53116	9.24419	8.9665	9.92775	9.88059
Verrucomicrobia	0.420813	2.86182	0.475751	0.483259	0.488889	0.378132	0.00905565	0.0700807	0.0803847	0.290228	2.6998	0.939813	0.915167	0.738249	0.034525	0.0271161	0.0257329	0.208611	0.125518	0.084035	0.0472515		Patescibacteria - Microgenomatia - Candidatus Curtissbacteria	NA	NA	NA								2.84834			2.84834						Danczak. 2019		0.00247537	0	0.302242	0.518698	1.39495
rare taxa	8.84573	23.3149	21.2926	22.5142	23.0077	22.4525	18.1037	14.6267	16.1378	8.93304	25.9622	24.1595	25.0831	28.1331	20.6585	13.3606	15.1977	12.578	15.846	13.0367	12.7138		Patescibacteria - Microgenomatia - Candidatus Woesebacteria	NA	NA	NA								5.62392			5.62392		5.62392				Castelle, 2017; Danczak, 2017		0.00247537	0.000957451	0.113341	0.288345	1.22521
																							Planctomycetes - Planctomycetacia - Pirellulales	heterotroph	aerobe/anaerobe	anaerobic respiration (anammox)						14.7028		14.7028			14.7028					fermentation	Gloeckner, 2003; Lage, 2014		0.316847	1.36437	0.97389	1.00518	0.725564
Summe (Abundance %)	100	100	100	100	100	100	100	100	100	100	100	100	100	100	100	100	100	100	100	100	100		Proteobacteria - Alphaproteobacteria - Acetobacterales	chemoorganotroph (ABC)	aerobe	aerobic respiration		1.95822				1.95822								1.95822		nitrogen fixation	Reis, 2015		0.212882	0.500747	0.0965494	0.0692671	0.0693291
																							Proteobacteria - Alphaproteobacteria - Rhizobiales	chemoheterotroph (methylotroph)	strict aerobe	aerobic respiration		20.4831				20.4831								20.4831		nitrogen fixation	Doronina, 2013 (Methyloliga)		0.393584	1.14511	1.06624	1.00115	1.06504
																							Proteobacteria - Alphaproteobacteria - SAR11 clade	heterotroph	strict aerobe	aerobic respiration: C1 oxidation				40.5371		40.5371											Sun, 2011; Henson, 2017		21.0753	0.0181916	0.0181905	0.00724889	0.00717197
																							Proteobacteria - Alphaproteobacteria - uncultured	heterotroph	aerobe	aerobic respiration						5.35598											NA		0.0655973	0.563939	0.232278	0.194915	0.0537898
																							Proteobacteria - Deltaproteobacteria - Desulfarculales	chemoorganotroph	Strict anaerobe	sulfate-reduction							29.459	29.459	29.459								Schneider, 2013		0.188128	2.18107	3.16794	3.07353	1.49416
																							Proteobacteria - Deltaproteobacteria - Desulfobacterales	chemoorganotroph/lithohetero/litoautotroph	anaerobe	sulfate-reduction								20.0492	20.0492						18.3408	DNRA	Foti, 2007, Vavourakis, 2018		0.102728	1.60565	2.6726	2.31481	2.19223
																							Proteobacteria - Deltaproteobacteria - Myxococcales	NA	strict aerobe, predatory/bacteriolytic	denitrification				9.869		9.869							9.869		8.38439	DNRA	Schneider, 2015; Baker, 2015		0.256201	1.22841	0.66745	0.64354	0.430318
																							Proteobacteria - Deltaproteobacteria - NB1-j	NA	NA	sulfate-reduction									7.17848								Dombrowski 2017		0.0321798	0.599364	0.825567	0.669314	0.607227
																							Proteobacteria - Deltaproteobacteria - NKB15	NA	NA	sulfate-reduction									1.4462								Dombrowski 2017		0.00247537	0.00478725	0.30504	0.180417	0.0155393
																							Proteobacteria - Deltaproteobacteria - Sva0485	NA	NA	sulfate-reduction									57.5872								Dombrowski 2017		0.0371306	0.19532	1.01167	1.69141	2.33567
																							Proteobacteria - Deltaproteobacteria - Syntrophobacterales	chemoorganotroph/chemolithoautotroph	anaerobe	sulfate-reduction								21.1646	21.1646								Dombrowski 2017		0.0519828	0.260427	1.03966	1.49971	2.99669
																							Proteobacteria - Gammaproteobacteria - Acidiferrobacterales	chemoautotroph	facultative anaerobe	sulfur oxidation								4.7601		2.70858							Dyksma. 2016		0.00495074	0.0765961	0.138527	0.162697	0.111166
																							Proteobacteria - Gammaproteobacteria - Alteromonadales	chemoorganoheterotroph	anaerobe	anaerobic respiration								15.8197				15.8197				nitrification	Wilkins, 2013		0.0160899	0.0038298	0.0405787	0.035439	0.0585711
																							Proteobacteria - Gammaproteobacteria - Beggiatoales	lithotroph	anaerobe	sulfur oxidation								1.8065		0.758884		1.8065				nitrification	Kavazanjian, 2008; Baker, 2015; salman, 2013		0	0.0344682	0.0153919	0.000805432	0.0262972
																							Proteobacteria - Gammaproteobacteria - Betaproteobacteriales	phototroph (denitrification/ sulfur ox/ iron red / anoxygenic photosynthesis (not here))	facultative anaerobe	Aerobic respiration (water: Burkholderiaceae) sulfur oxidation (sediment: Thiobacillus)			127.186					127.186		110.802			127.186			denitrification	Meyer, 2007		8.86925	12.3894	8.11155	7.02739	4.45499
																							Proteobacteria - Gammaproteobacteria - Diplorickettsiales	chemoorganotroph	strict aerobe	parasitic/ aerobic repsiration				2.14736		2.14736											Santos, 2003 (Aquicella)		0.00618843	0.0392555	0.163714	0.329422	0.835535
																							Proteobacteria - Gammaproteobacteria - Enterobacteriales	chemoorganotroph	facultative anaerobe	fermentation								110.086			110.086		110.086			denitrification	Leung, 2014		0.0123769	0.0162767	24.6873	20.3267	23.4392
																							Proteobacteria - Gammaproteobacteria - Gammaproteobacteria Incertae Sedis	heterotroph	microaerophile	aerobic respiration					5.77431	5.77431											Falagan, 2014 (Acidibacter ferrireducens)		0.293331	0.904791	0.345619	0.286734	0.0561804
																							Proteobacteria - Gammaproteobacteria - Oceanospirillales	heterotroph	facultative anaerobe	denitrification								33.4505					33.4505				Schneider, 2015		0.0767365	0.189575	0.0587692	0.163503	0.144635
																							Proteobacteria - Gammaproteobacteria - PLTA13	NA	NA	NA																	NA		0.175751	2.4348	1.30971	0.784491	0.124314
																							Proteobacteria - Gammaproteobacteria – Pseudomonadales (aerobic denitrifier = co-respiration)	chemoroganotroph	facultative anaerobe	aerobic respiration						2.17905		2.17905					2.17905			denitrification	Zhu, 2016		0.0272291	0.0373406	0.0657655	0.070878	0.276121
																							Proteobacteria - Gammaproteobacteria - Steroidobacterales	chemoorganotroph	facultative anaerobe	denitrification								15.1881					15.1881				Fahrbach, 2008		0.142334	1.23224	1.61755	1.22265	0.29166
																							Spirochaetes - Spirochaetia - Spirochaetales	chemoorganoheterotroph	Strict anaerobe/ facultative anaerobe	sulfate-reduction								20.7872	20.7872								Dubinina, 2011; Vishnuvardhan, 2013		0.047032	0.301597	0.471553	0.538028	0.50921
																							TA06 - uncultured bacterium - Bacteria	NA	anaerobe	fermentation								6.57809			6.57809						Baker, 2015		0.0519828	0.158937	0.590491	0.576689	1.0483
																							Verrucomicrobia - Verrucomicrobiae - Opitutales	chemoheterotroph	facultative aerobe	aerobic respiration					1.71594	1.71594								1.71594		nitrogen fixation	Chiang, 2018, Choo, 2007		0.0841626	0.666386	0.020989	0.0177195	0.00956263
																							Verrucomicrobia - Verrucomicrobiae - Pedosphaerales	chemoheterotroph	aerobe	aerobic respiration						6.53448								6.53448		nitrogen fixation	Chiang, 2018		0.070548	1.07522	0.426776	0.458291	0.466178
																							Verrucomicrobia - Verrucomicrobiae - S-BQ2-57 soil group	chemoheterotroph	aerobe	aerobic respiration						1.28759								1.28759		nitrogen fixation	Chiang, 2018		0.0358929	0.517023	0.0153919	0.00402716	0.00239066
																							Verrucomicrobia - Verrucomicrobiae - Verrucomicrobiales	chemoheterotroph	aerobe	aerobic respiration						1.73494								1.73494		nitrogen fixation	Chiang, 2018		0.230209	0.603194	0.0125934	0.00322173	0.010758
																							WS2 - uncultured bacterium - Bacteria	NA	NA	NA																	NA		0.00123769	0	0	0.0153032	0.080087
																							Zixibacteria - uncultured prokaryote – Bacteria (only genome available)	heterotroph	facultative anaerobe	aerobic respiration/fermentation						1.79593					1.79593						Wu, 2013 (RGB-1)		0.0123769	0.0335108	0.28545	0.575884	0.211573
																							rare_taxa																						3.75514	11.3755	7.96463	7.65563	6.85641
																							PSB = Photosynthetic sulfur bacterium
																							SRB = Sulfate reducing bacterium																						100	100	100	100	100
																							DNRA = dissimilatory nitrate reduction to ammonium
																							ABC = aerobic Bacteriochlorphyll a containing bac or aerobic anoxygenic phototroph
[truncated: 16 more columns]

## Sheet: Table S6
References
Alderkamp, A. C., Nejstgaard, J. C., Verity, P. G., Zirbel, M. J., Sazhin, A. F. and van Rijssel, M. (2006) Dynamics in carbohydrate composition of Phaeocystis pouchetii colonies during spring blooms in mesocosms. Journal of Sea Research, 55, 169-181.
Andersen, M. H., McIlroy, S. J., Nierychlo, M., Nielsen, P. H. and Albertsen, M. (2019) Genomic insights into Candidatus Amarolinea aalborgensis gen. nov., sp. nov., associated with settleability problems in wastewater treatment plants. Systematic and applied microbiology, 42, 77-84.
Baker, B. J., Lazar, C. S., Teske, A. P. and Dick, G. J. (2015) Genomic resolution of linkages in carbon, nitrogen, and sulfur cycling among widespread estuary sediment bacteria. Microbiome, 3, 14.
Castelle, C. J., Brown, C. T., Thomas, B. C., Williams, K. H. and Banfield, J. F. (2017) Unusual respiratory capacity and nitrogen metabolism in a Parcubacterium (OD1) of the Candidate Phyla Radiation. Scientific reports, 7, 40101
Chiang, E., Schmidt, M. L., Berry, M. A., Biddanda, B. A., Burtner, A., Johengen, T. H., Palladino, D. and Denef, V. J. (2018) Verrucomicrobia are prevalent in north-temperate freshwater lakes and display class-level preferences between lake habitats. PLoS One, 13, e0195112.
Choo, Y. J., Lee, K., Song, J. and Cho, J. C. (2007) Puniceicoccus vermicola gen. Nov., sp. Nov., a novel marine bacterium, and description of Puniceicoccaceae fam. Nov., Puniceicoccales ord. Nov., Opitutaceae fam. Nov., Opitutales ord. Nov. And Opitutae classics nov. in the phylum 'Verrucomicrobia'. Int J Syst Evol Microbiol, 57, 532-537.
Cleary, D. F., de Voogd. N. J., Polónia, A. R., Freitas, R. and Gomes, N. C. (2015). Composition and predictive functional analysis of bacterial communities in seawater, sediment and sponges in the Spermonde Archipelago, Indonesia. Microbial ecology, 70, 889-903.
Danczak, R. E., Johnston, M. D., Kenah, C., Slattery, M., Wrighton, K. C. and Wilkins, M. J. (2017). Members of the Candidate Phyla Radiation are functionally differentiated by carbon- and nitrogen-cycling capabilities. Microbiome, 5, 112
Dastager S. G., Tang, S. K., Srinivasan, K., Lee, J.C. and Li, W.J. (2014) Kocuria indica sp. nov., isolated from a sediment sample. Int J Syst Evol Microbiol, 64, 869-874
Dedysh, S. N., Kulichevskaya, I. S., Huber, K. J. and Overmann, J. (2017) Defining the taxonomic status of described subdivision 3 Acidobacteria: proposal of Bryobacteraceae fam. nov. Int J Syst Evol Microbiol, 67, 498-501
Dombrowski, N., Seitz, K. W., Teske, A. P. and Baker, B. J. (2017). Genomic insights into potential interdependencies in microbial hydrocarbon and nutrient cycling in hydrothermal sediments. Microbiome, 5, 106
Doronina, N. V., Poroshina, M. N., Kaparullina. E. N., Ezhov, V. A. and Trotsenko, Y. A. (2013) Methyloligella halotolerans gen. Nov., sp. Nov. and Methyloligella solikamskensis sp. nov., two non-pigmented halotolerant obligately methylotrophiy bacteria isloated from the Ural salie environments. Systematic and applied microbiology, 36, 148-154.
Dubinia, G., Margarita, G., Leshcheva, N., Rainey, F. A. and Gavrish E. (2011) Spirochaeta perfilievii sp. nov., an oxygen-tolerant, sulfide-oxidizing, sulfur and thiosulfate-reducing spirochaete isolated from a saline spring. Int J Syst Evol Microbiol, 61, 110-117
Dyksma, S. (2016) Identification and Activity of Bacteria Consuming Key Intermediates of Carbon and Sulfur Cycling in Coastal Sands (Doctoral dissertation, Universität Bremen).
Fahrbach, M., Kuever, J., Remesch, M., Huber, B. E., Kämpfer, P., Doww, W. and Hollender, J. (2008). Steroidobacter denitrificans gen. nov., a steroidal hormone-degrading gammaproteobacterium. Int J Syst Evol Microbiol, 58, 2215-2223.
Falagán, C. and Johnson, D. B. (2014) Acidibacter ferrireducens gen. nov., sp. nov.: an acidophilic ferric iron reducing gammaproteobacterium. Extremophiles, 18, 1067-1073.
Flombaum, P., Gallegos, J. L., Gordillo, R. A., Rincón, J., Zabala, L. L., Jiao, N. and Vera, C. S. (2013) Present and future global distributions of the marine Cyanobacteria Prochlorococcus and Synechococcus. Proceedings of the National Academy of Sciences, 110, 9824-9829
Foti, M., Sorokin, D.Y., Lomans, B., Mussman, M., Zacharova, E.E., Pimenov, N.V., Kuenen, J.G. and Muyzer, G. (2007) Diversity, activity, and abundance of sulfate-reducing bacteria in saline and hypersaline soda lakes. Appl. Environ. Microbiol., 73, 2093-2100.
Glöckner, F. O., Kube, M., Bauer, M., Teeling, H., Lombardot, T., Ludwig, W., Gade, D., Beck, A., Borzym, K., Heitmann, K. and Rabus, R. (2003) Complete genome sequence of the marine planctomycete Pirellula sp. strain 1. Proceedings of the National Academy of Sciences, 100, 8298-8303.
Grouzdev, D. S., Kuznetsov, B. B., Keppen, O. I., Krasil´nikova, E. N., Lebedeva, N. V. and Ivanovsky, R. N. (2015) Reconstruction of bacteriochlorophyll biosynthesis pathways in the filamentous anoxygenic phototrophic bacterium Oscillochloris trichoides DG-6 and evolution of anoxygenic phototrophs of the order Chloroflexales. Microbiology, 161, 120-130.
Gupta, R. S., Chen, W. J., Adeolu, M. and Chai, Y. (2013) Molecular signatures for the class Coriobacteriia into the emended order Coriobacteriales, containing the emended family Coriobacteriaceae and Atopobiaceae fam. nov., and Eggerthellales ord. nov., containing the family Eggerthellaceae fam. nov. Int J Syst Evol Microbiol, 63, 3379-3397.
Hania, W., Joseph, M., Bunk, B., Spröer. C., Klenk, H. P., Fardeau, M. L. and Spring, S. (2017) Characterization of the first cultured representative of a Bacteriodetes clade specialized on the scavenging of cyanobacteria. Environmental microbiology, 19, 1134-1148.
Hao, L., Mcllroy, S. J., Kirkegaard, R. H., Karst, S. M., Fernando, W. E. Y., Aslan, H., Meyer, R. L., Albertsem, M., Nielsen, P. H. and Dueholm, M. S. (2018) Novel prosthecate bacteria from the candidate phylum Acetothermia. The ISME journal, 12, 225.
Hensen, M. and Poonam, P. (2017) Byproduct cross feeding and community stability in an in silico biofilm model of the gut microbiome. Processes, 5, 13.
Hug, L. A., Castelle, C. J., Wrighton, K. C., Thomas, B. C., Sharon, I., Frischkorn, K. R., Willia,s, K. H., Tringe, S. G. and Banfield, J. F. (2013) Community genomic analyses contrain the distribution of metabolic traits across the Chloroflexi phylum and indicate roles in sediment carbon cycling. Microbiome, 1, 22.
Iino, T., Mori, K., Uchino, Y., Nakagawa, T., Harayama, S. and Suzuki, K. I. (2010). Ignavibacterium album gen. nov., sp. nov., a moderately thermophilic anaerobic bacterium isolated from microbial mats at a terrestrial hot spring and proposal of Ignavibacteria classis nov., for a novel lineage at the periphery of green sulfur bacteria. Int J Syst Evol Microbio, 60, 1376-1382.
Iino, T., Sakamoto, M. and Ohkuma, M. (2015) Prolixibacter denitrificans sp. nov., an iron-corroding, facultatively aerobic, nitrate-reducing bacterium isolated from crude oil, and emended descriptions of the genus Prolixibacter and Prolixibacter bellariivorans. Int J Syst Evol Microbiol, 65, 2865-2869.
Ivanova, N., Rohde, C., Munk, C., Nolan, M., Lucas, S., Del Rio, T. G., Tice, H., Deshpande, S., Cheng, J. F., Tapia, R. and Han, C. (2011) Complete genome sequence of Truepera radiovictrix type strain (RQ-24 T). Standards in Genomic Sciences, 4, 91.
Janssen, P. H. (2006) Identifying the dominant soil bacterial taxa in libraries of 16S rRNA and 16S rRNA genes. Appl. Environ. Microbiol., 3, 1719-1728
Kadnikov, V. V., Mardanov, A. V., Beletsky, A. V., Banks, D., Pimenov, N. V., Frank, Y. A., Karnachuk, O. V. and Ravin, N. V. (2018) A metagenomic window into the 2-km-deep terrestrial subsurface aquifer revealed multiple pathways of organic matter decomposition. FEMS microbiology ecology, 94, fiy152.
Kadnikov, V. V., Mardanov, A. V., Beletsky, A. V., Karnachuk, O. V. and Ravin, N. V. (2019) Genome of the candidate phylum Aminicenantes bacterium from a deep subsurface thermal aquifer revealed ist fermentative saccharolytic lifestyle. Extremophiles, 23, 189-200.
Kanno, M., Katayama, T., Morita, N., Tamaki, H., Hanada, S. and Kamagata, Y (2015) Catenisphaera adipataccumulans gen. nov., sp. nov., a member of the family Erysipelotrichaceae isolated from an anaerobic digester. Int J Syst Evol Microbiol, 65, 805-810.
Kavazanjian Jr, E. and Karatas, I. (2008) Microbiological improvement of the physical properties of soil.
Kroppenstedt, R. M., Mayilraj, S., Wink, J. M., Kallow, W., Schumann, P., Secondini, C. and Stackebrandt, E. (2005) Eight new species of the genus Micromonospora, Micromonospora citrea sp. nov., Micromonospora echinaurantiaca sp. nov., Micromonospora echinofusca sp. nov. Micromonospora fulviviridis sp. nov., Micromonospora inyonensis sp. nov., Micromonospora peucetia sp. nov., Micromonospora saga…
Lage, O. M. and Bondoso, J. (2014) Planctomycetes and macroalgae, a striking association. Frontiers in microbiology, 5, 267.
Leung, Y.H., Ng, A.M., Xu, X., Shen, Z., Gethings, L.A., Wong, M.T., Chan, C.M., Guo, M.Y., Ng, Y.H., Djurišić, A.B. and Lee, P.K. (2014) Mechanisms of antibacterial activity of MgO: non‐ROS mediated toxicity of MgO nanoparticles towards Escherichia coli. Small, 10, 1171-1183.
Losey, N. A., Stevenson, B. S., Busse, H. J., Damsté, J. S. S., Rijpstra, W. I. C., Rudd, S., and Lawson, P. A. (2013) Thermoanaerobaculum aquaticum gen. nov., sp. nov., the first cultivated member of Acidobacteria subdivision 23, isolated from a hot spring. Int J Syst Evol Microbiol, 63, 4149-4157.
Louyakis, A. S., Gourlé, H., Casaburi, G., Bonjawo, R. M., Duscher, A. A. and Foster, J. S. (2018) A year in the life of a thrombolite: comparative metatranscriptomics reveals dynamic metabolic changes over diel and seasonal cycles. Environmental microbiology, 20, 842-861.
Marshall, S., Hujer, A.M., Rojas, L.J., Papp-Wallace, K.M., Humphries, R.M., Spellberg, B., Hujer, K.M., Marshall, E.K., Rudin, S.D., Perez, F. and Wilson, B.M. (2017) Can ceftazidime-avibactam and aztreonam overcome β-lactam resistance conferred by metallo-β-lactamases in Enterobacteriaceae?. Antimicrobial agents and chemotherapy, 61, e02243-16.
McIlroy, S.J., Kristiansen, R., Albertsen, M., Karst, S.M., Rossetti, S., Nielsen, J.L., Tandoi, V., Seviour, R.J. and Nielsen, P.H. (2013) Metabolic model for the filamentous ‘Candidatus Microthrix parvicella’based on genomic and metagenomic analyses. The ISME journal, 7, 1161.
Meyer, B.and Kuever, J. (2007) Molecular analysis of the diversity of sulfate-reducing and sulfur-oxidizing prokaryotes in the environment, using aprA as functional marker gene. Appl. Environ. Microbiol., 73, 7664-7679.
Mizuno, C. M., Rodriguez-Valera, F. and Ghai, R. (2015) Genomes of planktonic acidimicrobiales: widening horizons for marine actinobacteria by metagenomics. MBio, 6, e02083-14.
Munoz, R., Rosselló-Móra, R. and Amann, R. (2016) Revised phylogeny of Bacteroidetes and proposal of sixteen new taxa and two new combinations including Rhodothermaeota phyl. nov. Systematic and applied microbiology, 39, 281-296.
Reis, M. P., Ávila, M. P., Keijzer, R. M., Barbosa, F. A., Chartone-Souza, E., Nascimento, A. and Laanbroek, H. J. (2015) The effect of human settlement on the abundance and community structure of ammonia oxidizers in tropical stream sediments. Frontiers in microbiology, 6, 898.
Salman, V., Bailey, J. V. and Teske, A. (2013) Phylogenetic and morphologic complexity of giant sulphur bacteria. Antonie Van Leeuwenhoek, 104, 169-186.
Santos, A., San Mauro, M., Sanchez, A., Torres, J. M. and Marquina, D. (2003) The antimicrobial properties of different strains of Lactobacillus spp. isolated from kefir. Systematic and applied Microbiology, 26, 434-437.
Schneider, D., Arp, G., Reimer, A., Reitner, J. and Daniel, R. (2013) Phylogenetic analysis of a microbialite-forming microbial mat from a hypersaline lake of the Kiritimati Atoll, Central Pacific. PLoS One, 8, e66662.
Sen, A., Tisa, L.S., Gtari, M. and Sarkar I. (2019) Contrasted evolutionary constraints on carbohydrate active enzymes (CAZymes. Antoine van Leeuwenhoek, 122, 115-125.
Schneider, D., Reimer, A., Hahlbrock, A., Arp, G. and Daniel, R. (2015) Metagenomic and metatranscriptomic analyses of bacterial communities derived from a calcifying karst water creek biofilm and tufa. Geomicrobiology Journal, 32, 316-331.
Sekiguchi, Y., Yamada, T., Hanada, S., Ohashi, A., Harada, H. and Kamagata, Y. (2003) Anaerolinea thermophila gen. nov., sp. nov. and Caldilinea aerophila gen. nov., sp. nov., novel filamentous thermophiles that represent a previously uncultured lineage of the domain Bacteria at the subphylum level. International journal of systematic and evolutionary microbiology, 53, 1843-1851.
Sharon, I., Kertesz, M., Hug, L.A., Pushkarev, D., Blauwkamp, T.A., Castelle, C.J., Amirebrahimi, M., Thomas, B.C., Burstein, D., Tringe, S.G. and Williams, K.H. (2015) Accurate, multi-kb reads resolve complex populations and detect rare microorganisms. Genome research, 25, 534-543.
Sun, J., Steindler, L., Thrash, J.C., Halsey, K.H., Smith, D.P., Carter, A.E., Landry, Z.C. and Giovannoni, S.J. (2011) One carbon metabolism in SAR11 pelagic marine bacteria. PloS one, 6, e23973.
Vavourakis, C. D., Andrei, A. S., Mehrshad, M., Ghai, R., Sorokin, D. Y. and Muyzer, G. (2018) A metagenomics roadmap to the uncultured genome diversity in hypersaline soda lake sediments. Microbiome, 6, 168.
Vishnuvardhan Reddy, S., Aspana, S., Tushar, D. L. Sasikala C. and Ramana C. V. (2013) Spirochaeta sphaeroplastigenens sp. nov., a halo-alkaliphilic, obligately anaerobic spirochaete isolated from soda lake Lonar. Int J Syst Evol Microbiol, 63.
Wilkins, D., Lauro, F.M., Williams, T.J., Demaere, M.Z., Brown, M.V., Hoffman, J.M., Andrews‐Pfannkoch, C., Mcquaid, J.B., Riddle, M.J., Rintoul, S.R. and Cavicchioli, R. (2013) Biogeographic partitioning of S outhern O cean microorganisms revealed by metagenomics. Environmental microbiology, 15,1318-1333.
Wu, T., Zhang, Z., Liu, B., Hou, D., Liang, Y., Zhang, J. and Shi, P. (2013) Gut microbiota dysbiosis and bacterial community assembly associated with cholesterol gallstones in large-scale study. BMC genomics, 14(1), p.669.
Xia, Y., Wang, Y., Wang, Y., Chin, F. Y. and Zhang, T. (2016) Cellular adhesiveness and cellulolytic capacity in Anaerolineae revealed by omics-based genome interpretation. Biotechnology for biofuels, 9, 111.
Yakimov, M.M., La Cono, V., Smedile, F., DeLuca, T.H., Juárez, S., Ciordia, S., Fernández, M., Albar, J.P., Ferrer, M., Golyshin, P.N. and Giuliano, L. (2011) Contribution of crenarchaeal autotrophic ammonia oxidizers to the dark primary production in Tyrrhenian deep waters (Central Mediterranean Sea). The ISME journal, 5, 945.
Yamamura, S., Sudo, T., Watanabe, M., Tsuboi, S., Soda, S., Ike, M. and Amachi, S. (2018). Effect of extracellular electron shuttles on arsenic-mobilizing activities in soil microbial communities. Journal of hazardous materials, 342, 571-578.
Zeng, Y., Selyanin, V., Lukeš, M., Dean, J., Kaftan, D., Feng, F., and Koblížek, M. (2015) Characterization of the microaerophilic, bacteriochlorophyll a-containing bacterium Gemmatimonas phototrophica sp. nov., and emended descriptions of the genus Gemmatimonas and Gemmatimonas aurantiaca. International journal of systematic and evolutionary microbiology, 65, 2410-2419.
Zhu, Y., Bai, J., Zhang, Y., Xiao, X., and Dong, Y. (2016) Effects of bitter melon (Momordica charantia L.) on the gut microbiota in high fat diet and low dose streptozocin-induced rats. International journal of food sciences and nutrition, 67, 686-695.
