# Supplementary material for: Authigenic formation of Ca–Mg carbonates in the shallow alkaline Lake Neusiedl, Austria
Source: Copernicus journal article supplement (doi:10.5194/bg-17-2085-2020), 2020-04-16
Supplement: Supplementary file 1 [file bg-17-2085-2020-supplement.zip › Supplementary data/LN_XRD_Data_XY.xlsx]

## Sheet: XY-Data
LN-K04-01		LN-K04-02		LN-K04-03		LN-K04-04		LN-K04-05		LN-K04-06		LN-K04-07		LN-K04-08		LN-K04-09		LN-K04-10		LN-K04-11		LN-K04-12		LN-K04-13
Angle	Intensity	Angle	Intensity	Angle	Intensity	Angle	Intensity	Angle	Intensity	Angle	Intensity	Angle	Intensity	Angle	Intensity	Angle	Intensity	Angle	Intensity	Angle	Intensity	Angle	Intensity	Angle	Intensity
[2θ]	[counts]	[2θ]	[counts]	[2θ]	[counts]	[2θ]	[counts]	[2θ]	[counts]	[2θ]	[counts]	[2θ]	[counts]	[2θ]	[counts]	[2θ]	[counts]	[ø2é]	[counts]	[2θ]	[counts]	[2θ]	[counts]	[2θ]	[counts]
1.75936	150	1.75936	162	1.75936	138	1.75936	148	1.75936	163	1.75936	195	1.75936	199	1.75936	151	1.75936	195	1.75936	195	1.75936	129	1.75936	147	1.75936	132
1.77636	154	1.77636	143	1.77636	145	1.77636	135	1.77636	156	1.77636	203	1.77636	212	1.77636	151	1.77636	199	1.77636	199	1.77636	151	1.77636	175	1.77636	117
1.79336	143	1.79336	170	1.79336	147	1.79336	165	1.79336	154	1.79336	181	1.79336	188	1.79336	150	1.79336	188	1.79336	188	1.79336	137	1.79336	171	1.79336	100
1.81036	139	1.81036	153	1.81036	145	1.81036	159	1.81036	156	1.81036	188	1.81036	173	1.81036	145	1.81036	201	1.81036	201	1.81036	136	1.81036	159	1.81036	136
1.82736	155	1.82736	142	1.82736	138	1.82736	161	1.82736	147	1.82736	176	1.82736	194	1.82736	133	1.82736	173	1.82736	173	1.82736	117	1.82736	150	1.82736	118
1.84436	141	1.84436	124	1.84436	151	1.84436	160	1.84436	135	1.84436	179	1.84436	186	1.84436	144	1.84436	194	1.84436	194	1.84436	137	1.84436	137	1.84436	124
1.86136	130	1.86136	150	1.86136	138	1.86136	166	1.86136	132	1.86136	174	1.86136	192	1.86136	136	1.86136	175	1.86136	175	1.86136	131	1.86136	161	1.86136	114
1.87836	125	1.87836	125	1.87836	125	1.87836	119	1.87836	133	1.87836	191	1.87836	172	1.87836	154	1.87836	189	1.87836	189	1.87836	122	1.87836	147	1.87836	126
1.89536	121	1.89536	131	1.89536	126	1.89536	130	1.89536	149	1.89536	163	1.89536	157	1.89536	130	1.89536	181	1.89536	181	1.89536	117	1.89536	152	1.89536	102
1.91236	135	1.91236	142	1.91236	133	1.91236	132	1.91236	135	1.91236	159	1.91236	187	1.91236	141	1.91236	157	1.91236	157	1.91236	113	1.91236	125	1.91236	116
1.92936	122	1.92936	137	1.92936	142	1.92936	159	1.92936	157	1.92936	154	1.92936	173	1.92936	121	1.92936	140	1.92936	140	1.92936	118	1.92936	136	1.92936	114
1.94636	138	1.94636	114	1.94636	131	1.94636	154	1.94636	141	1.94636	139	1.94636	164	1.94636	136	1.94636	162	1.94636	162	1.94636	115	1.94636	141	1.94636	114
1.96336	124	1.96336	116	1.96336	133	1.96336	152	1.96336	132	1.96336	154	1.96336	158	1.96336	143	1.96336	147	1.96336	147	1.96336	154	1.96336	128	1.96336	119
1.98036	117	1.98036	135	1.98036	127	1.98036	133	1.98036	127	1.98036	156	1.98036	155	1.98036	123	1.98036	148	1.98036	148	1.98036	123	1.98036	135	1.98036	115
1.99736	113	1.99736	132	1.99736	116	1.99736	131	1.99736	138	1.99736	139	1.99736	149	1.99736	113	1.99736	149	1.99736	149	1.99736	105	1.99736	120	1.99736	113
2.01436	105	2.01436	139	2.01436	128	2.01436	127	2.01436	120	2.01436	139	2.01436	146	2.01436	112	2.01436	144	2.01436	144	2.01436	102	2.01436	105	2.01436	115
2.03136	96	2.03136	134	2.03136	110	2.03136	124	2.03136	118	2.03136	135	2.03136	158	2.03136	105	2.03136	127	2.03136	127	2.03136	117	2.03136	95	2.03136	116
2.04836	113	2.04836	112	2.04836	108	2.04836	134	2.04836	126	2.04836	142	2.04836	149	2.04836	108	2.04836	146	2.04836	146	2.04836	121	2.04836	114	2.04836	106
2.06536	121	2.06536	131	2.06536	115	2.06536	120	2.06536	141	2.06536	140	2.06536	149	2.06536	118	2.06536	159	2.06536	159	2.06536	111	2.06536	127	2.06536	111
2.08236	112	2.08236	124	2.08236	114	2.08236	105	2.08236	134	2.08236	142	2.08236	138	2.08236	119	2.08236	157	2.08236	157	2.08236	104	2.08236	128	2.08236	110
2.09936	98	2.09936	115	2.09936	110	2.09936	115	2.09936	125	2.09936	125	2.09936	125	2.09936	114	2.09936	151	2.09936	151	2.09936	96	2.09936	124	2.09936	110
2.11636	104	2.11636	113	2.11636	117	2.11636	115	2.11636	118	2.11636	130	2.11636	126	2.11636	101	2.11636	146	2.11636	146	2.11636	113	2.11636	126	2.11636	108
2.13336	99	2.13336	118	2.13336	117	2.13336	117	2.13336	119	2.13336	125	2.13336	138	2.13336	96	2.13336	140	2.13336	140	2.13336	106	2.13336	120	2.13336	102
2.15036	87	2.15036	118	2.15036	95	2.15036	121	2.15036	118	2.15036	135	2.15036	127	2.15036	104	2.15036	134	2.15036	134	2.15036	102	2.15036	121	2.15036	106
2.16736	97	2.16736	121	2.16736	97	2.16736	113	2.16736	121	2.16736	140	2.16736	135	2.16736	110	2.16736	133	2.16736	133	2.16736	98	2.16736	117	2.16736	102
2.18436	100	2.18436	113	2.18436	107	2.18436	118	2.18436	115	2.18436	131	2.18436	130	2.18436	109	2.18436	142	2.18436	142	2.18436	98	2.18436	131	2.18436	95
2.20136	103	2.20136	106	2.20136	110	2.20136	116	2.20136	115	2.20136	122	2.20136	122	2.20136	110	2.20136	145	2.20136	145	2.20136	107	2.20136	110	2.20136	101
2.21836	106	2.21836	102	2.21836	119	2.21836	101	2.21836	116	2.21836	130	2.21836	131	2.21836	98	2.21836	134	2.21836	134	2.21836	108	2.21836	94	2.21836	101
2.23536	106	2.23536	91	2.23536	115	2.23536	113	2.23536	113	2.23536	134	2.23536	130	2.23536	102	2.23536	133	2.23536	133	2.23536	113	2.23536	116	2.23536	107
2.25236	98	2.25236	108	2.25236	102	2.25236	106	2.25236	109	2.25236	120	2.25236	119	2.25236	117	2.25236	127	2.25236	127	2.25236	100	2.25236	116	2.25236	99
2.26936	106	2.26936	114	2.26936	97	2.26936	101	2.26936	104	2.26936	115	2.26936	109	2.26936	112	2.26936	116	2.26936	116	2.26936	87	2.26936	106	2.26936	101
2.28636	107	2.28636	125	2.28636	93	2.28636	106	2.28636	106	2.28636	117	2.28636	119	2.28636	98	2.28636	131	2.28636	131	2.28636	84	2.28636	110	2.28636	99
2.30336	99	2.30336	117	2.30336	105	2.30336	109	2.30336	119	2.30336	108	2.30336	128	2.30336	97	2.30336	128	2.30336	128	2.30336	83	2.30336	102	2.30336	77
2.32036	98	2.32036	95	2.32036	98	2.32036	105	2.32036	118	2.32036	105	2.32036	113	2.32036	101	2.32036	121	2.32036	121	2.32036	92	2.32036	94	2.32036	81
2.33736	100	2.33736	97	2.33736	100	2.33736	98	2.33736	105	2.33736	106	2.33736	115	2.33736	102	2.33736	119	2.33736	119	2.33736	101	2.33736	104	2.33736	92
2.35436	96	2.35436	104	2.35436	101	2.35436	102	2.35436	99	2.35436	98	2.35436	126	2.35436	93	2.35436	116	2.35436	116	2.35436	88	2.35436	112	2.35436	93
2.37136	91	2.37136	99	2.37136	99	2.37136	106	2.37136	93	2.37136	114	2.37136	120	2.37136	101	2.37136	115	2.37136	115	2.37136	80	2.37136	94	2.37136	88
2.38836	90	2.38836	91	2.38836	108	2.38836	105	2.38836	103	2.38836	113	2.38836	96	2.38836	96	2.38836	124	2.38836	124	2.38836	79	2.38836	96	2.38836	87
2.40536	86	2.40536	91	2.40536	101	2.40536	103	2.40536	104	2.40536	99	2.40536	107	2.40536	102	2.40536	117	2.40536	117	2.40536	67	2.40536	93	2.40536	105
2.42236	86	2.42236	91	2.42236	100	2.42236	93	2.42236	84	2.42236	105	2.42236	105	2.42236	111	2.42236	121	2.42236	121	2.42236	86	2.42236	94	2.42236	102
2.43936	98	2.43936	97	2.43936	96	2.43936	96	2.43936	101	2.43936	110	2.43936	106	2.43936	106	2.43936	119	2.43936	119	2.43936	102	2.43936	96	2.43936	93
2.45636	92	2.45636	89	2.45636	98	2.45636	90	2.45636	108	2.45636	99	2.45636	115	2.45636	103	2.45636	123	2.45636	123	2.45636	90	2.45636	111	2.45636	100
2.47336	89	2.47336	97	2.47336	97	2.47336	95	2.47336	92	2.47336	98	2.47336	113	2.47336	97	2.47336	119	2.47336	119	2.47336	78	2.47336	109	2.47336	108
2.49036	84	2.49036	93	2.49036	100	2.49036	96	2.49036	97	2.49036	114	2.49036	113	2.49036	94	2.49036	91	2.49036	91	2.49036	80	2.49036	108	2.49036	91
2.50736	91	2.50736	107	2.50736	116	2.50736	99	2.50736	109	2.50736	117	2.50736	120	2.50736	84	2.50736	96	2.50736	96	2.50736	77	2.50736	107	2.50736	78
2.52436	96	2.52436	91	2.52436	90	2.52436	91	2.52436	103	2.52436	104	2.52436	110	2.52436	92	2.52436	119	2.52436	119	2.52436	81	2.52436	118	2.52436	87
2.54136	86	2.54136	105	2.54136	86	2.54136	94	2.54136	104	2.54136	107	2.54136	102	2.54136	87	2.54136	123	2.54136	123	2.54136	80	2.54136	105	2.54136	83
2.55836	69	2.55836	76	2.55836	86	2.55836	89	2.55836	98	2.55836	113	2.55836	102	2.55836	97	2.55836	99	2.55836	99	2.55836	81	2.55836	89	2.55836	89
2.57536	89	2.57536	82	2.57536	110	2.57536	89	2.57536	98	2.57536	90	2.57536	100	2.57536	91	2.57536	116	2.57536	116	2.57536	75	2.57536	95	2.57536	88
2.59236	73	2.59236	82	2.59236	94	2.59236	97	2.59236	86	2.59236	88	2.59236	105	2.59236	98	2.59236	113	2.59236	113	2.59236	72	2.59236	93	2.59236	81
2.60936	88	2.60936	85	2.60936	90	2.60936	95	2.60936	81	2.60936	97	2.60936	107	2.60936	84	2.60936	107	2.60936	107	2.60936	82	2.60936	95	2.60936	93
2.62636	86	2.62636	96	2.62636	80	2.62636	91	2.62636	91	2.62636	103	2.62636	98	2.62636	82	2.62636	96	2.62636	96	2.62636	79	2.62636	91	2.62636	91
2.64336	63	2.64336	94	2.64336	94	2.64336	89	2.64336	79	2.64336	102	2.64336	89	2.64336	83	2.64336	120	2.64336	120	2.64336	83	2.64336	104	2.64336	85
2.66036	87	2.66036	87	2.66036	86	2.66036	89	2.66036	89	2.66036	99	2.66036	96	2.66036	70	2.66036	90	2.66036	90	2.66036	68	2.66036	97	2.66036	82
2.67736	92	2.67736	81	2.67736	74	2.67736	88	2.67736	72	2.67736	98	2.67736	96	2.67736	64	2.67736	111	2.67736	111	2.67736	92	2.67736	109	2.67736	83
2.69436	82	2.69436	73	2.69436	91	2.69436	80	2.69436	85	2.69436	88	2.69436	85	2.69436	72	2.69436	77	2.69436	77	2.69436	65	2.69436	99	2.69436	81
2.71136	82	2.71136	88	2.71136	72	2.71136	91	2.71136	92	2.71136	83	2.71136	87	2.71136	101	2.71136	103	2.71136	103	2.71136	75	2.71136	107	2.71136	90
2.72836	71	2.72836	85	2.72836	78	2.72836	94	2.72836	73	2.72836	90	2.72836	120	2.72836	68	2.72836	94	2.72836	94	2.72836	76	2.72836	101	2.72836	72
2.74536	76	2.74536	92	2.74536	82	2.74536	81	2.74536	82	2.74536	96	2.74536	87	2.74536	71	2.74536	89	2.74536	89	2.74536	90	2.74536	86	2.74536	69
2.76236	68	2.76236	75	2.76236	85	2.76236	76	2.76236	86	2.76236	84	2.76236	111	2.76236	80	2.76236	95	2.76236	95	2.76236	80	2.76236	87	2.76236	72
2.77936	75	2.77936	91	2.77936	61	2.77936	74	2.77936	84	2.77936	86	2.77936	88	2.77936	71	2.77936	116	2.77936	116	2.77936	73	2.77936	91	2.77936	69
2.79636	80	2.79636	81	2.79636	81	2.79636	74	2.79636	80	2.79636	89	2.79636	84	2.79636	70	2.79636	97	2.79636	97	2.79636	78	2.79636	92	2.79636	82
2.81336	78	2.81336	72	2.81336	76	2.81336	89	2.81336	100	2.81336	81	2.81336	81	2.81336	74	2.81336	87	2.81336	87	2.81336	69	2.81336	100	2.81336	74
2.83036	74	2.83036	70	2.83036	87	2.83036	84	2.83036	86	2.83036	93	2.83036	87	2.83036	77	2.83036	70	2.83036	70	2.83036	75	2.83036	80	2.83036	82
2.84736	82	2.84736	85	2.84736	83	2.84736	72	2.84736	81	2.84736	98	2.84736	76	2.84736	84	2.84736	103	2.84736	103	2.84736	75	2.84736	81	2.84736	83
2.86436	59	2.86436	81	2.86436	79	2.86436	94	2.86436	99	2.86436	82	2.86436	81	2.86436	77	2.86436	83	2.86436	83	2.86436	77	2.86436	90	2.86436	80
2.88136	70	2.88136	81	2.88136	84	2.88136	85	2.88136	101	2.88136	84	2.88136	94	2.88136	59	2.88136	101	2.88136	101	2.88136	68	2.88136	89	2.88136	86
2.89836	83	2.89836	79	2.89836	82	2.89836	84	2.89836	92	2.89836	91	2.89836	90	2.89836	63	2.89836	100	2.89836	100	2.89836	72	2.89836	92	2.89836	86
2.91536	71	2.91536	86	2.91536	81	2.91536	93	2.91536	66	2.91536	91	2.91536	94	2.91536	79	2.91536	81	2.91536	81	2.91536	73	2.91536	90	2.91536	84
2.93236	77	2.93236	80	2.93236	72	2.93236	88	2.93236	79	2.93236	82	2.93236	89	2.93236	91	2.93236	89	2.93236	89	2.93236	61	2.93236	74	2.93236	70
2.94936	82	2.94936	77	2.94936	79	2.94936	80	2.94936	82	2.94936	90	2.94936	96	2.94936	75	2.94936	97	2.94936	97	2.94936	61	2.94936	83	2.94936	88
2.96636	69	2.96636	66	2.96636	76	2.96636	79	2.96636	93	2.96636	76	2.96636	95	2.96636	74	2.96636	86	2.96636	86	2.96636	68	2.96636	85	2.96636	93
2.98336	79	2.98336	69	2.98336	72	2.98336	91	2.98336	88	2.98336	84	2.98336	87	2.98336	72	2.98336	81	2.98336	81	2.98336	82	2.98336	85	2.98336	77
3.00036	88	3.00036	66	3.00036	76	3.00036	89	3.00036	64	3.00036	81	3.00036	77	3.00036	80	3.00036	84	3.00036	84	3.00036	77	3.00036	89	3.00036	92
3.01736	78	3.01736	71	3.01736	76	3.01736	87	3.01736	69	3.01736	85	3.01736	71	3.01736	83	3.01736	73	3.01736	73	3.01736	72	3.01736	95	3.01736	83
3.03436	73	3.03436	72	3.03436	67	3.03436	82	3.03436	81	3.03436	87	3.03436	84	3.03436	73	3.03436	73	3.03436	73	3.03436	75	3.03436	88	3.03436	89
3.05136	79	3.05136	70	3.05136	74	3.05136	79	3.05136	80	3.05136	71	3.05136	89	3.05136	72	3.05136	88	3.05136	88	3.05136	64	3.05136	70	3.05136	79
3.06836	75	3.06836	83	3.06836	80	3.06836	79	3.06836	74	3.06836	68	3.06836	79	3.06836	73	3.06836	108	3.06836	108	3.06836	58	3.06836	68	3.06836	63
3.08536	64	3.08536	85	3.08536	69	3.08536	86	3.08536	73	3.08536	76	3.08536	73	3.08536	78	3.08536	85	3.08536	85	3.08536	61	3.08536	66	3.08536	79
3.10236	65	3.10236	77	3.10236	68	3.10236	83	3.10236	77	3.10236	83	3.10236	80	3.10236	81	3.10236	78	3.10236	78	3.10236	78	3.10236	67	3.10236	83
3.11936	61	3.11936	69	3.11936	70	3.11936	75	3.11936	84	3.11936	84	3.11936	82	3.11936	78	3.11936	81	3.11936	81	3.11936	88	3.11936	78	3.11936	75
3.13636	74	3.13636	63	3.13636	72	3.13636	72	3.13636	88	3.13636	86	3.13636	75	3.13636	72	3.13636	84	3.13636	84	3.13636	69	3.13636	83	3.13636	77
3.15336	82	3.15336	72	3.15336	61	3.15336	74	3.15336	87	3.15336	91	3.15336	73	3.15336	72	3.15336	91	3.15336	91	3.15336	63	3.15336	87	3.15336	79
3.17036	69	3.17036	74	3.17036	63	3.17036	82	3.17036	81	3.17036	88	3.17036	86	3.17036	73	3.17036	94	3.17036	94	3.17036	75	3.17036	85	3.17036	83
3.18736	68	3.18736	74	3.18736	73	3.18736	78	3.18736	74	3.18736	75	3.18736	88	3.18736	69	3.18736	86	3.18736	86	3.18736	76	3.18736	75	3.18736	75
3.20436	66	3.20436	72	3.20436	63	3.20436	77	3.20436	76	3.20436	67	3.20436	85	3.20436	65	3.20436	83	3.20436	83	3.20436	65	3.20436	75	3.20436	74
3.22136	72	3.22136	77	3.22136	59	3.22136	76	3.22136	69	3.22136	72	3.22136	79	3.22136	70	3.22136	79	3.22136	79	3.22136	62	3.22136	79	3.22136	70
3.23836	69	3.23836	83	3.23836	62	3.23836	85	3.23836	67	3.23836	78	3.23836	79	3.23836	66	3.23836	72	3.23836	72	3.23836	77	3.23836	75	3.23836	62
3.25536	63	3.25536	77	3.25536	69	3.25536	92	3.25536	63	3.25536	78	3.25536	72	3.25536	66	3.25536	72	3.25536	72	3.25536	78	3.25536	85	3.25536	64
3.27236	63	3.27236	73	3.27236	73	3.27236	75	3.27236	69	3.27236	70	3.27236	73	3.27236	71	3.27236	84	3.27236	84	3.27236	60	3.27236	84	3.27236	68
3.28936	80	3.28936	67	3.28936	68	3.28936	67	3.28936	80	3.28936	65	3.28936	73	3.28936	67	3.28936	88	3.28936	88	3.28936	61	3.28936	79	3.28936	67
3.30636	76	3.30636	62	3.30636	59	3.30636	70	3.30636	81	3.30636	63	3.30636	72	3.30636	66	3.30636	82	3.30636	82	3.30636	69	3.30636	78	3.30636	75
3.32336	60	3.32336	65	3.32336	65	3.32336	68	3.32336	78	3.32336	69	3.32336	74	3.32336	66	3.32336	89	3.32336	89	3.32336	71	3.32336	77	3.32336	69
3.34036	66	3.34036	66	3.34036	71	3.34036	69	3.34036	69	3.34036	73	3.34036	77	3.34036	64	3.34036	80	3.34036	80	3.34036	71	3.34036	82	3.34036	65
3.35736	67	3.35736	75	3.35736	64	3.35736	79	3.35736	70	3.35736	74	3.35736	74	3.35736	72	3.35736	88	3.35736	88	3.35736	73	3.35736	83	3.35736	78
3.37436	62	3.37436	59	3.37436	54	3.37436	81	3.37436	83	3.37436	79	3.37436	78	3.37436	73	3.37436	83	3.37436	83	3.37436	74	3.37436	68	3.37436	72
3.39136	71	3.39136	72	3.39136	51	3.39136	80	3.39136	70	3.39136	77	3.39136	79	3.39136	74	3.39136	79	3.39136	79	3.39136	64	3.39136	74	3.39136	69
3.40836	69	3.40836	88	3.40836	69	3.40836	66	3.40836	62	3.40836	78	3.40836	79	3.40836	72	3.40836	77	3.40836	77	3.40836	69	3.40836	84	3.40836	70
3.42536	60	3.42536	74	3.42536	73	3.42536	65	3.42536	68	3.42536	77	3.42536	74	3.42536	69	3.42536	82	3.42536	82	3.42536	82	3.42536	82	3.42536	85
3.44236	58	3.44236	58	3.44236	65	3.44236	71	3.44236	61	3.44236	90	3.44236	81	3.44236	56	3.44236	82	3.44236	82	3.44236	77	3.44236	75	3.44236	79
3.45936	64	3.45936	67	3.45936	60	3.45936	77	3.45936	65	3.45936	77	3.45936	67	3.45936	68	3.45936	74	3.45936	74	3.45936	74	3.45936	79	3.45936	82
3.47636	47	3.47636	59	3.47636	68	3.47636	64	3.47636	77	3.47636	78	3.47636	77	3.47636	56	3.47636	74	3.47636	74	3.47636	77	3.47636	60	3.47636	86
3.49336	61	3.49336	57	3.49336	70	3.49336	78	3.49336	79	3.49336	67	3.49336	63	3.49336	69	3.49336	78	3.49336	78	3.49336	68	3.49336	64	3.49336	71
3.51036	51	3.51036	67	3.51036	58	3.51036	63	3.51036	68	3.51036	73	3.51036	80	3.51036	58	3.51036	77	3.51036	77	3.51036	81	3.51036	88	3.51036	64
3.52736	61	3.52736	75	3.52736	56	3.52736	66	3.52736	65	3.52736	66	3.52736	82	3.52736	59	3.52736	68	3.52736	68	3.52736	60	3.52736	80	3.52736	89
3.54436	71	3.54436	66	3.54436	51	3.54436	76	3.54436	65	3.54436	72	3.54436	84	3.54436	68	3.54436	67	3.54436	67	3.54436	66	3.54436	69	3.54436	83
3.56136	61	3.56136	61	3.56136	57	3.56136	72	3.56136	71	3.56136	68	3.56136	69	3.56136	72	3.56136	62	3.56136	62	3.56136	61	3.56136	59	3.56136	75
3.57836	64	3.57836	68	3.57836	60	3.57836	78	3.57836	78	3.57836	60	3.57836	82	3.57836	70	3.57836	78	3.57836	78	3.57836	67	3.57836	76	3.57836	71
3.59536	60	3.59536	85	3.59536	66	3.59536	78	3.59536	66	3.59536	69	3.59536	64	3.59536	71	3.59536	78	3.59536	78	3.59536	67	3.59536	73	3.59536	69
3.61236	56	3.61236	63	3.61236	59	3.61236	76	3.61236	63	3.61236	69	3.61236	80	3.61236	59	3.61236	59	3.61236	59	3.61236	59	3.61236	70	3.61236	67
3.62936	58	3.62936	65	3.62936	65	3.62936	69	3.62936	79	3.62936	66	3.62936	61	3.62936	71	3.62936	69	3.62936	69	3.62936	66	3.62936	81	3.62936	63
3.64636	59	3.64636	65	3.64636	71	3.64636	69	3.64636	54	3.64636	50	3.64636	65	3.64636	56	3.64636	78	3.64636	78	3.64636	69	3.64636	75	3.64636	83
3.66336	54	3.66336	60	3.66336	66	3.66336	62	3.66336	52	3.66336	60	3.66336	60	3.66336	79	3.66336	82	3.66336	82	3.66336	62	3.66336	65	3.66336	71
3.68036	68	3.68036	71	3.68036	76	3.68036	72	3.68036	73	3.68036	61	3.68036	73	3.68036	61	3.68036	68	3.68036	68	3.68036	65	3.68036	82	3.68036	74
3.69736	60	3.69736	60	3.69736	79	3.69736	73	3.69736	74	3.69736	66	3.69736	61	3.69736	61	3.69736	89	3.69736	89	3.69736	68	3.69736	68	3.69736	90
3.71436	59	3.71436	82	3.71436	55	3.71436	68	3.71436	54	3.71436	74	3.71436	71	3.71436	73	3.71436	76	3.71436	76	3.71436	64	3.71436	76	3.71436	87
3.73136	58	3.73136	76	3.73136	66	3.73136	43	3.73136	68	3.73136	61	3.73136	64	3.73136	43	3.73136	75	3.73136	75	3.73136	59	3.73136	71	3.73136	81
3.74836	61	3.74836	49	3.74836	78	3.74836	68	3.74836	78	3.74836	69	3.74836	60	3.74836	66	3.74836	84	3.74836	84	3.74836	61	3.74836	64	3.74836	76
3.76536	58	3.76536	67	3.76536	51	3.76536	65	3.76536	57	3.76536	70	3.76536	68	3.76536	61	3.76536	79	3.76536	79	3.76536	65	3.76536	86	3.76536	86
3.78236	65	3.78236	65	3.78236	67	3.78236	70	3.78236	61	3.78236	61	3.78236	73	3.78236	50	3.78236	83	3.78236	83	3.78236	73	3.78236	71	3.78236	69
3.79936	65	3.79936	61	3.79936	59	3.79936	60	3.79936	58	3.79936	68	3.79936	80	3.79936	59	3.79936	91	3.79936	91	3.79936	54	3.79936	73	3.79936	61
3.81636	63	3.81636	68	3.81636	51	3.81636	63	3.81636	75	3.81636	56	3.81636	54	3.81636	60	3.81636	75	3.81636	75	3.81636	67	3.81636	76	3.81636	60
3.83336	67	3.83336	65	3.83336	55	3.83336	60	3.83336	67	3.83336	57	3.83336	61	3.83336	60	3.83336	79	3.83336	79	3.83336	66	3.83336	78	3.83336	62
3.85036	56	3.85036	60	3.85036	51	3.85036	56	3.85036	65	3.85036	55	3.85036	80	3.85036	73	3.85036	75	3.85036	75	3.85036	65	3.85036	71	3.85036	67
3.86736	53	3.86736	67	3.86736	57	3.86736	59	3.86736	73	3.86736	67	3.86736	72	3.86736	53	3.86736	78	3.86736	78	3.86736	61	3.86736	73	3.86736	68
3.88436	85	3.88436	53	3.88436	74	3.88436	70	3.88436	59	3.88436	76	3.88436	71	3.88436	66	3.88436	80	3.88436	80	3.88436	69	3.88436	78	3.88436	79
3.90136	59	3.90136	65	3.90136	59	3.90136	69	3.90136	62	3.90136	65	3.90136	80	3.90136	66	3.90136	77	3.90136	77	3.90136	67	3.90136	70	3.90136	72
3.91836	69	3.91836	63	3.91836	67	3.91836	65	3.91836	60	3.91836	72	3.91836	78	3.91836	67	3.91836	77	3.91836	77	3.91836	58	3.91836	76	3.91836	71
3.93536	57	3.93536	59	3.93536	53	3.93536	62	3.93536	69	3.93536	63	3.93536	84	3.93536	61	3.93536	84	3.93536	84	3.93536	73	3.93536	61	3.93536	56
3.95236	71	3.95236	64	3.95236	61	3.95236	65	3.95236	69	3.95236	61	3.95236	80	3.95236	57	3.95236	83	3.95236	83	3.95236	70	3.95236	72	3.95236	73
3.96936	71	3.96936	77	3.96936	56	3.96936	55	3.96936	75	3.96936	61	3.96936	76	3.96936	67	3.96936	66	3.96936	66	3.96936	61	3.96936	67	3.96936	71
3.98636	50	3.98636	62	3.98636	67	3.98636	60	3.98636	66	3.98636	68	3.98636	62	3.98636	66	3.98636	67	3.98636	67	3.98636	64	3.98636	74	3.98636	65
4.00336	59	4.00336	67	4.00336	67	4.00336	57	4.00336	56	4.00336	74	4.00336	61	4.00336	66	4.00336	67	4.00336	67	4.00336	55	4.00336	68	4.00336	69
4.02036	63	4.02036	64	4.02036	62	4.02036	55	4.02036	66	4.02036	72	4.02036	79	4.02036	76	4.02036	66	4.02036	66	4.02036	62	4.02036	71	4.02036	73
4.03736	64	4.03736	58	4.03736	72	4.03736	59	4.03736	61	4.03736	69	4.03736	79	4.03736	79	4.03736	63	4.03736	63	4.03736	57	4.03736	73	4.03736	79
4.05436	66	4.05436	59	4.05436	74	4.05436	55	4.05436	74	4.05436	69	4.05436	73	4.05436	68	4.05436	81	4.05436	81	4.05436	69	4.05436	87	4.05436	72
4.07136	68	4.07136	57	4.07136	67	4.07136	53	4.07136	72	4.07136	67	4.07136	56	4.07136	56	4.07136	72	4.07136	72	4.07136	69	4.07136	87	4.07136	64
4.08836	63	4.08836	53	4.08836	54	4.08836	62	4.08836	67	4.08836	76	4.08836	58	4.08836	55	4.08836	76	4.08836	76	4.08836	58	4.08836	77	4.08836	73
4.10536	60	4.10536	62	4.10536	49	4.10536	71	4.10536	62	4.10536	77	4.10536	73	4.10536	63	4.10536	73	4.10536	73	4.10536	66	4.10536	72	4.10536	78
4.12236	58	4.12236	64	4.12236	60	4.12236	74	4.12236	61	4.12236	69	4.12236	67	4.12236	61	4.12236	72	4.12236	72	4.12236	70	4.12236	72	4.12236	60
4.13936	57	4.13936	58	4.13936	60	4.13936	63	4.13936	66	4.13936	69	4.13936	63	4.13936	65	4.13936	83	4.13936	83	4.13936	61	4.13936	71	4.13936	63
4.15636	60	4.15636	58	4.15636	58	4.15636	55	4.15636	62	4.15636	68	4.15636	61	4.15636	60	4.15636	76	4.15636	76	4.15636	71	4.15636	77	4.15636	71
4.17336	58	4.17336	55	4.17336	60	4.17336	60	4.17336	64	4.17336	58	4.17336	59	4.17336	55	4.17336	75	4.17336	75	4.17336	65	4.17336	77	4.17336	67
4.19036	56	4.19036	61	4.19036	57	4.19036	63	4.19036	64	4.19036	66	4.19036	61	4.19036	59	4.19036	63	4.19036	63	4.19036	55	4.19036	79	4.19036	71
4.20736	58	4.20736	59	4.20736	72	4.20736	59	4.20736	61	4.20736	76	4.20736	56	4.20736	64	4.20736	71	4.20736	71	4.20736	51	4.20736	73	4.20736	69
4.22436	58	4.22436	52	4.22436	76	4.22436	58	4.22436	57	4.22436	69	4.22436	68	4.22436	62	4.22436	78	4.22436	78	4.22436	62	4.22436	75	4.22436	65
4.24136	57	4.24136	64	4.24136	60	4.24136	63	4.24136	62	4.24136	67	4.24136	77	4.24136	61	4.24136	78	4.24136	78	4.24136	69	4.24136	78	4.24136	66
4.25836	61	4.25836	66	4.25836	61	4.25836	65	4.25836	67	4.25836	62	4.25836	73	4.25836	63	4.25836	80	4.25836	80	4.25836	64	4.25836	89	4.25836	66
4.27536	67	4.27536	62	4.27536	65	4.27536	65	4.27536	64	4.27536	60	4.27536	68	4.27536	71	4.27536	75	4.27536	75	4.27536	71	4.27536	85	4.27536	70
4.29236	60	4.29236	57	4.29236	60	4.29236	56	4.29236	61	4.29236	62	4.29236	75	4.29236	71	4.29236	74	4.29236	74	4.29236	56	4.29236	72	4.29236	73
4.30936	60	4.30936	61	4.30936	66	4.30936	56	4.30936	64	4.30936	61	4.30936	72	4.30936	64	4.30936	72	4.30936	72	4.30936	69	4.30936	69	4.30936	73
4.32636	63	4.32636	65	4.32636	64	4.32636	69	4.32636	66	4.32636	66	4.32636	60	4.32636	62	4.32636	76	4.32636	76	4.32636	71	4.32636	66	4.32636	67
4.34336	65	4.34336	61	4.34336	52	4.34336	62	4.34336	62	4.34336	61	4.34336	58	4.34336	57	4.34336	67	4.34336	67	4.34336	71	4.34336	70	4.34336	67
4.36036	61	4.36036	64	4.36036	54	4.36036	54	4.36036	59	4.36036	61	4.36036	65	4.36036	55	4.36036	74	4.36036	74	4.36036	66	4.36036	76	4.36036	63
4.37736	60	4.37736	66	4.37736	63	4.37736	63	4.37736	51	4.37736	69	4.37736	58	4.37736	61	4.37736	69	4.37736	69	4.37736	62	4.37736	73	4.37736	65
4.39436	54	4.39436	61	4.39436	57	4.39436	65	4.39436	59	4.39436	77	4.39436	66	4.39436	56	4.39436	72	4.39436	72	4.39436	64	4.39436	73	4.39436	69
4.41136	51	4.41136	59	4.41136	71	4.41136	70	4.41136	66	4.41136	77	4.41136	73	4.41136	62	4.41136	68	4.41136	68	4.41136	59	4.41136	81	4.41136	69
4.42836	66	4.42836	60	4.42836	70	4.42836	66	4.42836	63	4.42836	75	4.42836	75	4.42836	57	4.42836	65	4.42836	65	4.42836	48	4.42836	75	4.42836	63
4.44536	57	4.44536	56	4.44536	65	4.44536	52	4.44536	70	4.44536	67	4.44536	67	4.44536	52	4.44536	58	4.44536	58	4.44536	62	4.44536	60	4.44536	70
4.46236	68	4.46236	65	4.46236	61	4.46236	60	4.46236	64	4.46236	61	4.46236	58	4.46236	67	4.46236	55	4.46236	55	4.46236	47	4.46236	68	4.46236	67
4.47936	69	4.47936	61	4.47936	58	4.47936	59	4.47936	69	4.47936	65	4.47936	70	4.47936	70	4.47936	67	4.47936	67	4.47936	55	4.47936	67	4.47936	69
4.49636	62	4.49636	61	4.49636	64	4.49636	62	4.49636	68	4.49636	72	4.49636	60	4.49636	69	4.49636	63	4.49636	63	4.49636	70	4.49636	68	4.49636	73
4.51336	65	4.51336	56	4.51336	61	4.51336	61	4.51336	67	4.51336	63	4.51336	75	4.51336	54	4.51336	69	4.51336	69	4.51336	67	4.51336	74	4.51336	70
4.53036	58	4.53036	52	4.53036	63	4.53036	57	4.53036	66	4.53036	67	4.53036	59	4.53036	48	4.53036	69	4.53036	69	4.53036	77	4.53036	64	4.53036	49
4.54736	70	4.54736	58	4.54736	65	4.54736	66	4.54736	69	4.54736	61	4.54736	72	4.54736	50	4.54736	62	4.54736	62	4.54736	72	4.54736	70	4.54736	76
4.56436	59	4.56436	65	4.56436	63	4.56436	54	4.56436	73	4.56436	54	4.56436	75	4.56436	52	4.56436	66	4.56436	66	4.56436	68	4.56436	75	4.56436	72
4.58136	64	4.58136	69	4.58136	69	4.58136	51	4.58136	71	4.58136	69	4.58136	72	4.58136	57	4.58136	71	4.58136	71	4.58136	72	4.58136	71	4.58136	60
4.59836	79	4.59836	59	4.59836	61	4.59836	55	4.59836	62	4.59836	65	4.59836	53	4.59836	62	4.59836	54	4.59836	54	4.59836	66	4.59836	68	4.59836	65
4.61536	71	4.61536	55	4.61536	68	4.61536	73	4.61536	56	4.61536	44	4.61536	88	4.61536	66	4.61536	67	4.61536	67	4.61536	77	4.61536	66	4.61536	61
4.63236	53	4.63236	63	4.63236	51	4.63236	57	4.63236	74	4.63236	64	4.63236	57	4.63236	67	4.63236	67	4.63236	67	4.63236	62	4.63236	70	4.63236	68
4.64936	63	4.64936	57	4.64936	50	4.64936	55	4.64936	66	4.64936	69	4.64936	63	4.64936	64	4.64936	56	4.64936	56	4.64936	54	4.64936	71	4.64936	67
4.66636	58	4.66636	63	4.66636	45	4.66636	65	4.66636	66	4.66636	86	4.66636	72	4.66636	55	4.66636	71	4.66636	71	4.66636	66	4.66636	75	4.66636	58
4.68336	48	4.68336	64	4.68336	75	4.68336	76	4.68336	81	4.68336	61	4.68336	63	4.68336	53	4.68336	70	4.68336	70	4.68336	69	4.68336	70	4.68336	71
4.70036	57	4.70036	60	4.70036	64	4.70036	73	4.70036	54	4.70036	59	4.70036	56	4.70036	65	4.70036	66	4.70036	66	4.70036	86	4.70036	83	4.70036	55
4.71736	68	4.71736	54	4.71736	66	4.71736	54	4.71736	53	4.71736	73	4.71736	73	4.71736	61	4.71736	75	4.71736	75	4.71736	71	4.71736	70	4.71736	67
4.73436	57	4.73436	49	4.73436	61	4.73436	66	4.73436	60	4.73436	71	4.73436	49	4.73436	72	4.73436	65	4.73436	65	4.73436	67	4.73436	83	4.73436	68
4.75136	60	4.75136	56	4.75136	51	4.75136	67	4.75136	66	4.75136	66	4.75136	72	4.75136	52	4.75136	86	4.75136	86	4.75136	77	4.75136	74	4.75136	58
4.76836	53	4.76836	63	4.76836	61	4.76836	63	4.76836	55	4.76836	58	4.76836	76	4.76836	67	4.76836	71	4.76836	71	4.76836	58	4.76836	61	4.76836	66
4.78536	67	4.78536	66	4.78536	54	4.78536	68	4.78536	58	4.78536	76	4.78536	72	4.78536	68	4.78536	79	4.78536	79	4.78536	69	4.78536	81	4.78536	71
4.80236	64	4.80236	74	4.80236	51	4.80236	53	4.80236	63	4.80236	70	4.80236	71	4.80236	52	4.80236	73	4.80236	73	4.80236	72	4.80236	84	4.80236	72
4.81936	58	4.81936	72	4.81936	64	4.81936	61	4.81936	57	4.81936	73	4.81936	61	4.81936	55	4.81936	64	4.81936	64	4.81936	62	4.81936	62	4.81936	59
4.83636	49	4.83636	63	4.83636	60	4.83636	66	4.83636	62	4.83636	63	4.83636	63	4.83636	58	4.83636	74	4.83636	74	4.83636	59	4.83636	73	4.83636	69
4.85336	58	4.85336	58	4.85336	60	4.85336	66	4.85336	78	4.85336	61	4.85336	62	4.85336	55	4.85336	60	4.85336	60	4.85336	69	4.85336	80	4.85336	60
4.87036	74	4.87036	47	4.87036	57	4.87036	59	4.87036	55	4.87036	68	4.87036	69	4.87036	57	4.87036	71	4.87036	71	4.87036	69	4.87036	73	4.87036	67
4.88736	54	4.88736	60	4.88736	60	4.88736	66	4.88736	63	4.88736	75	4.88736	55	4.88736	63	4.88736	62	4.88736	62	4.88736	65	4.88736	72	4.88736	80
4.90436	50	4.90436	65	4.90436	65	4.90436	58	4.90436	74	4.90436	79	4.90436	66	4.90436	57	4.90436	75	4.90436	75	4.90436	62	4.90436	72	4.90436	69
4.92136	55	4.92136	57	4.92136	44	4.92136	63	4.92136	53	4.92136	56	4.92136	65	4.92136	53	4.92136	56	4.92136	56	4.92136	60	4.92136	73	4.92136	71
4.93836	56	4.93836	58	4.93836	57	4.93836	71	4.93836	49	4.93836	70	4.93836	56	4.93836	58	4.93836	57	4.93836	57	4.93836	61	4.93836	78	4.93836	80
4.95536	55	4.95536	57	4.95536	55	4.95536	63	4.95536	66	4.95536	65	4.95536	54	4.95536	68	4.95536	58	4.95536	58	4.95536	73	4.95536	77	4.95536	66
4.97236	54	4.97236	69	4.97236	49	4.97236	50	4.97236	75	4.97236	61	4.97236	65	4.97236	65	4.97236	59	4.97236	59	4.97236	81	4.97236	77	4.97236	54
4.98936	58	4.98936	57	4.98936	48	4.98936	48	4.98936	56	4.98936	65	4.98936	68	4.98936	65	4.98936	76	4.98936	76	4.98936	58	4.98936	70	4.98936	63
5.00636	70	5.00636	57	5.00636	54	5.00636	62	5.00636	60	5.00636	72	5.00636	72	5.00636	58	5.00636	65	5.00636	65	5.00636	57	5.00636	71	5.00636	71
5.02336	66	5.02336	50	5.02336	58	5.02336	69	5.02336	65	5.02336	76	5.02336	60	5.02336	49	5.02336	57	5.02336	57	5.02336	67	5.02336	78	5.02336	66
5.04036	56	5.04036	52	5.04036	62	5.04036	60	5.04036	70	5.04036	62	5.04036	52	5.04036	59	5.04036	63	5.04036	63	5.04036	64	5.04036	72	5.04036	68
5.05736	51	5.05736	63	5.05736	66	5.05736	59	5.05736	67	5.05736	67	5.05736	61	5.05736	60	5.05736	75	5.05736	75	5.05736	67	5.05736	71	5.05736	76
5.07436	59	5.07436	72	5.07436	59	5.07436	56	5.07436	68	5.07436	63	5.07436	64	5.07436	64	5.07436	79	5.07436	79	5.07436	71	5.07436	71	5.07436	82
5.09136	67	5.09136	71	5.09136	57	5.09136	56	5.09136	76	5.09136	80	5.09136	65	5.09136	61	5.09136	74	5.09136	74	5.09136	69	5.09136	65	5.09136	74
5.10836	56	5.10836	65	5.10836	62	5.10836	60	5.10836	70	5.10836	73	5.10836	54	5.10836	59	5.10836	74	5.10836	74	5.10836	57	5.10836	70	5.10836	68
5.12536	59	5.12536	59	5.12536	58	5.12536	58	5.12536	80	5.12536	67	5.12536	58	5.12536	66	5.12536	70	5.12536	70	5.12536	58	5.12536	76	5.12536	77
5.14236	60	5.14236	60	5.14236	65	5.14236	54	5.14236	68	5.14236	70	5.14236	62	5.14236	66	5.14236	76	5.14236	76	5.14236	65	5.14236	64	5.14236	74
5.15936	61	5.15936	65	5.15936	62	5.15936	58	5.15936	56	5.15936	65	5.15936	58	5.15936	65	5.15936	70	5.15936	70	5.15936	67	5.15936	51	5.15936	67
5.17636	55	5.17636	58	5.17636	53	5.17636	67	5.17636	61	5.17636	57	5.17636	62	5.17636	62	5.17636	70	5.17636	70	5.17636	60	5.17636	62	5.17636	69
5.19336	45	5.19336	55	5.19336	60	5.19336	67	5.19336	62	5.19336	55	5.19336	62	5.19336	59	5.19336	67	5.19336	67	5.19336	64	5.19336	71	5.19336	64
5.21036	57	5.21036	50	5.21036	60	5.21036	68	5.21036	58	5.21036	56	5.21036	67	5.21036	63	5.21036	55	5.21036	55	5.21036	71	5.21036	75	5.21036	67
5.22736	63	5.22736	51	5.22736	59	5.22736	64	5.22736	62	5.22736	63	5.22736	69	5.22736	64	5.22736	55	5.22736	55	5.22736	64	5.22736	74	5.22736	74
5.24436	64	5.24436	57	5.24436	62	5.24436	62	5.24436	59	5.24436	67	5.24436	65	5.24436	64	5.24436	66	5.24436	66	5.24436	65	5.24436	72	5.24436	66
5.26136	60	5.26136	63	5.26136	57	5.26136	66	5.26136	62	5.26136	69	5.26136	62	5.26136	65	5.26136	80	5.26136	80	5.26136	69	5.26136	81	5.26136	66
5.27836	58	5.27836	62	5.27836	52	5.27836	63	5.27836	54	5.27836	68	5.27836	68	5.27836	67	5.27836	89	5.27836	89	5.27836	69	5.27836	76	5.27836	71
5.29536	60	5.29536	56	5.29536	56	5.29536	61	5.29536	55	5.29536	58	5.29536	74	5.29536	59	5.29536	75	5.29536	75	5.29536	60	5.29536	67	5.29536	75
5.31236	56	5.31236	48	5.31236	59	5.31236	65	5.31236	51	5.31236	49	5.31236	69	5.31236	54	5.31236	73	5.31236	73	5.31236	62	5.31236	69	5.31236	74
5.32936	61	5.32936	48	5.32936	65	5.32936	61	5.32936	58	5.32936	55	5.32936	64	5.32936	49	5.32936	66	5.32936	66	5.32936	69	5.32936	79	5.32936	75
5.34636	53	5.34636	61	5.34636	58	5.34636	58	5.34636	65	5.34636	58	5.34636	64	5.34636	58	5.34636	71	5.34636	71	5.34636	73	5.34636	78	5.34636	72
5.36336	45	5.36336	60	5.36336	73	5.36336	63	5.36336	64	5.36336	70	5.36336	80	5.36336	60	5.36336	74	5.36336	74	5.36336	73	5.36336	70	5.36336	61
5.38036	62	5.38036	52	5.38036	63	5.38036	53	5.38036	64	5.38036	66	5.38036	72	5.38036	69	5.38036	72	5.38036	72	5.38036	66	5.38036	79	5.38036	57
5.39736	55	5.39736	46	5.39736	55	5.39736	55	5.39736	56	5.39736	60	5.39736	59	5.39736	60	5.39736	83	5.39736	83	5.39736	73	5.39736	77	5.39736	78
5.41436	51	5.41436	53	5.41436	81	5.41436	56	5.41436	60	5.41436	65	5.41436	72	5.41436	50	5.41436	84	5.41436	84	5.41436	71	5.41436	83	5.41436	71
5.43136	49	5.43136	60	5.43136	66	5.43136	49	5.43136	70	5.43136	78	5.43136	63	5.43136	56	5.43136	80	5.43136	80	5.43136	76	5.43136	84	5.43136	68
5.44836	55	5.44836	62	5.44836	65	5.44836	68	5.44836	62	5.44836	73	5.44836	68	5.44836	68	5.44836	66	5.44836	66	5.44836	68	5.44836	74	5.44836	80
5.46536	60	5.46536	53	5.46536	55	5.46536	67	5.46536	71	5.46536	65	5.46536	63	5.46536	68	5.46536	83	5.46536	83	5.46536	72	5.46536	69	5.46536	71
5.48236	73	5.48236	53	5.48236	64	5.48236	56	5.48236	68	5.48236	61	5.48236	74	5.48236	55	5.48236	85	5.48236	85	5.48236	71	5.48236	74	5.48236	62
5.49936	63	5.49936	51	5.49936	65	5.49936	61	5.49936	76	5.49936	70	5.49936	62	5.49936	58	5.49936	81	5.49936	81	5.49936	60	5.49936	74	5.49936	71
5.51636	58	5.51636	55	5.51636	63	5.51636	71	5.51636	64	5.51636	59	5.51636	55	5.51636	66	5.51636	68	5.51636	68	5.51636	60	5.51636	54	5.51636	60
5.53336	66	5.53336	65	5.53336	67	5.53336	60	5.53336	71	5.53336	53	5.53336	58	5.53336	62	5.53336	61	5.53336	61	5.53336	71	5.53336	75	5.53336	62
5.55036	64	5.55036	56	5.55036	67	5.55036	66	5.55036	76	5.55036	54	5.55036	80	5.55036	64	5.55036	82	5.55036	82	5.55036	65	5.55036	81	5.55036	67
5.56736	58	5.56736	48	5.56736	67	5.56736	59	5.56736	65	5.56736	71	5.56736	72	5.56736	68	5.56736	74	5.56736	74	5.56736	76	5.56736	77	5.56736	66
5.58436	63	5.58436	53	5.58436	60	5.58436	61	5.58436	52	5.58436	66	5.58436	66	5.58436	71	5.58436	81	5.58436	81	5.58436	65	5.58436	59	5.58436	78
5.60136	65	5.60136	59	5.60136	66	5.60136	61	5.60136	52	5.60136	67	5.60136	58	5.60136	53	5.60136	67	5.60136	67	5.60136	72	5.60136	78	5.60136	80
5.61836	47	5.61836	61	5.61836	58	5.61836	64	5.61836	74	5.61836	52	5.61836	61	5.61836	60	5.61836	61	5.61836	61	5.61836	64	5.61836	72	5.61836	87
5.63536	55	5.63536	73	5.63536	54	5.63536	63	5.63536	71	5.63536	54	5.63536	69	5.63536	71	5.63536	71	5.63536	71	5.63536	61	5.63536	80	5.63536	66
5.65236	54	5.65236	59	5.65236	69	5.65236	60	5.65236	60	5.65236	57	5.65236	66	5.65236	61	5.65236	68	5.65236	68	5.65236	68	5.65236	70	5.65236	51
5.66936	60	5.66936	60	5.66936	64	5.66936	58	5.66936	64	5.66936	58	5.66936	65	5.66936	57	5.66936	82	5.66936	82	5.66936	72	5.66936	69	5.66936	78
5.68636	60	5.68636	68	5.68636	51	5.68636	60	5.68636	52	5.68636	58	5.68636	71	5.68636	60	5.68636	70	5.68636	70	5.68636	80	5.68636	78	5.68636	76
5.70336	73	5.70336	66	5.70336	80	5.70336	54	5.70336	83	5.70336	64	5.70336	79	5.70336	66	5.70336	83	5.70336	83	5.70336	56	5.70336	74	5.70336	85
5.72036	56	5.72036	61	5.72036	63	5.72036	45	5.72036	55	5.72036	67	5.72036	63	5.72036	59	5.72036	64	5.72036	64	5.72036	75	5.72036	72	5.72036	79
5.73736	63	5.73736	58	5.73736	66	5.73736	61	5.73736	67	5.73736	69	5.73736	70	5.73736	66	5.73736	75	5.73736	75	5.73736	80	5.73736	68	5.73736	71
5.75436	72	5.75436	55	5.75436	58	5.75436	68	5.75436	72	5.75436	55	5.75436	61	5.75436	77	5.75436	73	5.75436	73	5.75436	55	5.75436	55	5.75436	65
5.77136	65	5.77136	71	5.77136	71	5.77136	54	5.77136	65	5.77136	61	5.77136	70	5.77136	50	5.77136	87	5.77136	87	5.77136	75	5.77136	78	5.77136	75
5.78836	71	5.78836	55	5.78836	54	5.78836	57	5.78836	68	5.78836	62	5.78836	43	5.78836	64	5.78836	68	5.78836	68	5.78836	65	5.78836	74	5.78836	87
5.80536	58	5.80536	68	5.80536	58	5.80536	52	5.80536	65	5.80536	66	5.80536	75	5.80536	76	5.80536	74	5.80536	74	5.80536	72	5.80536	69	5.80536	81
5.82236	55	5.82236	70	5.82236	66	5.82236	56	5.82236	65	5.82236	58	5.82236	83	5.82236	81	5.82236	75	5.82236	75	5.82236	62	5.82236	86	5.82236	86
5.83936	64	5.83936	59	5.83936	80	5.83936	69	5.83936	55	5.83936	67	5.83936	72	5.83936	67	5.83936	82	5.83936	82	5.83936	76	5.83936	70	5.83936	68
5.85636	56	5.85636	55	5.85636	65	5.85636	81	5.85636	68	5.85636	68	5.85636	69	5.85636	71	5.85636	83	5.85636	83	5.85636	78	5.85636	70	5.85636	69
5.87336	59	5.87336	54	5.87336	55	5.87336	63	5.87336	82	5.87336	58	5.87336	62	5.87336	77	5.87336	82	5.87336	82	5.87336	73	5.87336	67	5.87336	71
5.89036	61	5.89036	63	5.89036	62	5.89036	62	5.89036	73	5.89036	78	5.89036	61	5.89036	72	5.89036	66	5.89036	66	5.89036	74	5.89036	65	5.89036	72
5.90736	64	5.90736	65	5.90736	61	5.90736	67	5.90736	66	5.90736	66	5.90736	70	5.90736	66	5.90736	77	5.90736	77	5.90736	69	5.90736	81	5.90736	82
5.92436	61	5.92436	65	5.92436	63	5.92436	63	5.92436	71	5.92436	58	5.92436	62	5.92436	68	5.92436	81	5.92436	81	5.92436	74	5.92436	74	5.92436	71
5.94136	55	5.94136	66	5.94136	60	5.94136	59	5.94136	74	5.94136	57	5.94136	77	5.94136	65	5.94136	66	5.94136	66	5.94136	79	5.94136	77	5.94136	74
5.95836	66	5.95836	79	5.95836	60	5.95836	52	5.95836	77	5.95836	52	5.95836	82	5.95836	66	5.95836	72	5.95836	72	5.95836	92	5.95836	72	5.95836	62
5.97536	72	5.97536	68	5.97536	63	5.97536	59	5.97536	63	5.97536	69	5.97536	70	5.97536	68	5.97536	82	5.97536	82	5.97536	72	5.97536	74	5.97536	70
5.99236	50	5.99236	67	5.99236	58	5.99236	75	5.99236	59	5.99236	84	5.99236	58	5.99236	68	5.99236	82	5.99236	82	5.99236	86	5.99236	73	5.99236	71
6.00936	54	6.00936	70	6.00936	56	6.00936	74	6.00936	59	6.00936	68	6.00936	75	6.00936	74	6.00936	65	6.00936	65	6.00936	80	6.00936	94	6.00936	85
6.02636	66	6.02636	64	6.02636	64	6.02636	68	6.02636	59	6.02636	74	6.02636	73	6.02636	71	6.02636	61	6.02636	61	6.02636	69	6.02636	87	6.02636	78
6.04336	66	6.04336	68	6.04336	63	6.04336	69	6.04336	64	6.04336	79	6.04336	75	6.04336	73	6.04336	66	6.04336	66	6.04336	62	6.04336	84	6.04336	75
6.06036	72	6.06036	61	6.06036	62	6.06036	67	6.06036	69	6.06036	65	6.06036	69	6.06036	71	6.06036	74	6.06036	74	6.06036	62	6.06036	81	6.06036	84
6.07736	71	6.07736	62	6.07736	63	6.07736	69	6.07736	69	6.07736	70	6.07736	73	6.07736	66	6.07736	64	6.07736	64	6.07736	65	6.07736	80	6.07736	72
6.09436	77	6.09436	61	6.09436	66	6.09436	63	6.09436	76	6.09436	74	6.09436	80	6.09436	59	6.09436	77	6.09436	77	6.09436	55	6.09436	82	6.09436	65
6.11136	73	6.11136	67	6.11136	60	6.11136	59	6.11136	81	6.11136	74	6.11136	82	6.11136	70	6.11136	80	6.11136	80	6.11136	62	6.11136	91	6.11136	76
6.12836	66	6.12836	76	6.12836	59	6.12836	52	6.12836	75	6.12836	72	6.12836	79	6.12836	75	6.12836	76	6.12836	76	6.12836	76	6.12836	80	6.12836	81
6.14536	66	6.14536	81	6.14536	68	6.14536	62	6.14536	56	6.14536	70	6.14536	79	6.14536	70	6.14536	86	6.14536	86	6.14536	73	6.14536	87	6.14536	84
6.16236	69	6.16236	71	6.16236	69	6.16236	72	6.16236	68	6.16236	77	6.16236	75	6.16236	78	6.16236	77	6.16236	77	6.16236	72	6.16236	87	6.16236	82
6.17936	74	6.17936	75	6.17936	70	6.17936	71	6.17936	80	6.17936	87	6.17936	78	6.17936	86	6.17936	70	6.17936	70	6.17936	75	6.17936	94	6.17936	75
6.19636	75	6.19636	76	6.19636	70	6.19636	68	6.19636	77	6.19636	87	6.19636	72	6.19636	75	6.19636	82	6.19636	82	6.19636	82	6.19636	90	6.19636	79
6.21336	69	6.21336	69	6.21336	80	6.21336	77	6.21336	74	6.21336	76	6.21336	70	6.21336	73	6.21336	83	6.21336	83	6.21336	80	6.21336	79	6.21336	96
6.23036	76	6.23036	74	6.23036	87	6.23036	84	6.23036	70	6.23036	82	6.23036	88	6.23036	82	6.23036	95	6.23036	95	6.23036	91	6.23036	92	6.23036	101
6.24736	73	6.24736	80	6.24736	84	6.24736	83	6.24736	87	6.24736	94	6.24736	107	6.24736	90	6.24736	96	6.24736	96	6.24736	91	6.24736	100	6.24736	101
6.26436	87	6.26436	79	6.26436	79	6.26436	83	6.26436	110	6.26436	96	6.26436	102	6.26436	93	6.26436	98	6.26436	98	6.26436	98	6.26436	106	6.26436	105
6.28136	93	6.28136	82	6.28136	78	6.28136	85	6.28136	104	6.28136	91	6.28136	98	6.28136	79	6.28136	96	6.28136	96	6.28136	95	6.28136	101	6.28136	109
6.29836	80	6.29836	78	6.29836	96	6.29836	97	6.29836	104	6.29836	80	6.29836	88	6.29836	75	6.29836	89	6.29836	89	6.29836	74	6.29836	93	6.29836	91
6.31536	80	6.31536	73	6.31536	90	6.31536	89	6.31536	95	6.31536	79	6.31536	80	6.31536	66	6.31536	85	6.31536	85	6.31536	71	6.31536	81	6.31536	78
6.33236	67	6.33236	70	6.33236	73	6.33236	74	6.33236	75	6.33236	75	6.33236	78	6.33236	48	6.33236	83	6.33236	83	6.33236	75	6.33236	64	6.33236	81
6.34936	66	6.34936	65	6.34936	61	6.34936	71	6.34936	69	6.34936	72	6.34936	87	6.34936	64	6.34936	85	6.34936	85	6.34936	70	6.34936	77	6.34936	91
6.36636	70	6.36636	68	6.36636	62	6.36636	71	6.36636	72	6.36636	75	6.36636	70	6.36636	65	6.36636	76	6.36636	76	6.36636	69	6.36636	89	6.36636	82
6.38336	69	6.38336	67	6.38336	66	6.38336	62	6.38336	66	6.38336	63	6.38336	66	6.38336	59	6.38336	76	6.38336	76	6.38336	69	6.38336	80	6.38336	92
6.40036	58	6.40036	73	6.40036	60	6.40036	68	6.40036	66	6.40036	59	6.40036	75	6.40036	64	6.40036	87	6.40036	87	6.40036	79	6.40036	73	6.40036	83
6.41736	74	6.41736	69	6.41736	58	6.41736	86	6.41736	68	6.41736	59	6.41736	71	6.41736	70	6.41736	83	6.41736	83	6.41736	80	6.41736	68	6.41736	80
6.43436	64	6.43436	64	6.43436	60	6.43436	71	6.43436	66	6.43436	63	6.43436	70	6.43436	67	6.43436	66	6.43436	66	6.43436	71	6.43436	80	6.43436	85
6.45136	51	6.45136	56	6.45136	48	6.45136	67	6.45136	75	6.45136	72	6.45136	72	6.45136	78	6.45136	75	6.45136	75	6.45136	66	6.45136	88	6.45136	84
6.46836	61	6.46836	66	6.46836	54	6.46836	66	6.46836	74	6.46836	67	6.46836	80	6.46836	76	6.46836	73	6.46836	73	6.46836	71	6.46836	83	6.46836	75
6.48536	64	6.48536	59	6.48536	54	6.48536	59	6.48536	70	6.48536	68	6.48536	88	6.48536	64	6.48536	68	6.48536	68	6.48536	66	6.48536	81	6.48536	81
6.50236	64	6.50236	58	6.50236	65	6.50236	72	6.50236	71	6.50236	73	6.50236	70	6.50236	67	6.50236	81	6.50236	81	6.50236	72	6.50236	77	6.50236	70
6.51936	61	6.51936	66	6.51936	71	6.51936	74	6.51936	78	6.51936	57	6.51936	60	6.51936	59	6.51936	64	6.51936	64	6.51936	77	6.51936	76	6.51936	75
6.53636	58	6.53636	55	6.53636	67	6.53636	74	6.53636	52	6.53636	69	6.53636	82	6.53636	77	6.53636	69	6.53636	69	6.53636	74	6.53636	70	6.53636	73
6.55336	47	6.55336	54	6.55336	57	6.55336	59	6.55336	65	6.55336	71	6.55336	83	6.55336	82	6.55336	72	6.55336	72	6.55336	68	6.55336	82	6.55336	70
6.57036	71	6.57036	70	6.57036	70	6.57036	71	6.57036	58	6.57036	69	6.57036	69	6.57036	77	6.57036	83	6.57036	83	6.57036	74	6.57036	80	6.57036	67
6.58736	62	6.58736	51	6.58736	64	6.58736	70	6.58736	64	6.58736	69	6.58736	71	6.58736	58	6.58736	70	6.58736	70	6.58736	62	6.58736	79	6.58736	72
6.60436	74	6.60436	66	6.60436	56	6.60436	64	6.60436	58	6.60436	63	6.60436	75	6.60436	74	6.60436	81	6.60436	81	6.60436	85	6.60436	83	6.60436	82
6.62136	57	6.62136	59	6.62136	69	6.62136	55	6.62136	64	6.62136	57	6.62136	73	6.62136	81	6.62136	86	6.62136	86	6.62136	84	6.62136	70	6.62136	81
6.63836	72	6.63836	53	6.63836	69	6.63836	77	6.63836	72	6.63836	64	6.63836	90	6.63836	58	6.63836	81	6.63836	81	6.63836	68	6.63836	81	6.63836	73
6.65536	64	6.65536	70	6.65536	64	6.65536	61	6.65536	68	6.65536	83	6.65536	76	6.65536	76	6.65536	97	6.65536	97	6.65536	67	6.65536	68	6.65536	90
6.67236	73	6.67236	94	6.67236	75	6.67236	61	6.67236	70	6.67236	81	6.67236	90	6.67236	64	6.67236	67	6.67236	67	6.67236	90	6.67236	70	6.67236	88
6.68936	53	6.68936	65	6.68936	66	6.68936	72	6.68936	70	6.68936	79	6.68936	83	6.68936	69	6.68936	73	6.68936	73	6.68936	72	6.68936	78	6.68936	74
6.70636	60	6.70636	65	6.70636	71	6.70636	63	6.70636	73	6.70636	55	6.70636	92	6.70636	58	6.70636	76	6.70636	76	6.70636	58	6.70636	74	6.70636	82
6.72336	51	6.72336	72	6.72336	67	6.72336	52	6.72336	71	6.72336	69	6.72336	93	6.72336	86	6.72336	79	6.72336	79	6.72336	75	6.72336	80	6.72336	78
6.74036	61	6.74036	59	6.74036	58	6.74036	68	6.74036	74	6.74036	58	6.74036	74	6.74036	84	6.74036	91	6.74036	91	6.74036	69	6.74036	94	6.74036	70
6.75736	70	6.75736	79	6.75736	85	6.75736	60	6.75736	65	6.75736	75	6.75736	87	6.75736	79	6.75736	91	6.75736	91	6.75736	88	6.75736	99	6.75736	84
6.77436	70	6.77436	65	6.77436	81	6.77436	61	6.77436	59	6.77436	80	6.77436	75	6.77436	74	6.77436	78	6.77436	78	6.77436	81	6.77436	74	6.77436	81
6.79136	65	6.79136	74	6.79136	63	6.79136	75	6.79136	77	6.79136	72	6.79136	70	6.79136	71	6.79136	77	6.79136	77	6.79136	76	6.79136	57	6.79136	67
6.80836	75	6.80836	71	6.80836	59	6.80836	73	6.80836	86	6.80836	60	6.80836	69	6.80836	65	6.80836	82	6.80836	82	6.80836	77	6.80836	68	6.80836	86
6.82536	68	6.82536	65	6.82536	62	6.82536	60	6.82536	66	6.82536	67	6.82536	78	6.82536	74	6.82536	90	6.82536	90	6.82536	74	6.82536	67	6.82536	76
6.84236	77	6.84236	59	6.84236	57	6.84236	67	6.84236	77	6.84236	71	6.84236	72	6.84236	76	6.84236	80	6.84236	80	6.84236	74	6.84236	86	6.84236	89
6.85936	61	6.85936	77	6.85936	55	6.85936	69	6.85936	83	6.85936	82	6.85936	85	6.85936	80	6.85936	96	6.85936	96	6.85936	91	6.85936	79	6.85936	80
6.87636	54	6.87636	64	6.87636	64	6.87636	69	6.87636	79	6.87636	82	6.87636	82	6.87636	71	6.87636	74	6.87636	74	6.87636	85	6.87636	76	6.87636	73
6.89336	60	6.89336	75	6.89336	86	6.89336	80	6.89336	65	6.89336	74	6.89336	75	6.89336	77	6.89336	62	6.89336	62	6.89336	81	6.89336	93	6.89336	92
6.91036	61	6.91036	79	6.91036	72	6.91036	82	6.91036	77	6.91036	73	6.91036	71	6.91036	72	6.91036	79	6.91036	79	6.91036	72	6.91036	81	6.91036	101
6.92736	55	6.92736	77	6.92736	69	6.92736	71	6.92736	69	6.92736	87	6.92736	62	6.92736	69	6.92736	68	6.92736	68	6.92736	73	6.92736	75	6.92736	94
6.94436	61	6.94436	55	6.94436	68	6.94436	72	6.94436	62	6.94436	83	6.94436	69	6.94436	69	6.94436	72	6.94436	72	6.94436	77	6.94436	76	6.94436	78
6.96136	70	6.96136	56	6.96136	74	6.96136	79	6.96136	70	6.96136	66	6.96136	78	6.96136	70	6.96136	80	6.96136	80	6.96136	71	6.96136	87	6.96136	95
6.97836	66	6.97836	59	6.97836	77	6.97836	73	6.97836	71	6.97836	71	6.97836	76	6.97836	71	6.97836	90	6.97836	90	6.97836	73	6.97836	89	6.97836	76
6.99536	64	6.99536	62	6.99536	59	6.99536	76	6.99536	69	6.99536	74	6.99536	69	6.99536	76	6.99536	86	6.99536	86	6.99536	82	6.99536	75	6.99536	83
7.01236	62	7.01236	70	7.01236	63	7.01236	78	7.01236	73	7.01236	71	7.01236	71	7.01236	74	7.01236	89	7.01236	89	7.01236	72	7.01236	75	7.01236	81
7.02936	65	7.02936	64	7.02936	69	7.02936	74	7.02936	76	7.02936	83	7.02936	83	7.02936	72	7.02936	88	7.02936	88	7.02936	76	7.02936	87	7.02936	71
7.04636	64	7.04636	55	7.04636	67	7.04636	70	7.04636	71	7.04636	77	7.04636	84	7.04636	76	7.04636	75	7.04636	75	7.04636	89	7.04636	86	7.04636	77
7.06336	59	7.06336	61	7.06336	68	7.06336	71	7.06336	64	7.06336	67	7.06336	77	7.06336	80	7.06336	78	7.06336	78	7.06336	84	7.06336	80	7.06336	86
7.08036	66	7.08036	72	7.08036	68	7.08036	72	7.08036	53	7.08036	75	7.08036	70	7.08036	71	7.08036	80	7.08036	80	7.08036	84	7.08036	68	7.08036	81
7.09736	71	7.09736	71	7.09736	71	7.09736	70	7.09736	60	7.09736	84	7.09736	68	7.09736	62	7.09736	83	7.09736	83	7.09736	83	7.09736	75	7.09736	82
7.11436	70	7.11436	58	7.11436	80	7.11436	77	7.11436	73	7.11436	83	7.11436	68	7.11436	68	7.11436	72	7.11436	72	7.11436	77	7.11436	88	7.11436	75
7.13136	71	7.13136	61	7.13136	72	7.13136	74	7.13136	83	7.13136	76	7.13136	61	7.13136	72	7.13136	69	7.13136	69	7.13136	76	7.13136	88	7.13136	82
7.14836	63	7.14836	70	7.14836	66	7.14836	79	7.14836	77	7.14836	73	7.14836	66	7.14836	66	7.14836	82	7.14836	82	7.14836	79	7.14836	85	7.14836	96
7.16536	66	7.16536	66	7.16536	62	7.16536	72	7.16536	65	7.16536	66	7.16536	80	7.16536	66	7.16536	86	7.16536	86	7.16536	98	7.16536	80	7.16536	93
7.18236	62	7.18236	58	7.18236	71	7.18236	72	7.18236	79	7.18236	63	7.18236	75	7.18236	69	7.18236	77	7.18236	77	7.18236	89	7.18236	76	7.18236	91
7.19936	71	7.19936	56	7.19936	66	7.19936	85	7.19936	70	7.19936	59	7.19936	74	7.19936	68	7.19936	76	7.19936	76	7.19936	68	7.19936	84	7.19936	87
7.21636	76	7.21636	58	7.21636	57	7.21636	81	7.21636	66	7.21636	64	7.21636	80	7.21636	73	7.21636	86	7.21636	86	7.21636	73	7.21636	90	7.21636	76
7.23336	59	7.23336	59	7.23336	64	7.23336	70	7.23336	72	7.23336	68	7.23336	76	7.23336	78	7.23336	89	7.23336	89	7.23336	81	7.23336	82	7.23336	84
7.25036	65	7.25036	65	7.25036	76	7.25036	66	7.25036	77	7.25036	69	7.25036	68	7.25036	74	7.25036	77	7.25036	77	7.25036	75	7.25036	79	7.25036	93
7.26736	74	7.26736	62	7.26736	74	7.26736	70	7.26736	80	7.26736	71	7.26736	71	7.26736	76	7.26736	79	7.26736	79	7.26736	73	7.26736	87	7.26736	78
7.28436	70	7.28436	63	7.28436	64	7.28436	74	7.28436	76	7.28436	62	7.28436	75	7.28436	77	7.28436	88	7.28436	88	7.28436	80	7.28436	89	7.28436	77
7.30136	58	7.30136	73	7.30136	58	7.30136	67	7.30136	87	7.30136	67	7.30136	78	7.30136	67	7.30136	83	7.30136	83	7.30136	90	7.30136	85	7.30136	68
7.31836	58	7.31836	86	7.31836	68	7.31836	62	7.31836	70	7.31836	72	7.31836	82	7.31836	70	7.31836	70	7.31836	70	7.31836	82	7.31836	80	7.31836	66
7.33536	76	7.33536	76	7.33536	69	7.33536	71	7.33536	65	7.33536	74	7.33536	77	7.33536	69	7.33536	75	7.33536	75	7.33536	71	7.33536	81	7.33536	90
7.35236	71	7.35236	73	7.35236	67	7.35236	69	7.35236	79	7.35236	73	7.35236	88	7.35236	65	7.35236	81	7.35236	81	7.35236	82	7.35236	87	7.35236	87
7.36936	66	7.36936	69	7.36936	71	7.36936	53	7.36936	79	7.36936	63	7.36936	80	7.36936	68	7.36936	92	7.36936	92	7.36936	87	7.36936	76	7.36936	71
7.38636	73	7.38636	68	7.38636	86	7.38636	57	7.38636	74	7.38636	63	7.38636	64	7.38636	70	7.38636	89	7.38636	89	7.38636	96	7.38636	80	7.38636	79
7.40336	77	7.40336	71	7.40336	91	7.40336	57	7.40336	69	7.40336	69	7.40336	68	7.40336	55	7.40336	83	7.40336	83	7.40336	87	7.40336	78	7.40336	87
7.42036	69	7.42036	67	7.42036	77	7.42036	63	7.42036	76	7.42036	73	7.42036	90	7.42036	66	7.42036	74	7.42036	74	7.42036	65	7.42036	72	7.42036	76
7.43736	68	7.43736	58	7.43736	73	7.43736	73	7.43736	74	7.43736	79	7.43736	67	7.43736	66	7.43736	85	7.43736	85	7.43736	64	7.43736	78	7.43736	81
7.45436	66	7.45436	67	7.45436	84	7.45436	71	7.45436	68	7.45436	72	7.45436	72	7.45436	59	7.45436	85	7.45436	85	7.45436	89	7.45436	74	7.45436	77
7.47136	61	7.47136	76	7.47136	73	7.47136	80	7.47136	57	7.47136	73	7.47136	62	7.47136	63	7.47136	81	7.47136	81	7.47136	66	7.47136	81	7.47136	75
7.48836	67	7.48836	61	7.48836	68	7.48836	73	7.48836	65	7.48836	67	7.48836	65	7.48836	76	7.48836	73	7.48836	73	7.48836	75	7.48836	95	7.48836	83
7.50536	72	7.50536	62	7.50536	72	7.50536	71	7.50536	66	7.50536	79	7.50536	70	7.50536	79	7.50536	80	7.50536	80	7.50536	73	7.50536	83	7.50536	82
7.52236	61	7.52236	63	7.52236	56	7.52236	68	7.52236	72	7.52236	76	7.52236	77	7.52236	69	7.52236	101	7.52236	101	7.52236	87	7.52236	76	7.52236	67
7.53936	54	7.53936	78	7.53936	60	7.53936	53	7.53936	62	7.53936	74	7.53936	72	7.53936	66	7.53936	74	7.53936	74	7.53936	83	7.53936	76	7.53936	77
7.55636	56	7.55636	67	7.55636	76	7.55636	59	7.55636	86	7.55636	66	7.55636	83	7.55636	83	7.55636	81	7.55636	81	7.55636	74	7.55636	94	7.55636	86
7.57336	82	7.57336	75	7.57336	63	7.57336	63	7.57336	74	7.57336	78	7.57336	75	7.57336	57	7.57336	76	7.57336	76	7.57336	81	7.57336	87	7.57336	91
7.59036	74	7.59036	79	7.59036	60	7.59036	52	7.59036	72	7.59036	72	7.59036	80	7.59036	68	7.59036	83	7.59036	83	7.59036	76	7.59036	74	7.59036	83
7.60736	78	7.60736	79	7.60736	68	7.60736	65	7.60736	57	7.60736	79	7.60736	86	7.60736	75	7.60736	74	7.60736	74	7.60736	72	7.60736	88	7.60736	97
7.62436	86	7.62436	65	7.62436	59	7.62436	75	7.62436	68	7.62436	76	7.62436	58	7.62436	67	7.62436	85	7.62436	85	7.62436	80	7.62436	78	7.62436	82
7.64136	70	7.64136	58	7.64136	59	7.64136	66	7.64136	70	7.64136	67	7.64136	66	7.64136	67	7.64136	82	7.64136	82	7.64136	66	7.64136	86	7.64136	86
7.65836	67	7.65836	58	7.65836	81	7.65836	66	7.65836	57	7.65836	67	7.65836	79	7.65836	52	7.65836	82	7.65836	82	7.65836	74	7.65836	69	7.65836	75
7.67536	56	7.67536	61	7.67536	71	7.67536	63	7.67536	71	7.67536	73	7.67536	67	7.67536	72	7.67536	94	7.67536	94	7.67536	87	7.67536	67	7.67536	79
7.69236	57	7.69236	65	7.69236	73	7.69236	68	7.69236	72	7.69236	70	7.69236	64	7.69236	66	7.69236	99	7.69236	99	7.69236	68	7.69236	66	7.69236	73
7.70936	60	7.70936	69	7.70936	78	7.70936	80	7.70936	68	7.70936	52	7.70936	79	7.70936	63	7.70936	69	7.70936	69	7.70936	65	7.70936	71	7.70936	72
7.72636	61	7.72636	87	7.72636	73	7.72636	63	7.72636	53	7.72636	74	7.72636	61	7.72636	69	7.72636	78	7.72636	78	7.72636	73	7.72636	74	7.72636	71
7.74336	67	7.74336	60	7.74336	67	7.74336	54	7.74336	80	7.74336	67	7.74336	71	7.74336	66	7.74336	80	7.74336	80	7.74336	64	7.74336	78	7.74336	65
7.76036	67	7.76036	65	7.76036	77	7.76036	58	7.76036	54	7.76036	59	7.76036	62	7.76036	67	7.76036	65	7.76036	65	7.76036	70	7.76036	95	7.76036	86
7.77736	61	7.77736	68	7.77736	69	7.77736	57	7.77736	71	7.77736	70	7.77736	77	7.77736	81	7.77736	78	7.77736	78	7.77736	58	7.77736	65	7.77736	65
7.79436	51	7.79436	78	7.79436	53	7.79436	66	7.79436	65	7.79436	62	7.79436	74	7.79436	82	7.79436	90	7.79436	90	7.79436	70	7.79436	79	7.79436	74
7.81136	62	7.81136	70	7.81136	66	7.81136	69	7.81136	67	7.81136	79	7.81136	80	7.81136	83	7.81136	89	7.81136	89	7.81136	71	7.81136	75	7.81136	66
7.82836	71	7.82836	76	7.82836	57	7.82836	60	7.82836	66	7.82836	80	7.82836	67	7.82836	62	7.82836	83	7.82836	83	7.82836	93	7.82836	81	7.82836	79
7.84536	66	7.84536	59	7.84536	78	7.84536	55	7.84536	66	7.84536	68	7.84536	74	7.84536	71	7.84536	73	7.84536	73	7.84536	74	7.84536	71	7.84536	74
7.86236	51	7.86236	59	7.86236	70	7.86236	67	7.86236	68	7.86236	65	7.86236	72	7.86236	76	7.86236	77	7.86236	77	7.86236	66	7.86236	74	7.86236	81
7.87936	53	7.87936	52	7.87936	77	7.87936	72	7.87936	58	7.87936	61	7.87936	61	7.87936	64	7.87936	79	7.87936	79	7.87936	61	7.87936	80	7.87936	67
7.89636	65	7.89636	57	7.89636	64	7.89636	69	7.89636	67	7.89636	84	7.89636	63	7.89636	60	7.89636	69	7.89636	69	7.89636	74	7.89636	84	7.89636	86
7.91336	50	7.91336	64	7.91336	76	7.91336	68	7.91336	68	7.91336	74	7.91336	58	7.91336	66	7.91336	74	7.91336	74	7.91336	74	7.91336	71	7.91336	72
7.93036	56	7.93036	56	7.93036	74	7.93036	64	7.93036	73	7.93036	75	7.93036	76	7.93036	65	7.93036	73	7.93036	73	7.93036	69	7.93036	73	7.93036	68
7.94736	70	7.94736	63	7.94736	60	7.94736	58	7.94736	70	7.94736	79	7.94736	76	7.94736	58	7.94736	70	7.94736	70	7.94736	67	7.94736	80	7.94736	73
7.96436	67	7.96436	74	7.96436	61	7.96436	78	7.96436	71	7.96436	73	7.96436	69	7.96436	50	7.96436	75	7.96436	75	7.96436	69	7.96436	71	7.96436	66
7.98136	61	7.98136	62	7.98136	69	7.98136	69	7.98136	69	7.98136	70	7.98136	81	7.98136	66	7.98136	73	7.98136	73	7.98136	73	7.98136	82	7.98136	69
7.99836	61	7.99836	56	7.99836	53	7.99836	61	7.99836	66	7.99836	70	7.99836	72	7.99836	82	7.99836	73	7.99836	73	7.99836	73	7.99836	71	7.99836	75
8.01536	66	8.01536	60	8.01536	62	8.01536	68	8.01536	68	8.01536	67	8.01536	81	8.01536	78	8.01536	85	8.01536	85	8.01536	64	8.01536	73	8.01536	79
8.03236	68	8.03236	71	8.03236	60	8.03236	73	8.03236	74	8.03236	69	8.03236	78	8.03236	61	8.03236	85	8.03236	85	8.03236	68	8.03236	77	8.03236	82
8.04936	60	8.04936	70	8.04936	56	8.04936	67	8.04936	67	8.04936	66	8.04936	73	8.04936	62	8.04936	79	8.04936	79	8.04936	67	8.04936	74	8.04936	67
8.06636	61	8.06636	69	8.06636	61	8.06636	61	8.06636	62	8.06636	63	8.06636	71	8.06636	58	8.06636	73	8.06636	73	8.06636	73	8.06636	76	8.06636	66
8.08336	58	8.08336	72	8.08336	62	8.08336	59	8.08336	78	8.08336	69	8.08336	72	8.08336	54	8.08336	72	8.08336	72	8.08336	74	8.08336	74	8.08336	79
8.10036	65	8.10036	67	8.10036	68	8.10036	62	8.10036	87	8.10036	66	8.10036	70	8.10036	53	8.10036	61	8.10036	61	8.10036	64	8.10036	75	8.10036	85
8.11736	65	8.11736	70	8.11736	63	8.11736	58	8.11736	76	8.11736	60	8.11736	68	8.11736	60	8.11736	66	8.11736	66	8.11736	67	8.11736	77	8.11736	72
8.13436	59	8.13436	74	8.13436	59	8.13436	62	8.13436	72	8.13436	66	8.13436	72	8.13436	68	8.13436	81	8.13436	81	8.13436	74	8.13436	83	8.13436	67
8.15136	60	8.15136	65	8.15136	56	8.15136	65	8.15136	79	8.15136	71	8.15136	75	8.15136	72	8.15136	76	8.15136	76	8.15136	73	8.15136	80	8.15136	71
8.16836	61	8.16836	63	8.16836	59	8.16836	58	8.16836	73	8.16836	70	8.16836	84	8.16836	62	8.16836	75	8.16836	75	8.16836	70	8.16836	87	8.16836	77
8.18536	66	8.18536	60	8.18536	58	8.18536	58	8.18536	74	8.18536	70	8.18536	78	8.18536	61	8.18536	77	8.18536	77	8.18536	75	8.18536	76	8.18536	79
8.20236	65	8.20236	62	8.20236	63	8.20236	57	8.20236	70	8.20236	68	8.20236	60	8.20236	62	8.20236	75	8.20236	75	8.20236	75	8.20236	75	8.20236	67
8.21936	62	8.21936	64	8.21936	67	8.21936	59	8.21936	64	8.21936	60	8.21936	64	8.21936	59	8.21936	67	8.21936	67	8.21936	68	8.21936	72	8.21936	75
8.23636	64	8.23636	68	8.23636	65	8.23636	64	8.23636	68	8.23636	65	8.23636	71	8.23636	61	8.23636	70	8.23636	70	8.23636	70	8.23636	68	8.23636	78
8.25336	67	8.25336	67	8.25336	67	8.25336	65	8.25336	68	8.25336	72	8.25336	69	8.25336	70	8.25336	68	8.25336	68	8.25336	71	8.25336	68	8.25336	66
8.27036	67	8.27036	73	8.27036	75	8.27036	63	8.27036	62	8.27036	58	8.27036	61	8.27036	64	8.27036	79	8.27036	79	8.27036	71	8.27036	69	8.27036	69
8.28736	66	8.28736	64	8.28736	71	8.28736	70	8.28736	71	8.28736	53	8.28736	67	8.28736	66	8.28736	76	8.28736	76	8.28736	71	8.28736	77	8.28736	77
8.30436	66	8.30436	63	8.30436	64	8.30436	68	8.30436	62	8.30436	64	8.30436	63	8.30436	76	8.30436	82	8.30436	82	8.30436	78	8.30436	74	8.30436	84
8.32136	59	8.32136	70	8.32136	67	8.32136	67	8.32136	62	8.32136	70	8.32136	66	8.32136	72	8.32136	90	8.32136	90	8.32136	68	8.32136	70	8.32136	74
8.33836	57	8.33836	67	8.33836	62	8.33836	71	8.33836	73	8.33836	76	8.33836	63	8.33836	76	8.33836	71	8.33836	71	8.33836	64	8.33836	70	8.33836	75
8.35536	59	8.35536	69	8.35536	64	8.35536	75	8.35536	64	8.35536	75	8.35536	64	8.35536	72	8.35536	72	8.35536	72	8.35536	62	8.35536	78	8.35536	79
8.37236	62	8.37236	59	8.37236	62	8.37236	80	8.37236	66	8.37236	72	8.37236	69	8.37236	68	8.37236	83	8.37236	83	8.37236	60	8.37236	84	8.37236	72
8.38936	74	8.38936	70	8.38936	78	8.38936	72	8.38936	67	8.38936	74	8.38936	73	8.38936	72	8.38936	88	8.38936	88	8.38936	66	8.38936	85	8.38936	79
8.40636	59	8.40636	80	8.40636	62	8.40636	65	8.40636	74	8.40636	71	8.40636	72	8.40636	68	8.40636	85	8.40636	85	8.40636	74	8.40636	96	8.40636	79
8.42336	55	8.42336	79	8.42336	67	8.42336	56	8.42336	81	8.42336	69	8.42336	70	8.42336	73	8.42336	86	8.42336	86	8.42336	78	8.42336	72	8.42336	79
8.44036	53	8.44036	73	8.44036	80	8.44036	58	8.44036	60	8.44036	75	8.44036	70	8.44036	67	8.44036	95	8.44036	95	8.44036	80	8.44036	70	8.44036	70
8.45736	63	8.45736	67	8.45736	65	8.45736	68	8.45736	62	8.45736	79	8.45736	62	8.45736	73	8.45736	82	8.45736	82	8.45736	86	8.45736	72	8.45736	79
8.47436	77	8.47436	79	8.47436	77	8.47436	79	8.47436	68	8.47436	80	8.47436	67	8.47436	79	8.47436	72	8.47436	72	8.47436	85	8.47436	78	8.47436	88
8.49136	70	8.49136	58	8.49136	68	8.49136	68	8.49136	66	8.49136	69	8.49136	77	8.49136	58	8.49136	78	8.49136	78	8.49136	81	8.49136	76	8.49136	93
8.50836	71	8.50836	53	8.50836	67	8.50836	63	8.50836	72	8.50836	67	8.50836	80	8.50836	86	8.50836	81	8.50836	81	8.50836	80	8.50836	85	8.50836	85
8.52536	60	8.52536	62	8.52536	82	8.52536	55	8.52536	68	8.52536	60	8.52536	73	8.52536	94	8.52536	76	8.52536	76	8.52536	75	8.52536	89	8.52536	69
8.54236	48	8.54236	67	8.54236	71	8.54236	58	8.54236	71	8.54236	69	8.54236	84	8.54236	90	8.54236	99	8.54236	99	8.54236	71	8.54236	75	8.54236	60
8.55936	66	8.55936	53	8.55936	67	8.55936	72	8.55936	73	8.55936	68	8.55936	80	8.55936	76	8.55936	73	8.55936	73	8.55936	86	8.55936	76	8.55936	78
8.57636	64	8.57636	79	8.57636	87	8.57636	84	8.57636	67	8.57636	69	8.57636	74	8.57636	71	8.57636	73	8.57636	73	8.57636	60	8.57636	86	8.57636	82
8.59336	68	8.59336	86	8.59336	70	8.59336	65	8.59336	67	8.59336	68	8.59336	62	8.59336	75	8.59336	82	8.59336	82	8.59336	63	8.59336	81	8.59336	81
8.61036	74	8.61036	64	8.61036	68	8.61036	70	8.61036	71	8.61036	84	8.61036	88	8.61036	75	8.61036	79	8.61036	79	8.61036	80	8.61036	87	8.61036	79
8.62736	74	8.62736	72	8.62736	55	8.62736	79	8.62736	71	8.62736	76	8.62736	82	8.62736	63	8.62736	85	8.62736	85	8.62736	89	8.62736	91	8.62736	73
8.64436	63	8.64436	76	8.64436	63	8.64436	81	8.64436	73	8.64436	60	8.64436	94	8.64436	80	8.64436	69	8.64436	69	8.64436	74	8.64436	95	8.64436	89
8.66136	74	8.66136	84	8.66136	79	8.66136	81	8.66136	92	8.66136	63	8.66136	78	8.66136	81	8.66136	94	8.66136	94	8.66136	91	8.66136	94	8.66136	83
8.67836	82	8.67836	66	8.67836	87	8.67836	87	8.67836	90	8.67836	85	8.67836	85	8.67836	84	8.67836	79	8.67836	79	8.67836	78	8.67836	97	8.67836	73
8.69536	73	8.69536	94	8.69536	83	8.69536	75	8.69536	98	8.69536	89	8.69536	95	8.69536	65	8.69536	86	8.69536	86	8.69536	84	8.69536	81	8.69536	87
8.71236	82	8.71236	82	8.71236	67	8.71236	67	8.71236	87	8.71236	85	8.71236	84	8.71236	70	8.71236	96	8.71236	96	8.71236	89	8.71236	105	8.71236	84
8.72936	91	8.72936	78	8.72936	72	8.72936	61	8.72936	84	8.72936	79	8.72936	85	8.72936	79	8.72936	94	8.72936	94	8.72936	111	8.72936	86	8.72936	95
8.74636	79	8.74636	79	8.74636	68	8.74636	95	8.74636	89	8.74636	80	8.74636	92	8.74636	89	8.74636	97	8.74636	97	8.74636	104	8.74636	108	8.74636	87
8.76336	82	8.76336	76	8.76336	83	8.76336	72	8.76336	102	8.76336	91	8.76336	98	8.76336	103	8.76336	105	8.76336	105	8.76336	88	8.76336	127	8.76336	105
8.78036	87	8.78036	88	8.78036	79	8.78036	82	8.78036	88	8.78036	104	8.78036	110	8.78036	108	8.78036	108	8.78036	108	8.78036	106	8.78036	112	8.78036	95
8.79736	86	8.79736	90	8.79736	88	8.79736	106	8.79736	81	8.79736	107	8.79736	107	8.79736	118	8.79736	123	8.79736	123	8.79736	107	8.79736	104	8.79736	107
8.81436	98	8.81436	90	8.81436	95	8.81436	90	8.81436	111	8.81436	113	8.81436	128	8.81436	117	8.81436	143	8.81436	143	8.81436	133	8.81436	128	8.81436	124
8.83136	111	8.83136	105	8.83136	109	8.83136	95	8.83136	118	8.83136	129	8.83136	134	8.83136	127	8.83136	150	8.83136	150	8.83136	145	8.83136	115	8.83136	119
8.84836	138	8.84836	99	8.84836	100	8.84836	115	8.84836	128	8.84836	138	8.84836	172	8.84836	177	8.84836	156	8.84836	156	8.84836	170	8.84836	174	8.84836	127
8.86536	146	8.86536	129	8.86536	124	8.86536	138	8.86536	157	8.86536	149	8.86536	206	8.86536	162	8.86536	178	8.86536	178	8.86536	194	8.86536	171	8.86536	142
8.88236	162	8.88236	172	8.88236	145	8.88236	157	8.88236	183	8.88236	232	8.88236	259	8.88236	159	8.88236	218	8.88236	218	8.88236	200	8.88236	180	8.88236	171
8.89936	175	8.89936	177	8.89936	181	8.89936	177	8.89936	221	8.89936	225	8.89936	268	8.89936	148	8.89936	226	8.89936	226	8.89936	217	8.89936	224	8.89936	184
8.91636	176	8.91636	151	8.91636	185	8.91636	209	8.91636	245	8.91636	183	8.91636	293	8.91636	104	8.91636	207	8.91636	207	8.91636	179	8.91636	233	8.91636	189
8.93336	170	8.93336	119	8.93336	164	8.93336	192	8.93336	237	8.93336	144	8.93336	234	8.93336	92	8.93336	152	8.93336	152	8.93336	130	8.93336	180	8.93336	170
8.95036	153	8.95036	95	8.95036	150	8.95036	149	8.95036	181	8.95036	102	8.95036	149	8.95036	86	8.95036	123	8.95036	123	8.95036	107	8.95036	128	8.95036	129
8.96736	111	8.96736	91	8.96736	110	8.96736	123	8.96736	128	8.96736	93	8.96736	99	8.96736	79	8.96736	97	8.96736	97	8.96736	92	8.96736	93	8.96736	111
8.98436	84	8.98436	65	8.98436	84	8.98436	79	8.98436	100	8.98436	83	8.98436	88	8.98436	77	8.98436	79	8.98436	79	8.98436	81	8.98436	79	8.98436	92
9.00136	70	9.00136	72	9.00136	79	9.00136	67	9.00136	91	9.00136	70	9.00136	71	9.00136	58	9.00136	82	9.00136	82	9.00136	72	9.00136	75	9.00136	79
9.01836	66	9.01836	75	9.01836	66	9.01836	62	9.01836	77	9.01836	65	9.01836	69	9.01836	60	9.01836	76	9.01836	76	9.01836	66	9.01836	72	9.01836	83
9.03536	61	9.03536	74	9.03536	63	9.03536	54	9.03536	71	9.03536	58	9.03536	74	9.03536	64	9.03536	74	9.03536	74	9.03536	63	9.03536	76	9.03536	79
9.05236	56	9.05236	65	9.05236	69	9.05236	61	9.05236	64	9.05236	57	9.05236	68	9.05236	62	9.05236	75	9.05236	75	9.05236	63	9.05236	88	9.05236	65
9.06936	61	9.06936	69	9.06936	69	9.06936	63	9.06936	64	9.06936	51	9.06936	72	9.06936	62	9.06936	79	9.06936	79	9.06936	66	9.06936	87	9.06936	67
9.08636	64	9.08636	68	9.08636	69	9.08636	53	9.08636	62	9.08636	54	9.08636	77	9.08636	64	9.08636	72	9.08636	72	9.08636	63	9.08636	80	9.08636	70
9.10336	66	9.10336	67	9.10336	65	9.10336	58	9.10336	65	9.10336	55	9.10336	69	9.10336	72	9.10336	73	9.10336	73	9.10336	72	9.10336	78	9.10336	75
9.12036	66	9.12036	66	9.12036	69	9.12036	61	9.12036	75	9.12036	58	9.12036	70	9.12036	71	9.12036	78	9.12036	78	9.12036	71	9.12036	78	9.12036	75
9.13736	60	9.13736	66	9.13736	74	9.13736	61	9.13736	65	9.13736	61	9.13736	69	9.13736	68	9.13736	66	9.13736	66	9.13736	56	9.13736	62	9.13736	59
9.15436	64	9.15436	68	9.15436	66	9.15436	61	9.15436	60	9.15436	68	9.15436	65	9.15436	59	9.15436	65	9.15436	65	9.15436	60	9.15436	52	9.15436	66
9.17136	67	9.17136	59	9.17136	61	9.17136	57	9.17136	69	9.17136	64	9.17136	72	9.17136	61	9.17136	74	9.17136	74	9.17136	69	9.17136	52	9.17136	77
9.18836	64	9.18836	60	9.18836	59	9.18836	63	9.18836	70	9.18836	64	9.18836	75	9.18836	64	9.18836	75	9.18836	75	9.18836	76	9.18836	63	9.18836	76
9.20536	64	9.20536	57	9.20536	61	9.20536	65	9.20536	69	9.20536	67	9.20536	72	9.20536	62	9.20536	68	9.20536	68	9.20536	74	9.20536	61	9.20536	77
9.22236	53	9.22236	55	9.22236	63	9.22236	66	9.22236	63	9.22236	70	9.22236	65	9.22236	67	9.22236	70	9.22236	70	9.22236	69	9.22236	65	9.22236	81
9.23936	58	9.23936	51	9.23936	60	9.23936	62	9.23936	53	9.23936	64	9.23936	61	9.23936	66	9.23936	66	9.23936	66	9.23936	66	9.23936	70	9.23936	79
9.25636	66	9.25636	53	9.25636	65	9.25636	59	9.25636	59	9.25636	56	9.25636	55	9.25636	70	9.25636	62	9.25636	62	9.25636	70	9.25636	71	9.25636	76
9.27336	56	9.27336	59	9.27336	59	9.27336	63	9.27336	64	9.27336	55	9.27336	66	9.27336	75	9.27336	70	9.27336	70	9.27336	67	9.27336	74	9.27336	65
9.29036	54	9.29036	58	9.29036	55	9.29036	65	9.29036	65	9.29036	61	9.29036	67	9.29036	67	9.29036	74	9.29036	74	9.29036	58	9.29036	73	9.29036	61
9.30736	51	9.30736	63	9.30736	62	9.30736	62	9.30736	57	9.30736	57	9.30736	56	9.30736	58	9.30736	64	9.30736	64	9.30736	59	9.30736	67	9.30736	53
9.32436	47	9.32436	65	9.32436	65	9.32436	67	9.32436	75	9.32436	48	9.32436	59	9.32436	52	9.32436	67	9.32436	67	9.32436	64	9.32436	61	9.32436	68
9.34136	53	9.34136	51	9.34136	57	9.34136	64	9.34136	67	9.34136	55	9.34136	71	9.34136	57	9.34136	74	9.34136	74	9.34136	68	9.34136	62	9.34136	77
9.35836	59	9.35836	63	9.35836	62	9.35836	54	9.35836	52	9.35836	65	9.35836	65	9.35836	57	9.35836	70	9.35836	70	9.35836	66	9.35836	61	9.35836	69
9.37536	64	9.37536	54	9.37536	67	9.37536	57	9.37536	53	9.37536	56	9.37536	57	9.37536	55	9.37536	72	9.37536	72	9.37536	60	9.37536	64	9.37536	68
9.39236	49	9.39236	64	9.39236	60	9.39236	55	9.39236	62	9.39236	54	9.39236	67	9.39236	63	9.39236	68	9.39236	68	9.39236	66	9.39236	58	9.39236	60
9.40936	59	9.40936	68	9.40936	60	9.40936	46	9.40936	57	9.40936	58	9.40936	67	9.40936	65	9.40936	66	9.40936	66	9.40936	63	9.40936	62	9.40936	67
9.42636	68	9.42636	71	9.42636	55	9.42636	45	9.42636	54	9.42636	62	9.42636	68	9.42636	70	9.42636	66	9.42636	66	9.42636	67	9.42636	66	9.42636	67
9.44336	68	9.44336	69	9.44336	47	9.44336	52	9.44336	60	9.44336	65	9.44336	80	9.44336	67	9.44336	68	9.44336	68	9.44336	71	9.44336	64	9.44336	68
9.46036	64	9.46036	59	9.46036	63	9.46036	52	9.46036	70	9.46036	65	9.46036	73	9.46036	58	9.46036	70	9.46036	70	9.46036	73	9.46036	58	9.46036	67
9.47736	66	9.47736	54	9.47736	60	9.47736	59	9.47736	65	9.47736	57	9.47736	69	9.47736	70	9.47736	67	9.47736	67	9.47736	61	9.47736	66	9.47736	70
9.49436	62	9.49436	57	9.49436	56	9.49436	66	9.49436	67	9.49436	52	9.49436	62	9.49436	48	9.49436	75	9.49436	75	9.49436	63	9.49436	52	9.49436	64
9.51136	44	9.51136	60	9.51136	60	9.51136	56	9.51136	61	9.51136	56	9.51136	53	9.51136	55	9.51136	59	9.51136	59	9.51136	66	9.51136	64	9.51136	74
9.52836	62	9.52836	64	9.52836	51	9.52836	58	9.52836	68	9.52836	61	9.52836	66	9.52836	58	9.52836	70	9.52836	70	9.52836	65	9.52836	87	9.52836	74
9.54536	58	9.54536	81	9.54536	63	9.54536	56	9.54536	44	9.54536	58	9.54536	61	9.54536	61	9.54536	83	9.54536	83	9.54536	46	9.54536	73	9.54536	58
9.56236	55	9.56236	66	9.56236	71	9.56236	64	9.56236	51	9.56236	61	9.56236	56	9.56236	56	9.56236	72	9.56236	72	9.56236	58	9.56236	61	9.56236	57
9.57936	53	9.57936	70	9.57936	69	9.57936	70	9.57936	50	9.57936	58	9.57936	60	9.57936	60	9.57936	54	9.57936	54	9.57936	61	9.57936	81	9.57936	72
9.59636	52	9.59636	67	9.59636	61	9.59636	59	9.59636	56	9.59636	71	9.59636	69	9.59636	57	9.59636	66	9.59636	66	9.59636	66	9.59636	52	9.59636	79
9.61336	48	9.61336	56	9.61336	56	9.61336	54	9.61336	57	9.61336	74	9.61336	59	9.61336	47	9.61336	63	9.61336	63	9.61336	60	9.61336	67	9.61336	55
9.63036	57	9.63036	42	9.63036	57	9.63036	66	9.63036	60	9.63036	69	9.63036	58	9.63036	63	9.63036	67	9.63036	67	9.63036	71	9.63036	78	9.63036	71
9.64736	56	9.64736	52	9.64736	56	9.64736	82	9.64736	53	9.64736	61	9.64736	69	9.64736	66	9.64736	74	9.64736	74	9.64736	64	9.64736	66	9.64736	60
9.66436	56	9.66436	63	9.66436	61	9.66436	61	9.66436	59	9.66436	56	9.66436	70	9.66436	59	9.66436	59	9.66436	59	9.66436	59	9.66436	73	9.66436	71
9.68136	63	9.68136	59	9.68136	61	9.68136	49	9.68136	50	9.68136	59	9.68136	67	9.68136	58	9.68136	58	9.68136	58	9.68136	58	9.68136	76	9.68136	64
9.69836	50	9.69836	57	9.69836	59	9.69836	40	9.69836	53	9.69836	66	9.69836	69	9.69836	57	9.69836	73	9.69836	73	9.69836	79	9.69836	70	9.69836	67
9.71536	51	9.71536	54	9.71536	55	9.71536	52	9.71536	52	9.71536	58	9.71536	78	9.71536	55	9.71536	59	9.71536	59	9.71536	60	9.71536	53	9.71536	78
9.73236	54	9.73236	49	9.73236	67	9.73236	62	9.73236	54	9.73236	76	9.73236	72	9.73236	64	9.73236	57	9.73236	57	9.73236	62	9.73236	70	9.73236	70
9.74936	57	9.74936	54	9.74936	54	9.74936	44	9.74936	54	9.74936	56	9.74936	47	9.74936	68	9.74936	59	9.74936	59	9.74936	67	9.74936	70	9.74936	69
9.76636	64	9.76636	61	9.76636	59	9.76636	54	9.76636	63	9.76636	60	9.76636	58	9.76636	48	9.76636	56	9.76636	56	9.76636	68	9.76636	66	9.76636	79
9.78336	50	9.78336	60	9.78336	65	9.78336	50	9.78336	55	9.78336	53	9.78336	54	9.78336	51	9.78336	53	9.78336	53	9.78336	66	9.78336	65	9.78336	64
9.80036	53	9.80036	67	9.80036	47	9.80036	56	9.80036	55	9.80036	54	9.80036	57	9.80036	61	9.80036	74	9.80036	74	9.80036	69	9.80036	68	9.80036	69
9.81736	54	9.81736	57	9.81736	45	9.81736	54	9.81736	59	9.81736	59	9.81736	52	9.81736	60	9.81736	62	9.81736	62	9.81736	67	9.81736	65	9.81736	68
9.83436	54	9.83436	55	9.83436	53	9.83436	56	9.83436	60	9.83436	53	9.83436	54	9.83436	55	9.83436	80	9.83436	80	9.83436	67	9.83436	86	9.83436	71
9.85136	61	9.85136	56	9.85136	59	9.85136	57	9.85136	53	9.85136	55	9.85136	67	9.85136	49	9.85136	72	9.85136	72	9.85136	64	9.85136	71	9.85136	73
9.86836	55	9.86836	51	9.86836	60	9.86836	65	9.86836	63	9.86836	52	9.86836	71	9.86836	66	9.86836	82	9.86836	82	9.86836	67	9.86836	71	9.86836	70
9.88536	59	9.88536	52	9.88536	68	9.88536	52	9.88536	61	9.88536	50	9.88536	68	9.88536	61	9.88536	57	9.88536	57	9.88536	69	9.88536	66	9.88536	81
9.90236	51	9.90236	55	9.90236	57	9.90236	58	9.90236	57	9.90236	55	9.90236	61	9.90236	64	9.90236	59	9.90236	59	9.90236	65	9.90236	52	9.90236	73
9.91936	50	9.91936	55	9.91936	60	9.91936	71	9.91936	64	9.91936	54	9.91936	74	9.91936	70	9.91936	71	9.91936	71	9.91936	56	9.91936	66	9.91936	64
9.93636	50	9.93636	49	9.93636	53	9.93636	59	9.93636	71	9.93636	67	9.93636	55	9.93636	60	9.93636	63	9.93636	63	9.93636	56	9.93636	73	9.93636	58
9.95336	44	9.95336	60	9.95336	51	9.95336	47	9.95336	58	9.95336	62	9.95336	54	9.95336	63	9.95336	60	9.95336	60	9.95336	58	9.95336	63	9.95336	57
9.97036	53	9.97036	59	9.97036	60	9.97036	56	9.97036	53	9.97036	59	9.97036	60	9.97036	63	9.97036	67	9.97036	67	9.97036	61	9.97036	74	9.97036	69
9.98736	64	9.98736	52	9.98736	56	9.98736	51	9.98736	60	9.98736	60	9.98736	70	9.98736	59	9.98736	67	9.98736	67	9.98736	71	9.98736	69	9.98736	70
10.0044	65	10.0044	54	10.0044	68	10.0044	46	10.0044	61	10.0044	60	10.0044	70	10.0044	63	10.0044	58	10.0044	58	10.0044	71	10.0044	74	10.0044	58
10.0214	62	10.0214	59	10.0214	66	10.0214	57	10.0214	58	10.0214	59	10.0214	62	10.0214	58	10.0214	69	10.0214	69	10.0214	62	10.0214	75	10.0214	55
10.0384	63	10.0384	68	10.0384	57	10.0384	57	10.0384	53	10.0384	55	10.0384	63	10.0384	60	10.0384	60	10.0384	60	10.0384	59	10.0384	62	10.0384	62
10.0554	66	10.0554	62	10.0554	62	10.0554	56	10.0554	57	10.0554	61	10.0554	62	10.0554	68	10.0554	63	10.0554	63	10.0554	61	10.0554	56	10.0554	55
10.0724	64	10.0724	51	10.0724	56	10.0724	53	10.0724	53	10.0724	55	10.0724	60	10.0724	62	10.0724	70	10.0724	70	10.0724	67	10.0724	60	10.0724	66
10.0894	65	10.0894	56	10.0894	54	10.0894	53	10.0894	56	10.0894	57	10.0894	66	10.0894	64	10.0894	70	10.0894	70	10.0894	70	10.0894	61	10.0894	71
10.1064	59	10.1064	59	10.1064	56	10.1064	53	10.1064	66	10.1064	70	10.1064	57	10.1064	71	10.1064	67	10.1064	67	10.1064	64	10.1064	62	10.1064	72
10.1234	59	10.1234	45	10.1234	61	10.1234	60	10.1234	64	10.1234	64	10.1234	52	10.1234	64	10.1234	67	10.1234	67	10.1234	67	10.1234	78	10.1234	69
10.1404	62	10.1404	47	10.1404	67	10.1404	67	10.1404	55	10.1404	48	10.1404	64	10.1404	58	10.1404	70	10.1404	70	10.1404	64	10.1404	78	10.1404	64
10.1574	62	10.1574	50	10.1574	61	10.1574	70	10.1574	64	10.1574	61	10.1574	74	10.1574	55	10.1574	69	10.1574	69	10.1574	61	10.1574	70	10.1574	70
10.1744	59	10.1744	55	10.1744	58	10.1744	68	10.1744	65	10.1744	66	10.1744	67	10.1744	61	10.1744	62	10.1744	62	10.1744	59	10.1744	67	10.1744	65
10.1914	55	10.1914	70	10.1914	65	10.1914	64	10.1914	61	10.1914	55	10.1914	55	10.1914	52	10.1914	73	10.1914	73	10.1914	60	10.1914	63	10.1914	71
10.2084	56	10.2084	65	10.2084	68	10.2084	58	10.2084	56	10.2084	62	10.2084	56	10.2084	46	10.2084	72	10.2084	72	10.2084	51	10.2084	66	10.2084	68
10.2254	59	10.2254	64	10.2254	55	10.2254	57	10.2254	55	10.2254	70	10.2254	60	10.2254	55	10.2254	72	10.2254	72	10.2254	53	10.2254	64	10.2254	65
10.2424	58	10.2424	61	10.2424	52	10.2424	56	10.2424	64	10.2424	58	10.2424	63	10.2424	64	10.2424	72	10.2424	72	10.2424	57	10.2424	69	10.2424	71
10.2594	59	10.2594	53	10.2594	62	10.2594	61	10.2594	62	10.2594	53	10.2594	62	10.2594	64	10.2594	59	10.2594	59	10.2594	62	10.2594	69	10.2594	62
10.2764	58	10.2764	56	10.2764	62	10.2764	54	10.2764	59	10.2764	56	10.2764	64	10.2764	63	10.2764	57	10.2764	57	10.2764	66	10.2764	70	10.2764	52
10.2934	52	10.2934	66	10.2934	49	10.2934	61	10.2934	54	10.2934	63	10.2934	67	10.2934	69	10.2934	57	10.2934	57	10.2934	68	10.2934	71	10.2934	63
10.3104	41	10.3104	68	10.3104	52	10.3104	65	10.3104	61	10.3104	68	10.3104	58	10.3104	58	10.3104	64	10.3104	64	10.3104	61	10.3104	68	10.3104	65
10.3274	48	10.3274	57	10.3274	51	10.3274	63	10.3274	67	10.3274	57	10.3274	51	10.3274	57	10.3274	59	10.3274	59	10.3274	52	10.3274	70	10.3274	67
10.3444	61	10.3444	58	10.3444	53	10.3444	62	10.3444	57	10.3444	49	10.3444	59	10.3444	57	10.3444	56	10.3444	56	10.3444	66	10.3444	72	10.3444	68
10.3614	58	10.3614	50	10.3614	58	10.3614	63	10.3614	53	10.3614	52	10.3614	59	10.3614	56	10.3614	67	10.3614	67	10.3614	69	10.3614	67	10.3614	53
10.3784	63	10.3784	55	10.3784	57	10.3784	60	10.3784	64	10.3784	64	10.3784	66	10.3784	63	10.3784	65	10.3784	65	10.3784	60	10.3784	84	10.3784	57
10.3954	56	10.3954	50	10.3954	52	10.3954	63	10.3954	62	10.3954	76	10.3954	65	10.3954	75	10.3954	59	10.3954	59	10.3954	65	10.3954	70	10.3954	74
10.4124	56	10.4124	61	10.4124	43	10.4124	59	10.4124	69	10.4124	69	10.4124	58	10.4124	62	10.4124	57	10.4124	57	10.4124	70	10.4124	58	10.4124	64
10.4294	56	10.4294	62	10.4294	60	10.4294	56	10.4294	70	10.4294	61	10.4294	65	10.4294	60	10.4294	55	10.4294	55	10.4294	56	10.4294	79	10.4294	71
10.4464	66	10.4464	56	10.4464	71	10.4464	59	10.4464	60	10.4464	55	10.4464	61	10.4464	53	10.4464	49	10.4464	49	10.4464	55	10.4464	72	10.4464	63
10.4634	56	10.4634	58	10.4634	55	10.4634	66	10.4634	55	10.4634	62	10.4634	50	10.4634	51	10.4634	72	10.4634	72	10.4634	54	10.4634	65	10.4634	72
10.4804	55	10.4804	63	10.4804	69	10.4804	58	10.4804	57	10.4804	71	10.4804	59	10.4804	53	10.4804	67	10.4804	67	10.4804	70	10.4804	74	10.4804	81
10.4974	56	10.4974	61	10.4974	66	10.4974	69	10.4974	68	10.4974	54	10.4974	58	10.4974	64	10.4974	59	10.4974	59	10.4974	65	10.4974	72	10.4974	73
10.5144	42	10.5144	73	10.5144	64	10.5144	58	10.5144	50	10.5144	55	10.5144	67	10.5144	63	10.5144	61	10.5144	61	10.5144	75	10.5144	58	10.5144	75
10.5314	63	10.5314	54	10.5314	69	10.5314	64	10.5314	59	10.5314	57	10.5314	52	10.5314	65	10.5314	65	10.5314	65	10.5314	59	10.5314	80	10.5314	59
10.5484	50	10.5484	56	10.5484	59	10.5484	64	10.5484	58	10.5484	61	10.5484	62	10.5484	56	10.5484	72	10.5484	72	10.5484	66	10.5484	82	10.5484	53
10.5654	55	10.5654	65	10.5654	65	10.5654	72	10.5654	58	10.5654	66	10.5654	59	10.5654	64	10.5654	63	10.5654	63	10.5654	65	10.5654	73	10.5654	52
10.5824	67	10.5824	53	10.5824	64	10.5824	57	10.5824	54	10.5824	53	10.5824	56	10.5824	58	10.5824	54	10.5824	54	10.5824	58	10.5824	63	10.5824	75
10.5994	47	10.5994	55	10.5994	79	10.5994	55	10.5994	52	10.5994	55	10.5994	67	10.5994	55	10.5994	52	10.5994	52	10.5994	67	10.5994	74	10.5994	71
10.6164	58	10.6164	54	10.6164	63	10.6164	50	10.6164	64	10.6164	58	10.6164	71	10.6164	45	10.6164	64	10.6164	64	10.6164	63	10.6164	65	10.6164	54
10.6334	56	10.6334	67	10.6334	60	10.6334	53	10.6334	59	10.6334	55	10.6334	66	10.6334	59	10.6334	63	10.6334	63	10.6334	58	10.6334	52	10.6334	72
10.6504	59	10.6504	58	10.6504	48	10.6504	54	10.6504	63	10.6504	59	10.6504	72	10.6504	58	10.6504	68	10.6504	68	10.6504	70	10.6504	60	10.6504	66
10.6674	53	10.6674	52	10.6674	61	10.6674	79	10.6674	56	10.6674	71	10.6674	64	10.6674	54	10.6674	76	10.6674	76	10.6674	64	10.6674	56	10.6674	52
10.6844	56	10.6844	70	10.6844	60	10.6844	50	10.6844	65	10.6844	60	10.6844	54	10.6844	64	10.6844	74	10.6844	74	10.6844	62	10.6844	66	10.6844	51
10.7014	78	10.7014	65	10.7014	51	10.7014	57	10.7014	61	10.7014	55	10.7014	65	10.7014	58	10.7014	68	10.7014	68	10.7014	70	10.7014	58	10.7014	60
10.7184	69	10.7184	62	10.7184	59	10.7184	73	10.7184	58	10.7184	60	10.7184	58	10.7184	57	10.7184	70	10.7184	70	10.7184	65	10.7184	71	10.7184	63
10.7354	61	10.7354	54	10.7354	58	10.7354	70	10.7354	66	10.7354	52	10.7354	64	10.7354	63	10.7354	68	10.7354	68	10.7354	72	10.7354	71	10.7354	60
10.7524	56	10.7524	51	10.7524	71	10.7524	75	10.7524	70	10.7524	56	10.7524	79	10.7524	67	10.7524	52	10.7524	52	10.7524	67	10.7524	69	10.7524	66
10.7694	51	10.7694	57	10.7694	72	10.7694	66	10.7694	67	10.7694	60	10.7694	56	10.7694	64	10.7694	56	10.7694	56	10.7694	62	10.7694	65	10.7694	70
10.7864	53	10.7864	69	10.7864	55	10.7864	62	10.7864	67	10.7864	74	10.7864	57	10.7864	68	10.7864	73	10.7864	73	10.7864	66	10.7864	60	10.7864	74
10.8034	71	10.8034	60	10.8034	62	10.8034	55	10.8034	62	10.8034	62	10.8034	75	10.8034	72	10.8034	71	10.8034	71	10.8034	65	10.8034	65	10.8034	61
10.8204	58	10.8204	56	10.8204	61	10.8204	65	10.8204	56	10.8204	46	10.8204	65	10.8204	75	10.8204	76	10.8204	76	10.8204	63	10.8204	60	10.8204	75
10.8374	59	10.8374	59	10.8374	65	10.8374	78	10.8374	58	10.8374	52	10.8374	70	10.8374	71	10.8374	84	10.8374	84	10.8374	68	10.8374	62	10.8374	59
10.8544	46	10.8544	56	10.8544	52	10.8544	71	10.8544	57	10.8544	55	10.8544	62	10.8544	62	10.8544	66	10.8544	66	10.8544	74	10.8544	70	10.8544	72
10.8714	57	10.8714	53	10.8714	62	10.8714	60	10.8714	55	10.8714	62	10.8714	57	10.8714	56	10.8714	58	10.8714	58	10.8714	60	10.8714	57	10.8714	69
10.8884	62	10.8884	57	10.8884	64	10.8884	64	10.8884	64	10.8884	70	10.8884	52	10.8884	55	10.8884	67	10.8884	67	10.8884	61	10.8884	58	10.8884	73
10.9054	48	10.9054	60	10.9054	56	10.9054	59	10.9054	62	10.9054	62	10.9054	55	10.9054	58	10.9054	71	10.9054	71	10.9054	67	10.9054	57	10.9054	68
10.9224	49	10.9224	64	10.9224	56	10.9224	68	10.9224	57	10.9224	61	10.9224	50	10.9224	61	10.9224	66	10.9224	66	10.9224	71	10.9224	65	10.9224	71
10.9394	53	10.9394	57	10.9394	60	10.9394	66	10.9394	62	10.9394	70	10.9394	62	10.9394	51	10.9394	63	10.9394	63	10.9394	78	10.9394	65	10.9394	60
10.9564	53	10.9564	59	10.9564	59	10.9564	59	10.9564	68	10.9564	60	10.9564	60	10.9564	59	10.9564	80	10.9564	80	10.9564	70	10.9564	61	10.9564	62
10.9734	46	10.9734	67	10.9734	57	10.9734	52	10.9734	63	10.9734	72	10.9734	63	10.9734	64	10.9734	88	10.9734	88	10.9734	59	10.9734	72	10.9734	67
10.9904	56	10.9904	60	10.9904	63	10.9904	62	10.9904	43	10.9904	72	10.9904	75	10.9904	66	10.9904	75	10.9904	75	10.9904	60	10.9904	82	10.9904	67
11.0074	55	11.0074	56	11.0074	57	11.0074	63	11.0074	46	11.0074	70	11.0074	75	11.0074	75	11.0074	65	11.0074	65	11.0074	68	11.0074	71	11.0074	67
11.0244	52	11.0244	66	11.0244	59	11.0244	60	11.0244	64	11.0244	58	11.0244	69	11.0244	72	11.0244	59	11.0244	59	11.0244	78	11.0244	68	11.0244	58
11.0414	54	11.0414	67	11.0414	66	11.0414	70	11.0414	66	11.0414	53	11.0414	76	11.0414	70	11.0414	58	11.0414	58	11.0414	66	11.0414	64	11.0414	65
11.0584	59	11.0584	55	11.0584	66	11.0584	76	11.0584	64	11.0584	55	11.0584	69	11.0584	67	11.0584	60	11.0584	60	11.0584	63	11.0584	60	11.0584	84
11.0754	65	11.0754	55	11.0754	63	11.0754	69	11.0754	58	11.0754	65	11.0754	56	11.0754	62	11.0754	66	11.0754	66	11.0754	69	11.0754	77	11.0754	85
11.0924	63	11.0924	56	11.0924	66	11.0924	69	11.0924	69	11.0924	68	11.0924	60	11.0924	58	11.0924	59	11.0924	59	11.0924	60	11.0924	86	11.0924	75
11.1094	67	11.1094	59	11.1094	69	11.1094	65	11.1094	70	11.1094	69	11.1094	68	11.1094	56	11.1094	67	11.1094	67	11.1094	65	11.1094	76	11.1094	69
11.1264	68	11.1264	64	11.1264	69	11.1264	65	11.1264	54	11.1264	70	11.1264	70	11.1264	62	11.1264	72	11.1264	72	11.1264	64	11.1264	74	11.1264	66
11.1434	61	11.1434	68	11.1434	60	11.1434	67	11.1434	57	11.1434	62	11.1434	67	11.1434	72	11.1434	68	11.1434	68	11.1434	65	11.1434	78	11.1434	78
11.1604	57	11.1604	65	11.1604	54	11.1604	54	11.1604	63	11.1604	54	11.1604	64	11.1604	60	11.1604	68	11.1604	68	11.1604	71	11.1604	75	11.1604	83
11.1774	55	11.1774	71	11.1774	55	11.1774	52	11.1774	68	11.1774	57	11.1774	59	11.1774	55	11.1774	62	11.1774	62	11.1774	76	11.1774	64	11.1774	64
11.1944	63	11.1944	67	11.1944	63	11.1944	58	11.1944	60	11.1944	66	11.1944	62	11.1944	68	11.1944	59	11.1944	59	11.1944	68	11.1944	69	11.1944	61
11.2114	53	11.2114	65	11.2114	65	11.2114	63	11.2114	56	11.2114	74	11.2114	68	11.2114	61	11.2114	75	11.2114	75	11.2114	52	11.2114	65	11.2114	60
11.2284	50	11.2284	61	11.2284	54	11.2284	60	11.2284	55	11.2284	56	11.2284	67	11.2284	66	11.2284	84	11.2284	84	11.2284	52	11.2284	69	11.2284	73
11.2454	57	11.2454	52	11.2454	58	11.2454	65	11.2454	66	11.2454	55	11.2454	59	11.2454	73	11.2454	77	11.2454	77	11.2454	55	11.2454	62	11.2454	84
11.2624	58	11.2624	59	11.2624	56	11.2624	67	11.2624	62	11.2624	65	11.2624	57	11.2624	66	11.2624	71	11.2624	71	11.2624	62	11.2624	53	11.2624	75
11.2794	72	11.2794	63	11.2794	63	11.2794	62	11.2794	65	11.2794	56	11.2794	67	11.2794	62	11.2794	71	11.2794	71	11.2794	75	11.2794	64	11.2794	73
11.2964	71	11.2964	55	11.2964	68	11.2964	55	11.2964	63	11.2964	66	11.2964	70	11.2964	58	11.2964	73	11.2964	73	11.2964	70	11.2964	66	11.2964	70
11.3134	71	11.3134	58	11.3134	58	11.3134	61	11.3134	60	11.3134	66	11.3134	69	11.3134	58	11.3134	70	11.3134	70	11.3134	76	11.3134	71	11.3134	59
11.3304	60	11.3304	54	11.3304	57	11.3304	73	11.3304	68	11.3304	53	11.3304	70	11.3304	58	11.3304	69	11.3304	69	11.3304	60	11.3304	71	11.3304	59
11.3474	62	11.3474	55	11.3474	53	11.3474	58	11.3474	70	11.3474	62	11.3474	59	11.3474	64	11.3474	81	11.3474	81	11.3474	67	11.3474	79	11.3474	59
11.3644	65	11.3644	74	11.3644	54	11.3644	65	11.3644	55	11.3644	66	11.3644	70	11.3644	52	11.3644	73	11.3644	73	11.3644	64	11.3644	74	11.3644	59
11.3814	58	11.3814	63	11.3814	58	11.3814	73	11.3814	66	11.3814	75	11.3814	73	11.3814	66	11.3814	78	11.3814	78	11.3814	66	11.3814	67	11.3814	68
11.3984	82	11.3984	69	11.3984	72	11.3984	60	11.3984	73	11.3984	58	11.3984	63	11.3984	57	11.3984	71	11.3984	71	11.3984	77	11.3984	72	11.3984	58
11.4154	53	11.4154	70	11.4154	68	11.4154	57	11.4154	67	11.4154	68	11.4154	61	11.4154	58	11.4154	56	11.4154	56	11.4154	77	11.4154	66	11.4154	69
11.4324	71	11.4324	62	11.4324	60	11.4324	62	11.4324	59	11.4324	65	11.4324	72	11.4324	71	11.4324	74	11.4324	74	11.4324	72	11.4324	70	11.4324	68
11.4494	65	11.4494	59	11.4494	60	11.4494	60	11.4494	59	11.4494	74	11.4494	65	11.4494	65	11.4494	63	11.4494	63	11.4494	68	11.4494	71	11.4494	59
11.4664	68	11.4664	69	11.4664	68	11.4664	67	11.4664	59	11.4664	85	11.4664	71	11.4664	65	11.4664	66	11.4664	66	11.4664	62	11.4664	55	11.4664	50
11.4834	53	11.4834	66	11.4834	56	11.4834	57	11.4834	59	11.4834	64	11.4834	62	11.4834	72	11.4834	56	11.4834	56	11.4834	57	11.4834	87	11.4834	75
11.5004	66	11.5004	70	11.5004	55	11.5004	59	11.5004	64	11.5004	68	11.5004	68	11.5004	64	11.5004	87	11.5004	87	11.5004	61	11.5004	81	11.5004	68
11.5174	47	11.5174	59	11.5174	68	11.5174	67	11.5174	66	11.5174	67	11.5174	58	11.5174	68	11.5174	67	11.5174	67	11.5174	67	11.5174	79	11.5174	83
11.5344	54	11.5344	56	11.5344	55	11.5344	54	11.5344	77	11.5344	88	11.5344	64	11.5344	64	11.5344	73	11.5344	73	11.5344	49	11.5344	79	11.5344	64
11.5514	81	11.5514	66	11.5514	63	11.5514	57	11.5514	57	11.5514	66	11.5514	74	11.5514	63	11.5514	75	11.5514	75	11.5514	58	11.5514	82	11.5514	53
11.5684	58	11.5684	52	11.5684	75	11.5684	72	11.5684	65	11.5684	58	11.5684	71	11.5684	68	11.5684	68	11.5684	68	11.5684	78	11.5684	70	11.5684	60
11.5854	65	11.5854	61	11.5854	65	11.5854	55	11.5854	67	11.5854	66	11.5854	58	11.5854	65	11.5854	71	11.5854	71	11.5854	82	11.5854	55	11.5854	69
11.6024	59	11.6024	65	11.6024	59	11.6024	63	11.6024	47	11.6024	64	11.6024	60	11.6024	53	11.6024	69	11.6024	69	11.6024	72	11.6024	67	11.6024	86
11.6194	63	11.6194	75	11.6194	63	11.6194	64	11.6194	57	11.6194	73	11.6194	63	11.6194	64	11.6194	73	11.6194	73	11.6194	57	11.6194	78	11.6194	58
11.6364	59	11.6364	60	11.6364	81	11.6364	72	11.6364	66	11.6364	61	11.6364	71	11.6364	72	11.6364	80	11.6364	80	11.6364	78	11.6364	82	11.6364	72
11.6534	67	11.6534	73	11.6534	59	11.6534	70	11.6534	75	11.6534	69	11.6534	67	11.6534	82	11.6534	78	11.6534	78	11.6534	70	11.6534	86	11.6534	80
11.6704	55	11.6704	55	11.6704	69	11.6704	59	11.6704	66	11.6704	69	11.6704	66	11.6704	59	11.6704	84	11.6704	84	11.6704	72	11.6704	66	11.6704	79
11.6874	53	11.6874	57	11.6874	59	11.6874	65	11.6874	57	11.6874	63	11.6874	67	11.6874	67	11.6874	66	11.6874	66	11.6874	68	11.6874	78	11.6874	60
11.7044	67	11.7044	73	11.7044	69	11.7044	68	11.7044	63	11.7044	65	11.7044	65	11.7044	52	11.7044	82	11.7044	82	11.7044	93	11.7044	79	11.7044	72
11.7214	59	11.7214	59	11.7214	72	11.7214	79	11.7214	76	11.7214	68	11.7214	74	11.7214	68	11.7214	66	11.7214	66	11.7214	67	11.7214	77	11.7214	61
11.7384	72	11.7384	59	11.7384	66	11.7384	83	11.7384	73	11.7384	71	11.7384	72	11.7384	64	11.7384	69	11.7384	69	11.7384	82	11.7384	79	11.7384	67
11.7554	74	11.7554	69	11.7554	58	11.7554	55	11.7554	59	11.7554	71	11.7554	78	11.7554	55	11.7554	66	11.7554	66	11.7554	73	11.7554	67	11.7554	79
11.7724	66	11.7724	71	11.7724	65	11.7724	52	11.7724	60	11.7724	73	11.7724	72	11.7724	58	11.7724	68	11.7724	68	11.7724	60	11.7724	77	11.7724	79
11.7894	65	11.7894	66	11.7894	61	11.7894	58	11.7894	54	11.7894	61	11.7894	80	11.7894	74	11.7894	70	11.7894	70	11.7894	66	11.7894	75	11.7894	82
11.8064	60	11.8064	63	11.8064	69	11.8064	74	11.8064	56	11.8064	63	11.8064	76	11.8064	62	11.8064	64	11.8064	64	11.8064	69	11.8064	86	11.8064	69
11.8234	66	11.8234	53	11.8234	60	11.8234	78	11.8234	65	11.8234	66	11.8234	73	11.8234	71	11.8234	67	11.8234	67	11.8234	72	11.8234	68	11.8234	66
11.8404	56	11.8404	68	11.8404	62	11.8404	64	11.8404	58	11.8404	56	11.8404	73	11.8404	65	11.8404	77	11.8404	77	11.8404	72	11.8404	77	11.8404	72
11.8574	60	11.8574	76	11.8574	67	11.8574	72	11.8574	57	11.8574	62	11.8574	81	11.8574	65	11.8574	68	11.8574	68	11.8574	63	11.8574	73	11.8574	72
11.8744	59	11.8744	67	11.8744	66	11.8744	69	11.8744	60	11.8744	76	11.8744	66	11.8744	66	11.8744	81	11.8744	81	11.8744	82	11.8744	71	11.8744	71
11.8914	63	11.8914	49	11.8914	72	11.8914	67	11.8914	59	11.8914	73	11.8914	71	11.8914	69	11.8914	82	11.8914	82	11.8914	69	11.8914	75	11.8914	80
11.9084	58	11.9084	63	11.9084	68	11.9084	72	11.9084	64	11.9084	60	11.9084	64	11.9084	55	11.9084	77	11.9084	77	11.9084	67	11.9084	68	11.9084	73
11.9254	65	11.9254	71	11.9254	62	11.9254	73	11.9254	69	11.9254	66	11.9254	64	11.9254	66	11.9254	74	11.9254	74	11.9254	75	11.9254	71	11.9254	71
11.9424	65	11.9424	67	11.9424	72	11.9424	76	11.9424	62	11.9424	71	11.9424	73	11.9424	61	11.9424	71	11.9424	71	11.9424	84	11.9424	66	11.9424	74
11.9594	68	11.9594	73	11.9594	66	11.9594	72	11.9594	70	11.9594	73	11.9594	62	11.9594	73	11.9594	61	11.9594	61	11.9594	82	11.9594	75	11.9594	84
11.9764	71	11.9764	81	11.9764	66	11.9764	68	11.9764	72	11.9764	66	11.9764	72	11.9764	76	11.9764	67	11.9764	67	11.9764	78	11.9764	76	11.9764	77
11.9934	65	11.9934	71	11.9934	65	11.9934	70	11.9934	71	11.9934	68	11.9934	75	11.9934	69	11.9934	67	11.9934	67	11.9934	71	11.9934	75	11.9934	70
12.0104	72	12.0104	69	12.0104	67	12.0104	69	12.0104	65	12.0104	62	12.0104	75	12.0104	73	12.0104	72	12.0104	72	12.0104	71	12.0104	71	12.0104	75
12.0274	74	12.0274	71	12.0274	66	12.0274	63	12.0274	71	12.0274	64	12.0274	80	12.0274	78	12.0274	73	12.0274	73	12.0274	69	12.0274	79	12.0274	78
12.0444	65	12.0444	69	12.0444	64	12.0444	70	12.0444	73	12.0444	61	12.0444	67	12.0444	66	12.0444	70	12.0444	70	12.0444	68	12.0444	82	12.0444	74
12.0614	69	12.0614	74	12.0614	67	12.0614	73	12.0614	67	12.0614	65	12.0614	63	12.0614	68	12.0614	76	12.0614	76	12.0614	67	12.0614	79	12.0614	75
12.0784	76	12.0784	68	12.0784	68	12.0784	74	12.0784	64	12.0784	71	12.0784	67	12.0784	73	12.0784	77	12.0784	77	12.0784	78	12.0784	90	12.0784	80
12.0954	69	12.0954	71	12.0954	63	12.0954	73	12.0954	69	12.0954	66	12.0954	76	12.0954	73	12.0954	78	12.0954	78	12.0954	78	12.0954	82	12.0954	73
12.1124	73	12.1124	69	12.1124	64	12.1124	75	12.1124	66	12.1124	66	12.1124	76	12.1124	70	12.1124	78	12.1124	78	12.1124	76	12.1124	75	12.1124	73
12.1294	78	12.1294	61	12.1294	67	12.1294	75	12.1294	64	12.1294	72	12.1294	82	12.1294	73	12.1294	93	12.1294	93	12.1294	82	12.1294	89	12.1294	84
12.1464	65	12.1464	71	12.1464	71	12.1464	75	12.1464	64	12.1464	77	12.1464	76	12.1464	74	12.1464	81	12.1464	81	12.1464	91	12.1464	91	12.1464	77
12.1634	62	12.1634	73	12.1634	63	12.1634	73	12.1634	71	12.1634	71	12.1634	75	12.1634	71	12.1634	69	12.1634	69	12.1634	79	12.1634	70	12.1634	78
12.1804	65	12.1804	70	12.1804	61	12.1804	69	12.1804	73	12.1804	68	12.1804	90	12.1804	74	12.1804	78	12.1804	78	12.1804	83	12.1804	68	12.1804	77
12.1974	77	12.1974	66	12.1974	74	12.1974	63	12.1974	74	12.1974	79	12.1974	83	12.1974	73	12.1974	86	12.1974	86	12.1974	93	12.1974	81	12.1974	81
12.2144	91	12.2144	75	12.2144	83	12.2144	72	12.2144	77	12.2144	81	12.2144	79	12.2144	86	12.2144	86	12.2144	86	12.2144	78	12.2144	83	12.2144	90
12.2314	90	12.2314	73	12.2314	77	12.2314	71	12.2314	74	12.2314	66	12.2314	72	12.2314	81	12.2314	77	12.2314	77	12.2314	81	12.2314	83	12.2314	95
12.2484	82	12.2484	69	12.2484	77	12.2484	67	12.2484	67	12.2484	72	12.2484	80	12.2484	70	12.2484	86	12.2484	86	12.2484	83	12.2484	96	12.2484	92
12.2654	88	12.2654	72	12.2654	78	12.2654	91	12.2654	72	12.2654	83	12.2654	89	12.2654	75	12.2654	87	12.2654	87	12.2654	67	12.2654	84	12.2654	87
12.2824	89	12.2824	81	12.2824	81	12.2824	84	12.2824	80	12.2824	82	12.2824	79	12.2824	75	12.2824	87	12.2824	87	12.2824	73	12.2824	72	12.2824	92
12.2994	78	12.2994	99	12.2994	73	12.2994	82	12.2994	82	12.2994	90	12.2994	79	12.2994	77	12.2994	85	12.2994	85	12.2994	87	12.2994	91	12.2994	90
12.3164	70	12.3164	80	12.3164	76	12.3164	70	12.3164	78	12.3164	83	12.3164	98	12.3164	88	12.3164	74	12.3164	74	12.3164	93	12.3164	84	12.3164	92
12.3334	83	12.3334	77	12.3334	87	12.3334	66	12.3334	87	12.3334	75	12.3334	88	12.3334	79	12.3334	86	12.3334	86	12.3334	87	12.3334	81	12.3334	91
12.3504	76	12.3504	87	12.3504	83	12.3504	90	12.3504	89	12.3504	78	12.3504	87	12.3504	70	12.3504	92	12.3504	92	12.3504	84	12.3504	97	12.3504	92
12.3674	87	12.3674	89	12.3674	86	12.3674	79	12.3674	95	12.3674	75	12.3674	100	12.3674	83	12.3674	94	12.3674	94	12.3674	97	12.3674	104	12.3674	88
12.3844	88	12.3844	85	12.3844	85	12.3844	84	12.3844	83	12.3844	86	12.3844	109	12.3844	85	12.3844	80	12.3844	80	12.3844	94	12.3844	93	12.3844	101
12.4014	102	12.4014	87	12.4014	87	12.4014	85	12.4014	99	12.4014	88	12.4014	101	12.4014	77	12.4014	109	12.4014	109	12.4014	107	12.4014	101	12.4014	104
12.4184	90	12.4184	75	12.4184	86	12.4184	96	12.4184	96	12.4184	88	12.4184	111	12.4184	82	12.4184	91	12.4184	91	12.4184	119	12.4184	100	12.4184	104
12.4354	94	12.4354	82	12.4354	79	12.4354	93	12.4354	89	12.4354	85	12.4354	122	12.4354	111	12.4354	94	12.4354	94	12.4354	108	12.4354	114	12.4354	100
12.4524	96	12.4524	87	12.4524	84	12.4524	92	12.4524	89	12.4524	88	12.4524	113	12.4524	115	12.4524	105	12.4524	105	12.4524	102	12.4524	119	12.4524	123
12.4694	100	12.4694	104	12.4694	102	12.4694	110	12.4694	98	12.4694	105	12.4694	125	12.4694	102	12.4694	120	12.4694	120	12.4694	144	12.4694	131	12.4694	123
12.4864	108	12.4864	118	12.4864	109	12.4864	116	12.4864	126	12.4864	131	12.4864	116	12.4864	112	12.4864	140	12.4864	140	12.4864	137	12.4864	119	12.4864	129
12.5034	122	12.5034	122	12.5034	114	12.5034	104	12.5034	118	12.5034	117	12.5034	168	12.5034	128	12.5034	151	12.5034	151	12.5034	141	12.5034	144	12.5034	149
12.5204	160	12.5204	111	12.5204	121	12.5204	125	12.5204	148	12.5204	144	12.5204	190	12.5204	123	12.5204	153	12.5204	153	12.5204	155	12.5204	157	12.5204	129
12.5374	157	12.5374	139	12.5374	152	12.5374	136	12.5374	182	12.5374	159	12.5374	191	12.5374	128	12.5374	167	12.5374	167	12.5374	128	12.5374	143	12.5374	149
12.5544	147	12.5544	119	12.5544	152	12.5544	138	12.5544	171	12.5544	139	12.5544	157	12.5544	90	12.5544	147	12.5544	147	12.5544	121	12.5544	126	12.5544	112
12.5714	121	12.5714	84	12.5714	120	12.5714	128	12.5714	142	12.5714	101	12.5714	120	12.5714	86	12.5714	116	12.5714	116	12.5714	117	12.5714	121	12.5714	110
12.5884	101	12.5884	97	12.5884	129	12.5884	123	12.5884	130	12.5884	97	12.5884	98	12.5884	68	12.5884	120	12.5884	120	12.5884	83	12.5884	86	12.5884	104
12.6054	78	12.6054	87	12.6054	83	12.6054	86	12.6054	116	12.6054	98	12.6054	81	12.6054	70	12.6054	79	12.6054	79	12.6054	87	12.6054	86	12.6054	105
12.6224	78	12.6224	67	12.6224	78	12.6224	74	12.6224	90	12.6224	80	12.6224	101	12.6224	74	12.6224	95	12.6224	95	12.6224	66	12.6224	76	12.6224	84
12.6394	89	12.6394	67	12.6394	61	12.6394	73	12.6394	76	12.6394	73	12.6394	72	12.6394	85	12.6394	76	12.6394	76	12.6394	69	12.6394	82	12.6394	76
12.6564	70	12.6564	67	12.6564	73	12.6564	67	12.6564	110	12.6564	74	12.6564	63	12.6564	72	12.6564	80	12.6564	80	12.6564	77	12.6564	75	12.6564	82
12.6734	67	12.6734	75	12.6734	74	12.6734	71	12.6734	68	12.6734	78	12.6734	83	12.6734	76	12.6734	72	12.6734	72	12.6734	66	12.6734	69	12.6734	77
12.6904	80	12.6904	66	12.6904	72	12.6904	71	12.6904	67	12.6904	71	12.6904	89	12.6904	61	12.6904	78	12.6904	78	12.6904	78	12.6904	71	12.6904	82
12.7074	60	12.7074	87	12.7074	75	12.7074	74	12.7074	71	12.7074	89	12.7074	87	12.7074	64	12.7074	70	12.7074	70	12.7074	89	12.7074	91	12.7074	73
12.7244	73	12.7244	67	12.7244	69	12.7244	85	12.7244	90	12.7244	75	12.7244	75	12.7244	72	12.7244	72	12.7244	72	12.7244	81	12.7244	91	12.7244	69
12.7414	62	12.7414	80	12.7414	79	12.7414	73	12.7414	64	12.7414	72	12.7414	79	12.7414	70	12.7414	66	12.7414	66	12.7414	72	12.7414	70	12.7414	73
12.7584	80	12.7584	70	12.7584	80	12.7584	68	12.7584	74	12.7584	70	12.7584	74	12.7584	55	12.7584	71	12.7584	71	12.7584	71	12.7584	75	12.7584	72
12.7754	66	12.7754	74	12.7754	77	12.7754	59	12.7754	82	12.7754	76	12.7754	86	12.7754	65	12.7754	81	12.7754	81	12.7754	78	12.7754	73	12.7754	69
12.7924	74	12.7924	76	12.7924	62	12.7924	61	12.7924	61	12.7924	66	12.7924	78	12.7924	65	12.7924	78	12.7924	78	12.7924	80	12.7924	78	12.7924	64
12.8094	69	12.8094	77	12.8094	65	12.8094	82	12.8094	67	12.8094	68	12.8094	61	12.8094	72	12.8094	74	12.8094	74	12.8094	80	12.8094	72	12.8094	69
12.8264	76	12.8264	72	12.8264	64	12.8264	88	12.8264	57	12.8264	72	12.8264	74	12.8264	72	12.8264	71	12.8264	71	12.8264	81	12.8264	71	12.8264	80
12.8434	64	12.8434	64	12.8434	56	12.8434	66	12.8434	66	12.8434	79	12.8434	80	12.8434	61	12.8434	72	12.8434	72	12.8434	69	12.8434	71	12.8434	76
12.8604	60	12.8604	65	12.8604	58	12.8604	60	12.8604	69	12.8604	75	12.8604	86	12.8604	53	12.8604	65	12.8604	65	12.8604	74	12.8604	68	12.8604	68
12.8774	59	12.8774	59	12.8774	68	12.8774	62	12.8774	65	12.8774	75	12.8774	68	12.8774	60	12.8774	75	12.8774	75	12.8774	78	12.8774	72	12.8774	74
12.8944	62	12.8944	56	12.8944	71	12.8944	62	12.8944	65	12.8944	70	12.8944	65	12.8944	63	12.8944	76	12.8944	76	12.8944	85	12.8944	75	12.8944	76
12.9114	62	12.9114	77	12.9114	68	12.9114	62	12.9114	66	12.9114	66	12.9114	73	12.9114	59	12.9114	82	12.9114	82	12.9114	72	12.9114	84	12.9114	77
12.9284	56	12.9284	68	12.9284	54	12.9284	62	12.9284	67	12.9284	61	12.9284	78	12.9284	67	12.9284	76	12.9284	76	12.9284	60	12.9284	74	12.9284	81
12.9454	63	12.9454	67	12.9454	75	12.9454	72	12.9454	77	12.9454	58	12.9454	74	12.9454	66	12.9454	72	12.9454	72	12.9454	58	12.9454	69	12.9454	79
12.9624	64	12.9624	69	12.9624	72	12.9624	67	12.9624	79	12.9624	69	12.9624	83	12.9624	69	12.9624	77	12.9624	77	12.9624	74	12.9624	73	12.9624	90
12.9794	73	12.9794	78	12.9794	72	12.9794	62	12.9794	67	12.9794	70	12.9794	74	12.9794	68	12.9794	79	12.9794	79	12.9794	78	12.9794	76	12.9794	86
12.9964	74	12.9964	75	12.9964	76	12.9964	68	12.9964	70	12.9964	66	12.9964	60	12.9964	72	12.9964	78	12.9964	78	12.9964	66	12.9964	88	12.9964	80
13.0134	70	13.0134	64	13.0134	70	13.0134	73	13.0134	74	13.0134	72	13.0134	57	13.0134	77	13.0134	84	13.0134	84	13.0134	68	13.0134	87	13.0134	81
13.0304	67	13.0304	64	13.0304	73	13.0304	65	13.0304	68	13.0304	73	13.0304	60	13.0304	73	13.0304	83	13.0304	83	13.0304	74	13.0304	81	13.0304	77
13.0474	67	13.0474	69	13.0474	75	13.0474	52	13.0474	62	13.0474	75	13.0474	69	13.0474	75	13.0474	80	13.0474	80	13.0474	75	13.0474	66	13.0474	75
13.0644	74	13.0644	71	13.0644	71	13.0644	58	13.0644	64	13.0644	67	13.0644	71	13.0644	76	13.0644	76	13.0644	76	13.0644	75	13.0644	64	13.0644	76
13.0814	72	13.0814	69	13.0814	63	13.0814	64	13.0814	72	13.0814	56	13.0814	72	13.0814	70	13.0814	68	13.0814	68	13.0814	92	13.0814	73	13.0814	86
13.0984	62	13.0984	65	13.0984	60	13.0984	72	13.0984	69	13.0984	59	13.0984	77	13.0984	68	13.0984	70	13.0984	70	13.0984	85	13.0984	73	13.0984	78
13.1154	67	13.1154	67	13.1154	66	13.1154	77	13.1154	66	13.1154	66	13.1154	77	13.1154	80	13.1154	81	13.1154	81	13.1154	68	13.1154	74	13.1154	75
13.1324	75	13.1324	70	13.1324	66	13.1324	64	13.1324	71	13.1324	68	13.1324	75	13.1324	77	13.1324	82	13.1324	82	13.1324	72	13.1324	71	13.1324	70
13.1494	66	13.1494	66	13.1494	59	13.1494	66	13.1494	69	13.1494	68	13.1494	70	13.1494	71	13.1494	74	13.1494	74	13.1494	66	13.1494	78	13.1494	63
13.1664	65	13.1664	69	13.1664	65	13.1664	63	13.1664	70	13.1664	63	13.1664	64	13.1664	70	13.1664	61	13.1664	61	13.1664	62	13.1664	74	13.1664	66
13.1834	69	13.1834	69	13.1834	69	13.1834	62	13.1834	64	13.1834	66	13.1834	61	13.1834	69	13.1834	70	13.1834	70	13.1834	73	13.1834	78	13.1834	72
13.2004	58	13.2004	74	13.2004	69	13.2004	60	13.2004	57	13.2004	57	13.2004	68	13.2004	72	13.2004	72	13.2004	72	13.2004	84	13.2004	76	13.2004	68
13.2174	60	13.2174	72	13.2174	56	13.2174	64	13.2174	62	13.2174	58	13.2174	67	13.2174	63	13.2174	75	13.2174	75	13.2174	79	13.2174	76	13.2174	61
13.2344	62	13.2344	67	13.2344	71	13.2344	75	13.2344	81	13.2344	73	13.2344	63	13.2344	70	13.2344	74	13.2344	74	13.2344	73	13.2344	79	13.2344	65
13.2514	67	13.2514	76	13.2514	73	13.2514	78	13.2514	65	13.2514	63	13.2514	71	13.2514	83	13.2514	81	13.2514	81	13.2514	80	13.2514	90	13.2514	67
13.2684	70	13.2684	81	13.2684	69	13.2684	77	13.2684	64	13.2684	62	13.2684	67	13.2684	78	13.2684	70	13.2684	70	13.2684	78	13.2684	89	13.2684	78
13.2854	67	13.2854	70	13.2854	72	13.2854	80	13.2854	66	13.2854	74	13.2854	66	13.2854	64	13.2854	66	13.2854	66	13.2854	73	13.2854	98	13.2854	80
13.3024	56	13.3024	71	13.3024	63	13.3024	81	13.3024	82	13.3024	63	13.3024	61	13.3024	70	13.3024	64	13.3024	64	13.3024	79	13.3024	91	13.3024	83
13.3194	68	13.3194	62	13.3194	75	13.3194	66	13.3194	66	13.3194	69	13.3194	64	13.3194	71	13.3194	82	13.3194	82	13.3194	80	13.3194	87	13.3194	80
13.3364	75	13.3364	64	13.3364	73	13.3364	71	13.3364	70	13.3364	68	13.3364	91	13.3364	66	13.3364	90	13.3364	90	13.3364	80	13.3364	82	13.3364	81
13.3534	70	13.3534	68	13.3534	80	13.3534	75	13.3534	68	13.3534	76	13.3534	82	13.3534	84	13.3534	91	13.3534	91	13.3534	75	13.3534	68	13.3534	98
13.3704	66	13.3704	74	13.3704	71	13.3704	69	13.3704	67	13.3704	58	13.3704	75	13.3704	63	13.3704	86	13.3704	86	13.3704	84	13.3704	70	13.3704	88
13.3874	65	13.3874	80	13.3874	70	13.3874	66	13.3874	74	13.3874	55	13.3874	83	13.3874	73	13.3874	76	13.3874	76	13.3874	65	13.3874	84	13.3874	80
13.4044	73	13.4044	61	13.4044	54	13.4044	60	13.4044	69	13.4044	68	13.4044	76	13.4044	70	13.4044	72	13.4044	72	13.4044	72	13.4044	79	13.4044	66
13.4214	72	13.4214	58	13.4214	69	13.4214	63	13.4214	71	13.4214	60	13.4214	75	13.4214	57	13.4214	81	13.4214	81	13.4214	85	13.4214	86	13.4214	77
13.4384	58	13.4384	77	13.4384	75	13.4384	74	13.4384	70	13.4384	78	13.4384	70	13.4384	63	13.4384	70	13.4384	70	13.4384	82	13.4384	77	13.4384	76
13.4554	57	13.4554	88	13.4554	69	13.4554	84	13.4554	73	13.4554	78	13.4554	74	13.4554	57	13.4554	55	13.4554	55	13.4554	83	13.4554	80	13.4554	83
13.4724	59	13.4724	79	13.4724	55	13.4724	83	13.4724	74	13.4724	54	13.4724	74	13.4724	77	13.4724	71	13.4724	71	13.4724	71	13.4724	83	13.4724	95
13.4894	65	13.4894	62	13.4894	55	13.4894	68	13.4894	80	13.4894	47	13.4894	82	13.4894	74	13.4894	80	13.4894	80	13.4894	58	13.4894	80	13.4894	79
13.5064	74	13.5064	73	13.5064	60	13.5064	70	13.5064	78	13.5064	64	13.5064	74	13.5064	66	13.5064	78	13.5064	78	13.5064	67	13.5064	83	13.5064	66
13.5234	72	13.5234	89	13.5234	61	13.5234	70	13.5234	78	13.5234	74	13.5234	80	13.5234	71	13.5234	75	13.5234	75	13.5234	74	13.5234	85	13.5234	64
13.5404	68	13.5404	61	13.5404	47	13.5404	67	13.5404	66	13.5404	81	13.5404	87	13.5404	65	13.5404	79	13.5404	79	13.5404	82	13.5404	72	13.5404	72
13.5574	65	13.5574	79	13.5574	61	13.5574	67	13.5574	75	13.5574	73	13.5574	64	13.5574	66	13.5574	68	13.5574	68	13.5574	63	13.5574	86	13.5574	72
13.5744	74	13.5744	60	13.5744	69	13.5744	67	13.5744	69	13.5744	70	13.5744	81	13.5744	88	13.5744	72	13.5744	72	13.5744	85	13.5744	95	13.5744	86
13.5914	74	13.5914	68	13.5914	61	13.5914	78	13.5914	68	13.5914	57	13.5914	65	13.5914	78	13.5914	72	13.5914	72	13.5914	85	13.5914	80	13.5914	61
13.6084	67	13.6084	69	13.6084	67	13.6084	56	13.6084	73	13.6084	57	13.6084	73	13.6084	73	13.6084	97	13.6084	97	13.6084	66	13.6084	88	13.6084	80
13.6254	75	13.6254	61	13.6254	85	13.6254	67	13.6254	70	13.6254	64	13.6254	84	13.6254	69	13.6254	84	13.6254	84	13.6254	90	13.6254	79	13.6254	80
13.6424	57	13.6424	69	13.6424	60	13.6424	78	13.6424	75	13.6424	85	13.6424	82	13.6424	83	13.6424	82	13.6424	82	13.6424	78	13.6424	87	13.6424	85
13.6594	62	13.6594	70	13.6594	67	13.6594	64	13.6594	59	13.6594	88	13.6594	72	13.6594	78	13.6594	76	13.6594	76	13.6594	80	13.6594	86	13.6594	85
13.6764	48	13.6764	75	13.6764	72	13.6764	69	13.6764	73	13.6764	74	13.6764	77	13.6764	76	13.6764	80	13.6764	80	13.6764	91	13.6764	85	13.6764	87
13.6934	59	13.6934	76	13.6934	64	13.6934	76	13.6934	67	13.6934	63	13.6934	82	13.6934	83	13.6934	73	13.6934	73	13.6934	71	13.6934	73	13.6934	73
13.7104	73	13.7104	56	13.7104	72	13.7104	77	13.7104	60	13.7104	82	13.7104	82	13.7104	77	13.7104	89	13.7104	89	13.7104	87	13.7104	76	13.7104	82
13.7274	59	13.7274	72	13.7274	71	13.7274	66	13.7274	80	13.7274	74	13.7274	77	13.7274	62	13.7274	79	13.7274	79	13.7274	78	13.7274	86	13.7274	94
13.7444	70	13.7444	65	13.7444	82	13.7444	70	13.7444	65	13.7444	70	13.7444	87	13.7444	78	13.7444	73	13.7444	73	13.7444	78	13.7444	84	13.7444	76
13.7614	78	13.7614	62	13.7614	74	13.7614	77	13.7614	74	13.7614	77	13.7614	84	13.7614	71	13.7614	66	13.7614	66	13.7614	88	13.7614	89	13.7614	63
13.7784	63	13.7784	79	13.7784	72	13.7784	78	13.7784	80	13.7784	67	13.7784	76	13.7784	85	13.7784	73	13.7784	73	13.7784	87	13.7784	81	13.7784	78
13.7954	70	13.7954	70	13.7954	75	13.7954	71	13.7954	66	13.7954	74	13.7954	71	13.7954	77	13.7954	89	13.7954	89	13.7954	72	13.7954	76	13.7954	82
13.8124	65	13.8124	68	13.8124	68	13.8124	75	13.8124	67	13.8124	87	13.8124	74	13.8124	70	13.8124	79	13.8124	79	13.8124	64	13.8124	80	13.8124	76
13.8294	65	13.8294	76	13.8294	77	13.8294	79	13.8294	63	13.8294	76	13.8294	70	13.8294	68	13.8294	88	13.8294	88	13.8294	81	13.8294	87	13.8294	83
13.8464	71	13.8464	83	13.8464	77	13.8464	68	13.8464	77	13.8464	80	13.8464	72	13.8464	81	13.8464	109	13.8464	109	13.8464	82	13.8464	90	13.8464	88
13.8634	71	13.8634	72	13.8634	74	13.8634	63	13.8634	82	13.8634	79	13.8634	74	13.8634	66	13.8634	105	13.8634	105	13.8634	83	13.8634	89	13.8634	91
13.8804	80	13.8804	76	13.8804	79	13.8804	90	13.8804	81	13.8804	75	13.8804	83	13.8804	77	13.8804	93	13.8804	93	13.8804	79	13.8804	91	13.8804	87
13.8974	85	13.8974	81	13.8974	86	13.8974	86	13.8974	79	13.8974	74	13.8974	76	13.8974	77	13.8974	89	13.8974	89	13.8974	72	13.8974	89	13.8974	100
13.9144	82	13.9144	72	13.9144	68	13.9144	63	13.9144	78	13.9144	77	13.9144	79	13.9144	80	13.9144	89	13.9144	89	13.9144	74	13.9144	80	13.9144	90
13.9314	74	13.9314	76	13.9314	62	13.9314	70	13.9314	69	13.9314	75	13.9314	84	13.9314	71	13.9314	89	13.9314	89	13.9314	77	13.9314	79	13.9314	87
13.9484	66	13.9484	76	13.9484	73	13.9484	67	13.9484	73	13.9484	66	13.9484	85	13.9484	71	13.9484	80	13.9484	80	13.9484	78	13.9484	78	13.9484	81
13.9654	74	13.9654	77	13.9654	71	13.9654	68	13.9654	71	13.9654	68	13.9654	81	13.9654	64	13.9654	81	13.9654	81	13.9654	82	13.9654	82	13.9654	79
13.9824	75	13.9824	69	13.9824	77	13.9824	65	13.9824	68	13.9824	76	13.9824	70	13.9824	52	13.9824	81	13.9824	81	13.9824	76	13.9824	79	13.9824	77
13.9994	76	13.9994	59	13.9994	67	13.9994	74	13.9994	65	13.9994	75	13.9994	78	13.9994	57	13.9994	77	13.9994	77	13.9994	73	13.9994	77	13.9994	73
14.0164	69	14.0164	69	14.0164	66	14.0164	75	14.0164	73	14.0164	67	14.0164	81	14.0164	74	14.0164	71	14.0164	71	14.0164	69	14.0164	81	14.0164	75
14.0334	64	14.0334	70	14.0334	74	14.0334	68	14.0334	71	14.0334	70	14.0334	88	14.0334	83	14.0334	75	14.0334	75	14.0334	70	14.0334	84	14.0334	85
14.0504	65	14.0504	73	14.0504	59	14.0504	64	14.0504	55	14.0504	71	14.0504	82	14.0504	75	14.0504	75	14.0504	75	14.0504	74	14.0504	87	14.0504	83
14.0674	68	14.0674	76	14.0674	62	14.0674	64	14.0674	67	14.0674	71	14.0674	65	14.0674	66	14.0674	77	14.0674	77	14.0674	78	14.0674	79	14.0674	76
14.0844	70	14.0844	69	14.0844	79	14.0844	75	14.0844	86	14.0844	71	14.0844	70	14.0844	72	14.0844	91	14.0844	91	14.0844	72	14.0844	77	14.0844	80
14.1014	76	14.1014	73	14.1014	78	14.1014	70	14.1014	81	14.1014	67	14.1014	78	14.1014	74	14.1014	89	14.1014	89	14.1014	68	14.1014	82	14.1014	76
14.1184	65	14.1184	73	14.1184	80	14.1184	65	14.1184	63	14.1184	62	14.1184	74	14.1184	64	14.1184	86	14.1184	86	14.1184	68	14.1184	77	14.1184	74
14.1354	63	14.1354	63	14.1354	78	14.1354	77	14.1354	57	14.1354	64	14.1354	72	14.1354	57	14.1354	81	14.1354	81	14.1354	77	14.1354	79	14.1354	72
14.1524	67	14.1524	71	14.1524	68	14.1524	76	14.1524	73	14.1524	70	14.1524	69	14.1524	71	14.1524	81	14.1524	81	14.1524	83	14.1524	92	14.1524	78
14.1694	65	14.1694	75	14.1694	62	14.1694	73	14.1694	70	14.1694	76	14.1694	74	14.1694	61	14.1694	88	14.1694	88	14.1694	74	14.1694	83	14.1694	85
14.1864	66	14.1864	69	14.1864	65	14.1864	69	14.1864	76	14.1864	72	14.1864	70	14.1864	58	14.1864	90	14.1864	90	14.1864	81	14.1864	78	14.1864	75
14.2034	61	14.2034	73	14.2034	68	14.2034	83	14.2034	71	14.2034	76	14.2034	66	14.2034	66	14.2034	85	14.2034	85	14.2034	80	14.2034	73	14.2034	75
14.2204	73	14.2204	77	14.2204	66	14.2204	75	14.2204	68	14.2204	75	14.2204	82	14.2204	68	14.2204	87	14.2204	87	14.2204	72	14.2204	80	14.2204	79
14.2374	82	14.2374	80	14.2374	54	14.2374	67	14.2374	72	14.2374	79	14.2374	79	14.2374	63	14.2374	79	14.2374	79	14.2374	73	14.2374	81	14.2374	91
14.2544	81	14.2544	66	14.2544	68	14.2544	71	14.2544	69	14.2544	83	14.2544	68	14.2544	66	14.2544	81	14.2544	81	14.2544	77	14.2544	83	14.2544	78
14.2714	71	14.2714	69	14.2714	57	14.2714	80	14.2714	63	14.2714	78	14.2714	75	14.2714	68	14.2714	74	14.2714	74	14.2714	74	14.2714	85	14.2714	71
14.2884	60	14.2884	71	14.2884	66	14.2884	71	14.2884	68	14.2884	83	14.2884	81	14.2884	69	14.2884	67	14.2884	67	14.2884	63	14.2884	81	14.2884	81
14.3054	71	14.3054	65	14.3054	64	14.3054	60	14.3054	69	14.3054	73	14.3054	74	14.3054	79	14.3054	82	14.3054	82	14.3054	83	14.3054	65	14.3054	74
14.3224	72	14.3224	67	14.3224	68	14.3224	70	14.3224	70	14.3224	58	14.3224	75	14.3224	74	14.3224	79	14.3224	79	14.3224	71	14.3224	78	14.3224	86
14.3394	58	14.3394	63	14.3394	73	14.3394	64	14.3394	68	14.3394	56	14.3394	81	14.3394	73	14.3394	63	14.3394	63	14.3394	79	14.3394	86	14.3394	76
14.3564	53	14.3564	79	14.3564	68	14.3564	84	14.3564	66	14.3564	70	14.3564	85	14.3564	76	14.3564	70	14.3564	70	14.3564	81	14.3564	83	14.3564	69
14.3734	62	14.3734	86	14.3734	80	14.3734	83	14.3734	76	14.3734	77	14.3734	83	14.3734	69	14.3734	94	14.3734	94	14.3734	95	14.3734	69	14.3734	75
14.3904	61	14.3904	77	14.3904	83	14.3904	80	14.3904	81	14.3904	85	14.3904	77	14.3904	85	14.3904	91	14.3904	91	14.3904	93	14.3904	74	14.3904	81
14.4074	74	14.4074	70	14.4074	76	14.4074	48	14.4074	73	14.4074	62	14.4074	74	14.4074	64	14.4074	86	14.4074	86	14.4074	80	14.4074	79	14.4074	69
14.4244	76	14.4244	71	14.4244	70	14.4244	72	14.4244	65	14.4244	68	14.4244	67	14.4244	57	14.4244	80	14.4244	80	14.4244	61	14.4244	76	14.4244	87
14.4414	72	14.4414	74	14.4414	81	14.4414	88	14.4414	70	14.4414	69	14.4414	70	14.4414	73	14.4414	75	14.4414	75	14.4414	82	14.4414	71	14.4414	84
14.4584	70	14.4584	70	14.4584	88	14.4584	80	14.4584	55	14.4584	84	14.4584	95	14.4584	73	14.4584	85	14.4584	85	14.4584	72	14.4584	83	14.4584	74
14.4754	65	14.4754	62	14.4754	84	14.4754	74	14.4754	65	14.4754	69	14.4754	77	14.4754	78	14.4754	66	14.4754	66	14.4754	62	14.4754	75	14.4754	88
14.4924	73	14.4924	79	14.4924	67	14.4924	82	14.4924	77	14.4924	78	14.4924	83	14.4924	78	14.4924	72	14.4924	72	14.4924	75	14.4924	79	14.4924	83
14.5094	66	14.5094	87	14.5094	66	14.5094	70	14.5094	68	14.5094	69	14.5094	60	14.5094	75	14.5094	67	14.5094	67	14.5094	83	14.5094	74	14.5094	80
14.5264	55	14.5264	78	14.5264	53	14.5264	82	14.5264	67	14.5264	67	14.5264	74	14.5264	75	14.5264	75	14.5264	75	14.5264	75	14.5264	82	14.5264	68
14.5434	68	14.5434	76	14.5434	69	14.5434	73	14.5434	66	14.5434	86	14.5434	76	14.5434	68	14.5434	79	14.5434	79	14.5434	70	14.5434	92	14.5434	89
14.5604	73	14.5604	66	14.5604	64	14.5604	51	14.5604	72	14.5604	57	14.5604	68	14.5604	72	14.5604	68	14.5604	68	14.5604	65	14.5604	85	14.5604	88
14.5774	53	14.5774	79	14.5774	63	14.5774	80	14.5774	61	14.5774	71	14.5774	80	14.5774	64	14.5774	95	14.5774	95	14.5774	66	14.5774	89	14.5774	73
14.5944	68	14.5944	71	14.5944	75	14.5944	66	14.5944	85	14.5944	85	14.5944	67	14.5944	86	14.5944	71	14.5944	71	14.5944	79	14.5944	74	14.5944	81
14.6114	74	14.6114	75	14.6114	81	14.6114	64	14.6114	81	14.6114	67	14.6114	81	14.6114	75	14.6114	78	14.6114	78	14.6114	84	14.6114	58	14.6114	75
14.6284	60	14.6284	75	14.6284	86	14.6284	73	14.6284	71	14.6284	60	14.6284	67	14.6284	68	14.6284	83	14.6284	83	14.6284	86	14.6284	66	14.6284	83
14.6454	75	14.6454	82	14.6454	63	14.6454	72	14.6454	80	14.6454	66	14.6454	85	14.6454	61	14.6454	65	14.6454	65	14.6454	75	14.6454	68	14.6454	88
14.6624	88	14.6624	58	14.6624	79	14.6624	71	14.6624	74	14.6624	73	14.6624	80	14.6624	74	14.6624	79	14.6624	79	14.6624	68	14.6624	64	14.6624	83
14.6794	72	14.6794	65	14.6794	78	14.6794	61	14.6794	69	14.6794	74	14.6794	77	14.6794	70	14.6794	88	14.6794	88	14.6794	76	14.6794	88	14.6794	85
14.6964	57	14.6964	68	14.6964	62	14.6964	68	14.6964	79	14.6964	70	14.6964	58	14.6964	74	14.6964	97	14.6964	97	14.6964	87	14.6964	71	14.6964	85
14.7134	71	14.7134	72	14.7134	70	14.7134	75	14.7134	67	14.7134	89	14.7134	66	14.7134	78	14.7134	94	14.7134	94	14.7134	77	14.7134	70	14.7134	92
14.7304	59	14.7304	66	14.7304	62	14.7304	75	14.7304	62	14.7304	83	14.7304	76	14.7304	71	14.7304	97	14.7304	97	14.7304	69	14.7304	79	14.7304	78
14.7474	71	14.7474	65	14.7474	72	14.7474	58	14.7474	57	14.7474	68	14.7474	82	14.7474	76	14.7474	66	14.7474	66	14.7474	71	14.7474	69	14.7474	74
14.7644	59	14.7644	65	14.7644	61	14.7644	62	14.7644	63	14.7644	72	14.7644	79	14.7644	84	14.7644	74	14.7644	74	14.7644	73	14.7644	74	14.7644	87
14.7814	70	14.7814	70	14.7814	73	14.7814	60	14.7814	74	14.7814	75	14.7814	69	14.7814	74	14.7814	74	14.7814	74	14.7814	87	14.7814	81	14.7814	81
14.7984	65	14.7984	79	14.7984	80	14.7984	77	14.7984	72	14.7984	72	14.7984	66	14.7984	53	14.7984	83	14.7984	83	14.7984	76	14.7984	79	14.7984	86
14.8154	68	14.8154	72	14.8154	72	14.8154	68	14.8154	80	14.8154	72	14.8154	70	14.8154	68	14.8154	83	14.8154	83	14.8154	73	14.8154	91	14.8154	94
14.8324	74	14.8324	69	14.8324	80	14.8324	71	14.8324	68	14.8324	75	14.8324	71	14.8324	85	14.8324	84	14.8324	84	14.8324	90	14.8324	73	14.8324	76
14.8494	72	14.8494	78	14.8494	71	14.8494	77	14.8494	72	14.8494	78	14.8494	79	14.8494	69	14.8494	85	14.8494	85	14.8494	79	14.8494	69	14.8494	69
14.8664	77	14.8664	70	14.8664	71	14.8664	81	14.8664	79	14.8664	81	14.8664	79	14.8664	68	14.8664	87	14.8664	87	14.8664	66	14.8664	87	14.8664	73
14.8834	78	14.8834	71	14.8834	68	14.8834	81	14.8834	87	14.8834	75	14.8834	89	14.8834	77	14.8834	79	14.8834	79	14.8834	77	14.8834	81	14.8834	85
14.9004	80	14.9004	76	14.9004	65	14.9004	76	14.9004	75	14.9004	70	14.9004	80	14.9004	71	14.9004	80	14.9004	80	14.9004	81	14.9004	78	14.9004	80
14.9174	72	14.9174	75	14.9174	59	14.9174	70	14.9174	65	14.9174	79	14.9174	74	14.9174	71	14.9174	84	14.9174	84	14.9174	83	14.9174	82	14.9174	85
14.9344	66	14.9344	86	14.9344	73	14.9344	71	14.9344	80	14.9344	79	14.9344	73	14.9344	74	14.9344	81	14.9344	81	14.9344	83	14.9344	82	14.9344	89
14.9514	74	14.9514	80	14.9514	80	14.9514	75	14.9514	78	14.9514	79	14.9514	70	14.9514	77	14.9514	82	14.9514	82	14.9514	79	14.9514	85	14.9514	89
14.9684	76	14.9684	80	14.9684	78	14.9684	80	14.9684	72	14.9684	76	14.9684	74	14.9684	77	14.9684	82	14.9684	82	14.9684	75	14.9684	80	14.9684	84
14.9854	76	14.9854	78	14.9854	83	14.9854	70	14.9854	69	14.9854	76	14.9854	81	14.9854	76	14.9854	80	14.9854	80	14.9854	77	14.9854	90	14.9854	84
15.0024	68	15.0024	69	15.0024	79	15.0024	77	15.0024	62	15.0024	88	15.0024	67	15.0024	80	15.0024	88	15.0024	88	15.0024	69	15.0024	97	15.0024	91
15.0194	66	15.0194	78	15.0194	73	15.0194	80	15.0194	70	15.0194	79	15.0194	64	15.0194	71	15.0194	86	15.0194	86	15.0194	67	15.0194	80	15.0194	84
15.0364	69	15.0364	77	15.0364	70	15.0364	72	15.0364	86	15.0364	69	15.0364	83	15.0364	69	15.0364	86	15.0364	86	15.0364	79	15.0364	76	15.0364	78
15.0534	62	15.0534	77	15.0534	75	15.0534	81	15.0534	70	15.0534	80	15.0534	80	15.0534	81	15.0534	79	15.0534	79	15.0534	86	15.0534	87	15.0534	81
15.0704	71	15.0704	79	15.0704	80	15.0704	73	15.0704	67	15.0704	76	15.0704	79	15.0704	88	15.0704	72	15.0704	72	15.0704	80	15.0704	81	15.0704	77
15.0874	80	15.0874	62	15.0874	69	15.0874	68	15.0874	78	15.0874	71	15.0874	85	15.0874	84	15.0874	80	15.0874	80	15.0874	76	15.0874	82	15.0874	77
15.1044	73	15.1044	62	15.1044	71	15.1044	80	15.1044	79	15.1044	73	15.1044	80	15.1044	78	15.1044	84	15.1044	84	15.1044	72	15.1044	86	15.1044	77
15.1214	71	15.1214	85	15.1214	74	15.1214	71	15.1214	69	15.1214	76	15.1214	77	15.1214	73	15.1214	80	15.1214	80	15.1214	69	15.1214	84	15.1214	73
15.1384	69	15.1384	84	15.1384	82	15.1384	64	15.1384	69	15.1384	69	15.1384	73	15.1384	71	15.1384	82	15.1384	82	15.1384	69	15.1384	90	15.1384	73
15.1554	64	15.1554	74	15.1554	74	15.1554	67	15.1554	69	15.1554	64	15.1554	70	15.1554	69	15.1554	73	15.1554	73	15.1554	69	15.1554	90	15.1554	88
15.1724	73	15.1724	63	15.1724	76	15.1724	74	15.1724	74	15.1724	79	15.1724	77	15.1724	70	15.1724	79	15.1724	79	15.1724	75	15.1724	84	15.1724	89
15.1894	77	15.1894	66	15.1894	68	15.1894	84	15.1894	64	15.1894	78	15.1894	77	15.1894	67	15.1894	84	15.1894	84	15.1894	89	15.1894	85	15.1894	82
15.2064	69	15.2064	76	15.2064	69	15.2064	75	15.2064	68	15.2064	83	15.2064	71	15.2064	75	15.2064	87	15.2064	87	15.2064	79	15.2064	81	15.2064	81
15.2234	75	15.2234	70	15.2234	70	15.2234	72	15.2234	67	15.2234	82	15.2234	73	15.2234	77	15.2234	75	15.2234	75	15.2234	79	15.2234	89	15.2234	86
15.2404	72	15.2404	81	15.2404	76	15.2404	69	15.2404	74	15.2404	82	15.2404	75	15.2404	72	15.2404	73	15.2404	73	15.2404	75	15.2404	84	15.2404	83
15.2574	69	15.2574	74	15.2574	75	15.2574	67	15.2574	63	15.2574	83	15.2574	70	15.2574	75	15.2574	84	15.2574	84	15.2574	74	15.2574	82	15.2574	82
15.2744	84	15.2744	65	15.2744	69	15.2744	84	15.2744	67	15.2744	68	15.2744	65	15.2744	60	15.2744	94	15.2744	94	15.2744	76	15.2744	92	15.2744	95
15.2914	79	15.2914	72	15.2914	70	15.2914	79	15.2914	71	15.2914	74	15.2914	71	15.2914	70	15.2914	91	15.2914	91	15.2914	87	15.2914	82	15.2914	98
15.3084	71	15.3084	82	15.3084	72	15.3084	78	15.3084	71	15.3084	74	15.3084	77	15.3084	73	15.3084	85	15.3084	85	15.3084	89	15.3084	86	15.3084	92
15.3254	66	15.3254	82	15.3254	67	15.3254	72	15.3254	73	15.3254	74	15.3254	67	15.3254	63	15.3254	76	15.3254	76	15.3254	71	15.3254	85	15.3254	82
15.3424	66	15.3424	64	15.3424	69	15.3424	68	15.3424	85	15.3424	73	15.3424	79	15.3424	66	15.3424	81	15.3424	81	15.3424	74	15.3424	71	15.3424	70
15.3594	64	15.3594	79	15.3594	65	15.3594	69	15.3594	71	15.3594	80	15.3594	90	15.3594	77	15.3594	76	15.3594	76	15.3594	76	15.3594	70	15.3594	74
15.3764	77	15.3764	75	15.3764	65	15.3764	88	15.3764	76	15.3764	81	15.3764	96	15.3764	84	15.3764	76	15.3764	76	15.3764	63	15.3764	79	15.3764	85
15.3934	67	15.3934	72	15.3934	71	15.3934	67	15.3934	75	15.3934	75	15.3934	65	15.3934	88	15.3934	75	15.3934	75	15.3934	80	15.3934	78	15.3934	68
15.4104	63	15.4104	83	15.4104	74	15.4104	74	15.4104	85	15.4104	85	15.4104	77	15.4104	79	15.4104	74	15.4104	74	15.4104	77	15.4104	90	15.4104	71
15.4274	54	15.4274	65	15.4274	81	15.4274	83	15.4274	75	15.4274	86	15.4274	79	15.4274	80	15.4274	89	15.4274	89	15.4274	81	15.4274	88	15.4274	75
15.4444	63	15.4444	78	15.4444	72	15.4444	55	15.4444	82	15.4444	74	15.4444	73	15.4444	81	15.4444	87	15.4444	87	15.4444	88	15.4444	71	15.4444	80
15.4614	66	15.4614	75	15.4614	65	15.4614	51	15.4614	67	15.4614	79	15.4614	73	15.4614	65	15.4614	85	15.4614	85	15.4614	75	15.4614	82	15.4614	75
15.4784	65	15.4784	78	15.4784	73	15.4784	73	15.4784	71	15.4784	80	15.4784	76	15.4784	86	15.4784	97	15.4784	97	15.4784	78	15.4784	97	15.4784	68
15.4954	55	15.4954	74	15.4954	66	15.4954	71	15.4954	73	15.4954	75	15.4954	69	15.4954	73	15.4954	86	15.4954	86	15.4954	68	15.4954	83	15.4954	99
15.5124	69	15.5124	57	15.5124	88	15.5124	64	15.5124	85	15.5124	63	15.5124	60	15.5124	75	15.5124	82	15.5124	82	15.5124	90	15.5124	87	15.5124	71
15.5294	67	15.5294	71	15.5294	63	15.5294	69	15.5294	83	15.5294	81	15.5294	79	15.5294	60	15.5294	66	15.5294	66	15.5294	79	15.5294	90	15.5294	92
15.5464	73	15.5464	83	15.5464	75	15.5464	75	15.5464	76	15.5464	81	15.5464	79	15.5464	76	15.5464	80	15.5464	80	15.5464	72	15.5464	78	15.5464	90
15.5634	61	15.5634	75	15.5634	74	15.5634	63	15.5634	64	15.5634	71	15.5634	79	15.5634	67	15.5634	86	15.5634	86	15.5634	69	15.5634	79	15.5634	87
15.5804	71	15.5804	73	15.5804	67	15.5804	74	15.5804	70	15.5804	84	15.5804	83	15.5804	53	15.5804	97	15.5804	97	15.5804	69	15.5804	80	15.5804	93
15.5974	73	15.5974	67	15.5974	70	15.5974	83	15.5974	83	15.5974	68	15.5974	78	15.5974	70	15.5974	87	15.5974	87	15.5974	73	15.5974	97	15.5974	73
15.6144	82	15.6144	82	15.6144	65	15.6144	74	15.6144	70	15.6144	78	15.6144	74	15.6144	91	15.6144	74	15.6144	74	15.6144	85	15.6144	74	15.6144	89
15.6314	80	15.6314	77	15.6314	79	15.6314	68	15.6314	72	15.6314	65	15.6314	68	15.6314	74	15.6314	86	15.6314	86	15.6314	80	15.6314	81	15.6314	61
15.6484	74	15.6484	67	15.6484	78	15.6484	74	15.6484	80	15.6484	66	15.6484	79	15.6484	65	15.6484	90	15.6484	90	15.6484	88	15.6484	78	15.6484	66
15.6654	71	15.6654	76	15.6654	77	15.6654	81	15.6654	75	15.6654	81	15.6654	75	15.6654	81	15.6654	91	15.6654	91	15.6654	75	15.6654	91	15.6654	81
15.6824	80	15.6824	77	15.6824	73	15.6824	69	15.6824	76	15.6824	77	15.6824	76	15.6824	73	15.6824	101	15.6824	101	15.6824	87	15.6824	87	15.6824	77
15.6994	73	15.6994	62	15.6994	77	15.6994	82	15.6994	62	15.6994	74	15.6994	88	15.6994	81	15.6994	96	15.6994	96	15.6994	92	15.6994	80	15.6994	87
15.7164	71	15.7164	77	15.7164	73	15.7164	81	15.7164	73	15.7164	83	15.7164	92	15.7164	79	15.7164	94	15.7164	94	15.7164	68	15.7164	81	15.7164	89
15.7334	76	15.7334	82	15.7334	79	15.7334	78	15.7334	81	15.7334	84	15.7334	78	15.7334	81	15.7334	79	15.7334	79	15.7334	72	15.7334	89	15.7334	87
15.7504	69	15.7504	68	15.7504	63	15.7504	75	15.7504	78	15.7504	82	15.7504	72	15.7504	81	15.7504	77	15.7504	77	15.7504	85	15.7504	89	15.7504	85
15.7674	72	15.7674	71	15.7674	77	15.7674	53	15.7674	74	15.7674	76	15.7674	86	15.7674	77	15.7674	93	15.7674	93	15.7674	88	15.7674	90	15.7674	83
15.7844	82	15.7844	77	15.7844	69	15.7844	82	15.7844	77	15.7844	87	15.7844	79	15.7844	60	15.7844	86	15.7844	86	15.7844	75	15.7844	92	15.7844	89
15.8014	61	15.8014	85	15.8014	71	15.8014	88	15.8014	85	15.8014	87	15.8014	78	15.8014	74	15.8014	79	15.8014	79	15.8014	74	15.8014	87	15.8014	84
15.8184	50	15.8184	78	15.8184	73	15.8184	87	15.8184	73	15.8184	80	15.8184	84	15.8184	83	15.8184	75	15.8184	75	15.8184	71	15.8184	90	15.8184	85
15.8354	56	15.8354	74	15.8354	75	15.8354	80	15.8354	83	15.8354	67	15.8354	81	15.8354	72	15.8354	85	15.8354	85	15.8354	79	15.8354	81	15.8354	87
15.8524	71	15.8524	84	15.8524	76	15.8524	71	15.8524	88	15.8524	70	15.8524	87	15.8524	71	15.8524	84	15.8524	84	15.8524	78	15.8524	83	15.8524	82
15.8694	83	15.8694	78	15.8694	67	15.8694	80	15.8694	90	15.8694	73	15.8694	83	15.8694	77	15.8694	88	15.8694	88	15.8694	77	15.8694	80	15.8694	84
15.8864	76	15.8864	71	15.8864	74	15.8864	78	15.8864	101	15.8864	77	15.8864	73	15.8864	72	15.8864	95	15.8864	95	15.8864	76	15.8864	84	15.8864	83
15.9034	80	15.9034	76	15.9034	77	15.9034	86	15.9034	91	15.9034	77	15.9034	75	15.9034	82	15.9034	96	15.9034	96	15.9034	75	15.9034	95	15.9034	88
15.9204	78	15.9204	75	15.9204	83	15.9204	80	15.9204	79	15.9204	75	15.9204	74	15.9204	71	15.9204	91	15.9204	91	15.9204	84	15.9204	103	15.9204	82
15.9374	82	15.9374	75	15.9374	84	15.9374	81	15.9374	73	15.9374	70	15.9374	72	15.9374	57	15.9374	93	15.9374	93	15.9374	82	15.9374	94	15.9374	82
15.9544	74	15.9544	74	15.9544	70	15.9544	72	15.9544	71	15.9544	78	15.9544	82	15.9544	62	15.9544	85	15.9544	85	15.9544	81	15.9544	90	15.9544	84
15.9714	76	15.9714	72	15.9714	61	15.9714	71	15.9714	77	15.9714	82	15.9714	87	15.9714	73	15.9714	84	15.9714	84	15.9714	94	15.9714	84	15.9714	85
15.9884	83	15.9884	80	15.9884	83	15.9884	84	15.9884	76	15.9884	84	15.9884	76	15.9884	78	15.9884	86	15.9884	86	15.9884	82	15.9884	85	15.9884	82
16.0054	77	16.0054	70	16.0054	90	16.0054	69	16.0054	73	16.0054	83	16.0054	73	16.0054	78	16.0054	80	16.0054	80	16.0054	79	16.0054	96	16.0054	81
16.0224	80	16.0224	67	16.0224	81	16.0224	62	16.0224	72	16.0224	82	16.0224	77	16.0224	79	16.0224	80	16.0224	80	16.0224	87	16.0224	94	16.0224	81
16.0394	84	16.0394	76	16.0394	81	16.0394	71	16.0394	75	16.0394	76	16.0394	88	16.0394	80	16.0394	83	16.0394	83	16.0394	85	16.0394	90	16.0394	87
16.0564	85	16.0564	75	16.0564	73	16.0564	78	16.0564	73	16.0564	75	16.0564	76	16.0564	71	16.0564	91	16.0564	91	16.0564	69	16.0564	86	16.0564	92
16.0734	78	16.0734	72	16.0734	68	16.0734	74	16.0734	77	16.0734	83	16.0734	67	16.0734	78	16.0734	89	16.0734	89	16.0734	76	16.0734	81	16.0734	86
16.0904	78	16.0904	73	16.0904	70	16.0904	66	16.0904	74	16.0904	78	16.0904	72	16.0904	81	16.0904	74	16.0904	74	16.0904	87	16.0904	82	16.0904	84
16.1074	77	16.1074	72	16.1074	61	16.1074	74	16.1074	57	16.1074	70	16.1074	78	16.1074	74	16.1074	77	16.1074	77	16.1074	80	16.1074	85	16.1074	71
16.1244	73	16.1244	58	16.1244	67	16.1244	93	16.1244	69	16.1244	79	16.1244	80	16.1244	70	16.1244	93	16.1244	93	16.1244	85	16.1244	82	16.1244	67
16.1414	87	16.1414	69	16.1414	79	16.1414	85	16.1414	84	16.1414	72	16.1414	74	16.1414	77	16.1414	94	16.1414	94	16.1414	87	16.1414	78	16.1414	76
16.1584	83	16.1584	71	16.1584	73	16.1584	78	16.1584	79	16.1584	65	16.1584	80	16.1584	65	16.1584	88	16.1584	88	16.1584	84	16.1584	75	16.1584	86
16.1754	83	16.1754	80	16.1754	78	16.1754	87	16.1754	82	16.1754	76	16.1754	85	16.1754	68	16.1754	82	16.1754	82	16.1754	76	16.1754	82	16.1754	94
16.1924	83	16.1924	80	16.1924	89	16.1924	89	16.1924	87	16.1924	79	16.1924	80	16.1924	90	16.1924	95	16.1924	95	16.1924	85	16.1924	85	16.1924	86
16.2094	69	16.2094	67	16.2094	91	16.2094	76	16.2094	78	16.2094	69	16.2094	79	16.2094	78	16.2094	83	16.2094	83	16.2094	74	16.2094	83	16.2094	84
16.2264	86	16.2264	57	16.2264	83	16.2264	74	16.2264	82	16.2264	64	16.2264	84	16.2264	72	16.2264	64	16.2264	64	16.2264	81	16.2264	88	16.2264	89
16.2434	77	16.2434	68	16.2434	77	16.2434	78	16.2434	83	16.2434	74	16.2434	70	16.2434	90	16.2434	89	16.2434	89	16.2434	97	16.2434	89	16.2434	86
16.2604	79	16.2604	79	16.2604	68	16.2604	72	16.2604	81	16.2604	85	16.2604	69	16.2604	78	16.2604	85	16.2604	85	16.2604	90	16.2604	84	16.2604	85
16.2774	88	16.2774	79	16.2774	71	16.2774	84	16.2774	79	16.2774	78	16.2774	82	16.2774	74	16.2774	79	16.2774	79	16.2774	96	16.2774	97	16.2774	90
16.2944	77	16.2944	74	16.2944	79	16.2944	84	16.2944	81	16.2944	93	16.2944	72	16.2944	70	16.2944	77	16.2944	77	16.2944	80	16.2944	93	16.2944	77
16.3114	84	16.3114	72	16.3114	76	16.3114	81	16.3114	76	16.3114	80	16.3114	71	16.3114	92	16.3114	76	16.3114	76	16.3114	82	16.3114	78	16.3114	67
16.3284	85	16.3284	91	16.3284	75	16.3284	68	16.3284	77	16.3284	80	16.3284	69	16.3284	78	16.3284	82	16.3284	82	16.3284	83	16.3284	77	16.3284	93
16.3454	72	16.3454	77	16.3454	77	16.3454	89	16.3454	83	16.3454	69	16.3454	70	16.3454	98	16.3454	90	16.3454	90	16.3454	74	16.3454	70	16.3454	93
16.3624	68	16.3624	80	16.3624	67	16.3624	69	16.3624	87	16.3624	78	16.3624	78	16.3624	74	16.3624	83	16.3624	83	16.3624	81	16.3624	86	16.3624	95
16.3794	61	16.3794	92	16.3794	61	16.3794	85	16.3794	86	16.3794	84	16.3794	95	16.3794	84	16.3794	73	16.3794	73	16.3794	84	16.3794	86	16.3794	74
16.3964	70	16.3964	63	16.3964	83	16.3964	81	16.3964	66	16.3964	81	16.3964	72	16.3964	73	16.3964	82	16.3964	82	16.3964	86	16.3964	74	16.3964	79
16.4134	81	16.4134	54	16.4134	79	16.4134	76	16.4134	70	16.4134	80	16.4134	89	16.4134	89	16.4134	87	16.4134	87	16.4134	82	16.4134	88	16.4134	100
16.4304	82	16.4304	69	16.4304	76	16.4304	75	16.4304	71	16.4304	82	16.4304	77	16.4304	75	16.4304	80	16.4304	80	16.4304	80	16.4304	103	16.4304	89
16.4474	74	16.4474	89	16.4474	68	16.4474	67	16.4474	68	16.4474	89	16.4474	72	16.4474	95	16.4474	102	16.4474	102	16.4474	89	16.4474	89	16.4474	99
16.4644	73	16.4644	85	16.4644	74	16.4644	72	16.4644	78	16.4644	63	16.4644	87	16.4644	86	16.4644	81	16.4644	81	16.4644	95	16.4644	79	16.4644	88
16.4814	76	16.4814	74	16.4814	73	16.4814	83	16.4814	65	16.4814	71	16.4814	74	16.4814	82	16.4814	93	16.4814	93	16.4814	86	16.4814	81	16.4814	86
16.4984	72	16.4984	97	16.4984	80	16.4984	90	16.4984	71	16.4984	85	16.4984	70	16.4984	75	16.4984	104	16.4984	104	16.4984	105	16.4984	85	16.4984	65
16.5154	73	16.5154	66	16.5154	88	16.5154	91	16.5154	80	16.5154	79	16.5154	75	16.5154	89	16.5154	65	16.5154	65	16.5154	86	16.5154	84	16.5154	84
16.5324	74	16.5324	72	16.5324	73	16.5324	66	16.5324	60	16.5324	88	16.5324	79	16.5324	85	16.5324	83	16.5324	83	16.5324	86	16.5324	106	16.5324	83
16.5494	67	16.5494	75	16.5494	87	16.5494	80	16.5494	83	16.5494	88	16.5494	82	16.5494	70	16.5494	81	16.5494	81	16.5494	85	16.5494	67	16.5494	96
16.5664	80	16.5664	82	16.5664	82	16.5664	69	16.5664	73	16.5664	66	16.5664	91	16.5664	70	16.5664	88	16.5664	88	16.5664	74	16.5664	78	16.5664	82
16.5834	82	16.5834	75	16.5834	63	16.5834	76	16.5834	72	16.5834	71	16.5834	73	16.5834	84	16.5834	86	16.5834	86	16.5834	87	16.5834	119	16.5834	76
16.6004	84	16.6004	89	16.6004	71	16.6004	84	16.6004	70	16.6004	80	16.6004	87	16.6004	73	16.6004	105	16.6004	105	16.6004	75	16.6004	95	16.6004	92
16.6174	74	16.6174	81	16.6174	79	16.6174	93	16.6174	92	16.6174	60	16.6174	97	16.6174	83	16.6174	85	16.6174	85	16.6174	75	16.6174	68	16.6174	89
16.6344	62	16.6344	77	16.6344	67	16.6344	81	16.6344	87	16.6344	81	16.6344	76	16.6344	74	16.6344	85	16.6344	85	16.6344	94	16.6344	72	16.6344	94
16.6514	71	16.6514	69	16.6514	69	16.6514	89	16.6514	78	16.6514	72	16.6514	85	16.6514	70	16.6514	81	16.6514	81	16.6514	92	16.6514	75	16.6514	96
16.6684	84	16.6684	78	16.6684	83	16.6684	88	16.6684	61	16.6684	75	16.6684	66	16.6684	73	16.6684	81	16.6684	81	16.6684	97	16.6684	88	16.6684	96
16.6854	65	16.6854	80	16.6854	71	16.6854	74	16.6854	81	16.6854	73	16.6854	79	16.6854	93	16.6854	84	16.6854	84	16.6854	90	16.6854	106	16.6854	93
16.7024	72	16.7024	81	16.7024	81	16.7024	74	16.7024	74	16.7024	77	16.7024	83	16.7024	84	16.7024	81	16.7024	81	16.7024	84	16.7024	97	16.7024	73
16.7194	88	16.7194	65	16.7194	73	16.7194	76	16.7194	76	16.7194	80	16.7194	81	16.7194	74	16.7194	79	16.7194	79	16.7194	94	16.7194	84	16.7194	100
16.7364	67	16.7364	69	16.7364	75	16.7364	76	16.7364	74	16.7364	75	16.7364	82	16.7364	74	16.7364	97	16.7364	97	16.7364	82	16.7364	84	16.7364	99
16.7534	80	16.7534	85	16.7534	84	16.7534	82	16.7534	62	16.7534	81	16.7534	81	16.7534	92	16.7534	89	16.7534	89	16.7534	61	16.7534	79	16.7534	91
16.7704	76	16.7704	82	16.7704	74	16.7704	77	16.7704	79	16.7704	80	16.7704	79	16.7704	74	16.7704	84	16.7704	84	16.7704	75	16.7704	91	16.7704	96
16.7874	75	16.7874	76	16.7874	72	16.7874	82	16.7874	80	16.7874	73	16.7874	92	16.7874	69	16.7874	73	16.7874	73	16.7874	72	16.7874	89	16.7874	88
16.8044	74	16.8044	76	16.8044	80	16.8044	84	16.8044	61	16.8044	74	16.8044	82	16.8044	65	16.8044	93	16.8044	93	16.8044	92	16.8044	85	16.8044	79
16.8214	86	16.8214	71	16.8214	82	16.8214	82	16.8214	65	16.8214	85	16.8214	78	16.8214	75	16.8214	83	16.8214	83	16.8214	86	16.8214	94	16.8214	83
16.8384	90	16.8384	73	16.8384	83	16.8384	86	16.8384	66	16.8384	82	16.8384	82	16.8384	81	16.8384	88	16.8384	88	16.8384	90	16.8384	88	16.8384	92
16.8554	71	16.8554	71	16.8554	88	16.8554	76	16.8554	71	16.8554	74	16.8554	98	16.8554	78	16.8554	83	16.8554	83	16.8554	93	16.8554	88	16.8554	98
16.8724	77	16.8724	73	16.8724	84	16.8724	70	16.8724	85	16.8724	79	16.8724	88	16.8724	91	16.8724	87	16.8724	87	16.8724	85	16.8724	89	16.8724	98
16.8894	71	16.8894	84	16.8894	78	16.8894	74	16.8894	87	16.8894	81	16.8894	83	16.8894	98	16.8894	94	16.8894	94	16.8894	93	16.8894	94	16.8894	95
16.9064	75	16.9064	86	16.9064	84	16.9064	80	16.9064	76	16.9064	81	16.9064	80	16.9064	95	16.9064	91	16.9064	91	16.9064	91	16.9064	96	16.9064	101
16.9234	77	16.9234	64	16.9234	74	16.9234	85	16.9234	75	16.9234	82	16.9234	80	16.9234	80	16.9234	81	16.9234	81	16.9234	86	16.9234	96	16.9234	90
16.9404	83	16.9404	81	16.9404	72	16.9404	86	16.9404	76	16.9404	91	16.9404	81	16.9404	75	16.9404	85	16.9404	85	16.9404	83	16.9404	89	16.9404	94
16.9574	90	16.9574	79	16.9574	72	16.9574	95	16.9574	82	16.9574	87	16.9574	78	16.9574	75	16.9574	83	16.9574	83	16.9574	85	16.9574	95	16.9574	78
16.9744	89	16.9744	72	16.9744	73	16.9744	90	16.9744	84	16.9744	76	16.9744	80	16.9744	75	16.9744	88	16.9744	88	16.9744	91	16.9744	90	16.9744	83
16.9914	77	16.9914	75	16.9914	81	16.9914	77	16.9914	82	16.9914	79	16.9914	76	16.9914	74	16.9914	95	16.9914	95	16.9914	81	16.9914	80	16.9914	92
17.0084	71	17.0084	83	17.0084	81	17.0084	72	17.0084	71	17.0084	77	17.0084	73	17.0084	79	17.0084	88	17.0084	88	17.0084	84	17.0084	78	17.0084	91
17.0254	70	17.0254	87	17.0254	80	17.0254	72	17.0254	68	17.0254	70	17.0254	77	17.0254	88	17.0254	83	17.0254	83	17.0254	94	17.0254	86	17.0254	96
17.0424	60	17.0424	89	17.0424	86	17.0424	78	17.0424	80	17.0424	81	17.0424	85	17.0424	94	17.0424	91	17.0424	91	17.0424	94	17.0424	95	17.0424	95
17.0594	67	17.0594	81	17.0594	81	17.0594	84	17.0594	81	17.0594	92	17.0594	88	17.0594	82	17.0594	86	17.0594	86	17.0594	97	17.0594	88	17.0594	92
17.0764	73	17.0764	75	17.0764	72	17.0764	77	17.0764	72	17.0764	92	17.0764	87	17.0764	71	17.0764	87	17.0764	87	17.0764	100	17.0764	88	17.0764	93
17.0934	80	17.0934	77	17.0934	71	17.0934	74	17.0934	81	17.0934	79	17.0934	86	17.0934	72	17.0934	81	17.0934	81	17.0934	82	17.0934	88	17.0934	97
17.1104	85	17.1104	73	17.1104	82	17.1104	84	17.1104	75	17.1104	69	17.1104	90	17.1104	73	17.1104	79	17.1104	79	17.1104	86	17.1104	84	17.1104	86
17.1274	80	17.1274	69	17.1274	88	17.1274	91	17.1274	80	17.1274	78	17.1274	90	17.1274	81	17.1274	83	17.1274	83	17.1274	86	17.1274	88	17.1274	92
17.1444	81	17.1444	81	17.1444	84	17.1444	69	17.1444	82	17.1444	81	17.1444	85	17.1444	81	17.1444	91	17.1444	91	17.1444	86	17.1444	96	17.1444	92
17.1614	71	17.1614	80	17.1614	77	17.1614	73	17.1614	90	17.1614	85	17.1614	75	17.1614	81	17.1614	87	17.1614	87	17.1614	89	17.1614	100	17.1614	85
17.1784	76	17.1784	84	17.1784	77	17.1784	99	17.1784	85	17.1784	93	17.1784	73	17.1784	84	17.1784	74	17.1784	74	17.1784	89	17.1784	85	17.1784	83
17.1954	71	17.1954	82	17.1954	73	17.1954	87	17.1954	82	17.1954	85	17.1954	78	17.1954	73	17.1954	85	17.1954	85	17.1954	88	17.1954	96	17.1954	93
17.2124	73	17.2124	75	17.2124	67	17.2124	84	17.2124	80	17.2124	76	17.2124	80	17.2124	70	17.2124	100	17.2124	100	17.2124	93	17.2124	89	17.2124	95
17.2294	70	17.2294	78	17.2294	83	17.2294	92	17.2294	68	17.2294	78	17.2294	73	17.2294	77	17.2294	105	17.2294	105	17.2294	105	17.2294	98	17.2294	99
17.2464	69	17.2464	83	17.2464	89	17.2464	92	17.2464	78	17.2464	76	17.2464	70	17.2464	77	17.2464	88	17.2464	88	17.2464	89	17.2464	88	17.2464	91
17.2634	83	17.2634	77	17.2634	80	17.2634	86	17.2634	78	17.2634	82	17.2634	92	17.2634	75	17.2634	98	17.2634	98	17.2634	92	17.2634	92	17.2634	89
17.2804	78	17.2804	86	17.2804	85	17.2804	81	17.2804	74	17.2804	72	17.2804	74	17.2804	79	17.2804	106	17.2804	106	17.2804	83	17.2804	99	17.2804	84
17.2974	84	17.2974	75	17.2974	77	17.2974	70	17.2974	71	17.2974	71	17.2974	84	17.2974	80	17.2974	106	17.2974	106	17.2974	89	17.2974	97	17.2974	76
17.3144	82	17.3144	91	17.3144	74	17.3144	77	17.3144	72	17.3144	82	17.3144	83	17.3144	72	17.3144	95	17.3144	95	17.3144	95	17.3144	90	17.3144	92
17.3314	77	17.3314	81	17.3314	76	17.3314	95	17.3314	83	17.3314	82	17.3314	89	17.3314	68	17.3314	91	17.3314	91	17.3314	89	17.3314	106	17.3314	90
17.3484	78	17.3484	75	17.3484	74	17.3484	90	17.3484	82	17.3484	89	17.3484	77	17.3484	90	17.3484	99	17.3484	99	17.3484	85	17.3484	81	17.3484	90
17.3654	80	17.3654	71	17.3654	72	17.3654	86	17.3654	91	17.3654	70	17.3654	85	17.3654	83	17.3654	85	17.3654	85	17.3654	84	17.3654	98	17.3654	81
17.3824	78	17.3824	77	17.3824	79	17.3824	88	17.3824	70	17.3824	85	17.3824	86	17.3824	75	17.3824	86	17.3824	86	17.3824	85	17.3824	79	17.3824	97
17.3994	84	17.3994	71	17.3994	84	17.3994	85	17.3994	81	17.3994	83	17.3994	90	17.3994	90	17.3994	81	17.3994	81	17.3994	79	17.3994	85	17.3994	83
17.4164	81	17.4164	80	17.4164	100	17.4164	80	17.4164	89	17.4164	79	17.4164	82	17.4164	105	17.4164	85	17.4164	85	17.4164	94	17.4164	89	17.4164	98
17.4334	79	17.4334	95	17.4334	78	17.4334	81	17.4334	92	17.4334	72	17.4334	85	17.4334	103	17.4334	110	17.4334	110	17.4334	91	17.4334	94	17.4334	87
17.4504	78	17.4504	74	17.4504	73	17.4504	95	17.4504	73	17.4504	72	17.4504	81	17.4504	71	17.4504	72	17.4504	72	17.4504	71	17.4504	99	17.4504	71
17.4674	81	17.4674	90	17.4674	86	17.4674	84	17.4674	88	17.4674	76	17.4674	80	17.4674	84	17.4674	96	17.4674	96	17.4674	93	17.4674	96	17.4674	103
17.4844	99	17.4844	84	17.4844	85	17.4844	111	17.4844	84	17.4844	91	17.4844	86	17.4844	104	17.4844	95	17.4844	95	17.4844	103	17.4844	95	17.4844	102
17.5014	73	17.5014	74	17.5014	87	17.5014	90	17.5014	80	17.5014	66	17.5014	90	17.5014	74	17.5014	96	17.5014	96	17.5014	98	17.5014	98	17.5014	98
17.5184	88	17.5184	83	17.5184	66	17.5184	99	17.5184	71	17.5184	73	17.5184	82	17.5184	79	17.5184	96	17.5184	96	17.5184	104	17.5184	91	17.5184	87
17.5354	76	17.5354	83	17.5354	89	17.5354	83	17.5354	87	17.5354	84	17.5354	84	17.5354	76	17.5354	80	17.5354	80	17.5354	92	17.5354	87	17.5354	96
17.5524	67	17.5524	91	17.5524	91	17.5524	109	17.5524	72	17.5524	79	17.5524	89	17.5524	67	17.5524	96	17.5524	96	17.5524	94	17.5524	117	17.5524	88
17.5694	68	17.5694	87	17.5694	91	17.5694	89	17.5694	99	17.5694	103	17.5694	71	17.5694	87	17.5694	109	17.5694	109	17.5694	80	17.5694	98	17.5694	103
17.5864	78	17.5864	94	17.5864	89	17.5864	102	17.5864	82	17.5864	76	17.5864	80	17.5864	95	17.5864	105	17.5864	105	17.5864	90	17.5864	102	17.5864	94
17.6034	79	17.6034	87	17.6034	101	17.6034	97	17.6034	85	17.6034	89	17.6034	77	17.6034	103	17.6034	115	17.6034	115	17.6034	118	17.6034	105	17.6034	112
17.6204	85	17.6204	82	17.6204	91	17.6204	83	17.6204	105	17.6204	84	17.6204	101	17.6204	101	17.6204	91	17.6204	91	17.6204	112	17.6204	108	17.6204	100
17.6374	86	17.6374	77	17.6374	88	17.6374	105	17.6374	89	17.6374	105	17.6374	102	17.6374	84	17.6374	110	17.6374	110	17.6374	97	17.6374	101	17.6374	102
17.6544	82	17.6544	94	17.6544	93	17.6544	84	17.6544	76	17.6544	92	17.6544	91	17.6544	90	17.6544	102	17.6544	102	17.6544	107	17.6544	110	17.6544	93
17.6714	96	17.6714	90	17.6714	86	17.6714	100	17.6714	90	17.6714	103	17.6714	89	17.6714	86	17.6714	118	17.6714	118	17.6714	116	17.6714	109	17.6714	114
17.6884	100	17.6884	88	17.6884	86	17.6884	104	17.6884	91	17.6884	92	17.6884	101	17.6884	112	17.6884	113	17.6884	113	17.6884	111	17.6884	97	17.6884	121
17.7054	102	17.7054	105	17.7054	89	17.7054	107	17.7054	102	17.7054	99	17.7054	99	17.7054	100	17.7054	99	17.7054	99	17.7054	104	17.7054	109	17.7054	121
17.7224	112	17.7224	106	17.7224	104	17.7224	112	17.7224	103	17.7224	106	17.7224	102	17.7224	102	17.7224	117	17.7224	117	17.7224	120	17.7224	121	17.7224	109
17.7394	112	17.7394	101	17.7394	108	17.7394	114	17.7394	112	17.7394	122	17.7394	145	17.7394	121	17.7394	122	17.7394	122	17.7394	121	17.7394	128	17.7394	99
17.7564	119	17.7564	136	17.7564	100	17.7564	114	17.7564	113	17.7564	108	17.7564	125	17.7564	133	17.7564	132	17.7564	132	17.7564	125	17.7564	127	17.7564	125
17.7734	125	17.7734	126	17.7734	106	17.7734	109	17.7734	122	17.7734	100	17.7734	137	17.7734	143	17.7734	154	17.7734	154	17.7734	152	17.7734	136	17.7734	119
17.7904	122	17.7904	103	17.7904	116	17.7904	117	17.7904	134	17.7904	118	17.7904	140	17.7904	138	17.7904	145	17.7904	145	17.7904	173	17.7904	137	17.7904	127
17.8074	123	17.8074	114	17.8074	115	17.8074	125	17.8074	154	17.8074	127	17.8074	159	17.8074	132	17.8074	153	17.8074	153	17.8074	160	17.8074	166	17.8074	137
17.8244	136	17.8244	138	17.8244	133	17.8244	133	17.8244	153	17.8244	124	17.8244	176	17.8244	127	17.8244	157	17.8244	157	17.8244	149	17.8244	165	17.8244	124
17.8414	160	17.8414	131	17.8414	130	17.8414	143	17.8414	167	17.8414	121	17.8414	176	17.8414	112	17.8414	133	17.8414	133	17.8414	147	17.8414	146	17.8414	140
17.8584	153	17.8584	107	17.8584	115	17.8584	137	17.8584	151	17.8584	125	17.8584	165	17.8584	109	17.8584	128	17.8584	128	17.8584	138	17.8584	137	17.8584	141
17.8754	125	17.8754	100	17.8754	104	17.8754	127	17.8754	132	17.8754	118	17.8754	146	17.8754	97	17.8754	120	17.8754	120	17.8754	133	17.8754	137	17.8754	126
17.8924	105	17.8924	100	17.8924	108	17.8924	112	17.8924	119	17.8924	92	17.8924	139	17.8924	91	17.8924	118	17.8924	118	17.8924	130	17.8924	126	17.8924	118
17.9094	98	17.9094	102	17.9094	92	17.9094	106	17.9094	122	17.9094	81	17.9094	119	17.9094	88	17.9094	116	17.9094	116	17.9094	110	17.9094	114	17.9094	112
17.9264	93	17.9264	101	17.9264	92	17.9264	101	17.9264	116	17.9264	88	17.9264	108	17.9264	88	17.9264	115	17.9264	115	17.9264	99	17.9264	108	17.9264	97
17.9434	88	17.9434	81	17.9434	101	17.9434	94	17.9434	98	17.9434	92	17.9434	107	17.9434	90	17.9434	92	17.9434	92	17.9434	106	17.9434	102	17.9434	94
17.9604	86	17.9604	87	17.9604	93	17.9604	84	17.9604	105	17.9604	88	17.9604	105	17.9604	84	17.9604	92	17.9604	92	17.9604	112	17.9604	97	17.9604	97
17.9774	94	17.9774	83	17.9774	80	17.9774	85	17.9774	92	17.9774	91	17.9774	96	17.9774	88	17.9774	98	17.9774	98	17.9774	99	17.9774	83	17.9774	93
17.9944	90	17.9944	75	17.9944	79	17.9944	90	17.9944	77	17.9944	95	17.9944	90	17.9944	87	17.9944	100	17.9944	100	17.9944	98	17.9944	85	17.9944	98
18.0114	93	18.0114	85	18.0114	84	18.0114	95	18.0114	77	18.0114	92	18.0114	83	18.0114	77	18.0114	110	18.0114	110	18.0114	100	18.0114	100	18.0114	97
18.0284	94	18.0284	96	18.0284	84	18.0284	89	18.0284	85	18.0284	97	18.0284	90	18.0284	83	18.0284	103	18.0284	103	18.0284	98	18.0284	97	18.0284	82
18.0454	82	18.0454	92	18.0454	82	18.0454	84	18.0454	87	18.0454	93	18.0454	90	18.0454	90	18.0454	86	18.0454	86	18.0454	95	18.0454	91	18.0454	84
18.0624	74	18.0624	85	18.0624	77	18.0624	94	18.0624	88	18.0624	88	18.0624	83	18.0624	88	18.0624	82	18.0624	82	18.0624	98	18.0624	98	18.0624	89
18.0794	83	18.0794	81	18.0794	68	18.0794	82	18.0794	90	18.0794	94	18.0794	77	18.0794	93	18.0794	91	18.0794	91	18.0794	96	18.0794	108	18.0794	90
18.0964	87	18.0964	80	18.0964	72	18.0964	75	18.0964	101	18.0964	92	18.0964	77	18.0964	108	18.0964	99	18.0964	99	18.0964	102	18.0964	109	18.0964	100
18.1134	85	18.1134	76	18.1134	82	18.1134	81	18.1134	92	18.1134	78	18.1134	93	18.1134	90	18.1134	95	18.1134	95	18.1134	91	18.1134	103	18.1134	115
18.1304	93	18.1304	89	18.1304	79	18.1304	78	18.1304	84	18.1304	68	18.1304	88	18.1304	78	18.1304	89	18.1304	89	18.1304	90	18.1304	99	18.1304	121
18.1474	98	18.1474	83	18.1474	90	18.1474	89	18.1474	88	18.1474	79	18.1474	83	18.1474	77	18.1474	95	18.1474	95	18.1474	100	18.1474	106	18.1474	104
18.1644	93	18.1644	78	18.1644	90	18.1644	102	18.1644	83	18.1644	79	18.1644	80	18.1644	79	18.1644	94	18.1644	94	18.1644	98	18.1644	95	18.1644	96
18.1814	82	18.1814	82	18.1814	87	18.1814	104	18.1814	83	18.1814	90	18.1814	87	18.1814	70	18.1814	94	18.1814	94	18.1814	105	18.1814	90	18.1814	102
18.1984	79	18.1984	91	18.1984	88	18.1984	91	18.1984	85	18.1984	78	18.1984	90	18.1984	70	18.1984	95	18.1984	95	18.1984	100	18.1984	91	18.1984	101
18.2154	90	18.2154	96	18.2154	84	18.2154	76	18.2154	98	18.2154	77	18.2154	79	18.2154	84	18.2154	110	18.2154	110	18.2154	103	18.2154	96	18.2154	97
18.2324	95	18.2324	93	18.2324	83	18.2324	85	18.2324	91	18.2324	72	18.2324	86	18.2324	79	18.2324	111	18.2324	111	18.2324	85	18.2324	97	18.2324	91
18.2494	89	18.2494	89	18.2494	93	18.2494	82	18.2494	86	18.2494	93	18.2494	95	18.2494	83	18.2494	99	18.2494	99	18.2494	86	18.2494	112	18.2494	70
18.2664	77	18.2664	93	18.2664	85	18.2664	82	18.2664	92	18.2664	77	18.2664	92	18.2664	99	18.2664	99	18.2664	99	18.2664	101	18.2664	109	18.2664	88
18.2834	69	18.2834	87	18.2834	96	18.2834	93	18.2834	90	18.2834	87	18.2834	69	18.2834	97	18.2834	98	18.2834	98	18.2834	85	18.2834	105	18.2834	91
18.3004	68	18.3004	100	18.3004	80	18.3004	89	18.3004	80	18.3004	86	18.3004	78	18.3004	85	18.3004	100	18.3004	100	18.3004	86	18.3004	102	18.3004	91
18.3174	85	18.3174	91	18.3174	89	18.3174	88	18.3174	85	18.3174	90	18.3174	85	18.3174	101	18.3174	118	18.3174	118	18.3174	110	18.3174	97	18.3174	101
18.3344	82	18.3344	81	18.3344	89	18.3344	100	18.3344	95	18.3344	95	18.3344	94	18.3344	87	18.3344	101	18.3344	101	18.3344	94	18.3344	101	18.3344	106
18.3514	73	18.3514	80	18.3514	85	18.3514	89	18.3514	91	18.3514	89	18.3514	96	18.3514	75	18.3514	111	18.3514	111	18.3514	88	18.3514	101	18.3514	107
18.3684	78	18.3684	96	18.3684	82	18.3684	83	18.3684	101	18.3684	84	18.3684	90	18.3684	73	18.3684	84	18.3684	84	18.3684	99	18.3684	97	18.3684	101
18.3854	84	18.3854	92	18.3854	87	18.3854	75	18.3854	79	18.3854	87	18.3854	94	18.3854	86	18.3854	91	18.3854	91	18.3854	108	18.3854	108	18.3854	104
18.4024	82	18.4024	109	18.4024	83	18.4024	90	18.4024	80	18.4024	77	18.4024	102	18.4024	104	18.4024	85	18.4024	85	18.4024	110	18.4024	95	18.4024	90
18.4194	89	18.4194	85	18.4194	80	18.4194	94	18.4194	86	18.4194	76	18.4194	99	18.4194	98	18.4194	91	18.4194	91	18.4194	107	18.4194	89	18.4194	79
18.4364	101	18.4364	95	18.4364	78	18.4364	86	18.4364	70	18.4364	85	18.4364	90	18.4364	84	18.4364	82	18.4364	82	18.4364	95	18.4364	120	18.4364	89
18.4534	86	18.4534	82	18.4534	75	18.4534	105	18.4534	113	18.4534	90	18.4534	99	18.4534	94	18.4534	109	18.4534	109	18.4534	103	18.4534	118	18.4534	102
18.4704	72	18.4704	86	18.4704	85	18.4704	91	18.4704	97	18.4704	71	18.4704	97	18.4704	75	18.4704	95	18.4704	95	18.4704	103	18.4704	111	18.4704	117
18.4874	83	18.4874	78	18.4874	82	18.4874	88	18.4874	106	18.4874	86	18.4874	96	18.4874	94	18.4874	107	18.4874	107	18.4874	107	18.4874	111	18.4874	88
18.5044	98	18.5044	90	18.5044	104	18.5044	99	18.5044	85	18.5044	100	18.5044	81	18.5044	86	18.5044	111	18.5044	111	18.5044	98	18.5044	112	18.5044	80
18.5214	90	18.5214	83	18.5214	83	18.5214	95	18.5214	84	18.5214	80	18.5214	107	18.5214	85	18.5214	90	18.5214	90	18.5214	107	18.5214	86	18.5214	100
18.5384	86	18.5384	93	18.5384	85	18.5384	71	18.5384	72	18.5384	94	18.5384	96	18.5384	84	18.5384	93	18.5384	93	18.5384	97	18.5384	106	18.5384	90
18.5554	87	18.5554	72	18.5554	90	18.5554	104	18.5554	77	18.5554	101	18.5554	90	18.5554	87	18.5554	101	18.5554	101	18.5554	89	18.5554	102	18.5554	112
18.5724	85	18.5724	84	18.5724	76	18.5724	100	18.5724	87	18.5724	97	18.5724	94	18.5724	74	18.5724	86	18.5724	86	18.5724	92	18.5724	99	18.5724	99
18.5894	89	18.5894	82	18.5894	89	18.5894	85	18.5894	74	18.5894	90	18.5894	91	18.5894	73	18.5894	94	18.5894	94	18.5894	115	18.5894	101	18.5894	95
18.6064	80	18.6064	85	18.6064	71	18.6064	87	18.6064	91	18.6064	95	18.6064	90	18.6064	84	18.6064	120	18.6064	120	18.6064	107	18.6064	91	18.6064	100
18.6234	77	18.6234	81	18.6234	77	18.6234	88	18.6234	90	18.6234	87	18.6234	96	18.6234	91	18.6234	96	18.6234	96	18.6234	112	18.6234	99	18.6234	92
18.6404	90	18.6404	82	18.6404	82	18.6404	100	18.6404	92	18.6404	95	18.6404	90	18.6404	90	18.6404	99	18.6404	99	18.6404	99	18.6404	119	18.6404	117
18.6574	80	18.6574	87	18.6574	83	18.6574	95	18.6574	80	18.6574	96	18.6574	100	18.6574	83	18.6574	97	18.6574	97	18.6574	105	18.6574	123	18.6574	124
18.6744	79	18.6744	88	18.6744	81	18.6744	91	18.6744	89	18.6744	81	18.6744	90	18.6744	89	18.6744	94	18.6744	94	18.6744	100	18.6744	111	18.6744	103
18.6914	84	18.6914	91	18.6914	85	18.6914	100	18.6914	95	18.6914	90	18.6914	102	18.6914	82	18.6914	104	18.6914	104	18.6914	102	18.6914	106	18.6914	119
18.7084	89	18.7084	90	18.7084	87	18.7084	90	18.7084	105	18.7084	90	18.7084	101	18.7084	99	18.7084	108	18.7084	108	18.7084	109	18.7084	104	18.7084	111
18.7254	95	18.7254	90	18.7254	94	18.7254	105	18.7254	98	18.7254	104	18.7254	95	18.7254	105	18.7254	111	18.7254	111	18.7254	105	18.7254	102	18.7254	104
18.7424	82	18.7424	97	18.7424	100	18.7424	112	18.7424	96	18.7424	85	18.7424	115	18.7424	99	18.7424	103	18.7424	103	18.7424	107	18.7424	97	18.7424	108
18.7594	90	18.7594	106	18.7594	96	18.7594	94	18.7594	88	18.7594	82	18.7594	121	18.7594	101	18.7594	110	18.7594	110	18.7594	120	18.7594	91	18.7594	106
18.7764	104	18.7764	107	18.7764	102	18.7764	102	18.7764	95	18.7764	94	18.7764	109	18.7764	92	18.7764	109	18.7764	109	18.7764	123	18.7764	114	18.7764	103
18.7934	105	18.7934	97	18.7934	114	18.7934	94	18.7934	124	18.7934	112	18.7934	109	18.7934	84	18.7934	113	18.7934	113	18.7934	132	18.7934	110	18.7934	103
18.8104	109	18.8104	93	18.8104	110	18.8104	102	18.8104	120	18.8104	116	18.8104	116	18.8104	85	18.8104	131	18.8104	131	18.8104	139	18.8104	117	18.8104	106
18.8274	106	18.8274	99	18.8274	104	18.8274	113	18.8274	108	18.8274	116	18.8274	117	18.8274	92	18.8274	124	18.8274	124	18.8274	127	18.8274	133	18.8274	120
18.8444	118	18.8444	107	18.8444	115	18.8444	108	18.8444	114	18.8444	118	18.8444	121	18.8444	90	18.8444	124	18.8444	124	18.8444	122	18.8444	137	18.8444	127
18.8614	115	18.8614	96	18.8614	118	18.8614	94	18.8614	108	18.8614	109	18.8614	128	18.8614	95	18.8614	130	18.8614	130	18.8614	111	18.8614	132	18.8614	116
18.8784	96	18.8784	100	18.8784	121	18.8784	96	18.8784	108	18.8784	99	18.8784	118	18.8784	101	18.8784	122	18.8784	122	18.8784	105	18.8784	131	18.8784	116
18.8954	97	18.8954	103	18.8954	119	18.8954	93	18.8954	103	18.8954	101	18.8954	113	18.8954	97	18.8954	110	18.8954	110	18.8954	106	18.8954	123	18.8954	110
18.9124	101	18.9124	96	18.9124	96	18.9124	94	18.9124	96	18.9124	92	18.9124	98	18.9124	91	18.9124	105	18.9124	105	18.9124	103	18.9124	107	18.9124	101
18.9294	102	18.9294	87	18.9294	84	18.9294	91	18.9294	97	18.9294	81	18.9294	95	18.9294	96	18.9294	102	18.9294	102	18.9294	101	18.9294	109	18.9294	115
18.9464	88	18.9464	91	18.9464	88	18.9464	84	18.9464	95	18.9464	91	18.9464	102	18.9464	85	18.9464	101	18.9464	101	18.9464	102	18.9464	104	18.9464	119
18.9634	81	18.9634	90	18.9634	107	18.9634	91	18.9634	99	18.9634	89	18.9634	100	18.9634	86	18.9634	99	18.9634	99	18.9634	90	18.9634	108	18.9634	107
18.9804	77	18.9804	89	18.9804	107	18.9804	90	18.9804	91	18.9804	81	18.9804	104	18.9804	93	18.9804	99	18.9804	99	18.9804	94	18.9804	103	18.9804	92
18.9974	90	18.9974	91	18.9974	105	18.9974	97	18.9974	90	18.9974	85	18.9974	95	18.9974	91	18.9974	100	18.9974	100	18.9974	98	18.9974	101	18.9974	90
19.0144	99	19.0144	89	19.0144	103	19.0144	108	19.0144	87	19.0144	93	19.0144	89	19.0144	85	19.0144	113	19.0144	113	19.0144	94	19.0144	100	19.0144	104
19.0314	97	19.0314	95	19.0314	92	19.0314	101	19.0314	85	19.0314	91	19.0314	104	19.0314	86	19.0314	114	19.0314	114	19.0314	102	19.0314	98	19.0314	113
19.0484	97	19.0484	91	19.0484	92	19.0484	93	19.0484	88	19.0484	104	19.0484	93	19.0484	87	19.0484	108	19.0484	108	19.0484	100	19.0484	103	19.0484	102
19.0654	90	19.0654	99	19.0654	100	19.0654	97	19.0654	91	19.0654	103	19.0654	93	19.0654	95	19.0654	114	19.0654	114	19.0654	92	19.0654	126	19.0654	96
19.0824	83	19.0824	90	19.0824	98	19.0824	100	19.0824	91	19.0824	103	19.0824	86	19.0824	92	19.0824	107	19.0824	107	19.0824	89	19.0824	125	19.0824	103
19.0994	85	19.0994	104	19.0994	90	19.0994	114	19.0994	100	19.0994	102	19.0994	101	19.0994	97	19.0994	109	19.0994	109	19.0994	113	19.0994	113	19.0994	111
19.1164	96	19.1164	106	19.1164	93	19.1164	110	19.1164	94	19.1164	91	19.1164	98	19.1164	92	19.1164	112	19.1164	112	19.1164	118	19.1164	108	19.1164	112
19.1334	101	19.1334	102	19.1334	99	19.1334	100	19.1334	88	19.1334	103	19.1334	94	19.1334	93	19.1334	98	19.1334	98	19.1334	121	19.1334	111	19.1334	108
19.1504	90	19.1504	91	19.1504	88	19.1504	86	19.1504	109	19.1504	104	19.1504	103	19.1504	93	19.1504	103	19.1504	103	19.1504	116	19.1504	124	19.1504	104
19.1674	93	19.1674	89	19.1674	92	19.1674	93	19.1674	111	19.1674	102	19.1674	95	19.1674	110	19.1674	109	19.1674	109	19.1674	114	19.1674	137	19.1674	106
19.1844	87	19.1844	86	19.1844	83	19.1844	102	19.1844	101	19.1844	102	19.1844	94	19.1844	96	19.1844	108	19.1844	108	19.1844	125	19.1844	122	19.1844	108
19.2014	77	19.2014	102	19.2014	108	19.2014	96	19.2014	99	19.2014	87	19.2014	103	19.2014	102	19.2014	110	19.2014	110	19.2014	117	19.2014	115	19.2014	121
19.2184	80	19.2184	100	19.2184	116	19.2184	100	19.2184	101	19.2184	98	19.2184	98	19.2184	94	19.2184	101	19.2184	101	19.2184	129	19.2184	115	19.2184	116
19.2354	89	19.2354	114	19.2354	101	19.2354	105	19.2354	97	19.2354	105	19.2354	103	19.2354	108	19.2354	110	19.2354	110	19.2354	122	19.2354	99	19.2354	107
19.2524	87	19.2524	104	19.2524	99	19.2524	103	19.2524	98	19.2524	97	19.2524	99	19.2524	107	19.2524	120	19.2524	120	19.2524	108	19.2524	107	19.2524	121
19.2694	101	19.2694	104	19.2694	106	19.2694	105	19.2694	97	19.2694	113	19.2694	103	19.2694	107	19.2694	112	19.2694	112	19.2694	114	19.2694	111	19.2694	134
19.2864	103	19.2864	111	19.2864	99	19.2864	94	19.2864	108	19.2864	112	19.2864	111	19.2864	102	19.2864	129	19.2864	129	19.2864	118	19.2864	135	19.2864	119
19.3034	108	19.3034	126	19.3034	107	19.3034	101	19.3034	98	19.3034	87	19.3034	90	19.3034	96	19.3034	137	19.3034	137	19.3034	139	19.3034	140	19.3034	139
19.3204	96	19.3204	99	19.3204	107	19.3204	117	19.3204	105	19.3204	98	19.3204	102	19.3204	104	19.3204	127	19.3204	127	19.3204	129	19.3204	122	19.3204	136
19.3374	95	19.3374	97	19.3374	97	19.3374	97	19.3374	116	19.3374	114	19.3374	126	19.3374	111	19.3374	131	19.3374	131	19.3374	117	19.3374	120	19.3374	121
19.3544	82	19.3544	113	19.3544	112	19.3544	121	19.3544	114	19.3544	105	19.3544	102	19.3544	102	19.3544	118	19.3544	118	19.3544	143	19.3544	131	19.3544	126
19.3714	84	19.3714	129	19.3714	94	19.3714	114	19.3714	107	19.3714	105	19.3714	99	19.3714	91	19.3714	104	19.3714	104	19.3714	98	19.3714	127	19.3714	128
19.3884	107	19.3884	103	19.3884	98	19.3884	110	19.3884	103	19.3884	109	19.3884	137	19.3884	105	19.3884	114	19.3884	114	19.3884	109	19.3884	111	19.3884	125
19.4054	111	19.4054	103	19.4054	98	19.4054	105	19.4054	114	19.4054	102	19.4054	123	19.4054	98	19.4054	114	19.4054	114	19.4054	131	19.4054	119	19.4054	106
19.4224	116	19.4224	112	19.4224	119	19.4224	119	19.4224	116	19.4224	91	19.4224	104	19.4224	138	19.4224	148	19.4224	148	19.4224	123	19.4224	134	19.4224	134
19.4394	116	19.4394	100	19.4394	116	19.4394	121	19.4394	104	19.4394	121	19.4394	129	19.4394	104	19.4394	127	19.4394	127	19.4394	113	19.4394	129	19.4394	134
19.4564	105	19.4564	121	19.4564	113	19.4564	118	19.4564	98	19.4564	102	19.4564	113	19.4564	119	19.4564	130	19.4564	130	19.4564	131	19.4564	120	19.4564	128
19.4734	119	19.4734	123	19.4734	120	19.4734	120	19.4734	112	19.4734	116	19.4734	115	19.4734	138	19.4734	143	19.4734	143	19.4734	136	19.4734	128	19.4734	150
19.4904	121	19.4904	111	19.4904	100	19.4904	112	19.4904	115	19.4904	115	19.4904	117	19.4904	134	19.4904	144	19.4904	144	19.4904	136	19.4904	122	19.4904	128
19.5074	106	19.5074	114	19.5074	112	19.5074	112	19.5074	115	19.5074	126	19.5074	118	19.5074	121	19.5074	125	19.5074	125	19.5074	143	19.5074	136	19.5074	135
19.5244	124	19.5244	101	19.5244	109	19.5244	127	19.5244	107	19.5244	132	19.5244	107	19.5244	120	19.5244	130	19.5244	130	19.5244	158	19.5244	131	19.5244	122
19.5414	137	19.5414	108	19.5414	117	19.5414	135	19.5414	121	19.5414	120	19.5414	133	19.5414	102	19.5414	141	19.5414	141	19.5414	149	19.5414	138	19.5414	129
19.5584	138	19.5584	115	19.5584	118	19.5584	119	19.5584	133	19.5584	134	19.5584	133	19.5584	130	19.5584	151	19.5584	151	19.5584	149	19.5584	137	19.5584	151
19.5754	134	19.5754	118	19.5754	121	19.5754	119	19.5754	138	19.5754	120	19.5754	140	19.5754	141	19.5754	137	19.5754	137	19.5754	155	19.5754	177	19.5754	130
19.5924	134	19.5924	132	19.5924	116	19.5924	135	19.5924	141	19.5924	122	19.5924	126	19.5924	143	19.5924	157	19.5924	157	19.5924	144	19.5924	148	19.5924	140
19.6094	118	19.6094	119	19.6094	128	19.6094	136	19.6094	138	19.6094	120	19.6094	135	19.6094	129	19.6094	150	19.6094	150	19.6094	140	19.6094	144	19.6094	153
19.6264	128	19.6264	136	19.6264	136	19.6264	127	19.6264	129	19.6264	133	19.6264	148	19.6264	119	19.6264	171	19.6264	171	19.6264	143	19.6264	140	19.6264	163
19.6434	146	19.6434	112	19.6434	143	19.6434	127	19.6434	148	19.6434	152	19.6434	152	19.6434	141	19.6434	190	19.6434	190	19.6434	157	19.6434	164	19.6434	171
19.6604	152	19.6604	138	19.6604	146	19.6604	148	19.6604	155	19.6604	143	19.6604	164	19.6604	157	19.6604	173	19.6604	173	19.6604	167	19.6604	167	19.6604	176
19.6774	147	19.6774	129	19.6774	144	19.6774	133	19.6774	153	19.6774	145	19.6774	165	19.6774	144	19.6774	157	19.6774	157	19.6774	180	19.6774	165	19.6774	184
19.6944	147	19.6944	140	19.6944	147	19.6944	142	19.6944	168	19.6944	157	19.6944	149	19.6944	162	19.6944	171	19.6944	171	19.6944	177	19.6944	189	19.6944	176
19.7114	150	19.7114	148	19.7114	153	19.7114	156	19.7114	166	19.7114	163	19.7114	170	19.7114	176	19.7114	186	19.7114	186	19.7114	184	19.7114	174	19.7114	187
19.7284	156	19.7284	150	19.7284	164	19.7284	183	19.7284	161	19.7284	177	19.7284	158	19.7284	170	19.7284	201	19.7284	201	19.7284	179	19.7284	178	19.7284	174
19.7454	151	19.7454	162	19.7454	160	19.7454	189	19.7454	154	19.7454	161	19.7454	160	19.7454	186	19.7454	181	19.7454	181	19.7454	168	19.7454	191	19.7454	177
19.7624	172	19.7624	166	19.7624	161	19.7624	179	19.7624	177	19.7624	154	19.7624	165	19.7624	185	19.7624	189	19.7624	189	19.7624	178	19.7624	190	19.7624	182
19.7794	165	19.7794	173	19.7794	171	19.7794	175	19.7794	166	19.7794	161	19.7794	179	19.7794	176	19.7794	191	19.7794	191	19.7794	184	19.7794	190	19.7794	180
19.7964	156	19.7964	179	19.7964	180	19.7964	174	19.7964	154	19.7964	183	19.7964	165	19.7964	183	19.7964	197	19.7964	197	19.7964	180	19.7964	194	19.7964	189
19.8134	179	19.8134	164	19.8134	176	19.8134	161	19.8134	180	19.8134	210	19.8134	158	19.8134	188	19.8134	210	19.8134	210	19.8134	206	19.8134	187	19.8134	195
19.8304	190	19.8304	176	19.8304	179	19.8304	181	19.8304	189	19.8304	184	19.8304	185	19.8304	184	19.8304	208	19.8304	208	19.8304	205	19.8304	204	19.8304	191
19.8474	168	19.8474	171	19.8474	190	19.8474	185	19.8474	184	19.8474	172	19.8474	186	19.8474	178	19.8474	204	19.8474	204	19.8474	189	19.8474	198	19.8474	187
19.8644	183	19.8644	159	19.8644	194	19.8644	182	19.8644	180	19.8644	164	19.8644	179	19.8644	195	19.8644	199	19.8644	199	19.8644	186	19.8644	200	19.8644	194
19.8814	194	19.8814	155	19.8814	197	19.8814	180	19.8814	171	19.8814	167	19.8814	202	19.8814	182	19.8814	197	19.8814	197	19.8814	204	19.8814	210	19.8814	194
19.8984	190	19.8984	154	19.8984	167	19.8984	161	19.8984	171	19.8984	181	19.8984	196	19.8984	189	19.8984	195	19.8984	195	19.8984	185	19.8984	196	19.8984	195
19.9154	165	19.9154	173	19.9154	163	19.9154	159	19.9154	156	19.9154	182	19.9154	182	19.9154	182	19.9154	198	19.9154	198	19.9154	166	19.9154	178	19.9154	193
19.9324	159	19.9324	166	19.9324	161	19.9324	174	19.9324	151	19.9324	159	19.9324	188	19.9324	151	19.9324	195	19.9324	195	19.9324	175	19.9324	180	19.9324	182
19.9494	163	19.9494	144	19.9494	169	19.9494	160	19.9494	158	19.9494	140	19.9494	161	19.9494	149	19.9494	180	19.9494	180	19.9494	166	19.9494	183	19.9494	181
19.9664	147	19.9664	140	19.9664	165	19.9664	144	19.9664	167	19.9664	141	19.9664	141	19.9664	158	19.9664	180	19.9664	180	19.9664	166	19.9664	180	19.9664	178
19.9834	140	19.9834	133	19.9834	145	19.9834	146	19.9834	157	19.9834	153	19.9834	145	19.9834	147	19.9834	162	19.9834	162	19.9834	175	19.9834	163	19.9834	187
20.0004	135	20.0004	139	20.0004	127	20.0004	152	20.0004	146	20.0004	151	20.0004	144	20.0004	142	20.0004	137	20.0004	137	20.0004	158	20.0004	175	20.0004	186
20.0174	127	20.0174	139	20.0174	129	20.0174	134	20.0174	150	20.0174	142	20.0174	147	20.0174	145	20.0174	134	20.0174	134	20.0174	150	20.0174	177	20.0174	183
20.0344	132	20.0344	134	20.0344	128	20.0344	133	20.0344	136	20.0344	133	20.0344	131	20.0344	138	20.0344	147	20.0344	147	20.0344	140	20.0344	161	20.0344	160
20.0514	136	20.0514	131	20.0514	136	20.0514	136	20.0514	116	20.0514	139	20.0514	135	20.0514	128	20.0514	132	20.0514	132	20.0514	136	20.0514	151	20.0514	139
20.0684	130	20.0684	136	20.0684	135	20.0684	137	20.0684	115	20.0684	155	20.0684	143	20.0684	141	20.0684	129	20.0684	129	20.0684	143	20.0684	140	20.0684	151
20.0854	137	20.0854	129	20.0854	132	20.0854	136	20.0854	123	20.0854	138	20.0854	145	20.0854	129	20.0854	136	20.0854	136	20.0854	139	20.0854	130	20.0854	154
20.1024	123	20.1024	135	20.1024	120	20.1024	127	20.1024	129	20.1024	129	20.1024	121	20.1024	135	20.1024	144	20.1024	144	20.1024	151	20.1024	141	20.1024	142
20.1194	126	20.1194	130	20.1194	126	20.1194	129	20.1194	122	20.1194	114	20.1194	133	20.1194	143	20.1194	144	20.1194	144	20.1194	145	20.1194	164	20.1194	122
20.1364	119	20.1364	130	20.1364	111	20.1364	130	20.1364	132	20.1364	112	20.1364	137	20.1364	134	20.1364	147	20.1364	147	20.1364	153	20.1364	157	20.1364	129
20.1534	135	20.1534	123	20.1534	103	20.1534	141	20.1534	141	20.1534	134	20.1534	129	20.1534	120	20.1534	143	20.1534	143	20.1534	168	20.1534	139	20.1534	144
20.1704	120	20.1704	119	20.1704	117	20.1704	131	20.1704	134	20.1704	133	20.1704	126	20.1704	116	20.1704	133	20.1704	133	20.1704	157	20.1704	154	20.1704	132
20.1874	119	20.1874	122	20.1874	140	20.1874	115	20.1874	124	20.1874	130	20.1874	127	20.1874	128	20.1874	152	20.1874	152	20.1874	143	20.1874	153	20.1874	154
20.2044	127	20.2044	127	20.2044	129	20.2044	122	20.2044	120	20.2044	128	20.2044	127	20.2044	138	20.2044	135	20.2044	135	20.2044	147	20.2044	140	20.2044	164
20.2214	120	20.2214	115	20.2214	133	20.2214	115	20.2214	130	20.2214	132	20.2214	110	20.2214	125	20.2214	115	20.2214	115	20.2214	141	20.2214	145	20.2214	148
20.2384	124	20.2384	122	20.2384	126	20.2384	138	20.2384	123	20.2384	117	20.2384	110	20.2384	122	20.2384	142	20.2384	142	20.2384	138	20.2384	150	20.2384	129
20.2554	123	20.2554	101	20.2554	125	20.2554	137	20.2554	147	20.2554	118	20.2554	132	20.2554	114	20.2554	138	20.2554	138	20.2554	130	20.2554	128	20.2554	116
20.2724	129	20.2724	111	20.2724	117	20.2724	132	20.2724	124	20.2724	112	20.2724	139	20.2724	136	20.2724	142	20.2724	142	20.2724	130	20.2724	137	20.2724	125
20.2894	114	20.2894	101	20.2894	118	20.2894	120	20.2894	142	20.2894	104	20.2894	133	20.2894	128	20.2894	142	20.2894	142	20.2894	130	20.2894	149	20.2894	131
20.3064	109	20.3064	87	20.3064	128	20.3064	126	20.3064	127	20.3064	114	20.3064	111	20.3064	116	20.3064	148	20.3064	148	20.3064	118	20.3064	146	20.3064	147
20.3234	125	20.3234	117	20.3234	105	20.3234	122	20.3234	141	20.3234	129	20.3234	110	20.3234	137	20.3234	130	20.3234	130	20.3234	138	20.3234	143	20.3234	153
20.3404	115	20.3404	109	20.3404	128	20.3404	134	20.3404	124	20.3404	126	20.3404	128	20.3404	114	20.3404	131	20.3404	131	20.3404	141	20.3404	131	20.3404	136
20.3574	128	20.3574	121	20.3574	104	20.3574	151	20.3574	107	20.3574	129	20.3574	125	20.3574	132	20.3574	139	20.3574	139	20.3574	127	20.3574	137	20.3574	141
20.3744	109	20.3744	108	20.3744	118	20.3744	131	20.3744	135	20.3744	123	20.3744	104	20.3744	128	20.3744	124	20.3744	124	20.3744	142	20.3744	143	20.3744	143
20.3914	110	20.3914	129	20.3914	105	20.3914	142	20.3914	115	20.3914	123	20.3914	135	20.3914	120	20.3914	134	20.3914	134	20.3914	131	20.3914	140	20.3914	178
20.4084	116	20.4084	136	20.4084	120	20.4084	142	20.4084	114	20.4084	107	20.4084	113	20.4084	115	20.4084	144	20.4084	144	20.4084	142	20.4084	118	20.4084	130
20.4254	120	20.4254	120	20.4254	112	20.4254	117	20.4254	112	20.4254	122	20.4254	126	20.4254	134	20.4254	166	20.4254	166	20.4254	127	20.4254	121	20.4254	117
20.4424	99	20.4424	136	20.4424	123	20.4424	137	20.4424	112	20.4424	109	20.4424	118	20.4424	123	20.4424	130	20.4424	130	20.4424	115	20.4424	121	20.4424	127
20.4594	117	20.4594	87	20.4594	127	20.4594	110	20.4594	119	20.4594	115	20.4594	104	20.4594	148	20.4594	133	20.4594	133	20.4594	152	20.4594	144	20.4594	166
20.4764	103	20.4764	116	20.4764	106	20.4764	116	20.4764	127	20.4764	111	20.4764	121	20.4764	121	20.4764	149	20.4764	149	20.4764	141	20.4764	151	20.4764	157
20.4934	105	20.4934	113	20.4934	102	20.4934	119	20.4934	113	20.4934	118	20.4934	130	20.4934	116	20.4934	144	20.4934	144	20.4934	146	20.4934	135	20.4934	158
20.5104	93	20.5104	112	20.5104	114	20.5104	111	20.5104	114	20.5104	128	20.5104	109	20.5104	133	20.5104	155	20.5104	155	20.5104	148	20.5104	162	20.5104	138
20.5274	119	20.5274	107	20.5274	105	20.5274	128	20.5274	121	20.5274	107	20.5274	152	20.5274	113	20.5274	144	20.5274	144	20.5274	150	20.5274	150	20.5274	164
20.5444	130	20.5444	115	20.5444	122	20.5444	117	20.5444	132	20.5444	134	20.5444	134	20.5444	120	20.5444	148	20.5444	148	20.5444	122	20.5444	139	20.5444	132
20.5614	105	20.5614	110	20.5614	115	20.5614	114	20.5614	125	20.5614	128	20.5614	121	20.5614	112	20.5614	137	20.5614	137	20.5614	155	20.5614	151	20.5614	147
20.5784	123	20.5784	129	20.5784	114	20.5784	104	20.5784	129	20.5784	118	20.5784	139	20.5784	123	20.5784	143	20.5784	143	20.5784	145	20.5784	159	20.5784	142
20.5954	113	20.5954	123	20.5954	116	20.5954	120	20.5954	126	20.5954	104	20.5954	118	20.5954	144	20.5954	117	20.5954	117	20.5954	138	20.5954	150	20.5954	147
20.6124	124	20.6124	118	20.6124	138	20.6124	124	20.6124	124	20.6124	118	20.6124	127	20.6124	131	20.6124	145	20.6124	145	20.6124	141	20.6124	149	20.6124	144
20.6294	115	20.6294	148	20.6294	106	20.6294	115	20.6294	127	20.6294	121	20.6294	129	20.6294	135	20.6294	142	20.6294	142	20.6294	149	20.6294	164	20.6294	159
20.6464	126	20.6464	142	20.6464	121	20.6464	128	20.6464	125	20.6464	120	20.6464	130	20.6464	146	20.6464	126	20.6464	126	20.6464	174	20.6464	150	20.6464	136
20.6634	124	20.6634	129	20.6634	128	20.6634	129	20.6634	121	20.6634	133	20.6634	128	20.6634	138	20.6634	167	20.6634	167	20.6634	161	20.6634	148	20.6634	146
20.6804	137	20.6804	123	20.6804	131	20.6804	113	20.6804	128	20.6804	134	20.6804	133	20.6804	142	20.6804	171	20.6804	171	20.6804	159	20.6804	167	20.6804	150
20.6974	152	20.6974	112	20.6974	123	20.6974	133	20.6974	130	20.6974	151	20.6974	151	20.6974	142	20.6974	171	20.6974	171	20.6974	181	20.6974	171	20.6974	154
20.7144	131	20.7144	136	20.7144	131	20.7144	133	20.7144	126	20.7144	150	20.7144	143	20.7144	162	20.7144	191	20.7144	191	20.7144	175	20.7144	182	20.7144	143
20.7314	135	20.7314	137	20.7314	139	20.7314	143	20.7314	144	20.7314	153	20.7314	136	20.7314	173	20.7314	190	20.7314	190	20.7314	193	20.7314	187	20.7314	157
20.7484	129	20.7484	154	20.7484	157	20.7484	135	20.7484	138	20.7484	160	20.7484	155	20.7484	181	20.7484	175	20.7484	175	20.7484	194	20.7484	179	20.7484	157
20.7654	147	20.7654	152	20.7654	151	20.7654	135	20.7654	140	20.7654	178	20.7654	163	20.7654	189	20.7654	208	20.7654	208	20.7654	210	20.7654	200	20.7654	172
20.7824	159	20.7824	142	20.7824	161	20.7824	139	20.7824	141	20.7824	214	20.7824	178	20.7824	204	20.7824	239	20.7824	239	20.7824	251	20.7824	226	20.7824	193
20.7994	172	20.7994	164	20.7994	155	20.7994	158	20.7994	160	20.7994	210	20.7994	197	20.7994	245	20.7994	247	20.7994	247	20.7994	272	20.7994	237	20.7994	219
20.8164	206	20.8164	202	20.8164	180	20.8164	171	20.8164	181	20.8164	237	20.8164	204	20.8164	279	20.8164	287	20.8164	287	20.8164	304	20.8164	277	20.8164	230
20.8334	240	20.8334	242	20.8334	203	20.8334	191	20.8334	201	20.8334	314	20.8334	234	20.8334	332	20.8334	358	20.8334	358	20.8334	325	20.8334	320	20.8334	249
20.8504	247	20.8504	256	20.8504	226	20.8504	211	20.8504	253	20.8504	357	20.8504	273	20.8504	341	20.8504	449	20.8504	449	20.8504	333	20.8504	352	20.8504	269
20.8674	271	20.8674	258	20.8674	276	20.8674	233	20.8674	306	20.8674	353	20.8674	307	20.8674	328	20.8674	487	20.8674	487	20.8674	323	20.8674	387	20.8674	330
20.8844	270	20.8844	248	20.8844	301	20.8844	237	20.8844	297	20.8844	322	20.8844	284	20.8844	264	20.8844	439	20.8844	439	20.8844	290	20.8844	400	20.8844	357
20.9014	230	20.9014	203	20.9014	271	20.9014	199	20.9014	255	20.9014	266	20.9014	236	20.9014	250	20.9014	388	20.9014	388	20.9014	242	20.9014	321	20.9014	321
20.9184	211	20.9184	189	20.9184	214	20.9184	199	20.9184	225	20.9184	228	20.9184	229	20.9184	214	20.9184	343	20.9184	343	20.9184	200	20.9184	256	20.9184	289
20.9354	192	20.9354	170	20.9354	193	20.9354	179	20.9354	215	20.9354	191	20.9354	207	20.9354	154	20.9354	276	20.9354	276	20.9354	173	20.9354	229	20.9354	241
20.9524	165	20.9524	142	20.9524	187	20.9524	159	20.9524	186	20.9524	163	20.9524	154	20.9524	135	20.9524	208	20.9524	208	20.9524	159	20.9524	209	20.9524	209
20.9694	136	20.9694	122	20.9694	166	20.9694	138	20.9694	147	20.9694	126	20.9694	133	20.9694	137	20.9694	169	20.9694	169	20.9694	155	20.9694	170	20.9694	176
20.9864	137	20.9864	126	20.9864	129	20.9864	125	20.9864	130	20.9864	126	20.9864	134	20.9864	131	20.9864	157	20.9864	157	20.9864	156	20.9864	160	20.9864	141
21.0034	123	21.0034	130	21.0034	116	21.0034	118	21.0034	127	21.0034	140	21.0034	127	21.0034	126	21.0034	151	21.0034	151	21.0034	154	21.0034	147	21.0034	133
21.0204	111	21.0204	134	21.0204	118	21.0204	115	21.0204	112	21.0204	118	21.0204	123	21.0204	124	21.0204	165	21.0204	165	21.0204	144	21.0204	134	21.0204	127
21.0374	134	21.0374	141	21.0374	118	21.0374	113	21.0374	96	21.0374	105	21.0374	123	21.0374	116	21.0374	158	21.0374	158	21.0374	147	21.0374	137	21.0374	121
21.0544	121	21.0544	129	21.0544	119	21.0544	115	21.0544	105	21.0544	116	21.0544	133	21.0544	109	21.0544	140	21.0544	140	21.0544	131	21.0544	136	21.0544	133
21.0714	115	21.0714	119	21.0714	111	21.0714	120	21.0714	106	21.0714	110	21.0714	133	21.0714	110	21.0714	128	21.0714	128	21.0714	122	21.0714	124	21.0714	151
21.0884	106	21.0884	115	21.0884	103	21.0884	128	21.0884	106	21.0884	120	21.0884	121	21.0884	110	21.0884	136	21.0884	136	21.0884	136	21.0884	151	21.0884	133
21.1054	108	21.1054	118	21.1054	108	21.1054	116	21.1054	123	21.1054	113	21.1054	110	21.1054	115	21.1054	130	21.1054	130	21.1054	139	21.1054	144	21.1054	126
21.1224	97	21.1224	118	21.1224	113	21.1224	110	21.1224	116	21.1224	98	21.1224	102	21.1224	128	21.1224	126	21.1224	126	21.1224	129	21.1224	141	21.1224	128
21.1394	105	21.1394	107	21.1394	119	21.1394	111	21.1394	112	21.1394	107	21.1394	128	21.1394	114	21.1394	113	21.1394	113	21.1394	111	21.1394	137	21.1394	126
21.1564	96	21.1564	106	21.1564	127	21.1564	114	21.1564	120	21.1564	104	21.1564	130	21.1564	109	21.1564	117	21.1564	117	21.1564	124	21.1564	124	21.1564	119
21.1734	97	21.1734	102	21.1734	116	21.1734	102	21.1734	122	21.1734	112	21.1734	120	21.1734	107	21.1734	129	21.1734	129	21.1734	127	21.1734	118	21.1734	116
21.1904	85	21.1904	104	21.1904	106	21.1904	122	21.1904	97	21.1904	135	21.1904	102	21.1904	110	21.1904	123	21.1904	123	21.1904	121	21.1904	123	21.1904	115
21.2074	98	21.2074	104	21.2074	123	21.2074	120	21.2074	99	21.2074	107	21.2074	113	21.2074	102	21.2074	129	21.2074	129	21.2074	117	21.2074	119	21.2074	113
21.2244	115	21.2244	106	21.2244	116	21.2244	108	21.2244	99	21.2244	98	21.2244	115	21.2244	101	21.2244	121	21.2244	121	21.2244	129	21.2244	130	21.2244	132
21.2414	114	21.2414	107	21.2414	112	21.2414	108	21.2414	114	21.2414	111	21.2414	120	21.2414	96	21.2414	115	21.2414	115	21.2414	117	21.2414	133	21.2414	148
21.2584	124	21.2584	125	21.2584	126	21.2584	119	21.2584	109	21.2584	106	21.2584	123	21.2584	110	21.2584	108	21.2584	108	21.2584	128	21.2584	122	21.2584	147
21.2754	105	21.2754	121	21.2754	120	21.2754	114	21.2754	111	21.2754	111	21.2754	114	21.2754	110	21.2754	119	21.2754	119	21.2754	113	21.2754	132	21.2754	118
21.2924	119	21.2924	107	21.2924	127	21.2924	116	21.2924	111	21.2924	114	21.2924	104	21.2924	112	21.2924	113	21.2924	113	21.2924	106	21.2924	120	21.2924	129
21.3094	111	21.3094	106	21.3094	107	21.3094	104	21.3094	127	21.3094	111	21.3094	115	21.3094	112	21.3094	110	21.3094	110	21.3094	118	21.3094	124	21.3094	129
21.3264	112	21.3264	94	21.3264	93	21.3264	113	21.3264	124	21.3264	118	21.3264	121	21.3264	107	21.3264	122	21.3264	122	21.3264	132	21.3264	128	21.3264	133
21.3434	102	21.3434	108	21.3434	116	21.3434	119	21.3434	108	21.3434	115	21.3434	114	21.3434	98	21.3434	121	21.3434	121	21.3434	129	21.3434	119	21.3434	128
21.3604	100	21.3604	119	21.3604	111	21.3604	113	21.3604	111	21.3604	109	21.3604	112	21.3604	104	21.3604	147	21.3604	147	21.3604	119	21.3604	118	21.3604	127
21.3774	103	21.3774	110	21.3774	116	21.3774	111	21.3774	110	21.3774	107	21.3774	109	21.3774	134	21.3774	124	21.3774	124	21.3774	128	21.3774	115	21.3774	106
21.3944	91	21.3944	101	21.3944	104	21.3944	110	21.3944	109	21.3944	117	21.3944	113	21.3944	90	21.3944	101	21.3944	101	21.3944	128	21.3944	121	21.3944	122
21.4114	112	21.4114	101	21.4114	111	21.4114	102	21.4114	99	21.4114	109	21.4114	126	21.4114	118	21.4114	135	21.4114	135	21.4114	131	21.4114	129	21.4114	130
21.4284	89	21.4284	109	21.4284	92	21.4284	129	21.4284	119	21.4284	115	21.4284	126	21.4284	132	21.4284	118	21.4284	118	21.4284	113	21.4284	113	21.4284	157
21.4454	111	21.4454	120	21.4454	114	21.4454	87	21.4454	114	21.4454	116	21.4454	102	21.4454	116	21.4454	140	21.4454	140	21.4454	109	21.4454	112	21.4454	116
21.4624	99	21.4624	109	21.4624	106	21.4624	140	21.4624	117	21.4624	91	21.4624	109	21.4624	119	21.4624	119	21.4624	119	21.4624	134	21.4624	126	21.4624	136
21.4794	115	21.4794	107	21.4794	109	21.4794	103	21.4794	115	21.4794	105	21.4794	107	21.4794	113	21.4794	118	21.4794	118	21.4794	121	21.4794	130	21.4794	115
21.4964	99	21.4964	105	21.4964	110	21.4964	97	21.4964	93	21.4964	118	21.4964	128	21.4964	117	21.4964	118	21.4964	118	21.4964	124	21.4964	139	21.4964	147
21.5134	111	21.5134	97	21.5134	110	21.5134	106	21.5134	116	21.5134	104	21.5134	100	21.5134	135	21.5134	120	21.5134	120	21.5134	110	21.5134	119	21.5134	132
21.5304	93	21.5304	101	21.5304	115	21.5304	101	21.5304	107	21.5304	113	21.5304	100	21.5304	118	21.5304	126	21.5304	126	21.5304	123	21.5304	113	21.5304	136
21.5474	116	21.5474	109	21.5474	91	21.5474	106	21.5474	119	21.5474	96	21.5474	106	21.5474	95	21.5474	109	21.5474	109	21.5474	143	21.5474	132	21.5474	137
21.5644	124	21.5644	125	21.5644	102	21.5644	128	21.5644	130	21.5644	109	21.5644	128	21.5644	128	21.5644	132	21.5644	132	21.5644	126	21.5644	122	21.5644	137
21.5814	106	21.5814	125	21.5814	112	21.5814	126	21.5814	111	21.5814	104	21.5814	120	21.5814	125	21.5814	124	21.5814	124	21.5814	124	21.5814	133	21.5814	150
21.5984	119	21.5984	120	21.5984	112	21.5984	125	21.5984	113	21.5984	115	21.5984	138	21.5984	124	21.5984	115	21.5984	115	21.5984	115	21.5984	137	21.5984	145
21.6154	119	21.6154	102	21.6154	136	21.6154	116	21.6154	119	21.6154	109	21.6154	124	21.6154	126	21.6154	140	21.6154	140	21.6154	136	21.6154	138	21.6154	139
21.6324	105	21.6324	97	21.6324	117	21.6324	105	21.6324	120	21.6324	104	21.6324	137	21.6324	116	21.6324	124	21.6324	124	21.6324	115	21.6324	127	21.6324	135
21.6494	107	21.6494	102	21.6494	108	21.6494	109	21.6494	119	21.6494	126	21.6494	108	21.6494	111	21.6494	119	21.6494	119	21.6494	127	21.6494	142	21.6494	141
21.6664	113	21.6664	112	21.6664	111	21.6664	117	21.6664	115	21.6664	117	21.6664	106	21.6664	121	21.6664	136	21.6664	136	21.6664	114	21.6664	136	21.6664	135
21.6834	107	21.6834	116	21.6834	114	21.6834	113	21.6834	109	21.6834	122	21.6834	123	21.6834	103	21.6834	140	21.6834	140	21.6834	135	21.6834	120	21.6834	111
21.7004	115	21.7004	113	21.7004	119	21.7004	108	21.7004	108	21.7004	111	21.7004	109	21.7004	110	21.7004	120	21.7004	120	21.7004	119	21.7004	119	21.7004	130
21.7174	131	21.7174	89	21.7174	105	21.7174	117	21.7174	99	21.7174	106	21.7174	112	21.7174	102	21.7174	103	21.7174	103	21.7174	119	21.7174	122	21.7174	126
21.7344	112	21.7344	105	21.7344	107	21.7344	116	21.7344	113	21.7344	111	21.7344	121	21.7344	112	21.7344	111	21.7344	111	21.7344	130	21.7344	135	21.7344	140
21.7514	110	21.7514	125	21.7514	108	21.7514	116	21.7514	107	21.7514	111	21.7514	106	21.7514	120	21.7514	109	21.7514	109	21.7514	111	21.7514	138	21.7514	136
21.7684	102	21.7684	119	21.7684	125	21.7684	115	21.7684	125	21.7684	118	21.7684	110	21.7684	119	21.7684	120	21.7684	120	21.7684	110	21.7684	137	21.7684	118
21.7854	108	21.7854	97	21.7854	121	21.7854	115	21.7854	108	21.7854	111	21.7854	111	21.7854	111	21.7854	122	21.7854	122	21.7854	134	21.7854	133	21.7854	113
21.8024	108	21.8024	102	21.8024	117	21.8024	101	21.8024	104	21.8024	114	21.8024	120	21.8024	110	21.8024	127	21.8024	127	21.8024	136	21.8024	120	21.8024	126
21.8194	106	21.8194	100	21.8194	108	21.8194	105	21.8194	118	21.8194	120	21.8194	122	21.8194	110	21.8194	130	21.8194	130	21.8194	125	21.8194	132	21.8194	120
21.8364	107	21.8364	102	21.8364	101	21.8364	118	21.8364	97	21.8364	111	21.8364	115	21.8364	110	21.8364	122	21.8364	122	21.8364	119	21.8364	140	21.8364	119
21.8534	106	21.8534	112	21.8534	103	21.8534	125	21.8534	103	21.8534	114	21.8534	112	21.8534	96	21.8534	125	21.8534	125	21.8534	128	21.8534	132	21.8534	112
21.8704	115	21.8704	118	21.8704	106	21.8704	97	21.8704	118	21.8704	116	21.8704	117	21.8704	99	21.8704	125	21.8704	125	21.8704	140	21.8704	126	21.8704	119
21.8874	120	21.8874	113	21.8874	111	21.8874	103	21.8874	104	21.8874	121	21.8874	131	21.8874	112	21.8874	127	21.8874	127	21.8874	143	21.8874	139	21.8874	124
21.9044	105	21.9044	120	21.9044	116	21.9044	129	21.9044	115	21.9044	123	21.9044	133	21.9044	127	21.9044	130	21.9044	130	21.9044	145	21.9044	138	21.9044	123
21.9214	100	21.9214	124	21.9214	116	21.9214	134	21.9214	115	21.9214	118	21.9214	124	21.9214	134	21.9214	131	21.9214	131	21.9214	145	21.9214	139	21.9214	122
21.9384	115	21.9384	119	21.9384	113	21.9384	124	21.9384	113	21.9384	124	21.9384	114	21.9384	131	21.9384	130	21.9384	130	21.9384	151	21.9384	142	21.9384	134
21.9554	124	21.9554	122	21.9554	118	21.9554	121	21.9554	123	21.9554	127	21.9554	111	21.9554	120	21.9554	143	21.9554	143	21.9554	146	21.9554	145	21.9554	147
21.9724	121	21.9724	126	21.9724	124	21.9724	118	21.9724	118	21.9724	131	21.9724	127	21.9724	126	21.9724	148	21.9724	148	21.9724	149	21.9724	149	21.9724	154
21.9894	121	21.9894	144	21.9894	131	21.9894	131	21.9894	127	21.9894	124	21.9894	128	21.9894	129	21.9894	150	21.9894	150	21.9894	152	21.9894	150	21.9894	149
22.0064	122	22.0064	146	22.0064	137	22.0064	145	22.0064	139	22.0064	134	22.0064	131	22.0064	132	22.0064	161	22.0064	161	22.0064	151	22.0064	155	22.0064	142
22.0234	142	22.0234	141	22.0234	134	22.0234	126	22.0234	129	22.0234	151	22.0234	128	22.0234	138	22.0234	161	22.0234	161	22.0234	170	22.0234	152	22.0234	148
22.0404	154	22.0404	142	22.0404	139	22.0404	117	22.0404	141	22.0404	138	22.0404	137	22.0404	146	22.0404	159	22.0404	159	22.0404	156	22.0404	160	22.0404	145
22.0574	145	22.0574	132	22.0574	137	22.0574	125	22.0574	143	22.0574	131	22.0574	145	22.0574	150	22.0574	157	22.0574	157	22.0574	144	22.0574	185	22.0574	155
22.0744	129	22.0744	121	22.0744	135	22.0744	128	22.0744	143	22.0744	120	22.0744	139	22.0744	141	22.0744	155	22.0744	155	22.0744	163	22.0744	182	22.0744	139
22.0914	129	22.0914	123	22.0914	129	22.0914	132	22.0914	144	22.0914	117	22.0914	135	22.0914	129	22.0914	162	22.0914	162	22.0914	160	22.0914	178	22.0914	148
22.1084	126	22.1084	139	22.1084	125	22.1084	149	22.1084	135	22.1084	120	22.1084	123	22.1084	123	22.1084	152	22.1084	152	22.1084	146	22.1084	155	22.1084	147
22.1254	115	22.1254	114	22.1254	124	22.1254	131	22.1254	123	22.1254	110	22.1254	121	22.1254	113	22.1254	134	22.1254	134	22.1254	131	22.1254	140	22.1254	144
22.1424	104	22.1424	98	22.1424	121	22.1424	102	22.1424	115	22.1424	116	22.1424	127	22.1424	103	22.1424	125	22.1424	125	22.1424	137	22.1424	137	22.1424	131
22.1594	110	22.1594	106	22.1594	101	22.1594	110	22.1594	110	22.1594	127	22.1594	123	22.1594	100	22.1594	128	22.1594	128	22.1594	116	22.1594	133	22.1594	144
22.1764	108	22.1764	98	22.1764	107	22.1764	105	22.1764	128	22.1764	115	22.1764	124	22.1764	92	22.1764	131	22.1764	131	22.1764	117	22.1764	125	22.1764	131
22.1934	106	22.1934	108	22.1934	119	22.1934	113	22.1934	116	22.1934	116	22.1934	121	22.1934	112	22.1934	119	22.1934	119	22.1934	122	22.1934	119	22.1934	127
22.2104	107	22.2104	106	22.2104	98	22.2104	118	22.2104	116	22.2104	109	22.2104	107	22.2104	112	22.2104	106	22.2104	106	22.2104	118	22.2104	128	22.2104	138
22.2274	100	22.2274	109	22.2274	106	22.2274	104	22.2274	112	22.2274	104	22.2274	105	22.2274	112	22.2274	118	22.2274	118	22.2274	131	22.2274	145	22.2274	112
22.2444	117	22.2444	121	22.2444	102	22.2444	110	22.2444	118	22.2444	116	22.2444	113	22.2444	118	22.2444	106	22.2444	106	22.2444	118	22.2444	155	22.2444	134
22.2614	109	22.2614	100	22.2614	97	22.2614	127	22.2614	104	22.2614	122	22.2614	120	22.2614	105	22.2614	132	22.2614	132	22.2614	113	22.2614	132	22.2614	129
22.2784	91	22.2784	115	22.2784	103	22.2784	117	22.2784	81	22.2784	127	22.2784	128	22.2784	111	22.2784	130	22.2784	130	22.2784	139	22.2784	138	22.2784	135
22.2954	101	22.2954	108	22.2954	130	22.2954	98	22.2954	88	22.2954	106	22.2954	121	22.2954	108	22.2954	132	22.2954	132	22.2954	127	22.2954	127	22.2954	133
22.3124	110	22.3124	103	22.3124	120	22.3124	116	22.3124	109	22.3124	108	22.3124	114	22.3124	115	22.3124	135	22.3124	135	22.3124	117	22.3124	144	22.3124	132
22.3294	107	22.3294	101	22.3294	113	22.3294	122	22.3294	116	22.3294	116	22.3294	113	22.3294	108	22.3294	126	22.3294	126	22.3294	120	22.3294	143	22.3294	123
22.3464	113	22.3464	117	22.3464	107	22.3464	128	22.3464	125	22.3464	99	22.3464	89	22.3464	114	22.3464	117	22.3464	117	22.3464	142	22.3464	127	22.3464	135
22.3634	106	22.3634	95	22.3634	117	22.3634	118	22.3634	104	22.3634	100	22.3634	116	22.3634	113	22.3634	106	22.3634	106	22.3634	123	22.3634	136	22.3634	140
22.3804	112	22.3804	110	22.3804	119	22.3804	122	22.3804	105	22.3804	101	22.3804	109	22.3804	124	22.3804	133	22.3804	133	22.3804	117	22.3804	132	22.3804	121
22.3974	107	22.3974	105	22.3974	111	22.3974	116	22.3974	103	22.3974	101	22.3974	123	22.3974	116	22.3974	120	22.3974	120	22.3974	136	22.3974	116	22.3974	142
22.4144	109	22.4144	112	22.4144	101	22.4144	109	22.4144	115	22.4144	117	22.4144	127	22.4144	113	22.4144	126	22.4144	126	22.4144	130	22.4144	103	22.4144	156
22.4314	111	22.4314	113	22.4314	110	22.4314	113	22.4314	129	22.4314	122	22.4314	107	22.4314	111	22.4314	143	22.4314	143	22.4314	129	22.4314	122	22.4314	129
22.4484	111	22.4484	98	22.4484	109	22.4484	107	22.4484	105	22.4484	112	22.4484	96	22.4484	104	22.4484	119	22.4484	119	22.4484	118	22.4484	142	22.4484	113
22.4654	121	22.4654	106	22.4654	121	22.4654	106	22.4654	118	22.4654	115	22.4654	100	22.4654	134	22.4654	137	22.4654	137	22.4654	107	22.4654	133	22.4654	142
22.4824	111	22.4824	126	22.4824	122	22.4824	102	22.4824	92	22.4824	113	22.4824	118	22.4824	97	22.4824	127	22.4824	127	22.4824	112	22.4824	144	22.4824	127
22.4994	103	22.4994	115	22.4994	110	22.4994	94	22.4994	103	22.4994	115	22.4994	135	22.4994	95	22.4994	130	22.4994	130	22.4994	119	22.4994	143	22.4994	119
22.5164	107	22.5164	114	22.5164	114	22.5164	114	22.5164	114	22.5164	103	22.5164	99	22.5164	101	22.5164	127	22.5164	127	22.5164	122	22.5164	138	22.5164	121
22.5334	117	22.5334	115	22.5334	107	22.5334	101	22.5334	116	22.5334	104	22.5334	127	22.5334	115	22.5334	126	22.5334	126	22.5334	140	22.5334	137	22.5334	133
22.5504	92	22.5504	110	22.5504	111	22.5504	119	22.5504	112	22.5504	117	22.5504	113	22.5504	109	22.5504	129	22.5504	129	22.5504	131	22.5504	134	22.5504	133
22.5674	98	22.5674	101	22.5674	110	22.5674	97	22.5674	98	22.5674	116	22.5674	109	22.5674	110	22.5674	113	22.5674	113	22.5674	122	22.5674	125	22.5674	124
22.5844	115	22.5844	106	22.5844	116	22.5844	106	22.5844	102	22.5844	116	22.5844	90	22.5844	102	22.5844	127	22.5844	127	22.5844	118	22.5844	116	22.5844	131
22.6014	117	22.6014	118	22.6014	116	22.6014	126	22.6014	107	22.6014	113	22.6014	112	22.6014	97	22.6014	130	22.6014	130	22.6014	120	22.6014	111	22.6014	119
22.6184	113	22.6184	115	22.6184	97	22.6184	113	22.6184	96	22.6184	120	22.6184	104	22.6184	102	22.6184	118	22.6184	118	22.6184	123	22.6184	142	22.6184	118
22.6354	105	22.6354	116	22.6354	122	22.6354	100	22.6354	104	22.6354	126	22.6354	117	22.6354	123	22.6354	117	22.6354	117	22.6354	116	22.6354	122	22.6354	111
22.6524	105	22.6524	121	22.6524	107	22.6524	119	22.6524	105	22.6524	117	22.6524	117	22.6524	101	22.6524	117	22.6524	117	22.6524	120	22.6524	117	22.6524	137
22.6694	104	22.6694	96	22.6694	106	22.6694	119	22.6694	111	22.6694	112	22.6694	117	22.6694	97	22.6694	113	22.6694	113	22.6694	131	22.6694	126	22.6694	135
22.6864	118	22.6864	106	22.6864	101	22.6864	117	22.6864	100	22.6864	115	22.6864	114	22.6864	116	22.6864	132	22.6864	132	22.6864	116	22.6864	117	22.6864	132
22.7034	127	22.7034	118	22.7034	123	22.7034	114	22.7034	100	22.7034	114	22.7034	119	22.7034	100	22.7034	132	22.7034	132	22.7034	123	22.7034	116	22.7034	134
22.7204	115	22.7204	116	22.7204	124	22.7204	110	22.7204	107	22.7204	116	22.7204	118	22.7204	111	22.7204	129	22.7204	129	22.7204	123	22.7204	143	22.7204	144
22.7374	109	22.7374	113	22.7374	102	22.7374	115	22.7374	116	22.7374	125	22.7374	109	22.7374	120	22.7374	121	22.7374	121	22.7374	117	22.7374	137	22.7374	141
22.7544	100	22.7544	112	22.7544	116	22.7544	129	22.7544	123	22.7544	122	22.7544	109	22.7544	115	22.7544	134	22.7544	134	22.7544	132	22.7544	132	22.7544	138
22.7714	103	22.7714	115	22.7714	131	22.7714	124	22.7714	115	22.7714	134	22.7714	134	22.7714	119	22.7714	146	22.7714	146	22.7714	146	22.7714	136	22.7714	125
22.7884	109	22.7884	117	22.7884	120	22.7884	113	22.7884	119	22.7884	113	22.7884	130	22.7884	136	22.7884	126	22.7884	126	22.7884	143	22.7884	132	22.7884	125
22.8054	114	22.8054	127	22.8054	105	22.8054	112	22.8054	121	22.8054	124	22.8054	123	22.8054	134	22.8054	141	22.8054	141	22.8054	140	22.8054	130	22.8054	139
22.8224	122	22.8224	133	22.8224	104	22.8224	107	22.8224	116	22.8224	132	22.8224	126	22.8224	129	22.8224	142	22.8224	142	22.8224	146	22.8224	149	22.8224	149
22.8394	121	22.8394	131	22.8394	114	22.8394	109	22.8394	129	22.8394	137	22.8394	125	22.8394	130	22.8394	136	22.8394	136	22.8394	135	22.8394	149	22.8394	147
22.8564	116	22.8564	119	22.8564	115	22.8564	124	22.8564	126	22.8564	132	22.8564	135	22.8564	131	22.8564	146	22.8564	146	22.8564	134	22.8564	157	22.8564	154
22.8734	133	22.8734	123	22.8734	113	22.8734	140	22.8734	124	22.8734	116	22.8734	140	22.8734	133	22.8734	156	22.8734	156	22.8734	156	22.8734	155	22.8734	182
22.8904	139	22.8904	125	22.8904	122	22.8904	134	22.8904	136	22.8904	123	22.8904	136	22.8904	151	22.8904	152	22.8904	152	22.8904	157	22.8904	136	22.8904	177
22.9074	132	22.9074	134	22.9074	131	22.9074	127	22.9074	142	22.9074	127	22.9074	144	22.9074	160	22.9074	160	22.9074	160	22.9074	148	22.9074	158	22.9074	152
22.9244	130	22.9244	142	22.9244	140	22.9244	127	22.9244	139	22.9244	137	22.9244	159	22.9244	138	22.9244	171	22.9244	171	22.9244	177	22.9244	170	22.9244	160
22.9414	129	22.9414	133	22.9414	144	22.9414	140	22.9414	148	22.9414	133	22.9414	154	22.9414	137	22.9414	169	22.9414	169	22.9414	180	22.9414	171	22.9414	159
22.9584	139	22.9584	135	22.9584	149	22.9584	144	22.9584	155	22.9584	135	22.9584	144	22.9584	146	22.9584	155	22.9584	155	22.9584	161	22.9584	162	22.9584	167
22.9754	142	22.9754	136	22.9754	144	22.9754	133	22.9754	135	22.9754	143	22.9754	148	22.9754	137	22.9754	153	22.9754	153	22.9754	152	22.9754	155	22.9754	176
22.9924	146	22.9924	148	22.9924	135	22.9924	123	22.9924	138	22.9924	133	22.9924	140	22.9924	140	22.9924	159	22.9924	159	22.9924	161	22.9924	176	22.9924	169
23.0094	133	23.0094	142	23.0094	140	23.0094	130	23.0094	143	23.0094	133	23.0094	152	23.0094	137	23.0094	156	23.0094	156	23.0094	173	23.0094	159	23.0094	171
23.0264	133	23.0264	159	23.0264	144	23.0264	131	23.0264	137	23.0264	133	23.0264	163	23.0264	161	23.0264	183	23.0264	183	23.0264	177	23.0264	144	23.0264	169
23.0434	161	23.0434	162	23.0434	137	23.0434	137	23.0434	141	23.0434	137	23.0434	153	23.0434	159	23.0434	191	23.0434	191	23.0434	189	23.0434	164	23.0434	171
23.0604	165	23.0604	163	23.0604	139	23.0604	142	23.0604	153	23.0604	144	23.0604	142	23.0604	148	23.0604	183	23.0604	183	23.0604	206	23.0604	189	23.0604	170
23.0774	158	23.0774	171	23.0774	159	23.0774	149	23.0774	161	23.0774	165	23.0774	143	23.0774	161	23.0774	187	23.0774	187	23.0774	199	23.0774	197	23.0774	170
23.0944	169	23.0944	166	23.0944	168	23.0944	177	23.0944	192	23.0944	174	23.0944	153	23.0944	165	23.0944	185	23.0944	185	23.0944	203	23.0944	194	23.0944	176
23.1114	163	23.1114	157	23.1114	170	23.1114	170	23.1114	194	23.1114	167	23.1114	186	23.1114	186	23.1114	198	23.1114	198	23.1114	195	23.1114	196	23.1114	166
23.1284	174	23.1284	171	23.1284	178	23.1284	161	23.1284	176	23.1284	172	23.1284	166	23.1284	182	23.1284	204	23.1284	204	23.1284	203	23.1284	187	23.1284	183
23.1454	174	23.1454	181	23.1454	166	23.1454	169	23.1454	172	23.1454	174	23.1454	160	23.1454	180	23.1454	180	23.1454	180	23.1454	201	23.1454	209	23.1454	198
23.1624	165	23.1624	187	23.1624	169	23.1624	180	23.1624	167	23.1624	170	23.1624	208	23.1624	168	23.1624	183	23.1624	183	23.1624	202	23.1624	186	23.1624	192
23.1794	152	23.1794	155	23.1794	174	23.1794	169	23.1794	164	23.1794	173	23.1794	191	23.1794	158	23.1794	192	23.1794	192	23.1794	172	23.1794	190	23.1794	181
23.1964	147	23.1964	162	23.1964	184	23.1964	175	23.1964	184	23.1964	161	23.1964	167	23.1964	158	23.1964	177	23.1964	177	23.1964	153	23.1964	180	23.1964	194
23.2134	174	23.2134	164	23.2134	170	23.2134	176	23.2134	179	23.2134	151	23.2134	173	23.2134	176	23.2134	166	23.2134	166	23.2134	165	23.2134	179	23.2134	181
23.2304	165	23.2304	172	23.2304	174	23.2304	172	23.2304	181	23.2304	161	23.2304	163	23.2304	166	23.2304	166	23.2304	166	23.2304	176	23.2304	177	23.2304	184
23.2474	157	23.2474	131	23.2474	172	23.2474	162	23.2474	179	23.2474	168	23.2474	184	23.2474	147	23.2474	170	23.2474	170	23.2474	166	23.2474	168	23.2474	176
23.2644	171	23.2644	143	23.2644	175	23.2644	167	23.2644	165	23.2644	160	23.2644	183	23.2644	169	23.2644	162	23.2644	162	23.2644	187	23.2644	154	23.2644	166
23.2814	174	23.2814	190	23.2814	173	23.2814	172	23.2814	145	23.2814	171	23.2814	165	23.2814	179	23.2814	157	23.2814	157	23.2814	162	23.2814	159	23.2814	174
23.2984	168	23.2984	163	23.2984	150	23.2984	163	23.2984	149	23.2984	168	23.2984	170	23.2984	159	23.2984	165	23.2984	165	23.2984	177	23.2984	174	23.2984	155
23.3154	157	23.3154	193	23.3154	170	23.3154	203	23.3154	176	23.3154	203	23.3154	176	23.3154	162	23.3154	149	23.3154	149	23.3154	158	23.3154	154	23.3154	177
23.3324	178	23.3324	153	23.3324	182	23.3324	210	23.3324	169	23.3324	182	23.3324	153	23.3324	173	23.3324	173	23.3324	173	23.3324	163	23.3324	164	23.3324	183
23.3494	195	23.3494	175	23.3494	187	23.3494	197	23.3494	184	23.3494	188	23.3494	181	23.3494	183	23.3494	149	23.3494	149	23.3494	173	23.3494	202	23.3494	160
23.3664	193	23.3664	188	23.3664	172	23.3664	195	23.3664	185	23.3664	190	23.3664	178	23.3664	165	23.3664	175	23.3664	175	23.3664	172	23.3664	174	23.3664	178
23.3834	193	23.3834	189	23.3834	166	23.3834	199	23.3834	204	23.3834	220	23.3834	210	23.3834	174	23.3834	169	23.3834	169	23.3834	197	23.3834	188	23.3834	137
23.4004	176	23.4004	167	23.4004	223	23.4004	198	23.4004	195	23.4004	194	23.4004	188	23.4004	195	23.4004	156	23.4004	156	23.4004	174	23.4004	187	23.4004	182
23.4174	184	23.4174	204	23.4174	188	23.4174	211	23.4174	192	23.4174	194	23.4174	175	23.4174	175	23.4174	171	23.4174	171	23.4174	190	23.4174	200	23.4174	165
23.4344	180	23.4344	197	23.4344	189	23.4344	187	23.4344	205	23.4344	214	23.4344	193	23.4344	196	23.4344	183	23.4344	183	23.4344	194	23.4344	200	23.4344	157
23.4514	195	23.4514	177	23.4514	176	23.4514	174	23.4514	196	23.4514	184	23.4514	192	23.4514	174	23.4514	185	23.4514	185	23.4514	194	23.4514	207	23.4514	189
23.4684	185	23.4684	183	23.4684	179	23.4684	213	23.4684	186	23.4684	182	23.4684	178	23.4684	180	23.4684	193	23.4684	193	23.4684	196	23.4684	183	23.4684	208
23.4854	189	23.4854	178	23.4854	203	23.4854	183	23.4854	176	23.4854	177	23.4854	177	23.4854	182	23.4854	182	23.4854	182	23.4854	174	23.4854	199	23.4854	192
23.5024	194	23.5024	197	23.5024	188	23.5024	209	23.5024	183	23.5024	181	23.5024	179	23.5024	160	23.5024	196	23.5024	196	23.5024	174	23.5024	200	23.5024	213
23.5194	171	23.5194	178	23.5194	182	23.5194	195	23.5194	199	23.5194	183	23.5194	188	23.5194	187	23.5194	179	23.5194	179	23.5194	165	23.5194	203	23.5194	211
23.5364	199	23.5364	170	23.5364	182	23.5364	186	23.5364	171	23.5364	172	23.5364	196	23.5364	162	23.5364	214	23.5364	214	23.5364	201	23.5364	185	23.5364	207
23.5534	163	23.5534	166	23.5534	173	23.5534	166	23.5534	167	23.5534	197	23.5534	180	23.5534	165	23.5534	248	23.5534	248	23.5534	204	23.5534	205	23.5534	205
23.5704	175	23.5704	195	23.5704	144	23.5704	180	23.5704	173	23.5704	181	23.5704	185	23.5704	158	23.5704	223	23.5704	223	23.5704	169	23.5704	201	23.5704	202
23.5874	186	23.5874	174	23.5874	185	23.5874	178	23.5874	173	23.5874	165	23.5874	189	23.5874	164	23.5874	230	23.5874	230	23.5874	180	23.5874	180	23.5874	196
23.6044	170	23.6044	180	23.6044	183	23.6044	163	23.6044	165	23.6044	167	23.6044	170	23.6044	160	23.6044	227	23.6044	227	23.6044	190	23.6044	182	23.6044	184
23.6214	178	23.6214	167	23.6214	164	23.6214	179	23.6214	171	23.6214	172	23.6214	173	23.6214	159	23.6214	217	23.6214	217	23.6214	179	23.6214	193	23.6214	189
23.6384	156	23.6384	155	23.6384	162	23.6384	161	23.6384	162	23.6384	185	23.6384	162	23.6384	150	23.6384	184	23.6384	184	23.6384	176	23.6384	181	23.6384	183
23.6554	162	23.6554	167	23.6554	178	23.6554	152	23.6554	181	23.6554	162	23.6554	154	23.6554	148	23.6554	175	23.6554	175	23.6554	128	23.6554	174	23.6554	155
23.6724	167	23.6724	167	23.6724	173	23.6724	179	23.6724	177	23.6724	163	23.6724	149	23.6724	144	23.6724	176	23.6724	176	23.6724	137	23.6724	167	23.6724	160
23.6894	150	23.6894	170	23.6894	154	23.6894	163	23.6894	158	23.6894	164	23.6894	161	23.6894	148	23.6894	171	23.6894	171	23.6894	160	23.6894	149	23.6894	159
23.7064	163	23.7064	149	23.7064	152	23.7064	152	23.7064	172	23.7064	165	23.7064	168	23.7064	164	23.7064	176	23.7064	176	23.7064	176	23.7064	157	23.7064	182
23.7234	177	23.7234	144	23.7234	150	23.7234	153	23.7234	156	23.7234	152	23.7234	161	23.7234	177	23.7234	175	23.7234	175	23.7234	167	23.7234	167	23.7234	171
23.7404	156	23.7404	163	23.7404	167	23.7404	159	23.7404	169	23.7404	146	23.7404	163	23.7404	164	23.7404	192	23.7404	192	23.7404	168	23.7404	167	23.7404	172
23.7574	148	23.7574	163	23.7574	164	23.7574	167	23.7574	178	23.7574	178	23.7574	162	23.7574	165	23.7574	189	23.7574	189	23.7574	173	23.7574	167	23.7574	164
23.7744	137	23.7744	167	23.7744	157	23.7744	174	23.7744	176	23.7744	177	23.7744	165	23.7744	176	23.7744	182	23.7744	182	23.7744	170	23.7744	179	23.7744	175
23.7914	143	23.7914	167	23.7914	155	23.7914	171	23.7914	178	23.7914	174	23.7914	175	23.7914	172	23.7914	192	23.7914	192	23.7914	175	23.7914	176	23.7914	183
23.8084	165	23.8084	150	23.8084	152	23.8084	155	23.8084	159	23.8084	179	23.8084	183	23.8084	176	23.8084	194	23.8084	194	23.8084	177	23.8084	188	23.8084	185
23.8254	169	23.8254	153	23.8254	164	23.8254	149	23.8254	162	23.8254	173	23.8254	183	23.8254	176	23.8254	194	23.8254	194	23.8254	191	23.8254	189	23.8254	198
23.8424	166	23.8424	173	23.8424	189	23.8424	164	23.8424	168	23.8424	164	23.8424	174	23.8424	173	23.8424	182	23.8424	182	23.8424	196	23.8424	184	23.8424	187
23.8594	179	23.8594	182	23.8594	194	23.8594	166	23.8594	161	23.8594	161	23.8594	178	23.8594	162	23.8594	175	23.8594	175	23.8594	191	23.8594	186	23.8594	194
23.8764	166	23.8764	163	23.8764	184	23.8764	170	23.8764	164	23.8764	155	23.8764	169	23.8764	172	23.8764	171	23.8764	171	23.8764	194	23.8764	179	23.8764	206
23.8934	167	23.8934	168	23.8934	177	23.8934	174	23.8934	170	23.8934	173	23.8934	177	23.8934	186	23.8934	179	23.8934	179	23.8934	177	23.8934	178	23.8934	197
23.9104	162	23.9104	172	23.9104	169	23.9104	163	23.9104	171	23.9104	174	23.9104	186	23.9104	169	23.9104	191	23.9104	191	23.9104	159	23.9104	174	23.9104	174
23.9274	153	23.9274	155	23.9274	174	23.9274	162	23.9274	181	23.9274	173	23.9274	173	23.9274	158	23.9274	191	23.9274	191	23.9274	157	23.9274	172	23.9274	169
23.9444	166	23.9444	169	23.9444	165	23.9444	169	23.9444	175	23.9444	180	23.9444	170	23.9444	164	23.9444	181	23.9444	181	23.9444	165	23.9444	165	23.9444	186
23.9614	169	23.9614	160	23.9614	171	23.9614	165	23.9614	173	23.9614	180	23.9614	184	23.9614	157	23.9614	181	23.9614	181	23.9614	179	23.9614	172	23.9614	191
23.9784	164	23.9784	157	23.9784	171	23.9784	154	23.9784	170	23.9784	163	23.9784	210	23.9784	158	23.9784	174	23.9784	174	23.9784	171	23.9784	165	23.9784	192
23.9954	157	23.9954	162	23.9954	165	23.9954	167	23.9954	158	23.9954	164	23.9954	236	23.9954	157	23.9954	162	23.9954	162	23.9954	187	23.9954	168	23.9954	193
24.0124	156	24.0124	159	24.0124	163	24.0124	179	24.0124	164	24.0124	175	24.0124	264	24.0124	155	24.0124	165	24.0124	165	24.0124	176	24.0124	189	24.0124	197
24.0294	169	24.0294	163	24.0294	155	24.0294	160	24.0294	161	24.0294	185	24.0294	236	24.0294	164	24.0294	178	24.0294	178	24.0294	173	24.0294	186	24.0294	182
24.0464	160	24.0464	163	24.0464	144	24.0464	156	24.0464	164	24.0464	168	24.0464	201	24.0464	154	24.0464	175	24.0464	175	24.0464	168	24.0464	185	24.0464	179
24.0634	155	24.0634	161	24.0634	134	24.0634	156	24.0634	156	24.0634	146	24.0634	181	24.0634	163	24.0634	166	24.0634	166	24.0634	173	24.0634	180	24.0634	168
24.0804	139	24.0804	153	24.0804	140	24.0804	144	24.0804	141	24.0804	145	24.0804	175	24.0804	147	24.0804	176	24.0804	176	24.0804	180	24.0804	180	24.0804	182
24.0974	137	24.0974	138	24.0974	157	24.0974	150	24.0974	161	24.0974	139	24.0974	157	24.0974	137	24.0974	160	24.0974	160	24.0974	191	24.0974	171	24.0974	185
24.1144	158	24.1144	141	24.1144	149	24.1144	150	24.1144	141	24.1144	139	24.1144	158	24.1144	153	24.1144	144	24.1144	144	24.1144	165	24.1144	163	24.1144	186
24.1314	145	24.1314	145	24.1314	158	24.1314	134	24.1314	130	24.1314	148	24.1314	165	24.1314	149	24.1314	168	24.1314	168	24.1314	146	24.1314	159	24.1314	174
24.1484	155	24.1484	139	24.1484	135	24.1484	146	24.1484	129	24.1484	145	24.1484	142	24.1484	126	24.1484	151	24.1484	151	24.1484	152	24.1484	166	24.1484	170
24.1654	147	24.1654	145	24.1654	135	24.1654	139	24.1654	134	24.1654	137	24.1654	141	24.1654	138	24.1654	153	24.1654	153	24.1654	159	24.1654	161	24.1654	180
24.1824	143	24.1824	133	24.1824	140	24.1824	132	24.1824	148	24.1824	137	24.1824	148	24.1824	126	24.1824	165	24.1824	165	24.1824	145	24.1824	146	24.1824	178
24.1994	133	24.1994	152	24.1994	146	24.1994	148	24.1994	148	24.1994	153	24.1994	151	24.1994	130	24.1994	153	24.1994	153	24.1994	162	24.1994	126	24.1994	179
24.2164	152	24.2164	137	24.2164	131	24.2164	145	24.2164	130	24.2164	135	24.2164	158	24.2164	130	24.2164	157	24.2164	157	24.2164	158	24.2164	129	24.2164	187
24.2334	123	24.2334	154	24.2334	136	24.2334	134	24.2334	133	24.2334	134	24.2334	137	24.2334	148	24.2334	152	24.2334	152	24.2334	170	24.2334	180	24.2334	176
24.2504	134	24.2504	134	24.2504	149	24.2504	126	24.2504	144	24.2504	143	24.2504	141	24.2504	122	24.2504	150	24.2504	150	24.2504	161	24.2504	172	24.2504	194
24.2674	125	24.2674	142	24.2674	151	24.2674	130	24.2674	131	24.2674	136	24.2674	125	24.2674	99	24.2674	163	24.2674	163	24.2674	141	24.2674	149	24.2674	170
24.2844	125	24.2844	134	24.2844	139	24.2844	116	24.2844	131	24.2844	116	24.2844	127	24.2844	143	24.2844	155	24.2844	155	24.2844	148	24.2844	147	24.2844	176
24.3014	137	24.3014	140	24.3014	124	24.3014	103	24.3014	148	24.3014	160	24.3014	163	24.3014	133	24.3014	156	24.3014	156	24.3014	162	24.3014	178	24.3014	168
24.3184	136	24.3184	131	24.3184	142	24.3184	137	24.3184	121	24.3184	148	24.3184	160	24.3184	125	24.3184	147	24.3184	147	24.3184	152	24.3184	182	24.3184	148
24.3354	123	24.3354	145	24.3354	142	24.3354	121	24.3354	158	24.3354	120	24.3354	157	24.3354	134	24.3354	162	24.3354	162	24.3354	168	24.3354	130	24.3354	163
24.3524	126	24.3524	97	24.3524	134	24.3524	141	24.3524	153	24.3524	118	24.3524	134	24.3524	112	24.3524	176	24.3524	176	24.3524	146	24.3524	137	24.3524	157
24.3694	122	24.3694	125	24.3694	132	24.3694	128	24.3694	126	24.3694	122	24.3694	125	24.3694	139	24.3694	149	24.3694	149	24.3694	146	24.3694	142	24.3694	158
24.3864	131	24.3864	132	24.3864	132	24.3864	143	24.3864	118	24.3864	126	24.3864	158	24.3864	110	24.3864	150	24.3864	150	24.3864	135	24.3864	157	24.3864	135
24.4034	105	24.4034	110	24.4034	110	24.4034	117	24.4034	125	24.4034	103	24.4034	129	24.4034	125	24.4034	131	24.4034	131	24.4034	128	24.4034	131	24.4034	158
24.4204	111	24.4204	127	24.4204	121	24.4204	117	24.4204	118	24.4204	120	24.4204	110	24.4204	122	24.4204	123	24.4204	123	24.4204	133	24.4204	125	24.4204	137
24.4374	99	24.4374	127	24.4374	129	24.4374	119	24.4374	106	24.4374	120	24.4374	149	24.4374	112	24.4374	121	24.4374	121	24.4374	159	24.4374	132	24.4374	140
24.4544	114	24.4544	97	24.4544	125	24.4544	113	24.4544	143	24.4544	120	24.4544	119	24.4544	125	24.4544	130	24.4544	130	24.4544	158	24.4544	144	24.4544	123
24.4714	105	24.4714	118	24.4714	117	24.4714	111	24.4714	118	24.4714	119	24.4714	133	24.4714	118	24.4714	147	24.4714	147	24.4714	126	24.4714	136	24.4714	147
24.4884	120	24.4884	121	24.4884	105	24.4884	126	24.4884	141	24.4884	132	24.4884	121	24.4884	102	24.4884	137	24.4884	137	24.4884	120	24.4884	149	24.4884	122
24.5054	116	24.5054	128	24.5054	111	24.5054	128	24.5054	132	24.5054	118	24.5054	121	24.5054	113	24.5054	135	24.5054	135	24.5054	151	24.5054	143	24.5054	152
24.5224	127	24.5224	115	24.5224	116	24.5224	126	24.5224	113	24.5224	93	24.5224	118	24.5224	135	24.5224	126	24.5224	126	24.5224	123	24.5224	127	24.5224	155
24.5394	114	24.5394	126	24.5394	103	24.5394	116	24.5394	112	24.5394	118	24.5394	127	24.5394	118	24.5394	145	24.5394	145	24.5394	117	24.5394	126	24.5394	153
24.5564	113	24.5564	109	24.5564	126	24.5564	116	24.5564	110	24.5564	121	24.5564	119	24.5564	111	24.5564	139	24.5564	139	24.5564	156	24.5564	161	24.5564	150
24.5734	105	24.5734	129	24.5734	116	24.5734	120	24.5734	116	24.5734	116	24.5734	118	24.5734	114	24.5734	132	24.5734	132	24.5734	143	24.5734	133	24.5734	122
24.5904	119	24.5904	127	24.5904	116	24.5904	111	24.5904	118	24.5904	126	24.5904	102	24.5904	117	24.5904	134	24.5904	134	24.5904	148	24.5904	130	24.5904	126
24.6074	118	24.6074	113	24.6074	109	24.6074	121	24.6074	119	24.6074	121	24.6074	123	24.6074	107	24.6074	138	24.6074	138	24.6074	153	24.6074	140	24.6074	127
24.6244	112	24.6244	111	24.6244	106	24.6244	128	24.6244	122	24.6244	111	24.6244	113	24.6244	131	24.6244	135	24.6244	135	24.6244	133	24.6244	146	24.6244	136
24.6414	112	24.6414	117	24.6414	109	24.6414	114	24.6414	130	24.6414	114	24.6414	123	24.6414	126	24.6414	129	24.6414	129	24.6414	138	24.6414	133	24.6414	139
24.6584	117	24.6584	127	24.6584	127	24.6584	119	24.6584	120	24.6584	108	24.6584	122	24.6584	123	24.6584	131	24.6584	131	24.6584	144	24.6584	127	24.6584	140
24.6754	112	24.6754	124	24.6754	118	24.6754	119	24.6754	134	24.6754	128	24.6754	108	24.6754	122	24.6754	130	24.6754	130	24.6754	137	24.6754	138	24.6754	136
24.6924	116	24.6924	118	24.6924	116	24.6924	128	24.6924	119	24.6924	123	24.6924	113	24.6924	131	24.6924	136	24.6924	136	24.6924	130	24.6924	139	24.6924	137
24.7094	112	24.7094	116	24.7094	124	24.7094	120	24.7094	110	24.7094	117	24.7094	118	24.7094	121	24.7094	134	24.7094	134	24.7094	124	24.7094	144	24.7094	145
24.7264	110	24.7264	117	24.7264	128	24.7264	121	24.7264	121	24.7264	125	24.7264	119	24.7264	121	24.7264	132	24.7264	132	24.7264	139	24.7264	141	24.7264	146
24.7434	116	24.7434	113	24.7434	119	24.7434	135	24.7434	121	24.7434	113	24.7434	127	24.7434	128	24.7434	127	24.7434	127	24.7434	145	24.7434	130	24.7434	149
24.7604	122	24.7604	116	24.7604	120	24.7604	116	24.7604	118	24.7604	107	24.7604	130	24.7604	135	24.7604	125	24.7604	125	24.7604	145	24.7604	131	24.7604	132
24.7774	122	24.7774	113	24.7774	112	24.7774	117	24.7774	116	24.7774	120	24.7774	127	24.7774	127	24.7774	133	24.7774	133	24.7774	144	24.7774	132	24.7774	144
24.7944	114	24.7944	127	24.7944	104	24.7944	131	24.7944	133	24.7944	118	24.7944	114	24.7944	121	24.7944	150	24.7944	150	24.7944	147	24.7944	138	24.7944	148
24.8114	118	24.8114	141	24.8114	130	24.8114	135	24.8114	122	24.8114	113	24.8114	118	24.8114	117	24.8114	153	24.8114	153	24.8114	148	24.8114	138	24.8114	140
24.8284	118	24.8284	134	24.8284	140	24.8284	131	24.8284	105	24.8284	122	24.8284	134	24.8284	125	24.8284	139	24.8284	139	24.8284	147	24.8284	131	24.8284	140
24.8454	107	24.8454	125	24.8454	138	24.8454	123	24.8454	122	24.8454	129	24.8454	131	24.8454	115	24.8454	131	24.8454	131	24.8454	146	24.8454	129	24.8454	147
24.8624	114	24.8624	127	24.8624	136	24.8624	132	24.8624	137	24.8624	127	24.8624	128	24.8624	115	24.8624	131	24.8624	131	24.8624	150	24.8624	141	24.8624	149
24.8794	122	24.8794	130	24.8794	128	24.8794	120	24.8794	140	24.8794	116	24.8794	130	24.8794	116	24.8794	140	24.8794	140	24.8794	142	24.8794	151	24.8794	142
24.8964	119	24.8964	128	24.8964	128	24.8964	119	24.8964	135	24.8964	131	24.8964	126	24.8964	129	24.8964	137	24.8964	137	24.8964	132	24.8964	149	24.8964	143
24.9134	131	24.9134	133	24.9134	119	24.9134	132	24.9134	137	24.9134	139	24.9134	127	24.9134	128	24.9134	127	24.9134	127	24.9134	136	24.9134	150	24.9134	141
24.9304	138	24.9304	134	24.9304	110	24.9304	133	24.9304	132	24.9304	128	24.9304	130	24.9304	117	24.9304	130	24.9304	130	24.9304	149	24.9304	156	24.9304	144
24.9474	123	24.9474	136	24.9474	131	24.9474	115	24.9474	125	24.9474	127	24.9474	139	24.9474	113	24.9474	143	24.9474	143	24.9474	148	24.9474	154	24.9474	149
24.9644	123	24.9644	126	24.9644	141	24.9644	108	24.9644	125	24.9644	128	24.9644	142	24.9644	112	24.9644	146	24.9644	146	24.9644	131	24.9644	157	24.9644	148
24.9814	112	24.9814	111	24.9814	130	24.9814	113	24.9814	126	24.9814	125	24.9814	135	24.9814	112	24.9814	137	24.9814	137	24.9814	153	24.9814	161	24.9814	154
24.9984	128	24.9984	115	24.9984	128	24.9984	126	24.9984	131	24.9984	137	24.9984	135	24.9984	125	24.9984	133	24.9984	133	24.9984	164	24.9984	154	24.9984	152
25.0154	126	25.0154	118	25.0154	126	25.0154	123	25.0154	131	25.0154	164	25.0154	142	25.0154	144	25.0154	136	25.0154	136	25.0154	151	25.0154	152	25.0154	149
25.0324	119	25.0324	123	25.0324	121	25.0324	123	25.0324	124	25.0324	170	25.0324	146	25.0324	142	25.0324	154	25.0324	154	25.0324	154	25.0324	156	25.0324	149
25.0494	133	25.0494	127	25.0494	132	25.0494	136	25.0494	118	25.0494	135	25.0494	129	25.0494	127	25.0494	176	25.0494	176	25.0494	151	25.0494	162	25.0494	150
25.0664	140	25.0664	139	25.0664	141	25.0664	122	25.0664	126	25.0664	139	25.0664	143	25.0664	132	25.0664	157	25.0664	157	25.0664	158	25.0664	154	25.0664	156
25.0834	132	25.0834	146	25.0834	153	25.0834	135	25.0834	144	25.0834	143	25.0834	167	25.0834	133	25.0834	156	25.0834	156	25.0834	172	25.0834	163	25.0834	158
25.1004	148	25.1004	144	25.1004	140	25.1004	141	25.1004	154	25.1004	152	25.1004	170	25.1004	141	25.1004	196	25.1004	196	25.1004	190	25.1004	172	25.1004	192
25.1174	163	25.1174	148	25.1174	150	25.1174	161	25.1174	134	25.1174	160	25.1174	156	25.1174	165	25.1174	188	25.1174	188	25.1174	179	25.1174	190	25.1174	173
25.1344	160	25.1344	158	25.1344	145	25.1344	151	25.1344	158	25.1344	166	25.1344	172	25.1344	171	25.1344	186	25.1344	186	25.1344	197	25.1344	202	25.1344	185
25.1514	165	25.1514	162	25.1514	154	25.1514	144	25.1514	148	25.1514	181	25.1514	174	25.1514	178	25.1514	209	25.1514	209	25.1514	217	25.1514	216	25.1514	188
25.1684	167	25.1684	192	25.1684	183	25.1684	156	25.1684	170	25.1684	181	25.1684	225	25.1684	158	25.1684	209	25.1684	209	25.1684	202	25.1684	235	25.1684	184
25.1854	180	25.1854	168	25.1854	185	25.1854	164	25.1854	188	25.1854	202	25.1854	229	25.1854	155	25.1854	207	25.1854	207	25.1854	190	25.1854	220	25.1854	199
25.2024	185	25.2024	164	25.2024	184	25.2024	164	25.2024	209	25.2024	194	25.2024	206	25.2024	163	25.2024	208	25.2024	208	25.2024	200	25.2024	197	25.2024	203
25.2194	173	25.2194	158	25.2194	191	25.2194	180	25.2194	218	25.2194	204	25.2194	211	25.2194	168	25.2194	213	25.2194	213	25.2194	191	25.2194	210	25.2194	224
25.2364	195	25.2364	167	25.2364	225	25.2364	167	25.2364	175	25.2364	173	25.2364	199	25.2364	137	25.2364	204	25.2364	204	25.2364	195	25.2364	197	25.2364	196
25.2534	192	25.2534	162	25.2534	186	25.2534	144	25.2534	194	25.2534	157	25.2534	176	25.2534	140	25.2534	191	25.2534	191	25.2534	178	25.2534	198	25.2534	188
25.2704	161	25.2704	157	25.2704	157	25.2704	155	25.2704	184	25.2704	172	25.2704	180	25.2704	128	25.2704	183	25.2704	183	25.2704	162	25.2704	180	25.2704	192
25.2874	164	25.2874	156	25.2874	154	25.2874	163	25.2874	153	25.2874	159	25.2874	185	25.2874	150	25.2874	187	25.2874	187	25.2874	168	25.2874	201	25.2874	195
25.3044	149	25.3044	149	25.3044	147	25.3044	143	25.3044	123	25.3044	154	25.3044	161	25.3044	148	25.3044	164	25.3044	164	25.3044	174	25.3044	164	25.3044	184
25.3214	151	25.3214	131	25.3214	161	25.3214	144	25.3214	144	25.3214	148	25.3214	160	25.3214	153	25.3214	150	25.3214	150	25.3214	155	25.3214	181	25.3214	183
25.3384	134	25.3384	135	25.3384	148	25.3384	143	25.3384	135	25.3384	144	25.3384	148	25.3384	122	25.3384	144	25.3384	144	25.3384	151	25.3384	189	25.3384	167
25.3554	172	25.3554	140	25.3554	136	25.3554	115	25.3554	163	25.3554	132	25.3554	122	25.3554	130	25.3554	154	25.3554	154	25.3554	193	25.3554	189	25.3554	175
25.3724	134	25.3724	156	25.3724	133	25.3724	150	25.3724	113	25.3724	149	25.3724	142	25.3724	128	25.3724	162	25.3724	162	25.3724	172	25.3724	182	25.3724	172
25.3894	123	25.3894	157	25.3894	136	25.3894	158	25.3894	151	25.3894	159	25.3894	143	25.3894	163	25.3894	160	25.3894	160	25.3894	177	25.3894	171	25.3894	190
25.4064	146	25.4064	161	25.4064	143	25.4064	150	25.4064	145	25.4064	150	25.4064	135	25.4064	159	25.4064	166	25.4064	166	25.4064	176	25.4064	165	25.4064	185
25.4234	131	25.4234	152	25.4234	145	25.4234	136	25.4234	166	25.4234	158	25.4234	150	25.4234	170	25.4234	168	25.4234	168	25.4234	172	25.4234	169	25.4234	172
25.4404	130	25.4404	158	25.4404	159	25.4404	147	25.4404	137	25.4404	153	25.4404	173	25.4404	156	25.4404	170	25.4404	170	25.4404	157	25.4404	168	25.4404	181
25.4574	145	25.4574	164	25.4574	158	25.4574	166	25.4574	145	25.4574	158	25.4574	153	25.4574	142	25.4574	185	25.4574	185	25.4574	194	25.4574	203	25.4574	161
25.4744	130	25.4744	151	25.4744	141	25.4744	166	25.4744	144	25.4744	176	25.4744	148	25.4744	158	25.4744	204	25.4744	204	25.4744	191	25.4744	178	25.4744	178
25.4914	129	25.4914	175	25.4914	145	25.4914	157	25.4914	171	25.4914	180	25.4914	151	25.4914	168	25.4914	180	25.4914	180	25.4914	198	25.4914	182	25.4914	190
25.5084	156	25.5084	177	25.5084	156	25.5084	152	25.5084	153	25.5084	162	25.5084	169	25.5084	168	25.5084	174	25.5084	174	25.5084	218	25.5084	179	25.5084	182
25.5254	140	25.5254	150	25.5254	151	25.5254	152	25.5254	136	25.5254	153	25.5254	147	25.5254	150	25.5254	181	25.5254	181	25.5254	178	25.5254	176	25.5254	175
25.5424	174	25.5424	150	25.5424	144	25.5424	151	25.5424	150	25.5424	154	25.5424	160	25.5424	166	25.5424	184	25.5424	184	25.5424	173	25.5424	207	25.5424	182
25.5594	171	25.5594	140	25.5594	173	25.5594	151	25.5594	174	25.5594	145	25.5594	168	25.5594	153	25.5594	200	25.5594	200	25.5594	168	25.5594	181	25.5594	196
25.5764	146	25.5764	166	25.5764	160	25.5764	147	25.5764	148	25.5764	142	25.5764	151	25.5764	152	25.5764	185	25.5764	185	25.5764	157	25.5764	192	25.5764	182
25.5934	143	25.5934	150	25.5934	140	25.5934	156	25.5934	141	25.5934	145	25.5934	157	25.5934	142	25.5934	162	25.5934	162	25.5934	159	25.5934	187	25.5934	187
25.6104	146	25.6104	159	25.6104	136	25.6104	150	25.6104	144	25.6104	140	25.6104	161	25.6104	139	25.6104	172	25.6104	172	25.6104	154	25.6104	175	25.6104	199
25.6274	159	25.6274	131	25.6274	150	25.6274	145	25.6274	125	25.6274	130	25.6274	171	25.6274	131	25.6274	176	25.6274	176	25.6274	154	25.6274	167	25.6274	166
25.6444	158	25.6444	122	25.6444	150	25.6444	132	25.6444	123	25.6444	124	25.6444	153	25.6444	138	25.6444	149	25.6444	149	25.6444	180	25.6444	181	25.6444	157
25.6614	136	25.6614	130	25.6614	154	25.6614	124	25.6614	133	25.6614	140	25.6614	139	25.6614	122	25.6614	162	25.6614	162	25.6614	167	25.6614	193	25.6614	173
25.6784	135	25.6784	131	25.6784	132	25.6784	139	25.6784	141	25.6784	160	25.6784	152	25.6784	126	25.6784	162	25.6784	162	25.6784	169	25.6784	183	25.6784	167
25.6954	119	25.6954	137	25.6954	126	25.6954	144	25.6954	128	25.6954	132	25.6954	137	25.6954	126	25.6954	153	25.6954	153	25.6954	174	25.6954	148	25.6954	153
25.7124	126	25.7124	135	25.7124	141	25.7124	142	25.7124	129	25.7124	119	25.7124	118	25.7124	129	25.7124	136	25.7124	136	25.7124	152	25.7124	150	25.7124	160
25.7294	132	25.7294	142	25.7294	143	25.7294	142	25.7294	120	25.7294	117	25.7294	123	25.7294	130	25.7294	139	25.7294	139	25.7294	161	25.7294	169	25.7294	163
25.7464	135	25.7464	133	25.7464	129	25.7464	134	25.7464	130	25.7464	150	25.7464	135	25.7464	126	25.7464	164	25.7464	164	25.7464	169	25.7464	168	25.7464	160
25.7634	126	25.7634	123	25.7634	131	25.7634	133	25.7634	132	25.7634	144	25.7634	142	25.7634	142	25.7634	172	25.7634	172	25.7634	157	25.7634	159	25.7634	159
25.7804	122	25.7804	118	25.7804	139	25.7804	142	25.7804	116	25.7804	137	25.7804	146	25.7804	140	25.7804	165	25.7804	165	25.7804	148	25.7804	170	25.7804	161
25.7974	136	25.7974	119	25.7974	144	25.7974	132	25.7974	117	25.7974	137	25.7974	133	25.7974	129	25.7974	157	25.7974	157	25.7974	139	25.7974	167	25.7974	165
25.8144	148	25.8144	127	25.8144	132	25.8144	118	25.8144	126	25.8144	139	25.8144	134	25.8144	136	25.8144	151	25.8144	151	25.8144	151	25.8144	153	25.8144	157
25.8314	140	25.8314	135	25.8314	131	25.8314	119	25.8314	132	25.8314	132	25.8314	138	25.8314	132	25.8314	145	25.8314	145	25.8314	153	25.8314	160	25.8314	159
25.8484	130	25.8484	131	25.8484	136	25.8484	123	25.8484	129	25.8484	129	25.8484	148	25.8484	113	25.8484	153	25.8484	153	25.8484	151	25.8484	166	25.8484	160
25.8654	135	25.8654	124	25.8654	142	25.8654	117	25.8654	129	25.8654	130	25.8654	140	25.8654	114	25.8654	158	25.8654	158	25.8654	161	25.8654	165	25.8654	143
25.8824	145	25.8824	124	25.8824	129	25.8824	136	25.8824	130	25.8824	129	25.8824	126	25.8824	129	25.8824	147	25.8824	147	25.8824	172	25.8824	161	25.8824	154
25.8994	131	25.8994	121	25.8994	125	25.8994	139	25.8994	120	25.8994	118	25.8994	139	25.8994	135	25.8994	164	25.8994	164	25.8994	151	25.8994	158	25.8994	158
25.9164	115	25.9164	125	25.9164	145	25.9164	133	25.9164	128	25.9164	113	25.9164	144	25.9164	123	25.9164	166	25.9164	166	25.9164	147	25.9164	168	25.9164	160
25.9334	126	25.9334	126	25.9334	141	25.9334	128	25.9334	127	25.9334	121	25.9334	144	25.9334	131	25.9334	149	25.9334	149	25.9334	141	25.9334	174	25.9334	174
25.9504	127	25.9504	125	25.9504	120	25.9504	137	25.9504	142	25.9504	141	25.9504	137	25.9504	142	25.9504	150	25.9504	150	25.9504	147	25.9504	169	25.9504	159
25.9674	112	25.9674	137	25.9674	117	25.9674	135	25.9674	150	25.9674	131	25.9674	130	25.9674	131	25.9674	158	25.9674	158	25.9674	154	25.9674	157	25.9674	140
25.9844	120	25.9844	141	25.9844	130	25.9844	123	25.9844	136	25.9844	130	25.9844	122	25.9844	121	25.9844	147	25.9844	147	25.9844	155	25.9844	155	25.9844	154
26.0014	120	26.0014	118	26.0014	126	26.0014	130	26.0014	131	26.0014	148	26.0014	129	26.0014	129	26.0014	135	26.0014	135	26.0014	151	26.0014	158	26.0014	145
26.0184	128	26.0184	119	26.0184	114	26.0184	134	26.0184	123	26.0184	140	26.0184	135	26.0184	149	26.0184	148	26.0184	148	26.0184	146	26.0184	150	26.0184	160
26.0354	132	26.0354	140	26.0354	124	26.0354	130	26.0354	129	26.0354	118	26.0354	139	26.0354	160	26.0354	139	26.0354	139	26.0354	157	26.0354	154	26.0354	145
26.0524	135	26.0524	137	26.0524	119	26.0524	134	26.0524	141	26.0524	117	26.0524	138	26.0524	152	26.0524	165	26.0524	165	26.0524	160	26.0524	154	26.0524	147
26.0694	133	26.0694	144	26.0694	122	26.0694	118	26.0694	133	26.0694	130	26.0694	123	26.0694	140	26.0694	152	26.0694	152	26.0694	171	26.0694	163	26.0694	156
26.0864	133	26.0864	146	26.0864	127	26.0864	144	26.0864	132	26.0864	127	26.0864	146	26.0864	139	26.0864	153	26.0864	153	26.0864	180	26.0864	170	26.0864	167
26.1034	129	26.1034	135	26.1034	137	26.1034	128	26.1034	143	26.1034	124	26.1034	145	26.1034	155	26.1034	163	26.1034	163	26.1034	172	26.1034	157	26.1034	158
26.1204	144	26.1204	128	26.1204	145	26.1204	120	26.1204	140	26.1204	125	26.1204	137	26.1204	140	26.1204	161	26.1204	161	26.1204	160	26.1204	152	26.1204	160
26.1374	143	26.1374	133	26.1374	131	26.1374	144	26.1374	140	26.1374	124	26.1374	140	26.1374	128	26.1374	181	26.1374	181	26.1374	144	26.1374	164	26.1374	163
26.1544	124	26.1544	133	26.1544	124	26.1544	148	26.1544	150	26.1544	118	26.1544	136	26.1544	144	26.1544	181	26.1544	181	26.1544	148	26.1544	163	26.1544	159
26.1714	132	26.1714	144	26.1714	139	26.1714	133	26.1714	145	26.1714	131	26.1714	127	26.1714	138	26.1714	186	26.1714	186	26.1714	177	26.1714	154	26.1714	164
26.1884	130	26.1884	150	26.1884	144	26.1884	145	26.1884	147	26.1884	116	26.1884	143	26.1884	137	26.1884	176	26.1884	176	26.1884	226	26.1884	204	26.1884	168
26.2054	140	26.2054	148	26.2054	136	26.2054	132	26.2054	140	26.2054	132	26.2054	133	26.2054	154	26.2054	172	26.2054	172	26.2054	183	26.2054	179	26.2054	185
26.2224	158	26.2224	133	26.2224	137	26.2224	135	26.2224	122	26.2224	125	26.2224	136	26.2224	171	26.2224	164	26.2224	164	26.2224	179	26.2224	164	26.2224	183
26.2394	155	26.2394	113	26.2394	129	26.2394	141	26.2394	124	26.2394	134	26.2394	141	26.2394	155	26.2394	186	26.2394	186	26.2394	149	26.2394	181	26.2394	188
26.2564	138	26.2564	131	26.2564	140	26.2564	156	26.2564	139	26.2564	137	26.2564	145	26.2564	145	26.2564	173	26.2564	173	26.2564	178	26.2564	177	26.2564	182
26.2734	163	26.2734	130	26.2734	144	26.2734	148	26.2734	156	26.2734	152	26.2734	156	26.2734	138	26.2734	167	26.2734	167	26.2734	163	26.2734	161	26.2734	190
26.2904	165	26.2904	141	26.2904	124	26.2904	145	26.2904	141	26.2904	147	26.2904	146	26.2904	142	26.2904	151	26.2904	151	26.2904	168	26.2904	182	26.2904	172
26.3074	149	26.3074	159	26.3074	142	26.3074	151	26.3074	145	26.3074	148	26.3074	135	26.3074	146	26.3074	148	26.3074	148	26.3074	177	26.3074	178	26.3074	175
26.3244	153	26.3244	148	26.3244	156	26.3244	147	26.3244	156	26.3244	161	26.3244	163	26.3244	157	26.3244	187	26.3244	187	26.3244	191	26.3244	179	26.3244	175
26.3414	148	26.3414	165	26.3414	135	26.3414	158	26.3414	119	26.3414	154	26.3414	162	26.3414	161	26.3414	189	26.3414	189	26.3414	198	26.3414	191	26.3414	189
26.3584	138	26.3584	149	26.3584	129	26.3584	135	26.3584	154	26.3584	150	26.3584	172	26.3584	171	26.3584	198	26.3584	198	26.3584	210	26.3584	204	26.3584	195
26.3754	179	26.3754	196	26.3754	153	26.3754	146	26.3754	153	26.3754	161	26.3754	165	26.3754	180	26.3754	198	26.3754	198	26.3754	221	26.3754	208	26.3754	209
26.3924	144	26.3924	171	26.3924	145	26.3924	152	26.3924	152	26.3924	167	26.3924	204	26.3924	202	26.3924	219	26.3924	219	26.3924	242	26.3924	219	26.3924	199
26.4094	165	26.4094	184	26.4094	174	26.4094	153	26.4094	164	26.4094	181	26.4094	224	26.4094	208	26.4094	205	26.4094	205	26.4094	251	26.4094	219	26.4094	207
26.4264	188	26.4264	212	26.4264	174	26.4264	146	26.4264	209	26.4264	182	26.4264	235	26.4264	228	26.4264	253	26.4264	253	26.4264	244	26.4264	290	26.4264	208
26.4434	203	26.4434	232	26.4434	159	26.4434	170	26.4434	203	26.4434	205	26.4434	209	26.4434	238	26.4434	295	26.4434	295	26.4434	270	26.4434	272	26.4434	234
26.4604	206	26.4604	257	26.4604	186	26.4604	181	26.4604	202	26.4604	202	26.4604	277	26.4604	259	26.4604	298	26.4604	298	26.4604	330	26.4604	335	26.4604	247
26.4774	225	26.4774	248	26.4774	206	26.4774	197	26.4774	207	26.4774	245	26.4774	271	26.4774	306	26.4774	336	26.4774	336	26.4774	395	26.4774	343	26.4774	288
26.4944	263	26.4944	278	26.4944	243	26.4944	229	26.4944	244	26.4944	287	26.4944	312	26.4944	349	26.4944	435	26.4944	435	26.4944	465	26.4944	406	26.4944	271
26.5114	301	26.5114	323	26.5114	279	26.5114	251	26.5114	274	26.5114	318	26.5114	331	26.5114	419	26.5114	489	26.5114	489	26.5114	514	26.5114	456	26.5114	355
26.5284	356	26.5284	383	26.5284	299	26.5284	281	26.5284	293	26.5284	359	26.5284	405	26.5284	498	26.5284	577	26.5284	577	26.5284	569	26.5284	516	26.5284	408
26.5454	419	26.5454	456	26.5454	349	26.5454	284	26.5454	328	26.5454	401	26.5454	493	26.5454	581	26.5454	644	26.5454	644	26.5454	705	26.5454	582	26.5454	481
26.5624	532	26.5624	546	26.5624	413	26.5624	328	26.5624	386	26.5624	489	26.5624	634	26.5624	740	26.5624	785	26.5624	785	26.5624	892	26.5624	753	26.5624	546
26.5794	639	26.5794	664	26.5794	505	26.5794	397	26.5794	517	26.5794	638	26.5794	764	26.5794	976	26.5794	1065	26.5794	1065	26.5794	1102	26.5794	938	26.5794	649
26.5964	779	26.5964	851	26.5964	592	26.5964	498	26.5964	644	26.5964	833	26.5964	924	26.5964	1220	26.5964	1453	26.5964	1453	26.5964	1276	26.5964	1196	26.5964	772
26.6134	976	26.6134	1052	26.6134	733	26.6134	611	26.6134	780	26.6134	1062	26.6134	1138	26.6134	1361	26.6134	1809	26.6134	1809	26.6134	1469	26.6134	1500	26.6134	978
26.6304	1164	26.6304	1232	26.6304	963	26.6304	816	26.6304	918	26.6304	1314	26.6304	1370	26.6304	1324	26.6304	2187	26.6304	2187	26.6304	1512	26.6304	1925	26.6304	1216
26.6474	1223	26.6474	1263	26.6474	1125	26.6474	1007	26.6474	1063	26.6474	1355	26.6474	1477	26.6474	1148	26.6474	2609	26.6474	2609	26.6474	1381	26.6474	2161	26.6474	1434
26.6644	1127	26.6644	1084	26.6644	1115	26.6644	1009	26.6644	1095	26.6644	1141	26.6644	1411	26.6644	949	26.6644	2800	26.6644	2800	26.6644	1116	26.6644	1967	26.6644	1620
26.6814	968	26.6814	891	26.6814	935	26.6814	847	26.6814	919	26.6814	915	26.6814	1132	26.6814	820	26.6814	2336	26.6814	2336	26.6814	933	26.6814	1551	26.6814	1526
26.6984	799	26.6984	775	26.6984	779	26.6984	689	26.6984	752	26.6984	824	26.6984	904	26.6984	719	26.6984	1701	26.6984	1701	26.6984	837	26.6984	1327	26.6984	1199
26.7154	736	26.7154	705	26.7154	712	26.7154	626	26.7154	686	26.7154	694	26.7154	828	26.7154	562	26.7154	1475	26.7154	1475	26.7154	698	26.7154	1172	26.7154	990
26.7324	630	26.7324	549	26.7324	642	26.7324	575	26.7324	626	26.7324	580	26.7324	744	26.7324	437	26.7324	1389	26.7324	1389	26.7324	533	26.7324	987	26.7324	920
26.7494	507	26.7494	419	26.7494	520	26.7494	460	26.7494	503	26.7494	434	26.7494	572	26.7494	333	26.7494	1027	26.7494	1027	26.7494	401	26.7494	723	26.7494	795
26.7664	395	26.7664	344	26.7664	397	26.7664	365	26.7664	393	26.7664	338	26.7664	415	26.7664	300	26.7664	643	26.7664	643	26.7664	343	26.7664	506	26.7664	584
26.7834	330	26.7834	294	26.7834	304	26.7834	285	26.7834	312	26.7834	308	26.7834	370	26.7834	305	26.7834	457	26.7834	457	26.7834	350	26.7834	404	26.7834	440
26.8004	296	26.8004	292	26.8004	265	26.8004	258	26.8004	295	26.8004	308	26.8004	377	26.8004	295	26.8004	417	26.8004	417	26.8004	376	26.8004	377	26.8004	375
26.8174	270	26.8174	291	26.8174	279	26.8174	280	26.8174	305	26.8174	337	26.8174	416	26.8174	316	26.8174	404	26.8174	404	26.8174	391	26.8174	382	26.8174	333
26.8344	286	26.8344	269	26.8344	292	26.8344	276	26.8344	329	26.8344	304	26.8344	404	26.8344	316	26.8344	397	26.8344	397	26.8344	411	26.8344	391	26.8344	324
26.8514	299	26.8514	266	26.8514	301	26.8514	297	26.8514	341	26.8514	318	26.8514	419	26.8514	284	26.8514	388	26.8514	388	26.8514	390	26.8514	385	26.8514	336
26.8684	303	26.8684	282	26.8684	291	26.8684	336	26.8684	357	26.8684	317	26.8684	447	26.8684	264	26.8684	360	26.8684	360	26.8684	346	26.8684	364	26.8684	356
26.8854	280	26.8854	269	26.8854	267	26.8854	318	26.8854	350	26.8854	281	26.8854	411	26.8854	248	26.8854	344	26.8854	344	26.8854	313	26.8854	350	26.8854	352
26.9024	264	26.9024	245	26.9024	247	26.9024	286	26.9024	320	26.9024	260	26.9024	376	26.9024	250	26.9024	320	26.9024	320	26.9024	312	26.9024	332	26.9024	308
26.9194	249	26.9194	226	26.9194	240	26.9194	259	26.9194	294	26.9194	244	26.9194	345	26.9194	220	26.9194	284	26.9194	284	26.9194	316	26.9194	319	26.9194	282
26.9364	230	26.9364	197	26.9364	216	26.9364	243	26.9364	259	26.9364	219	26.9364	306	26.9364	205	26.9364	237	26.9364	237	26.9364	277	26.9364	308	26.9364	266
26.9534	225	26.9534	180	26.9534	206	26.9534	230	26.9534	252	26.9534	205	26.9534	270	26.9534	196	26.9534	229	26.9534	229	26.9534	231	26.9534	266	26.9534	226
26.9704	219	26.9704	161	26.9704	194	26.9704	188	26.9704	230	26.9704	191	26.9704	245	26.9704	179	26.9704	219	26.9704	219	26.9704	203	26.9704	245	26.9704	220
26.9874	227	26.9874	159	26.9874	176	26.9874	164	26.9874	207	26.9874	172	26.9874	209	26.9874	172	26.9874	203	26.9874	203	26.9874	196	26.9874	229	26.9874	215
27.0044	203	27.0044	162	27.0044	181	27.0044	166	27.0044	191	27.0044	162	27.0044	194	27.0044	162	27.0044	193	27.0044	193	27.0044	204	27.0044	200	27.0044	181
27.0214	170	27.0214	158	27.0214	179	27.0214	140	27.0214	173	27.0214	174	27.0214	183	27.0214	157	27.0214	199	27.0214	199	27.0214	194	27.0214	199	27.0214	176
27.0384	182	27.0384	152	27.0384	168	27.0384	151	27.0384	164	27.0384	164	27.0384	174	27.0384	167	27.0384	176	27.0384	176	27.0384	178	27.0384	189	27.0384	188
27.0554	168	27.0554	144	27.0554	154	27.0554	165	27.0554	153	27.0554	163	27.0554	162	27.0554	164	27.0554	180	27.0554	180	27.0554	190	27.0554	213	27.0554	181
27.0724	157	27.0724	154	27.0724	197	27.0724	161	27.0724	169	27.0724	163	27.0724	161	27.0724	156	27.0724	190	27.0724	190	27.0724	180	27.0724	232	27.0724	158
27.0894	170	27.0894	151	27.0894	178	27.0894	151	27.0894	168	27.0894	153	27.0894	165	27.0894	156	27.0894	179	27.0894	179	27.0894	176	27.0894	202	27.0894	170
27.1064	154	27.1064	145	27.1064	151	27.1064	153	27.1064	155	27.1064	155	27.1064	155	27.1064	171	27.1064	177	27.1064	177	27.1064	191	27.1064	182	27.1064	180
27.1234	152	27.1234	142	27.1234	136	27.1234	162	27.1234	161	27.1234	146	27.1234	149	27.1234	170	27.1234	175	27.1234	175	27.1234	182	27.1234	203	27.1234	190
27.1404	143	27.1404	157	27.1404	144	27.1404	155	27.1404	135	27.1404	142	27.1404	163	27.1404	156	27.1404	166	27.1404	166	27.1404	184	27.1404	216	27.1404	182
27.1574	163	27.1574	159	27.1574	159	27.1574	156	27.1574	167	27.1574	131	27.1574	139	27.1574	162	27.1574	175	27.1574	175	27.1574	180	27.1574	184	27.1574	152
27.1744	152	27.1744	146	27.1744	144	27.1744	147	27.1744	143	27.1744	133	27.1744	163	27.1744	161	27.1744	179	27.1744	179	27.1744	163	27.1744	178	27.1744	165
27.1914	149	27.1914	135	27.1914	159	27.1914	139	27.1914	150	27.1914	136	27.1914	177	27.1914	161	27.1914	184	27.1914	184	27.1914	152	27.1914	175	27.1914	179
27.2084	156	27.2084	150	27.2084	134	27.2084	157	27.2084	150	27.2084	146	27.2084	163	27.2084	158	27.2084	165	27.2084	165	27.2084	161	27.2084	159	27.2084	178
27.2254	126	27.2254	157	27.2254	144	27.2254	161	27.2254	143	27.2254	147	27.2254	164	27.2254	160	27.2254	177	27.2254	177	27.2254	167	27.2254	189	27.2254	178
27.2424	155	27.2424	143	27.2424	144	27.2424	161	27.2424	145	27.2424	132	27.2424	150	27.2424	133	27.2424	182	27.2424	182	27.2424	171	27.2424	173	27.2424	181
27.2594	148	27.2594	131	27.2594	156	27.2594	147	27.2594	151	27.2594	160	27.2594	158	27.2594	148	27.2594	184	27.2594	184	27.2594	183	27.2594	188	27.2594	187
27.2764	142	27.2764	147	27.2764	136	27.2764	143	27.2764	134	27.2764	143	27.2764	142	27.2764	157	27.2764	185	27.2764	185	27.2764	158	27.2764	177	27.2764	168
27.2934	158	27.2934	128	27.2934	132	27.2934	148	27.2934	137	27.2934	141	27.2934	176	27.2934	176	27.2934	175	27.2934	175	27.2934	171	27.2934	201	27.2934	175
27.3104	157	27.3104	153	27.3104	140	27.3104	137	27.3104	158	27.3104	137	27.3104	150	27.3104	154	27.3104	168	27.3104	168	27.3104	166	27.3104	185	27.3104	195
27.3274	160	27.3274	133	27.3274	129	27.3274	147	27.3274	157	27.3274	158	27.3274	179	27.3274	143	27.3274	171	27.3274	171	27.3274	199	27.3274	169	27.3274	166
27.3444	165	27.3444	146	27.3444	130	27.3444	142	27.3444	142	27.3444	160	27.3444	145	27.3444	163	27.3444	196	27.3444	196	27.3444	191	27.3444	164	27.3444	191
27.3614	136	27.3614	158	27.3614	140	27.3614	137	27.3614	150	27.3614	146	27.3614	173	27.3614	165	27.3614	171	27.3614	171	27.3614	221	27.3614	196	27.3614	174
27.3784	134	27.3784	142	27.3784	161	27.3784	116	27.3784	137	27.3784	146	27.3784	182	27.3784	157	27.3784	192	27.3784	192	27.3784	178	27.3784	211	27.3784	193
27.3954	134	27.3954	148	27.3954	142	27.3954	142	27.3954	134	27.3954	148	27.3954	190	27.3954	151	27.3954	189	27.3954	189	27.3954	196	27.3954	195	27.3954	188
27.4124	139	27.4124	167	27.4124	160	27.4124	141	27.4124	155	27.4124	163	27.4124	199	27.4124	171	27.4124	187	27.4124	187	27.4124	191	27.4124	237	27.4124	184
27.4294	171	27.4294	163	27.4294	154	27.4294	143	27.4294	177	27.4294	164	27.4294	233	27.4294	196	27.4294	225	27.4294	225	27.4294	193	27.4294	246	27.4294	210
27.4464	158	27.4464	166	27.4464	163	27.4464	161	27.4464	188	27.4464	156	27.4464	243	27.4464	174	27.4464	194	27.4464	194	27.4464	153	27.4464	263	27.4464	224
27.4634	148	27.4634	179	27.4634	170	27.4634	169	27.4634	126	27.4634	183	27.4634	283	27.4634	179	27.4634	224	27.4634	224	27.4634	180	27.4634	250	27.4634	196
27.4804	157	27.4804	162	27.4804	159	27.4804	149	27.4804	139	27.4804	174	27.4804	234	27.4804	197	27.4804	210	27.4804	210	27.4804	167	27.4804	281	27.4804	211
27.4974	159	27.4974	152	27.4974	157	27.4974	144	27.4974	153	27.4974	175	27.4974	272	27.4974	184	27.4974	214	27.4974	214	27.4974	204	27.4974	263	27.4974	195
27.5144	153	27.5144	133	27.5144	144	27.5144	152	27.5144	160	27.5144	164	27.5144	281	27.5144	159	27.5144	206	27.5144	206	27.5144	194	27.5144	245	27.5144	205
27.5314	159	27.5314	175	27.5314	156	27.5314	152	27.5314	161	27.5314	169	27.5314	254	27.5314	164	27.5314	188	27.5314	188	27.5314	173	27.5314	236	27.5314	187
27.5484	163	27.5484	157	27.5484	154	27.5484	154	27.5484	154	27.5484	169	27.5484	231	27.5484	169	27.5484	217	27.5484	217	27.5484	163	27.5484	228	27.5484	188
27.5654	159	27.5654	171	27.5654	151	27.5654	137	27.5654	161	27.5654	165	27.5654	230	27.5654	153	27.5654	208	27.5654	208	27.5654	191	27.5654	223	27.5654	191
27.5824	137	27.5824	167	27.5824	155	27.5824	155	27.5824	156	27.5824	141	27.5824	215	27.5824	137	27.5824	194	27.5824	194	27.5824	186	27.5824	197	27.5824	182
27.5994	160	27.5994	166	27.5994	139	27.5994	144	27.5994	165	27.5994	157	27.5994	197	27.5994	157	27.5994	177	27.5994	177	27.5994	202	27.5994	183	27.5994	190
27.6164	155	27.6164	160	27.6164	140	27.6164	151	27.6164	166	27.6164	143	27.6164	152	27.6164	145	27.6164	186	27.6164	186	27.6164	183	27.6164	169	27.6164	191
27.6334	138	27.6334	164	27.6334	162	27.6334	160	27.6334	160	27.6334	155	27.6334	159	27.6334	162	27.6334	201	27.6334	201	27.6334	205	27.6334	186	27.6334	180
27.6504	163	27.6504	153	27.6504	173	27.6504	147	27.6504	155	27.6504	168	27.6504	162	27.6504	175	27.6504	196	27.6504	196	27.6504	207	27.6504	174	27.6504	178
27.6674	162	27.6674	167	27.6674	156	27.6674	154	27.6674	147	27.6674	159	27.6674	171	27.6674	172	27.6674	214	27.6674	214	27.6674	221	27.6674	198	27.6674	194
27.6844	161	27.6844	169	27.6844	169	27.6844	154	27.6844	139	27.6844	173	27.6844	166	27.6844	175	27.6844	197	27.6844	197	27.6844	222	27.6844	207	27.6844	211
27.7014	161	27.7014	172	27.7014	153	27.7014	147	27.7014	160	27.7014	181	27.7014	197	27.7014	178	27.7014	213	27.7014	213	27.7014	230	27.7014	209	27.7014	216
27.7184	163	27.7184	198	27.7184	143	27.7184	162	27.7184	168	27.7184	180	27.7184	195	27.7184	168	27.7184	254	27.7184	254	27.7184	250	27.7184	219	27.7184	222
27.7354	179	27.7354	199	27.7354	143	27.7354	179	27.7354	178	27.7354	194	27.7354	207	27.7354	187	27.7354	260	27.7354	260	27.7354	248	27.7354	239	27.7354	237
27.7524	199	27.7524	191	27.7524	160	27.7524	175	27.7524	184	27.7524	188	27.7524	208	27.7524	196	27.7524	236	27.7524	236	27.7524	240	27.7524	235	27.7524	252
27.7694	196	27.7694	179	27.7694	178	27.7694	170	27.7694	194	27.7694	200	27.7694	205	27.7694	190	27.7694	244	27.7694	244	27.7694	215	27.7694	209	27.7694	264
27.7864	190	27.7864	170	27.7864	178	27.7864	164	27.7864	198	27.7864	202	27.7864	217	27.7864	186	27.7864	273	27.7864	273	27.7864	232	27.7864	214	27.7864	237
27.8034	194	27.8034	175	27.8034	173	27.8034	180	27.8034	198	27.8034	208	27.8034	222	27.8034	195	27.8034	285	27.8034	285	27.8034	246	27.8034	229	27.8034	245
27.8204	189	27.8204	179	27.8204	166	27.8204	196	27.8204	198	27.8204	233	27.8204	221	27.8204	201	27.8204	258	27.8204	258	27.8204	248	27.8204	256	27.8204	262
27.8374	195	27.8374	185	27.8374	185	27.8374	203	27.8374	203	27.8374	220	27.8374	215	27.8374	207	27.8374	253	27.8374	253	27.8374	245	27.8374	264	27.8374	261
27.8544	196	27.8544	193	27.8544	209	27.8544	209	27.8544	206	27.8544	214	27.8544	214	27.8544	223	27.8544	274	27.8544	274	27.8544	245	27.8544	268	27.8544	270
27.8714	190	27.8714	191	27.8714	204	27.8714	205	27.8714	224	27.8714	224	27.8714	217	27.8714	255	27.8714	325	27.8714	325	27.8714	248	27.8714	252	27.8714	276
27.8884	210	27.8884	205	27.8884	215	27.8884	202	27.8884	235	27.8884	231	27.8884	229	27.8884	277	27.8884	358	27.8884	358	27.8884	263	27.8884	256	27.8884	282
27.9054	240	27.9054	223	27.9054	225	27.9054	218	27.9054	289	27.9054	236	27.9054	239	27.9054	256	27.9054	372	27.9054	372	27.9054	266	27.9054	306	27.9054	320
27.9224	237	27.9224	213	27.9224	263	27.9224	208	27.9224	349	27.9224	255	27.9224	251	27.9224	248	27.9224	373	27.9224	373	27.9224	264	27.9224	334	27.9224	370
27.9394	238	27.9394	216	27.9394	293	27.9394	191	27.9394	291	27.9394	260	27.9394	254	27.9394	245	27.9394	369	27.9394	369	27.9394	265	27.9394	329	27.9394	402
27.9564	221	27.9564	207	27.9564	252	27.9564	199	27.9564	257	27.9564	237	27.9564	284	27.9564	226	27.9564	359	27.9564	359	27.9564	243	27.9564	297	27.9564	390
27.9734	206	27.9734	210	27.9734	215	27.9734	207	27.9734	272	27.9734	220	27.9734	285	27.9734	203	27.9734	354	27.9734	354	27.9734	250	27.9734	286	27.9734	361
27.9904	214	27.9904	200	27.9904	223	27.9904	191	27.9904	252	27.9904	205	27.9904	258	27.9904	197	27.9904	319	27.9904	319	27.9904	247	27.9904	281	27.9904	320
28.0074	192	28.0074	193	28.0074	216	28.0074	181	28.0074	230	28.0074	193	28.0074	234	28.0074	181	28.0074	272	28.0074	272	28.0074	247	28.0074	252	28.0074	315
28.0244	178	28.0244	175	28.0244	205	28.0244	170	28.0244	210	28.0244	174	28.0244	221	28.0244	160	28.0244	243	28.0244	243	28.0244	207	28.0244	236	28.0244	314
28.0414	171	28.0414	165	28.0414	200	28.0414	162	28.0414	212	28.0414	173	28.0414	215	28.0414	163	28.0414	239	28.0414	239	28.0414	205	28.0414	213	28.0414	259
28.0584	160	28.0584	152	28.0584	166	28.0584	160	28.0584	180	28.0584	170	28.0584	172	28.0584	157	28.0584	203	28.0584	203	28.0584	205	28.0584	219	28.0584	230
28.0754	161	28.0754	141	28.0754	157	28.0754	178	28.0754	163	28.0754	167	28.0754	147	28.0754	156	28.0754	202	28.0754	202	28.0754	200	28.0754	213	28.0754	185
28.0924	160	28.0924	166	28.0924	150	28.0924	157	28.0924	141	28.0924	176	28.0924	146	28.0924	150	28.0924	184	28.0924	184	28.0924	172	28.0924	193	28.0924	175
28.1094	139	28.1094	166	28.1094	149	28.1094	151	28.1094	151	28.1094	168	28.1094	142	28.1094	145	28.1094	179	28.1094	179	28.1094	179	28.1094	193	28.1094	188
28.1264	144	28.1264	131	28.1264	145	28.1264	146	28.1264	151	28.1264	143	28.1264	184	28.1264	158	28.1264	192	28.1264	192	28.1264	157	28.1264	180	28.1264	195
28.1434	140	28.1434	143	28.1434	135	28.1434	137	28.1434	145	28.1434	158	28.1434	151	28.1434	141	28.1434	207	28.1434	207	28.1434	153	28.1434	165	28.1434	186
28.1604	171	28.1604	142	28.1604	139	28.1604	146	28.1604	162	28.1604	163	28.1604	146	28.1604	150	28.1604	173	28.1604	173	28.1604	176	28.1604	188	28.1604	166
28.1774	150	28.1774	137	28.1774	141	28.1774	148	28.1774	151	28.1774	151	28.1774	133	28.1774	145	28.1774	184	28.1774	184	28.1774	190	28.1774	194	28.1774	182
28.1944	149	28.1944	145	28.1944	150	28.1944	160	28.1944	128	28.1944	139	28.1944	161	28.1944	128	28.1944	176	28.1944	176	28.1944	174	28.1944	185	28.1944	195
28.2114	149	28.2114	170	28.2114	153	28.2114	152	28.2114	159	28.2114	159	28.2114	158	28.2114	147	28.2114	178	28.2114	178	28.2114	181	28.2114	188	28.2114	169
28.2284	146	28.2284	143	28.2284	172	28.2284	143	28.2284	158	28.2284	139	28.2284	167	28.2284	148	28.2284	209	28.2284	209	28.2284	173	28.2284	195	28.2284	153
28.2454	125	28.2454	146	28.2454	143	28.2454	137	28.2454	154	28.2454	151	28.2454	150	28.2454	155	28.2454	166	28.2454	166	28.2454	193	28.2454	181	28.2454	173
28.2624	129	28.2624	136	28.2624	136	28.2624	152	28.2624	146	28.2624	150	28.2624	151	28.2624	162	28.2624	177	28.2624	177	28.2624	173	28.2624	193	28.2624	168
28.2794	148	28.2794	145	28.2794	146	28.2794	136	28.2794	155	28.2794	159	28.2794	161	28.2794	145	28.2794	179	28.2794	179	28.2794	178	28.2794	183	28.2794	164
28.2964	127	28.2964	144	28.2964	147	28.2964	134	28.2964	159	28.2964	171	28.2964	154	28.2964	144	28.2964	167	28.2964	167	28.2964	159	28.2964	175	28.2964	181
28.3134	129	28.3134	142	28.3134	147	28.3134	142	28.3134	128	28.3134	156	28.3134	178	28.3134	148	28.3134	166	28.3134	166	28.3134	160	28.3134	164	28.3134	174
28.3304	141	28.3304	144	28.3304	148	28.3304	142	28.3304	138	28.3304	140	28.3304	192	28.3304	158	28.3304	154	28.3304	154	28.3304	177	28.3304	204	28.3304	162
28.3474	119	28.3474	152	28.3474	123	28.3474	119	28.3474	155	28.3474	154	28.3474	153	28.3474	137	28.3474	184	28.3474	184	28.3474	173	28.3474	195	28.3474	162
28.3644	137	28.3644	136	28.3644	110	28.3644	133	28.3644	128	28.3644	135	28.3644	136	28.3644	130	28.3644	154	28.3644	154	28.3644	153	28.3644	189	28.3644	175
28.3814	130	28.3814	146	28.3814	122	28.3814	135	28.3814	155	28.3814	131	28.3814	155	28.3814	130	28.3814	154	28.3814	154	28.3814	153	28.3814	172	28.3814	182
28.3984	146	28.3984	145	28.3984	120	28.3984	123	28.3984	140	28.3984	137	28.3984	166	28.3984	135	28.3984	150	28.3984	150	28.3984	136	28.3984	188	28.3984	173
28.4154	131	28.4154	126	28.4154	136	28.4154	134	28.4154	158	28.4154	146	28.4154	160	28.4154	158	28.4154	161	28.4154	161	28.4154	154	28.4154	194	28.4154	162
28.4324	146	28.4324	135	28.4324	146	28.4324	135	28.4324	138	28.4324	134	28.4324	133	28.4324	148	28.4324	157	28.4324	157	28.4324	173	28.4324	195	28.4324	156
28.4494	140	28.4494	141	28.4494	137	28.4494	133	28.4494	137	28.4494	145	28.4494	130	28.4494	149	28.4494	159	28.4494	159	28.4494	174	28.4494	165	28.4494	183
28.4664	130	28.4664	128	28.4664	130	28.4664	148	28.4664	140	28.4664	141	28.4664	138	28.4664	126	28.4664	170	28.4664	170	28.4664	155	28.4664	164	28.4664	170
28.4834	132	28.4834	140	28.4834	118	28.4834	154	28.4834	119	28.4834	142	28.4834	146	28.4834	133	28.4834	185	28.4834	185	28.4834	177	28.4834	181	28.4834	188
28.5004	130	28.5004	151	28.5004	149	28.5004	138	28.5004	147	28.5004	147	28.5004	144	28.5004	156	28.5004	147	28.5004	147	28.5004	168	28.5004	187	28.5004	181
28.5174	114	28.5174	142	28.5174	146	28.5174	132	28.5174	138	28.5174	151	28.5174	157	28.5174	140	28.5174	159	28.5174	159	28.5174	158	28.5174	178	28.5174	166
28.5344	137	28.5344	143	28.5344	137	28.5344	106	28.5344	125	28.5344	152	28.5344	146	28.5344	136	28.5344	190	28.5344	190	28.5344	183	28.5344	170	28.5344	166
28.5514	116	28.5514	134	28.5514	137	28.5514	142	28.5514	143	28.5514	156	28.5514	134	28.5514	139	28.5514	178	28.5514	178	28.5514	177	28.5514	163	28.5514	159
28.5684	144	28.5684	124	28.5684	143	28.5684	149	28.5684	133	28.5684	146	28.5684	147	28.5684	124	28.5684	164	28.5684	164	28.5684	179	28.5684	168	28.5684	171
28.5854	143	28.5854	134	28.5854	142	28.5854	132	28.5854	132	28.5854	142	28.5854	161	28.5854	139	28.5854	173	28.5854	173	28.5854	167	28.5854	161	28.5854	170
28.6024	147	28.6024	145	28.6024	153	28.6024	129	28.6024	123	28.6024	147	28.6024	155	28.6024	148	28.6024	145	28.6024	145	28.6024	167	28.6024	156	28.6024	165
28.6194	145	28.6194	146	28.6194	140	28.6194	127	28.6194	139	28.6194	161	28.6194	143	28.6194	141	28.6194	156	28.6194	156	28.6194	166	28.6194	171	28.6194	155
28.6364	147	28.6364	143	28.6364	127	28.6364	147	28.6364	145	28.6364	172	28.6364	150	28.6364	144	28.6364	173	28.6364	173	28.6364	158	28.6364	159	28.6364	168
28.6534	141	28.6534	136	28.6534	133	28.6534	144	28.6534	134	28.6534	145	28.6534	160	28.6534	152	28.6534	163	28.6534	163	28.6534	152	28.6534	166	28.6534	160
28.6704	130	28.6704	127	28.6704	156	28.6704	148	28.6704	133	28.6704	147	28.6704	142	28.6704	145	28.6704	156	28.6704	156	28.6704	165	28.6704	154	28.6704	150
28.6874	131	28.6874	128	28.6874	134	28.6874	138	28.6874	122	28.6874	121	28.6874	137	28.6874	142	28.6874	158	28.6874	158	28.6874	175	28.6874	158	28.6874	156
28.7044	130	28.7044	141	28.7044	131	28.7044	136	28.7044	136	28.7044	126	28.7044	146	28.7044	144	28.7044	159	28.7044	159	28.7044	158	28.7044	159	28.7044	154
28.7214	146	28.7214	151	28.7214	140	28.7214	136	28.7214	142	28.7214	136	28.7214	132	28.7214	129	28.7214	184	28.7214	184	28.7214	143	28.7214	178	28.7214	159
28.7384	157	28.7384	147	28.7384	134	28.7384	127	28.7384	139	28.7384	136	28.7384	139	28.7384	134	28.7384	174	28.7384	174	28.7384	154	28.7384	173	28.7384	159
28.7554	142	28.7554	144	28.7554	145	28.7554	145	28.7554	137	28.7554	140	28.7554	133	28.7554	145	28.7554	161	28.7554	161	28.7554	162	28.7554	173	28.7554	162
28.7724	137	28.7724	138	28.7724	139	28.7724	159	28.7724	134	28.7724	140	28.7724	137	28.7724	159	28.7724	162	28.7724	162	28.7724	173	28.7724	167	28.7724	160
28.7894	134	28.7894	145	28.7894	146	28.7894	147	28.7894	136	28.7894	142	28.7894	132	28.7894	145	28.7894	156	28.7894	156	28.7894	168	28.7894	157	28.7894	163
28.8064	119	28.8064	155	28.8064	153	28.8064	127	28.8064	129	28.8064	152	28.8064	144	28.8064	139	28.8064	145	28.8064	145	28.8064	147	28.8064	154	28.8064	167
28.8234	119	28.8234	138	28.8234	149	28.8234	136	28.8234	136	28.8234	136	28.8234	155	28.8234	145	28.8234	144	28.8234	144	28.8234	148	28.8234	155	28.8234	161
28.8404	137	28.8404	131	28.8404	147	28.8404	152	28.8404	153	28.8404	133	28.8404	149	28.8404	130	28.8404	170	28.8404	170	28.8404	165	28.8404	169	28.8404	163
28.8574	145	28.8574	129	28.8574	132	28.8574	152	28.8574	136	28.8574	132	28.8574	154	28.8574	136	28.8574	176	28.8574	176	28.8574	165	28.8574	159	28.8574	165
28.8744	137	28.8744	135	28.8744	137	28.8744	141	28.8744	130	28.8744	131	28.8744	154	28.8744	145	28.8744	165	28.8744	165	28.8744	167	28.8744	150	28.8744	166
28.8914	140	28.8914	141	28.8914	143	28.8914	144	28.8914	143	28.8914	150	28.8914	138	28.8914	138	28.8914	155	28.8914	155	28.8914	178	28.8914	160	28.8914	169
28.9084	152	28.9084	139	28.9084	134	28.9084	140	28.9084	154	28.9084	140	28.9084	145	28.9084	150	28.9084	156	28.9084	156	28.9084	164	28.9084	158	28.9084	167
28.9254	157	28.9254	141	28.9254	144	28.9254	124	28.9254	148	28.9254	132	28.9254	138	28.9254	151	28.9254	163	28.9254	163	28.9254	156	28.9254	157	28.9254	177
28.9424	160	28.9424	143	28.9424	150	28.9424	135	28.9424	150	28.9424	151	28.9424	147	28.9424	135	28.9424	152	28.9424	152	28.9424	136	28.9424	164	28.9424	168
28.9594	131	28.9594	139	28.9594	152	28.9594	135	28.9594	141	28.9594	153	28.9594	155	28.9594	136	28.9594	146	28.9594	146	28.9594	142	28.9594	174	28.9594	161
28.9764	130	28.9764	134	28.9764	149	28.9764	133	28.9764	150	28.9764	151	28.9764	156	28.9764	164	28.9764	168	28.9764	168	28.9764	150	28.9764	174	28.9764	174
28.9934	137	28.9934	134	28.9934	142	28.9934	162	28.9934	147	28.9934	152	28.9934	161	28.9934	143	28.9934	167	28.9934	167	28.9934	154	28.9934	177	28.9934	172
29.0104	139	29.0104	152	29.0104	149	29.0104	153	29.0104	148	29.0104	151	29.0104	139	29.0104	136	29.0104	169	29.0104	169	29.0104	155	29.0104	177	29.0104	157
29.0274	130	29.0274	150	29.0274	150	29.0274	160	29.0274	146	29.0274	132	29.0274	144	29.0274	153	29.0274	168	29.0274	168	29.0274	149	29.0274	157	29.0274	186
29.0444	151	29.0444	150	29.0444	147	29.0444	160	29.0444	157	29.0444	148	29.0444	158	29.0444	157	29.0444	171	29.0444	171	29.0444	171	29.0444	145	29.0444	189
29.0614	145	29.0614	161	29.0614	170	29.0614	147	29.0614	171	29.0614	164	29.0614	156	29.0614	164	29.0614	184	29.0614	184	29.0614	166	29.0614	170	29.0614	160
29.0784	134	29.0784	155	29.0784	159	29.0784	174	29.0784	163	29.0784	171	29.0784	158	29.0784	161	29.0784	167	29.0784	167	29.0784	167	29.0784	189	29.0784	162
29.0954	121	29.0954	154	29.0954	149	29.0954	158	29.0954	159	29.0954	168	29.0954	153	29.0954	150	29.0954	169	29.0954	169	29.0954	159	29.0954	173	29.0954	165
29.1124	144	29.1124	168	29.1124	150	29.1124	168	29.1124	147	29.1124	180	29.1124	173	29.1124	163	29.1124	177	29.1124	177	29.1124	202	29.1124	164	29.1124	173
29.1294	150	29.1294	169	29.1294	131	29.1294	149	29.1294	172	29.1294	145	29.1294	161	29.1294	145	29.1294	194	29.1294	194	29.1294	200	29.1294	188	29.1294	177
29.1464	147	29.1464	171	29.1464	143	29.1464	168	29.1464	160	29.1464	164	29.1464	186	29.1464	184	29.1464	192	29.1464	192	29.1464	175	29.1464	156	29.1464	199
29.1634	147	29.1634	162	29.1634	150	29.1634	180	29.1634	162	29.1634	160	29.1634	162	29.1634	195	29.1634	176	29.1634	176	29.1634	195	29.1634	196	29.1634	185
29.1804	170	29.1804	180	29.1804	165	29.1804	163	29.1804	172	29.1804	161	29.1804	165	29.1804	182	29.1804	192	29.1804	192	29.1804	195	29.1804	196	29.1804	169
29.1974	208	29.1974	168	29.1974	148	29.1974	150	29.1974	144	29.1974	196	29.1974	192	29.1974	180	29.1974	169	29.1974	169	29.1974	190	29.1974	209	29.1974	169
29.2144	172	29.2144	192	29.2144	157	29.2144	186	29.2144	170	29.2144	183	29.2144	169	29.2144	178	29.2144	193	29.2144	193	29.2144	212	29.2144	218	29.2144	178
29.2314	192	29.2314	208	29.2314	168	29.2314	192	29.2314	181	29.2314	176	29.2314	194	29.2314	202	29.2314	204	29.2314	204	29.2314	207	29.2314	225	29.2314	195
29.2484	162	29.2484	199	29.2484	193	29.2484	174	29.2484	179	29.2484	228	29.2484	189	29.2484	206	29.2484	227	29.2484	227	29.2484	253	29.2484	194	29.2484	226
29.2654	167	29.2654	202	29.2654	203	29.2654	184	29.2654	182	29.2654	196	29.2654	199	29.2654	236	29.2654	229	29.2654	229	29.2654	260	29.2654	261	29.2654	227
29.2824	206	29.2824	222	29.2824	192	29.2824	196	29.2824	222	29.2824	218	29.2824	239	29.2824	275	29.2824	250	29.2824	250	29.2824	262	29.2824	255	29.2824	245
29.2994	213	29.2994	235	29.2994	234	29.2994	195	29.2994	219	29.2994	221	29.2994	241	29.2994	275	29.2994	284	29.2994	284	29.2994	309	29.2994	277	29.2994	236
29.3164	250	29.3164	290	29.3164	245	29.3164	231	29.3164	219	29.3164	242	29.3164	280	29.3164	308	29.3164	301	29.3164	301	29.3164	383	29.3164	324	29.3164	271
29.3334	296	29.3334	257	29.3334	261	29.3334	236	29.3334	265	29.3334	275	29.3334	328	29.3334	366	29.3334	324	29.3334	324	29.3334	459	29.3334	377	29.3334	327
29.3504	328	29.3504	385	29.3504	284	29.3504	306	29.3504	324	29.3504	365	29.3504	355	29.3504	427	29.3504	376	29.3504	376	29.3504	496	29.3504	418	29.3504	351
29.3674	413	29.3674	444	29.3674	348	29.3674	339	29.3674	356	29.3674	421	29.3674	411	29.3674	507	29.3674	502	29.3674	502	29.3674	560	29.3674	500	29.3674	432
29.3844	436	29.3844	487	29.3844	391	29.3844	366	29.3844	416	29.3844	484	29.3844	493	29.3844	556	29.3844	576	29.3844	576	29.3844	657	29.3844	541	29.3844	495
29.4014	493	29.4014	547	29.4014	484	29.4014	464	29.4014	509	29.4014	546	29.4014	598	29.4014	632	29.4014	701	29.4014	701	29.4014	660	29.4014	629	29.4014	603
29.4184	588	29.4184	647	29.4184	592	29.4184	481	29.4184	582	29.4184	648	29.4184	677	29.4184	694	29.4184	761	29.4184	761	29.4184	699	29.4184	749	29.4184	709
29.4354	626	29.4354	695	29.4354	685	29.4354	523	29.4354	607	29.4354	599	29.4354	737	29.4354	698	29.4354	784	29.4354	784	29.4354	721	29.4354	734	29.4354	754
29.4524	650	29.4524	714	29.4524	630	29.4524	565	29.4524	664	29.4524	657	29.4524	710	29.4524	718	29.4524	801	29.4524	801	29.4524	746	29.4524	811	29.4524	780
29.4694	713	29.4694	736	29.4694	662	29.4694	593	29.4694	719	29.4694	671	29.4694	708	29.4694	696	29.4694	796	29.4694	796	29.4694	729	29.4694	769	29.4694	761
29.4864	688	29.4864	791	29.4864	749	29.4864	590	29.4864	775	29.4864	722	29.4864	731	29.4864	710	29.4864	868	29.4864	868	29.4864	753	29.4864	771	29.4864	803
29.5034	724	29.5034	747	29.5034	726	29.5034	582	29.5034	781	29.5034	687	29.5034	754	29.5034	711	29.5034	863	29.5034	863	29.5034	711	29.5034	808	29.5034	851
29.5204	695	29.5204	724	29.5204	689	29.5204	633	29.5204	781	29.5204	706	29.5204	737	29.5204	710	29.5204	728	29.5204	728	29.5204	705	29.5204	758	29.5204	790
29.5374	700	29.5374	724	29.5374	662	29.5374	632	29.5374	769	29.5374	709	29.5374	687	29.5374	660	29.5374	698	29.5374	698	29.5374	713	29.5374	733	29.5374	777
29.5544	632	29.5544	720	29.5544	657	29.5544	634	29.5544	777	29.5544	638	29.5544	649	29.5544	657	29.5544	708	29.5544	708	29.5544	681	29.5544	689	29.5544	781
29.5714	634	29.5714	694	29.5714	672	29.5714	638	29.5714	727	29.5714	632	29.5714	674	29.5714	723	29.5714	657	29.5714	657	29.5714	654	29.5714	662	29.5714	728
29.5884	628	29.5884	632	29.5884	675	29.5884	660	29.5884	681	29.5884	661	29.5884	699	29.5884	705	29.5884	630	29.5884	630	29.5884	632	29.5884	637	29.5884	722
29.6054	631	29.6054	629	29.6054	656	29.6054	661	29.6054	691	29.6054	618	29.6054	659	29.6054	705	29.6054	604	29.6054	604	29.6054	602	29.6054	617	29.6054	704
29.6224	638	29.6224	617	29.6224	662	29.6224	670	29.6224	683	29.6224	611	29.6224	689	29.6224	673	29.6224	595	29.6224	595	29.6224	559	29.6224	597	29.6224	644
29.6394	665	29.6394	631	29.6394	689	29.6394	666	29.6394	677	29.6394	624	29.6394	700	29.6394	715	29.6394	574	29.6394	574	29.6394	559	29.6394	577	29.6394	626
29.6564	669	29.6564	670	29.6564	665	29.6564	640	29.6564	650	29.6564	603	29.6564	683	29.6564	702	29.6564	533	29.6564	533	29.6564	503	29.6564	570	29.6564	648
29.6734	667	29.6734	632	29.6734	657	29.6734	648	29.6734	661	29.6734	622	29.6734	641	29.6734	698	29.6734	504	29.6734	504	29.6734	489	29.6734	548	29.6734	630
29.6904	699	29.6904	629	29.6904	675	29.6904	662	29.6904	717	29.6904	617	29.6904	648	29.6904	757	29.6904	497	29.6904	497	29.6904	484	29.6904	536	29.6904	583
29.7074	725	29.7074	676	29.7074	666	29.7074	695	29.7074	723	29.7074	639	29.7074	668	29.7074	778	29.7074	491	29.7074	491	29.7074	511	29.7074	530	29.7074	547
29.7244	768	29.7244	721	29.7244	685	29.7244	718	29.7244	715	29.7244	667	29.7244	724	29.7244	753	29.7244	508	29.7244	508	29.7244	540	29.7244	537	29.7244	539
29.7414	766	29.7414	744	29.7414	745	29.7414	738	29.7414	744	29.7414	680	29.7414	728	29.7414	751	29.7414	515	29.7414	515	29.7414	553	29.7414	523	29.7414	560
29.7584	760	29.7584	778	29.7584	752	29.7584	787	29.7584	757	29.7584	710	29.7584	733	29.7584	798	29.7584	500	29.7584	500	29.7584	520	29.7584	509	29.7584	553
29.7754	802	29.7754	769	29.7754	768	29.7754	813	29.7754	780	29.7754	748	29.7754	766	29.7754	811	29.7754	483	29.7754	483	29.7754	546	29.7754	515	29.7754	522
29.7924	806	29.7924	803	29.7924	787	29.7924	813	29.7924	811	29.7924	800	29.7924	776	29.7924	800	29.7924	494	29.7924	494	29.7924	601	29.7924	518	29.7924	551
29.8094	849	29.8094	867	29.8094	818	29.8094	838	29.8094	834	29.8094	823	29.8094	811	29.8094	817	29.8094	502	29.8094	502	29.8094	623	29.8094	510	29.8094	533
29.8264	882	29.8264	916	29.8264	859	29.8264	873	29.8264	857	29.8264	855	29.8264	823	29.8264	837	29.8264	539	29.8264	539	29.8264	656	29.8264	547	29.8264	530
29.8434	891	29.8434	922	29.8434	871	29.8434	876	29.8434	899	29.8434	883	29.8434	820	29.8434	840	29.8434	561	29.8434	561	29.8434	715	29.8434	612	29.8434	566
29.8604	942	29.8604	905	29.8604	893	29.8604	916	29.8604	936	29.8604	862	29.8604	851	29.8604	863	29.8604	583	29.8604	583	29.8604	736	29.8604	676	29.8604	595
29.8774	971	29.8774	932	29.8774	931	29.8774	964	29.8774	945	29.8774	920	29.8774	909	29.8774	864	29.8774	613	29.8774	613	29.8774	748	29.8774	715	29.8774	620
29.8944	974	29.8944	986	29.8944	943	29.8944	997	29.8944	957	29.8944	933	29.8944	935	29.8944	799	29.8944	611	29.8944	611	29.8944	786	29.8944	722	29.8944	615
29.9114	1034	29.9114	1023	29.9114	984	29.9114	1026	29.9114	988	29.9114	909	29.9114	872	29.9114	832	29.9114	623	29.9114	623	29.9114	821	29.9114	732	29.9114	665
29.9284	993	29.9284	983	29.9284	981	29.9284	997	29.9284	1018	29.9284	905	29.9284	862	29.9284	811	29.9284	631	29.9284	631	29.9284	813	29.9284	750	29.9284	681
29.9454	997	29.9454	961	29.9454	985	29.9454	1042	29.9454	966	29.9454	908	29.9454	857	29.9454	807	29.9454	677	29.9454	677	29.9454	807	29.9454	766	29.9454	696
29.9624	969	29.9624	933	29.9624	997	29.9624	1048	29.9624	976	29.9624	954	29.9624	841	29.9624	777	29.9624	723	29.9624	723	29.9624	817	29.9624	777	29.9624	706
29.9794	988	29.9794	918	29.9794	994	29.9794	1014	29.9794	963	29.9794	899	29.9794	793	29.9794	779	29.9794	723	29.9794	723	29.9794	807	29.9794	751	29.9794	702
29.9964	898	29.9964	890	29.9964	942	29.9964	997	29.9964	885	29.9964	886	29.9964	799	29.9964	763	29.9964	707	29.9964	707	29.9964	754	29.9964	718	29.9964	725
30.0134	866	30.0134	879	30.0134	912	30.0134	985	30.0134	900	30.0134	845	30.0134	791	30.0134	722	30.0134	674	30.0134	674	30.0134	758	30.0134	734	30.0134	756
30.0304	883	30.0304	839	30.0304	866	30.0304	906	30.0304	876	30.0304	852	30.0304	770	30.0304	697	30.0304	648	30.0304	648	30.0304	720	30.0304	721	30.0304	747
30.0474	860	30.0474	775	30.0474	835	30.0474	891	30.0474	840	30.0474	813	30.0474	810	30.0474	665	30.0474	659	30.0474	659	30.0474	696	30.0474	753	30.0474	768
30.0644	818	30.0644	710	30.0644	813	30.0644	868	30.0644	821	30.0644	867	30.0644	729	30.0644	645	30.0644	621	30.0644	621	30.0644	698	30.0644	695	30.0644	746
30.0814	771	30.0814	716	30.0814	806	30.0814	865	30.0814	753	30.0814	826	30.0814	724	30.0814	632	30.0814	601	30.0814	601	30.0814	621	30.0814	687	30.0814	707
30.0984	756	30.0984	712	30.0984	781	30.0984	820	30.0984	757	30.0984	785	30.0984	729	30.0984	633	30.0984	626	30.0984	626	30.0984	631	30.0984	671	30.0984	700
30.1154	774	30.1154	707	30.1154	750	30.1154	775	30.1154	768	30.1154	744	30.1154	682	30.1154	581	30.1154	639	30.1154	639	30.1154	607	30.1154	612	30.1154	631
30.1324	684	30.1324	679	30.1324	734	30.1324	742	30.1324	740	30.1324	752	30.1324	654	30.1324	623	30.1324	578	30.1324	578	30.1324	541	30.1324	615	30.1324	628
30.1494	636	30.1494	639	30.1494	694	30.1494	705	30.1494	698	30.1494	734	30.1494	659	30.1494	596	30.1494	548	30.1494	548	30.1494	545	30.1494	621	30.1494	640
30.1664	647	30.1664	579	30.1664	696	30.1664	687	30.1664	717	30.1664	714	30.1664	594	30.1664	558	30.1664	542	30.1664	542	30.1664	518	30.1664	585	30.1664	565
30.1834	608	30.1834	579	30.1834	673	30.1834	665	30.1834	653	30.1834	652	30.1834	610	30.1834	596	30.1834	549	30.1834	549	30.1834	519	30.1834	579	30.1834	581
30.2004	622	30.2004	567	30.2004	677	30.2004	665	30.2004	612	30.2004	678	30.2004	636	30.2004	572	30.2004	536	30.2004	536	30.2004	488	30.2004	542	30.2004	583
30.2174	583	30.2174	588	30.2174	636	30.2174	669	30.2174	648	30.2174	637	30.2174	610	30.2174	587	30.2174	486	30.2174	486	30.2174	477	30.2174	469	30.2174	553
30.2344	558	30.2344	518	30.2344	608	30.2344	625	30.2344	641	30.2344	623	30.2344	592	30.2344	570	30.2344	493	30.2344	493	30.2344	467	30.2344	551	30.2344	517
30.2514	596	30.2514	533	30.2514	587	30.2514	637	30.2514	568	30.2514	584	30.2514	557	30.2514	584	30.2514	486	30.2514	486	30.2514	449	30.2514	483	30.2514	518
30.2684	583	30.2684	518	30.2684	612	30.2684	569	30.2684	571	30.2684	605	30.2684	530	30.2684	511	30.2684	477	30.2684	477	30.2684	448	30.2684	518	30.2684	521
30.2854	500	30.2854	509	30.2854	557	30.2854	570	30.2854	551	30.2854	586	30.2854	580	30.2854	502	30.2854	437	30.2854	437	30.2854	451	30.2854	455	30.2854	461
30.3024	487	30.3024	521	30.3024	597	30.3024	553	30.3024	566	30.3024	601	30.3024	541	30.3024	548	30.3024	489	30.3024	489	30.3024	444	30.3024	425	30.3024	493
30.3194	506	30.3194	505	30.3194	575	30.3194	579	30.3194	563	30.3194	532	30.3194	509	30.3194	543	30.3194	488	30.3194	488	30.3194	383	30.3194	468	30.3194	456
30.3364	494	30.3364	487	30.3364	553	30.3364	542	30.3364	545	30.3364	550	30.3364	523	30.3364	465	30.3364	455	30.3364	455	30.3364	444	30.3364	406	30.3364	477
30.3534	497	30.3534	504	30.3534	543	30.3534	539	30.3534	608	30.3534	539	30.3534	526	30.3534	531	30.3534	459	30.3534	459	30.3534	407	30.3534	430	30.3534	440
30.3704	459	30.3704	521	30.3704	511	30.3704	512	30.3704	590	30.3704	552	30.3704	575	30.3704	527	30.3704	458	30.3704	458	30.3704	403	30.3704	454	30.3704	444
30.3874	535	30.3874	467	30.3874	520	30.3874	552	30.3874	544	30.3874	535	30.3874	541	30.3874	521	30.3874	470	30.3874	470	30.3874	433	30.3874	457	30.3874	437
30.4044	505	30.4044	503	30.4044	521	30.4044	573	30.4044	544	30.4044	517	30.4044	552	30.4044	539	30.4044	470	30.4044	470	30.4044	429	30.4044	465	30.4044	469
30.4214	527	30.4214	499	30.4214	511	30.4214	541	30.4214	528	30.4214	509	30.4214	586	30.4214	559	30.4214	478	30.4214	478	30.4214	425	30.4214	435	30.4214	453
30.4384	514	30.4384	498	30.4384	495	30.4384	526	30.4384	579	30.4384	555	30.4384	529	30.4384	524	30.4384	451	30.4384	451	30.4384	417	30.4384	437	30.4384	442
30.4554	525	30.4554	501	30.4554	508	30.4554	530	30.4554	559	30.4554	550	30.4554	539	30.4554	538	30.4554	467	30.4554	467	30.4554	434	30.4554	433	30.4554	436
30.4724	518	30.4724	502	30.4724	541	30.4724	535	30.4724	539	30.4724	550	30.4724	559	30.4724	561	30.4724	501	30.4724	501	30.4724	450	30.4724	458	30.4724	478
30.4894	549	30.4894	506	30.4894	536	30.4894	560	30.4894	558	30.4894	525	30.4894	571	30.4894	577	30.4894	511	30.4894	511	30.4894	456	30.4894	475	30.4894	469
30.5064	516	30.5064	488	30.5064	531	30.5064	518	30.5064	559	30.5064	539	30.5064	590	30.5064	544	30.5064	493	30.5064	493	30.5064	438	30.5064	510	30.5064	463
30.5234	542	30.5234	502	30.5234	538	30.5234	501	30.5234	576	30.5234	586	30.5234	602	30.5234	552	30.5234	533	30.5234	533	30.5234	453	30.5234	464	30.5234	461
30.5404	529	30.5404	524	30.5404	554	30.5404	586	30.5404	563	30.5404	564	30.5404	582	30.5404	554	30.5404	525	30.5404	525	30.5404	479	30.5404	452	30.5404	470
30.5574	565	30.5574	542	30.5574	575	30.5574	580	30.5574	583	30.5574	555	30.5574	596	30.5574	596	30.5574	551	30.5574	551	30.5574	488	30.5574	446	30.5574	498
30.5744	582	30.5744	558	30.5744	607	30.5744	569	30.5744	573	30.5744	576	30.5744	602	30.5744	565	30.5744	542	30.5744	542	30.5744	471	30.5744	474	30.5744	527
30.5914	553	30.5914	577	30.5914	603	30.5914	567	30.5914	593	30.5914	622	30.5914	613	30.5914	590	30.5914	539	30.5914	539	30.5914	485	30.5914	482	30.5914	518
30.6084	591	30.6084	617	30.6084	552	30.6084	592	30.6084	554	30.6084	626	30.6084	605	30.6084	617	30.6084	554	30.6084	554	30.6084	500	30.6084	458	30.6084	474
30.6254	580	30.6254	616	30.6254	591	30.6254	602	30.6254	596	30.6254	601	30.6254	617	30.6254	614	30.6254	559	30.6254	559	30.6254	506	30.6254	456	30.6254	477
30.6424	622	30.6424	571	30.6424	633	30.6424	598	30.6424	607	30.6424	632	30.6424	635	30.6424	621	30.6424	576	30.6424	576	30.6424	533	30.6424	481	30.6424	502
30.6594	631	30.6594	590	30.6594	646	30.6594	615	30.6594	663	30.6594	660	30.6594	638	30.6594	651	30.6594	599	30.6594	599	30.6594	564	30.6594	494	30.6594	552
30.6764	634	30.6764	639	30.6764	636	30.6764	663	30.6764	704	30.6764	621	30.6764	653	30.6764	652	30.6764	602	30.6764	602	30.6764	594	30.6764	516	30.6764	560
30.6934	673	30.6934	649	30.6934	675	30.6934	684	30.6934	704	30.6934	677	30.6934	652	30.6934	690	30.6934	616	30.6934	616	30.6934	572	30.6934	556	30.6934	567
30.7104	686	30.7104	669	30.7104	687	30.7104	695	30.7104	723	30.7104	742	30.7104	717	30.7104	717	30.7104	658	30.7104	658	30.7104	591	30.7104	609	30.7104	585
30.7274	692	30.7274	712	30.7274	719	30.7274	724	30.7274	745	30.7274	740	30.7274	753	30.7274	735	30.7274	677	30.7274	677	30.7274	623	30.7274	617	30.7274	651
30.7444	715	30.7444	693	30.7444	705	30.7444	728	30.7444	749	30.7444	706	30.7444	766	30.7444	757	30.7444	679	30.7444	679	30.7444	642	30.7444	632	30.7444	643
30.7614	720	30.7614	664	30.7614	700	30.7614	725	30.7614	785	30.7614	710	30.7614	782	30.7614	754	30.7614	673	30.7614	673	30.7614	647	30.7614	661	30.7614	641
30.7784	705	30.7784	726	30.7784	727	30.7784	752	30.7784	780	30.7784	736	30.7784	764	30.7784	736	30.7784	719	30.7784	719	30.7784	657	30.7784	679	30.7784	697
30.7954	727	30.7954	761	30.7954	777	30.7954	786	30.7954	742	30.7954	777	30.7954	769	30.7954	748	30.7954	788	30.7954	788	30.7954	657	30.7954	693	30.7954	701
30.8124	755	30.8124	730	30.8124	803	30.8124	798	30.8124	788	30.8124	775	30.8124	799	30.8124	750	30.8124	777	30.8124	777	30.8124	683	30.8124	685	30.8124	708
30.8294	756	30.8294	744	30.8294	777	30.8294	800	30.8294	851	30.8294	787	30.8294	829	30.8294	746	30.8294	779	30.8294	779	30.8294	710	30.8294	710	30.8294	703
30.8464	755	30.8464	775	30.8464	771	30.8464	806	30.8464	829	30.8464	779	30.8464	860	30.8464	757	30.8464	803	30.8464	803	30.8464	709	30.8464	728	30.8464	730
30.8634	777	30.8634	751	30.8634	763	30.8634	798	30.8634	784	30.8634	732	30.8634	878	30.8634	722	30.8634	822	30.8634	822	30.8634	715	30.8634	719	30.8634	725
30.8804	750	30.8804	718	30.8804	732	30.8804	799	30.8804	777	30.8804	725	30.8804	853	30.8804	688	30.8804	816	30.8804	816	30.8804	702	30.8804	690	30.8804	713
30.8974	715	30.8974	704	30.8974	728	30.8974	765	30.8974	748	30.8974	764	30.8974	890	30.8974	681	30.8974	783	30.8974	783	30.8974	682	30.8974	680	30.8974	707
30.9144	719	30.9144	675	30.9144	693	30.9144	712	30.9144	720	30.9144	737	30.9144	915	30.9144	665	30.9144	789	30.9144	789	30.9144	680	30.9144	686	30.9144	727
30.9314	725	30.9314	658	30.9314	654	30.9314	721	30.9314	705	30.9314	732	30.9314	908	30.9314	634	30.9314	826	30.9314	826	30.9314	674	30.9314	698	30.9314	746
30.9484	673	30.9484	653	30.9484	655	30.9484	694	30.9484	670	30.9484	730	30.9484	886	30.9484	596	30.9484	830	30.9484	830	30.9484	644	30.9484	686	30.9484	714
30.9654	638	30.9654	599	30.9654	603	30.9654	646	30.9654	626	30.9654	686	30.9654	813	30.9654	613	30.9654	777	30.9654	777	30.9654	596	30.9654	658	30.9654	676
30.9824	603	30.9824	535	30.9824	536	30.9824	598	30.9824	632	30.9824	596	30.9824	769	30.9824	559	30.9824	694	30.9824	694	30.9824	533	30.9824	613	30.9824	637
30.9994	505	30.9994	452	30.9994	478	30.9994	544	30.9994	551	30.9994	521	30.9994	723	30.9994	488	30.9994	640	30.9994	640	30.9994	489	30.9994	550	30.9994	601
31.0164	473	31.0164	408	31.0164	455	31.0164	478	31.0164	493	31.0164	462	31.0164	631	31.0164	470	31.0164	581	31.0164	581	31.0164	417	31.0164	533	31.0164	570
31.0334	441	31.0334	382	31.0334	425	31.0334	432	31.0334	423	31.0334	395	31.0334	591	31.0334	433	31.0334	560	31.0334	560	31.0334	372	31.0334	452	31.0334	521
31.0504	400	31.0504	378	31.0504	376	31.0504	428	31.0504	387	31.0504	403	31.0504	501	31.0504	402	31.0504	450	31.0504	450	31.0504	363	31.0504	393	31.0504	442
31.0674	346	31.0674	348	31.0674	373	31.0674	376	31.0674	382	31.0674	372	31.0674	420	31.0674	357	31.0674	428	31.0674	428	31.0674	334	31.0674	356	31.0674	402
31.0844	347	31.0844	288	31.0844	339	31.0844	344	31.0844	329	31.0844	342	31.0844	400	31.0844	323	31.0844	360	31.0844	360	31.0844	284	31.0844	332	31.0844	395
31.1014	284	31.1014	273	31.1014	298	31.1014	288	31.1014	316	31.1014	306	31.1014	348	31.1014	277	31.1014	361	31.1014	361	31.1014	289	31.1014	295	31.1014	352
31.1184	256	31.1184	275	31.1184	247	31.1184	297	31.1184	264	31.1184	274	31.1184	319	31.1184	255	31.1184	300	31.1184	300	31.1184	264	31.1184	308	31.1184	309
31.1354	250	31.1354	233	31.1354	261	31.1354	255	31.1354	263	31.1354	254	31.1354	309	31.1354	263	31.1354	302	31.1354	302	31.1354	247	31.1354	290	31.1354	277
31.1524	269	31.1524	220	31.1524	245	31.1524	280	31.1524	259	31.1524	238	31.1524	277	31.1524	242	31.1524	259	31.1524	259	31.1524	235	31.1524	263	31.1524	256
31.1694	265	31.1694	246	31.1694	269	31.1694	242	31.1694	279	31.1694	240	31.1694	287	31.1694	243	31.1694	266	31.1694	266	31.1694	273	31.1694	273	31.1694	258
31.1864	273	31.1864	229	31.1864	220	31.1864	250	31.1864	248	31.1864	236	31.1864	235	31.1864	218	31.1864	261	31.1864	261	31.1864	243	31.1864	252	31.1864	281
31.2034	246	31.2034	216	31.2034	251	31.2034	252	31.2034	214	31.2034	230	31.2034	281	31.2034	219	31.2034	254	31.2034	254	31.2034	240	31.2034	231	31.2034	239
31.2204	231	31.2204	232	31.2204	236	31.2204	229	31.2204	228	31.2204	211	31.2204	257	31.2204	237	31.2204	245	31.2204	245	31.2204	233	31.2204	254	31.2204	258
31.2374	199	31.2374	216	31.2374	211	31.2374	226	31.2374	240	31.2374	212	31.2374	246	31.2374	196	31.2374	220	31.2374	220	31.2374	260	31.2374	250	31.2374	252
31.2544	242	31.2544	209	31.2544	227	31.2544	223	31.2544	229	31.2544	214	31.2544	220	31.2544	203	31.2544	237	31.2544	237	31.2544	230	31.2544	268	31.2544	270
31.2714	193	31.2714	202	31.2714	223	31.2714	218	31.2714	223	31.2714	211	31.2714	216	31.2714	199	31.2714	262	31.2714	262	31.2714	227	31.2714	236	31.2714	222
31.2884	225	31.2884	192	31.2884	209	31.2884	224	31.2884	212	31.2884	224	31.2884	205	31.2884	203	31.2884	253	31.2884	253	31.2884	218	31.2884	242	31.2884	223
31.3054	189	31.3054	203	31.3054	243	31.3054	213	31.3054	211	31.3054	238	31.3054	219	31.3054	207	31.3054	220	31.3054	220	31.3054	198	31.3054	230	31.3054	245
31.3224	205	31.3224	178	31.3224	209	31.3224	212	31.3224	187	31.3224	195	31.3224	219	31.3224	179	31.3224	210	31.3224	210	31.3224	210	31.3224	205	31.3224	199
31.3394	197	31.3394	176	31.3394	212	31.3394	206	31.3394	192	31.3394	227	31.3394	191	31.3394	171	31.3394	239	31.3394	239	31.3394	210	31.3394	199	31.3394	198
31.3564	200	31.3564	202	31.3564	185	31.3564	191	31.3564	200	31.3564	202	31.3564	188	31.3564	196	31.3564	205	31.3564	205	31.3564	190	31.3564	206	31.3564	190
31.3734	179	31.3734	190	31.3734	188	31.3734	168	31.3734	203	31.3734	167	31.3734	182	31.3734	187	31.3734	198	31.3734	198	31.3734	196	31.3734	205	31.3734	210
31.3904	202	31.3904	175	31.3904	183	31.3904	176	31.3904	197	31.3904	181	31.3904	184	31.3904	156	31.3904	194	31.3904	194	31.3904	189	31.3904	200	31.3904	197
31.4074	193	31.4074	163	31.4074	188	31.4074	151	31.4074	189	31.4074	192	31.4074	182	31.4074	197	31.4074	228	31.4074	228	31.4074	193	31.4074	203	31.4074	177
31.4244	189	31.4244	162	31.4244	170	31.4244	178	31.4244	161	31.4244	187	31.4244	197	31.4244	164	31.4244	218	31.4244	218	31.4244	177	31.4244	198	31.4244	211
31.4414	193	31.4414	181	31.4414	179	31.4414	185	31.4414	166	31.4414	185	31.4414	194	31.4414	173	31.4414	200	31.4414	200	31.4414	195	31.4414	186	31.4414	233
31.4584	194	31.4584	166	31.4584	187	31.4584	179	31.4584	171	31.4584	201	31.4584	197	31.4584	172	31.4584	178	31.4584	178	31.4584	183	31.4584	198	31.4584	192
31.4754	196	31.4754	166	31.4754	168	31.4754	166	31.4754	180	31.4754	190	31.4754	166	31.4754	173	31.4754	177	31.4754	177	31.4754	194	31.4754	209	31.4754	181
31.4924	184	31.4924	177	31.4924	189	31.4924	181	31.4924	162	31.4924	177	31.4924	183	31.4924	190	31.4924	189	31.4924	189	31.4924	196	31.4924	204	31.4924	193
31.5094	186	31.5094	172	31.5094	164	31.5094	180	31.5094	171	31.5094	168	31.5094	189	31.5094	167	31.5094	191	31.5094	191	31.5094	197	31.5094	203	31.5094	205
31.5264	189	31.5264	156	31.5264	166	31.5264	169	31.5264	184	31.5264	192	31.5264	174	31.5264	158	31.5264	190	31.5264	190	31.5264	203	31.5264	218	31.5264	186
31.5434	176	31.5434	172	31.5434	173	31.5434	172	31.5434	169	31.5434	173	31.5434	176	31.5434	177	31.5434	189	31.5434	189	31.5434	195	31.5434	200	31.5434	179
31.5604	178	31.5604	174	31.5604	160	31.5604	195	31.5604	178	31.5604	171	31.5604	185	31.5604	174	31.5604	195	31.5604	195	31.5604	194	31.5604	195	31.5604	194
31.5774	171	31.5774	164	31.5774	163	31.5774	167	31.5774	185	31.5774	163	31.5774	170	31.5774	171	31.5774	201	31.5774	201	31.5774	196	31.5774	204	31.5774	188
31.5944	180	31.5944	169	31.5944	175	31.5944	162	31.5944	188	31.5944	160	31.5944	173	31.5944	178	31.5944	196	31.5944	196	31.5944	195	31.5944	193	31.5944	177
31.6114	169	31.6114	162	31.6114	165	31.6114	160	31.6114	181	31.6114	163	31.6114	188	31.6114	163	31.6114	205	31.6114	205	31.6114	204	31.6114	189	31.6114	182
31.6284	181	31.6284	174	31.6284	161	31.6284	184	31.6284	170	31.6284	171	31.6284	180	31.6284	162	31.6284	200	31.6284	200	31.6284	187	31.6284	184	31.6284	186
31.6454	203	31.6454	182	31.6454	174	31.6454	202	31.6454	158	31.6454	180	31.6454	180	31.6454	151	31.6454	185	31.6454	185	31.6454	173	31.6454	193	31.6454	195
31.6624	177	31.6624	150	31.6624	167	31.6624	186	31.6624	170	31.6624	181	31.6624	193	31.6624	154	31.6624	179	31.6624	179	31.6624	168	31.6624	181	31.6624	191
31.6794	167	31.6794	144	31.6794	168	31.6794	163	31.6794	162	31.6794	180	31.6794	193	31.6794	158	31.6794	185	31.6794	185	31.6794	177	31.6794	162	31.6794	186
31.6964	156	31.6964	153	31.6964	177	31.6964	159	31.6964	170	31.6964	184	31.6964	184	31.6964	165	31.6964	180	31.6964	180	31.6964	174	31.6964	165	31.6964	183
31.7134	146	31.7134	160	31.7134	176	31.7134	155	31.7134	174	31.7134	187	31.7134	180	31.7134	160	31.7134	173	31.7134	173	31.7134	148	31.7134	178	31.7134	188
31.7304	156	31.7304	174	31.7304	173	31.7304	145	31.7304	156	31.7304	182	31.7304	171	31.7304	151	31.7304	181	31.7304	181	31.7304	144	31.7304	182	31.7304	186
31.7474	167	31.7474	170	31.7474	159	31.7474	152	31.7474	155	31.7474	183	31.7474	160	31.7474	163	31.7474	174	31.7474	174	31.7474	164	31.7474	161	31.7474	175
31.7644	165	31.7644	159	31.7644	149	31.7644	166	31.7644	166	31.7644	161	31.7644	160	31.7644	166	31.7644	158	31.7644	158	31.7644	175	31.7644	168	31.7644	178
31.7814	166	31.7814	160	31.7814	160	31.7814	167	31.7814	145	31.7814	145	31.7814	151	31.7814	155	31.7814	170	31.7814	170	31.7814	178	31.7814	186	31.7814	169
31.7984	159	31.7984	165	31.7984	173	31.7984	151	31.7984	148	31.7984	158	31.7984	151	31.7984	152	31.7984	181	31.7984	181	31.7984	174	31.7984	171	31.7984	157
31.8154	157	31.8154	174	31.8154	157	31.8154	157	31.8154	155	31.8154	174	31.8154	165	31.8154	163	31.8154	167	31.8154	167	31.8154	172	31.8154	173	31.8154	163
31.8324	160	31.8324	169	31.8324	171	31.8324	170	31.8324	163	31.8324	168	31.8324	165	31.8324	158	31.8324	170	31.8324	170	31.8324	165	31.8324	181	31.8324	163
31.8494	157	31.8494	151	31.8494	175	31.8494	165	31.8494	157	31.8494	160	31.8494	178	31.8494	161	31.8494	167	31.8494	167	31.8494	165	31.8494	177	31.8494	159
31.8664	155	31.8664	147	31.8664	156	31.8664	178	31.8664	153	31.8664	156	31.8664	175	31.8664	155	31.8664	168	31.8664	168	31.8664	162	31.8664	194	31.8664	187
31.8834	167	31.8834	180	31.8834	167	31.8834	166	31.8834	159	31.8834	173	31.8834	183	31.8834	156	31.8834	189	31.8834	189	31.8834	154	31.8834	187	31.8834	181
31.9004	159	31.9004	182	31.9004	162	31.9004	157	31.9004	150	31.9004	175	31.9004	183	31.9004	158	31.9004	183	31.9004	183	31.9004	158	31.9004	165	31.9004	177
31.9174	165	31.9174	165	31.9174	151	31.9174	150	31.9174	156	31.9174	167	31.9174	167	31.9174	161	31.9174	162	31.9174	162	31.9174	171	31.9174	173	31.9174	186
31.9344	175	31.9344	160	31.9344	156	31.9344	160	31.9344	172	31.9344	157	31.9344	155	31.9344	165	31.9344	161	31.9344	161	31.9344	192	31.9344	188	31.9344	181
31.9514	177	31.9514	166	31.9514	153	31.9514	167	31.9514	172	31.9514	162	31.9514	181	31.9514	154	31.9514	185	31.9514	185	31.9514	185	31.9514	190	31.9514	187
31.9684	159	31.9684	175	31.9684	144	31.9684	163	31.9684	155	31.9684	162	31.9684	187	31.9684	154	31.9684	195	31.9684	195	31.9684	171	31.9684	190	31.9684	174
31.9854	166	31.9854	158	31.9854	164	31.9854	166	31.9854	163	31.9854	180	31.9854	186	31.9854	168	31.9854	169	31.9854	169	31.9854	189	31.9854	189	31.9854	179
32.0024	186	32.0024	156	32.0024	165	32.0024	180	32.0024	172	32.0024	168	32.0024	200	32.0024	181	32.0024	189	32.0024	189	32.0024	186	32.0024	194	32.0024	173
32.0194	177	32.0194	175	32.0194	170	32.0194	177	32.0194	174	32.0194	178	32.0194	176	32.0194	174	32.0194	193	32.0194	193	32.0194	199	32.0194	203	32.0194	167
32.0364	174	32.0364	174	32.0364	182	32.0364	158	32.0364	180	32.0364	183	32.0364	173	32.0364	167	32.0364	188	32.0364	188	32.0364	175	32.0364	193	32.0364	197
32.0534	157	32.0534	174	32.0534	190	32.0534	169	32.0534	162	32.0534	184	32.0534	181	32.0534	160	32.0534	189	32.0534	189	32.0534	194	32.0534	201	32.0534	204
32.0704	155	32.0704	160	32.0704	185	32.0704	172	32.0704	179	32.0704	190	32.0704	173	32.0704	185	32.0704	198	32.0704	198	32.0704	208	32.0704	206	32.0704	178
32.0874	185	32.0874	177	32.0874	195	32.0874	203	32.0874	178	32.0874	171	32.0874	190	32.0874	183	32.0874	188	32.0874	188	32.0874	212	32.0874	189	32.0874	207
32.1044	167	32.1044	170	32.1044	173	32.1044	196	32.1044	175	32.1044	159	32.1044	202	32.1044	165	32.1044	174	32.1044	174	32.1044	207	32.1044	202	32.1044	207
32.1214	171	32.1214	189	32.1214	193	32.1214	185	32.1214	193	32.1214	164	32.1214	177	32.1214	162	32.1214	194	32.1214	194	32.1214	191	32.1214	204	32.1214	192
32.1384	168	32.1384	168	32.1384	167	32.1384	175	32.1384	178	32.1384	160	32.1384	180	32.1384	157	32.1384	177	32.1384	177	32.1384	174	32.1384	187	32.1384	194
32.1554	163	32.1554	157	32.1554	189	32.1554	180	32.1554	170	32.1554	176	32.1554	157	32.1554	171	32.1554	182	32.1554	182	32.1554	195	32.1554	189	32.1554	185
32.1724	147	32.1724	160	32.1724	167	32.1724	167	32.1724	171	32.1724	168	32.1724	192	32.1724	155	32.1724	180	32.1724	180	32.1724	183	32.1724	190	32.1724	179
32.1894	188	32.1894	158	32.1894	181	32.1894	171	32.1894	154	32.1894	172	32.1894	162	32.1894	153	32.1894	198	32.1894	198	32.1894	179	32.1894	205	32.1894	186
32.2064	150	32.2064	170	32.2064	129	32.2064	153	32.2064	173	32.2064	167	32.2064	150	32.2064	161	32.2064	177	32.2064	177	32.2064	189	32.2064	171	32.2064	170
32.2234	160	32.2234	184	32.2234	150	32.2234	151	32.2234	162	32.2234	191	32.2234	170	32.2234	162	32.2234	173	32.2234	173	32.2234	194	32.2234	205	32.2234	180
32.2404	163	32.2404	119	32.2404	174	32.2404	177	32.2404	158	32.2404	151	32.2404	174	32.2404	173	32.2404	172	32.2404	172	32.2404	160	32.2404	168	32.2404	172
32.2574	146	32.2574	146	32.2574	168	32.2574	160	32.2574	162	32.2574	148	32.2574	184	32.2574	158	32.2574	152	32.2574	152	32.2574	158	32.2574	178	32.2574	169
32.2744	150	32.2744	156	32.2744	163	32.2744	171	32.2744	152	32.2744	158	32.2744	136	32.2744	146	32.2744	188	32.2744	188	32.2744	173	32.2744	194	32.2744	187
32.2914	164	32.2914	144	32.2914	152	32.2914	166	32.2914	141	32.2914	154	32.2914	144	32.2914	129	32.2914	198	32.2914	198	32.2914	173	32.2914	166	32.2914	165
32.3084	159	32.3084	160	32.3084	157	32.3084	135	32.3084	150	32.3084	144	32.3084	167	32.3084	138	32.3084	193	32.3084	193	32.3084	157	32.3084	156	32.3084	171
32.3254	148	32.3254	148	32.3254	153	32.3254	161	32.3254	160	32.3254	169	32.3254	158	32.3254	151	32.3254	162	32.3254	162	32.3254	172	32.3254	146	32.3254	166
32.3424	179	32.3424	154	32.3424	165	32.3424	151	32.3424	169	32.3424	162	32.3424	146	32.3424	142	32.3424	165	32.3424	165	32.3424	165	32.3424	152	32.3424	165
32.3594	147	32.3594	136	32.3594	136	32.3594	136	32.3594	144	32.3594	160	32.3594	153	32.3594	135	32.3594	157	32.3594	157	32.3594	171	32.3594	176	32.3594	145
32.3764	154	32.3764	142	32.3764	135	32.3764	174	32.3764	143	32.3764	177	32.3764	163	32.3764	131	32.3764	159	32.3764	159	32.3764	161	32.3764	168	32.3764	156
32.3934	138	32.3934	147	32.3934	148	32.3934	150	32.3934	149	32.3934	157	32.3934	160	32.3934	138	32.3934	152	32.3934	152	32.3934	178	32.3934	151	32.3934	176
32.4104	120	32.4104	150	32.4104	167	32.4104	153	32.4104	142	32.4104	137	32.4104	150	32.4104	136	32.4104	158	32.4104	158	32.4104	158	32.4104	170	32.4104	158
32.4274	139	32.4274	133	32.4274	130	32.4274	155	32.4274	151	32.4274	134	32.4274	152	32.4274	144	32.4274	185	32.4274	185	32.4274	167	32.4274	157	32.4274	159
32.4444	143	32.4444	137	32.4444	139	32.4444	157	32.4444	144	32.4444	150	32.4444	150	32.4444	146	32.4444	163	32.4444	163	32.4444	176	32.4444	191	32.4444	168
32.4614	122	32.4614	137	32.4614	144	32.4614	145	32.4614	153	32.4614	143	32.4614	147	32.4614	148	32.4614	156	32.4614	156	32.4614	157	32.4614	192	32.4614	154
32.4784	126	32.4784	147	32.4784	135	32.4784	171	32.4784	159	32.4784	148	32.4784	156	32.4784	147	32.4784	152	32.4784	152	32.4784	141	32.4784	187	32.4784	156
32.4954	125	32.4954	145	32.4954	139	32.4954	148	32.4954	152	32.4954	140	32.4954	160	32.4954	159	32.4954	158	32.4954	158	32.4954	149	32.4954	162	32.4954	146
32.5124	143	32.5124	158	32.5124	143	32.5124	148	32.5124	154	32.5124	151	32.5124	152	32.5124	152	32.5124	162	32.5124	162	32.5124	170	32.5124	152	32.5124	153
32.5294	146	32.5294	149	32.5294	155	32.5294	152	32.5294	157	32.5294	151	32.5294	159	32.5294	135	32.5294	168	32.5294	168	32.5294	135	32.5294	146	32.5294	160
32.5464	146	32.5464	143	32.5464	140	32.5464	146	32.5464	140	32.5464	148	32.5464	167	32.5464	132	32.5464	165	32.5464	165	32.5464	149	32.5464	167	32.5464	155
32.5634	141	32.5634	132	32.5634	144	32.5634	150	32.5634	157	32.5634	146	32.5634	149	32.5634	145	32.5634	154	32.5634	154	32.5634	165	32.5634	157	32.5634	140
32.5804	147	32.5804	123	32.5804	143	32.5804	140	32.5804	148	32.5804	152	32.5804	155	32.5804	147	32.5804	135	32.5804	135	32.5804	161	32.5804	158	32.5804	161
32.5974	142	32.5974	138	32.5974	139	32.5974	139	32.5974	145	32.5974	149	32.5974	138	32.5974	136	32.5974	149	32.5974	149	32.5974	159	32.5974	160	32.5974	148
32.6144	123	32.6144	143	32.6144	143	32.6144	159	32.6144	154	32.6144	145	32.6144	138	32.6144	126	32.6144	152	32.6144	152	32.6144	142	32.6144	163	32.6144	139
32.6314	138	32.6314	166	32.6314	151	32.6314	157	32.6314	161	32.6314	144	32.6314	130	32.6314	130	32.6314	157	32.6314	157	32.6314	140	32.6314	158	32.6314	154
32.6484	144	32.6484	161	32.6484	136	32.6484	150	32.6484	147	32.6484	145	32.6484	134	32.6484	133	32.6484	153	32.6484	153	32.6484	159	32.6484	152	32.6484	147
32.6654	154	32.6654	143	32.6654	129	32.6654	147	32.6654	157	32.6654	151	32.6654	141	32.6654	141	32.6654	163	32.6654	163	32.6654	159	32.6654	160	32.6654	145
32.6824	146	32.6824	145	32.6824	127	32.6824	136	32.6824	145	32.6824	161	32.6824	129	32.6824	142	32.6824	159	32.6824	159	32.6824	150	32.6824	165	32.6824	163
32.6994	126	32.6994	143	32.6994	137	32.6994	139	32.6994	142	32.6994	155	32.6994	130	32.6994	141	32.6994	150	32.6994	150	32.6994	149	32.6994	154	32.6994	152
32.7164	142	32.7164	135	32.7164	133	32.7164	156	32.7164	143	32.7164	138	32.7164	151	32.7164	146	32.7164	154	32.7164	154	32.7164	153	32.7164	161	32.7164	154
32.7334	150	32.7334	137	32.7334	137	32.7334	162	32.7334	139	32.7334	140	32.7334	146	32.7334	152	32.7334	165	32.7334	165	32.7334	138	32.7334	172	32.7334	149
32.7504	144	32.7504	145	32.7504	139	32.7504	155	32.7504	147	32.7504	140	32.7504	142	32.7504	147	32.7504	159	32.7504	159	32.7504	130	32.7504	171	32.7504	154
32.7674	137	32.7674	151	32.7674	147	32.7674	149	32.7674	138	32.7674	145	32.7674	149	32.7674	141	32.7674	138	32.7674	138	32.7674	160	32.7674	149	32.7674	160
32.7844	140	32.7844	148	32.7844	161	32.7844	137	32.7844	131	32.7844	140	32.7844	148	32.7844	147	32.7844	149	32.7844	149	32.7844	173	32.7844	149	32.7844	155
32.8014	137	32.8014	143	32.8014	148	32.8014	129	32.8014	149	32.8014	140	32.8014	143	32.8014	148	32.8014	163	32.8014	163	32.8014	171	32.8014	156	32.8014	151
32.8184	134	32.8184	137	32.8184	144	32.8184	140	32.8184	140	32.8184	143	32.8184	147	32.8184	147	32.8184	148	32.8184	148	32.8184	159	32.8184	163	32.8184	154
32.8354	140	32.8354	135	32.8354	159	32.8354	144	32.8354	128	32.8354	150	32.8354	168	32.8354	157	32.8354	166	32.8354	166	32.8354	146	32.8354	154	32.8354	158
32.8524	148	32.8524	135	32.8524	148	32.8524	135	32.8524	129	32.8524	147	32.8524	153	32.8524	149	32.8524	180	32.8524	180	32.8524	148	32.8524	153	32.8524	158
32.8694	142	32.8694	136	32.8694	141	32.8694	139	32.8694	143	32.8694	153	32.8694	144	32.8694	152	32.8694	165	32.8694	165	32.8694	155	32.8694	172	32.8694	155
32.8864	136	32.8864	137	32.8864	138	32.8864	146	32.8864	146	32.8864	168	32.8864	158	32.8864	146	32.8864	163	32.8864	163	32.8864	157	32.8864	179	32.8864	157
32.9034	125	32.9034	137	32.9034	139	32.9034	152	32.9034	145	32.9034	141	32.9034	155	32.9034	142	32.9034	167	32.9034	167	32.9034	156	32.9034	163	32.9034	150
32.9204	138	32.9204	133	32.9204	143	32.9204	151	32.9204	150	32.9204	144	32.9204	157	32.9204	139	32.9204	168	32.9204	168	32.9204	153	32.9204	165	32.9204	156
32.9374	137	32.9374	146	32.9374	152	32.9374	155	32.9374	151	32.9374	165	32.9374	169	32.9374	148	32.9374	150	32.9374	150	32.9374	153	32.9374	173	32.9374	155
32.9544	131	32.9544	158	32.9544	143	32.9544	150	32.9544	156	32.9544	157	32.9544	165	32.9544	138	32.9544	165	32.9544	165	32.9544	169	32.9544	159	32.9544	146
32.9714	152	32.9714	144	32.9714	155	32.9714	144	32.9714	140	32.9714	157	32.9714	144	32.9714	145	32.9714	155	32.9714	155	32.9714	172	32.9714	163	32.9714	144
32.9884	155	32.9884	159	32.9884	132	32.9884	148	32.9884	135	32.9884	142	32.9884	159	32.9884	150	32.9884	171	32.9884	171	32.9884	172	32.9884	166	32.9884	194
33.0054	152	33.0054	147	33.0054	134	33.0054	141	33.0054	177	33.0054	159	33.0054	157	33.0054	158	33.0054	165	33.0054	165	33.0054	166	33.0054	192	33.0054	170
33.0224	140	33.0224	154	33.0224	158	33.0224	152	33.0224	165	33.0224	175	33.0224	151	33.0224	170	33.0224	182	33.0224	182	33.0224	165	33.0224	181	33.0224	168
33.0394	150	33.0394	158	33.0394	147	33.0394	166	33.0394	166	33.0394	181	33.0394	152	33.0394	172	33.0394	161	33.0394	161	33.0394	165	33.0394	182	33.0394	181
33.0564	138	33.0564	161	33.0564	161	33.0564	148	33.0564	165	33.0564	192	33.0564	147	33.0564	161	33.0564	164	33.0564	164	33.0564	170	33.0564	179	33.0564	160
33.0734	153	33.0734	136	33.0734	161	33.0734	158	33.0734	173	33.0734	167	33.0734	167	33.0734	188	33.0734	174	33.0734	174	33.0734	181	33.0734	190	33.0734	161
33.0904	133	33.0904	142	33.0904	169	33.0904	149	33.0904	164	33.0904	146	33.0904	151	33.0904	175	33.0904	160	33.0904	160	33.0904	196	33.0904	193	33.0904	181
33.1074	137	33.1074	159	33.1074	158	33.1074	147	33.1074	165	33.1074	158	33.1074	156	33.1074	152	33.1074	172	33.1074	172	33.1074	182	33.1074	182	33.1074	196
33.1244	151	33.1244	151	33.1244	160	33.1244	162	33.1244	152	33.1244	191	33.1244	169	33.1244	142	33.1244	186	33.1244	186	33.1244	140	33.1244	181	33.1244	196
33.1414	171	33.1414	161	33.1414	162	33.1414	158	33.1414	137	33.1414	165	33.1414	175	33.1414	162	33.1414	181	33.1414	181	33.1414	169	33.1414	170	33.1414	186
33.1584	159	33.1584	140	33.1584	149	33.1584	159	33.1584	136	33.1584	165	33.1584	175	33.1584	164	33.1584	167	33.1584	167	33.1584	166	33.1584	175	33.1584	177
33.1754	168	33.1754	175	33.1754	165	33.1754	176	33.1754	133	33.1754	167	33.1754	158	33.1754	153	33.1754	146	33.1754	146	33.1754	190	33.1754	201	33.1754	188
33.1924	144	33.1924	129	33.1924	165	33.1924	164	33.1924	148	33.1924	150	33.1924	183	33.1924	153	33.1924	149	33.1924	149	33.1924	161	33.1924	183	33.1924	183
33.2094	177	33.2094	126	33.2094	150	33.2094	134	33.2094	163	33.2094	154	33.2094	163	33.2094	148	33.2094	174	33.2094	174	33.2094	176	33.2094	181	33.2094	185
33.2264	149	33.2264	140	33.2264	141	33.2264	168	33.2264	141	33.2264	148	33.2264	164	33.2264	144	33.2264	142	33.2264	142	33.2264	150	33.2264	156	33.2264	180
33.2434	148	33.2434	151	33.2434	167	33.2434	136	33.2434	138	33.2434	150	33.2434	173	33.2434	135	33.2434	198	33.2434	198	33.2434	195	33.2434	183	33.2434	166
33.2604	141	33.2604	146	33.2604	164	33.2604	168	33.2604	148	33.2604	171	33.2604	174	33.2604	158	33.2604	176	33.2604	176	33.2604	172	33.2604	168	33.2604	182
33.2774	160	33.2774	164	33.2774	148	33.2774	149	33.2774	152	33.2774	144	33.2774	181	33.2774	169	33.2774	180	33.2774	180	33.2774	167	33.2774	165	33.2774	170
33.2944	184	33.2944	148	33.2944	159	33.2944	140	33.2944	153	33.2944	160	33.2944	147	33.2944	161	33.2944	172	33.2944	172	33.2944	164	33.2944	177	33.2944	190
33.3114	159	33.3114	161	33.3114	163	33.3114	146	33.3114	139	33.3114	138	33.3114	151	33.3114	166	33.3114	168	33.3114	168	33.3114	170	33.3114	163	33.3114	160
33.3284	138	33.3284	162	33.3284	152	33.3284	158	33.3284	124	33.3284	147	33.3284	162	33.3284	161	33.3284	184	33.3284	184	33.3284	164	33.3284	172	33.3284	176
33.3454	158	33.3454	145	33.3454	157	33.3454	152	33.3454	161	33.3454	162	33.3454	149	33.3454	149	33.3454	181	33.3454	181	33.3454	170	33.3454	178	33.3454	196
33.3624	172	33.3624	164	33.3624	155	33.3624	144	33.3624	151	33.3624	158	33.3624	129	33.3624	147	33.3624	177	33.3624	177	33.3624	166	33.3624	157	33.3624	174
33.3794	136	33.3794	162	33.3794	169	33.3794	156	33.3794	147	33.3794	159	33.3794	161	33.3794	160	33.3794	175	33.3794	175	33.3794	190	33.3794	189	33.3794	171
33.3964	173	33.3964	154	33.3964	148	33.3964	164	33.3964	139	33.3964	164	33.3964	173	33.3964	157	33.3964	159	33.3964	159	33.3964	180	33.3964	182	33.3964	161
33.4134	153	33.4134	161	33.4134	148	33.4134	157	33.4134	147	33.4134	173	33.4134	173	33.4134	163	33.4134	188	33.4134	188	33.4134	177	33.4134	175	33.4134	180
33.4304	153	33.4304	162	33.4304	167	33.4304	161	33.4304	156	33.4304	158	33.4304	183	33.4304	164	33.4304	178	33.4304	178	33.4304	188	33.4304	204	33.4304	177
33.4474	158	33.4474	173	33.4474	165	33.4474	159	33.4474	162	33.4474	172	33.4474	181	33.4474	163	33.4474	166	33.4474	166	33.4474	170	33.4474	178	33.4474	161
33.4644	151	33.4644	158	33.4644	162	33.4644	156	33.4644	150	33.4644	151	33.4644	180	33.4644	172	33.4644	172	33.4644	172	33.4644	202	33.4644	170	33.4644	196
33.4814	156	33.4814	140	33.4814	148	33.4814	165	33.4814	167	33.4814	166	33.4814	177	33.4814	155	33.4814	189	33.4814	189	33.4814	177	33.4814	180	33.4814	188
33.4984	148	33.4984	143	33.4984	152	33.4984	162	33.4984	182	33.4984	139	33.4984	182	33.4984	167	33.4984	178	33.4984	178	33.4984	173	33.4984	165	33.4984	172
33.5154	159	33.5154	159	33.5154	161	33.5154	175	33.5154	174	33.5154	147	33.5154	170	33.5154	157	33.5154	178	33.5154	178	33.5154	193	33.5154	164	33.5154	173
33.5324	164	33.5324	150	33.5324	152	33.5324	162	33.5324	159	33.5324	151	33.5324	186	33.5324	143	33.5324	166	33.5324	166	33.5324	187	33.5324	186	33.5324	167
33.5494	154	33.5494	157	33.5494	159	33.5494	157	33.5494	146	33.5494	141	33.5494	172	33.5494	167	33.5494	183	33.5494	183	33.5494	185	33.5494	190	33.5494	168
33.5664	124	33.5664	145	33.5664	161	33.5664	151	33.5664	168	33.5664	153	33.5664	158	33.5664	175	33.5664	184	33.5664	184	33.5664	177	33.5664	170	33.5664	173
33.5834	147	33.5834	148	33.5834	158	33.5834	143	33.5834	166	33.5834	162	33.5834	158	33.5834	149	33.5834	156	33.5834	156	33.5834	177	33.5834	184	33.5834	156
33.6004	151	33.6004	151	33.6004	128	33.6004	145	33.6004	141	33.6004	152	33.6004	154	33.6004	158	33.6004	166	33.6004	166	33.6004	178	33.6004	194	33.6004	159
33.6174	160	33.6174	152	33.6174	139	33.6174	163	33.6174	143	33.6174	146	33.6174	161	33.6174	155	33.6174	172	33.6174	172	33.6174	174	33.6174	170	33.6174	156
33.6344	171	33.6344	159	33.6344	151	33.6344	150	33.6344	146	33.6344	143	33.6344	162	33.6344	148	33.6344	171	33.6344	171	33.6344	175	33.6344	162	33.6344	165
33.6514	167	33.6514	153	33.6514	149	33.6514	141	33.6514	132	33.6514	145	33.6514	154	33.6514	155	33.6514	174	33.6514	174	33.6514	172	33.6514	165	33.6514	159
33.6684	148	33.6684	146	33.6684	137	33.6684	135	33.6684	143	33.6684	135	33.6684	150	33.6684	136	33.6684	169	33.6684	169	33.6684	166	33.6684	168	33.6684	167
33.6854	139	33.6854	151	33.6854	144	33.6854	154	33.6854	155	33.6854	136	33.6854	151	33.6854	124	33.6854	162	33.6854	162	33.6854	162	33.6854	170	33.6854	187
33.7024	138	33.7024	156	33.7024	155	33.7024	153	33.7024	148	33.7024	151	33.7024	145	33.7024	126	33.7024	163	33.7024	163	33.7024	150	33.7024	164	33.7024	177
33.7194	136	33.7194	152	33.7194	146	33.7194	145	33.7194	145	33.7194	158	33.7194	150	33.7194	130	33.7194	171	33.7194	171	33.7194	151	33.7194	154	33.7194	164
33.7364	140	33.7364	146	33.7364	150	33.7364	141	33.7364	137	33.7364	159	33.7364	157	33.7364	131	33.7364	182	33.7364	182	33.7364	161	33.7364	161	33.7364	172
33.7534	154	33.7534	134	33.7534	140	33.7534	136	33.7534	135	33.7534	150	33.7534	146	33.7534	139	33.7534	178	33.7534	178	33.7534	162	33.7534	167	33.7534	170
33.7704	152	33.7704	137	33.7704	131	33.7704	145	33.7704	141	33.7704	151	33.7704	139	33.7704	145	33.7704	173	33.7704	173	33.7704	158	33.7704	167	33.7704	148
33.7874	127	33.7874	140	33.7874	137	33.7874	145	33.7874	146	33.7874	154	33.7874	148	33.7874	143	33.7874	158	33.7874	158	33.7874	158	33.7874	165	33.7874	149
33.8044	127	33.8044	131	33.8044	148	33.8044	138	33.8044	142	33.8044	142	33.8044	155	33.8044	145	33.8044	150	33.8044	150	33.8044	161	33.8044	163	33.8044	158
33.8214	142	33.8214	131	33.8214	146	33.8214	158	33.8214	141	33.8214	143	33.8214	159	33.8214	159	33.8214	158	33.8214	158	33.8214	161	33.8214	174	33.8214	160
33.8384	145	33.8384	138	33.8384	137	33.8384	157	33.8384	148	33.8384	141	33.8384	158	33.8384	156	33.8384	165	33.8384	165	33.8384	167	33.8384	173	33.8384	159
33.8554	130	33.8554	135	33.8554	132	33.8554	155	33.8554	138	33.8554	149	33.8554	158	33.8554	147	33.8554	171	33.8554	171	33.8554	163	33.8554	166	33.8554	162
33.8724	141	33.8724	114	33.8724	138	33.8724	146	33.8724	142	33.8724	156	33.8724	138	33.8724	148	33.8724	170	33.8724	170	33.8724	158	33.8724	169	33.8724	153
33.8894	159	33.8894	144	33.8894	142	33.8894	127	33.8894	151	33.8894	156	33.8894	147	33.8894	150	33.8894	162	33.8894	162	33.8894	173	33.8894	173	33.8894	162
33.9064	143	33.9064	156	33.9064	143	33.9064	146	33.9064	129	33.9064	149	33.9064	153	33.9064	141	33.9064	174	33.9064	174	33.9064	170	33.9064	171	33.9064	163
33.9234	133	33.9234	149	33.9234	140	33.9234	140	33.9234	135	33.9234	146	33.9234	156	33.9234	141	33.9234	175	33.9234	175	33.9234	143	33.9234	176	33.9234	164
33.9404	144	33.9404	138	33.9404	146	33.9404	130	33.9404	155	33.9404	146	33.9404	158	33.9404	149	33.9404	178	33.9404	178	33.9404	150	33.9404	170	33.9404	150
33.9574	149	33.9574	154	33.9574	162	33.9574	145	33.9574	140	33.9574	137	33.9574	134	33.9574	168	33.9574	161	33.9574	161	33.9574	185	33.9574	168	33.9574	160
33.9744	133	33.9744	154	33.9744	174	33.9744	150	33.9744	144	33.9744	149	33.9744	157	33.9744	141	33.9744	163	33.9744	163	33.9744	165	33.9744	186	33.9744	173
33.9914	152	33.9914	126	33.9914	135	33.9914	152	33.9914	134	33.9914	153	33.9914	168	33.9914	130	33.9914	163	33.9914	163	33.9914	177	33.9914	169	33.9914	162
34.0084	168	34.0084	144	34.0084	124	34.0084	144	34.0084	151	34.0084	161	34.0084	154	34.0084	130	34.0084	177	34.0084	177	34.0084	189	34.0084	180	34.0084	180
34.0254	155	34.0254	138	34.0254	147	34.0254	151	34.0254	147	34.0254	151	34.0254	171	34.0254	135	34.0254	165	34.0254	165	34.0254	160	34.0254	174	34.0254	185
34.0424	147	34.0424	145	34.0424	159	34.0424	140	34.0424	159	34.0424	157	34.0424	156	34.0424	152	34.0424	177	34.0424	177	34.0424	180	34.0424	185	34.0424	171
34.0594	142	34.0594	159	34.0594	148	34.0594	149	34.0594	144	34.0594	147	34.0594	144	34.0594	148	34.0594	170	34.0594	170	34.0594	169	34.0594	157	34.0594	172
34.0764	144	34.0764	154	34.0764	137	34.0764	139	34.0764	151	34.0764	152	34.0764	159	34.0764	168	34.0764	163	34.0764	163	34.0764	172	34.0764	174	34.0764	186
34.0934	148	34.0934	146	34.0934	128	34.0934	161	34.0934	131	34.0934	158	34.0934	155	34.0934	158	34.0934	166	34.0934	166	34.0934	175	34.0934	170	34.0934	161
34.1104	141	34.1104	155	34.1104	139	34.1104	134	34.1104	150	34.1104	171	34.1104	161	34.1104	173	34.1104	190	34.1104	190	34.1104	165	34.1104	156	34.1104	165
34.1274	140	34.1274	166	34.1274	149	34.1274	145	34.1274	151	34.1274	167	34.1274	182	34.1274	139	34.1274	168	34.1274	168	34.1274	180	34.1274	172	34.1274	174
34.1444	151	34.1444	150	34.1444	165	34.1444	158	34.1444	134	34.1444	172	34.1444	164	34.1444	172	34.1444	168	34.1444	168	34.1444	185	34.1444	182	34.1444	175
34.1614	137	34.1614	154	34.1614	168	34.1614	161	34.1614	139	34.1614	152	34.1614	167	34.1614	184	34.1614	184	34.1614	184	34.1614	179	34.1614	180	34.1614	190
34.1784	149	34.1784	159	34.1784	118	34.1784	173	34.1784	174	34.1784	154	34.1784	157	34.1784	168	34.1784	203	34.1784	203	34.1784	167	34.1784	177	34.1784	173
34.1954	195	34.1954	146	34.1954	155	34.1954	155	34.1954	154	34.1954	137	34.1954	170	34.1954	166	34.1954	185	34.1954	185	34.1954	181	34.1954	188	34.1954	181
34.2124	146	34.2124	138	34.2124	146	34.2124	151	34.2124	162	34.2124	166	34.2124	154	34.2124	171	34.2124	159	34.2124	159	34.2124	200	34.2124	213	34.2124	156
34.2294	182	34.2294	182	34.2294	169	34.2294	161	34.2294	137	34.2294	174	34.2294	161	34.2294	185	34.2294	176	34.2294	176	34.2294	199	34.2294	191	34.2294	187
34.2464	134	34.2464	173	34.2464	166	34.2464	168	34.2464	161	34.2464	185	34.2464	171	34.2464	180	34.2464	166	34.2464	166	34.2464	200	34.2464	180	34.2464	217
34.2634	162	34.2634	151	34.2634	144	34.2634	163	34.2634	164	34.2634	183	34.2634	156	34.2634	143	34.2634	200	34.2634	200	34.2634	177	34.2634	208	34.2634	181
34.2804	178	34.2804	159	34.2804	163	34.2804	187	34.2804	153	34.2804	174	34.2804	166	34.2804	181	34.2804	190	34.2804	190	34.2804	195	34.2804	184	34.2804	161
34.2974	178	34.2974	172	34.2974	150	34.2974	166	34.2974	150	34.2974	177	34.2974	174	34.2974	180	34.2974	215	34.2974	215	34.2974	210	34.2974	209	34.2974	180
34.3144	166	34.3144	158	34.3144	178	34.3144	185	34.3144	163	34.3144	162	34.3144	177	34.3144	212	34.3144	223	34.3144	223	34.3144	210	34.3144	194	34.3144	214
34.3314	153	34.3314	174	34.3314	167	34.3314	201	34.3314	160	34.3314	161	34.3314	158	34.3314	187	34.3314	200	34.3314	200	34.3314	206	34.3314	196	34.3314	216
34.3484	177	34.3484	172	34.3484	189	34.3484	173	34.3484	189	34.3484	161	34.3484	195	34.3484	170	34.3484	214	34.3484	214	34.3484	195	34.3484	199	34.3484	207
34.3654	182	34.3654	178	34.3654	166	34.3654	161	34.3654	177	34.3654	205	34.3654	189	34.3654	192	34.3654	217	34.3654	217	34.3654	222	34.3654	218	34.3654	182
34.3824	210	34.3824	195	34.3824	175	34.3824	180	34.3824	162	34.3824	169	34.3824	194	34.3824	196	34.3824	203	34.3824	203	34.3824	214	34.3824	198	34.3824	211
34.3994	189	34.3994	185	34.3994	161	34.3994	192	34.3994	172	34.3994	170	34.3994	200	34.3994	198	34.3994	244	34.3994	244	34.3994	239	34.3994	220	34.3994	193
34.4164	177	34.4164	187	34.4164	175	34.4164	183	34.4164	163	34.4164	194	34.4164	191	34.4164	220	34.4164	234	34.4164	234	34.4164	214	34.4164	256	34.4164	212
34.4334	204	34.4334	180	34.4334	189	34.4334	197	34.4334	188	34.4334	206	34.4334	209	34.4334	221	34.4334	203	34.4334	203	34.4334	237	34.4334	234	34.4334	217
34.4504	211	34.4504	201	34.4504	192	34.4504	192	34.4504	209	34.4504	205	34.4504	211	34.4504	211	34.4504	239	34.4504	239	34.4504	239	34.4504	201	34.4504	218
34.4674	189	34.4674	200	34.4674	222	34.4674	172	34.4674	204	34.4674	209	34.4674	206	34.4674	224	34.4674	249	34.4674	249	34.4674	261	34.4674	246	34.4674	249
34.4844	214	34.4844	219	34.4844	214	34.4844	190	34.4844	216	34.4844	220	34.4844	215	34.4844	231	34.4844	247	34.4844	247	34.4844	268	34.4844	260	34.4844	264
34.5014	234	34.5014	231	34.5014	225	34.5014	216	34.5014	217	34.5014	202	34.5014	219	34.5014	241	34.5014	263	34.5014	263	34.5014	276	34.5014	255	34.5014	251
34.5184	239	34.5184	211	34.5184	226	34.5184	211	34.5184	217	34.5184	219	34.5184	223	34.5184	242	34.5184	264	34.5184	264	34.5184	271	34.5184	230	34.5184	268
34.5354	233	34.5354	206	34.5354	207	34.5354	216	34.5354	204	34.5354	233	34.5354	236	34.5354	229	34.5354	264	34.5354	264	34.5354	250	34.5354	259	34.5354	248
34.5524	209	34.5524	215	34.5524	220	34.5524	217	34.5524	202	34.5524	240	34.5524	232	34.5524	251	34.5524	263	34.5524	263	34.5524	236	34.5524	263	34.5524	242
34.5694	219	34.5694	220	34.5694	231	34.5694	219	34.5694	212	34.5694	223	34.5694	222	34.5694	252	34.5694	272	34.5694	272	34.5694	241	34.5694	240	34.5694	271
34.5864	227	34.5864	196	34.5864	233	34.5864	228	34.5864	234	34.5864	217	34.5864	243	34.5864	234	34.5864	249	34.5864	249	34.5864	220	34.5864	258	34.5864	282
34.6034	220	34.6034	213	34.6034	200	34.6034	243	34.6034	232	34.6034	223	34.6034	245	34.6034	227	34.6034	262	34.6034	262	34.6034	244	34.6034	242	34.6034	262
34.6204	200	34.6204	229	34.6204	213	34.6204	237	34.6204	246	34.6204	224	34.6204	220	34.6204	225	34.6204	279	34.6204	279	34.6204	250	34.6204	228	34.6204	266
34.6374	204	34.6374	214	34.6374	223	34.6374	243	34.6374	233	34.6374	211	34.6374	223	34.6374	228	34.6374	265	34.6374	265	34.6374	256	34.6374	236	34.6374	263
34.6544	203	34.6544	208	34.6544	231	34.6544	239	34.6544	208	34.6544	208	34.6544	252	34.6544	227	34.6544	251	34.6544	251	34.6544	275	34.6544	260	34.6544	245
34.6714	202	34.6714	200	34.6714	219	34.6714	235	34.6714	215	34.6714	216	34.6714	246	34.6714	229	34.6714	262	34.6714	262	34.6714	265	34.6714	266	34.6714	257
34.6884	221	34.6884	200	34.6884	203	34.6884	225	34.6884	224	34.6884	218	34.6884	227	34.6884	232	34.6884	259	34.6884	259	34.6884	250	34.6884	266	34.6884	277
34.7054	202	34.7054	217	34.7054	208	34.7054	211	34.7054	213	34.7054	206	34.7054	224	34.7054	239	34.7054	246	34.7054	246	34.7054	247	34.7054	266	34.7054	247
34.7224	194	34.7224	210	34.7224	232	34.7224	210	34.7224	206	34.7224	205	34.7224	227	34.7224	230	34.7224	258	34.7224	258	34.7224	259	34.7224	245	34.7224	247
34.7394	211	34.7394	207	34.7394	219	34.7394	191	34.7394	212	34.7394	205	34.7394	236	34.7394	225	34.7394	266	34.7394	266	34.7394	272	34.7394	248	34.7394	250
34.7564	222	34.7564	224	34.7564	200	34.7564	196	34.7564	217	34.7564	211	34.7564	244	34.7564	234	34.7564	253	34.7564	253	34.7564	267	34.7564	249	34.7564	237
34.7734	218	34.7734	226	34.7734	222	34.7734	210	34.7734	220	34.7734	215	34.7734	231	34.7734	236	34.7734	239	34.7734	239	34.7734	259	34.7734	245	34.7734	237
34.7904	215	34.7904	217	34.7904	228	34.7904	220	34.7904	236	34.7904	216	34.7904	250	34.7904	237	34.7904	258	34.7904	258	34.7904	249	34.7904	254	34.7904	240
34.8074	219	34.8074	216	34.8074	229	34.8074	215	34.8074	221	34.8074	247	34.8074	255	34.8074	252	34.8074	274	34.8074	274	34.8074	246	34.8074	282	34.8074	249
34.8244	210	34.8244	203	34.8244	240	34.8244	212	34.8244	228	34.8244	248	34.8244	232	34.8244	256	34.8244	270	34.8244	270	34.8244	265	34.8244	281	34.8244	265
34.8414	238	34.8414	208	34.8414	228	34.8414	227	34.8414	223	34.8414	236	34.8414	228	34.8414	253	34.8414	272	34.8414	272	34.8414	276	34.8414	274	34.8414	249
34.8584	219	34.8584	229	34.8584	249	34.8584	237	34.8584	238	34.8584	248	34.8584	260	34.8584	264	34.8584	271	34.8584	271	34.8584	267	34.8584	267	34.8584	268
34.8754	229	34.8754	228	34.8754	231	34.8754	248	34.8754	248	34.8754	256	34.8754	262	34.8754	280	34.8754	283	34.8754	283	34.8754	274	34.8754	269	34.8754	286
34.8924	252	34.8924	246	34.8924	231	34.8924	253	34.8924	250	34.8924	258	34.8924	259	34.8924	267	34.8924	307	34.8924	307	34.8924	294	34.8924	290	34.8924	299
34.9094	257	34.9094	251	34.9094	259	34.9094	244	34.9094	269	34.9094	265	34.9094	265	34.9094	281	34.9094	307	34.9094	307	34.9094	292	34.9094	298	34.9094	289
34.9264	252	34.9264	245	34.9264	266	34.9264	258	34.9264	249	34.9264	252	34.9264	284	34.9264	285	34.9264	293	34.9264	293	34.9264	303	34.9264	326	34.9264	314
34.9434	282	34.9434	260	34.9434	282	34.9434	266	34.9434	261	34.9434	265	34.9434	282	34.9434	261	34.9434	287	34.9434	287	34.9434	308	34.9434	344	34.9434	296
34.9604	251	34.9604	271	34.9604	292	34.9604	284	34.9604	246	34.9604	262	34.9604	262	34.9604	267	34.9604	321	34.9604	321	34.9604	321	34.9604	343	34.9604	288
34.9774	248	34.9774	282	34.9774	272	34.9774	284	34.9774	262	34.9774	276	34.9774	280	34.9774	293	34.9774	341	34.9774	341	34.9774	304	34.9774	305	34.9774	324
34.9944	275	34.9944	294	34.9944	286	34.9944	307	34.9944	269	34.9944	297	34.9944	282	34.9944	264	34.9944	332	34.9944	332	34.9944	319	34.9944	321	34.9944	287
35.0114	249	35.0114	243	35.0114	263	35.0114	288	35.0114	251	35.0114	301	35.0114	282	35.0114	289	35.0114	325	35.0114	325	35.0114	300	35.0114	331	35.0114	335
35.0284	255	35.0284	237	35.0284	277	35.0284	293	35.0284	293	35.0284	269	35.0284	270	35.0284	291	35.0284	318	35.0284	318	35.0284	304	35.0284	350	35.0284	332
35.0454	287	35.0454	275	35.0454	278	35.0454	274	35.0454	272	35.0454	288	35.0454	260	35.0454	277	35.0454	338	35.0454	338	35.0454	327	35.0454	315	35.0454	321
35.0624	257	35.0624	244	35.0624	259	35.0624	270	35.0624	263	35.0624	262	35.0624	261	35.0624	268	35.0624	323	35.0624	323	35.0624	315	35.0624	312	35.0624	311
35.0794	222	35.0794	248	35.0794	261	35.0794	261	35.0794	261	35.0794	280	35.0794	267	35.0794	262	35.0794	307	35.0794	307	35.0794	297	35.0794	303	35.0794	295
35.0964	245	35.0964	220	35.0964	243	35.0964	264	35.0964	236	35.0964	265	35.0964	258	35.0964	273	35.0964	287	35.0964	287	35.0964	263	35.0964	297	35.0964	286
35.1134	226	35.1134	214	35.1134	226	35.1134	253	35.1134	225	35.1134	256	35.1134	251	35.1134	232	35.1134	274	35.1134	274	35.1134	261	35.1134	320	35.1134	282
35.1304	245	35.1304	241	35.1304	226	35.1304	225	35.1304	262	35.1304	225	35.1304	216	35.1304	225	35.1304	281	35.1304	281	35.1304	287	35.1304	266	35.1304	255
35.1474	226	35.1474	231	35.1474	221	35.1474	220	35.1474	246	35.1474	245	35.1474	234	35.1474	198	35.1474	253	35.1474	253	35.1474	275	35.1474	265	35.1474	241
35.1644	224	35.1644	217	35.1644	241	35.1644	212	35.1644	229	35.1644	245	35.1644	241	35.1644	199	35.1644	267	35.1644	267	35.1644	245	35.1644	266	35.1644	255
35.1814	204	35.1814	191	35.1814	223	35.1814	215	35.1814	197	35.1814	207	35.1814	214	35.1814	214	35.1814	262	35.1814	262	35.1814	246	35.1814	240	35.1814	260
35.1984	219	35.1984	196	35.1984	214	35.1984	229	35.1984	213	35.1984	205	35.1984	234	35.1984	225	35.1984	222	35.1984	222	35.1984	257	35.1984	253	35.1984	254
35.2154	180	35.2154	211	35.2154	194	35.2154	212	35.2154	198	35.2154	222	35.2154	247	35.2154	213	35.2154	225	35.2154	225	35.2154	230	35.2154	235	35.2154	228
35.2324	220	35.2324	202	35.2324	212	35.2324	210	35.2324	177	35.2324	201	35.2324	226	35.2324	240	35.2324	224	35.2324	224	35.2324	246	35.2324	211	35.2324	233
35.2494	209	35.2494	204	35.2494	182	35.2494	202	35.2494	200	35.2494	172	35.2494	227	35.2494	180	35.2494	225	35.2494	225	35.2494	215	35.2494	232	35.2494	230
35.2664	189	35.2664	217	35.2664	187	35.2664	196	35.2664	202	35.2664	188	35.2664	196	35.2664	185	35.2664	220	35.2664	220	35.2664	223	35.2664	213	35.2664	244
35.2834	195	35.2834	190	35.2834	190	35.2834	209	35.2834	190	35.2834	207	35.2834	203	35.2834	185	35.2834	247	35.2834	247	35.2834	254	35.2834	207	35.2834	238
35.3004	197	35.3004	198	35.3004	179	35.3004	203	35.3004	191	35.3004	196	35.3004	184	35.3004	184	35.3004	212	35.3004	212	35.3004	182	35.3004	227	35.3004	205
35.3174	196	35.3174	190	35.3174	194	35.3174	207	35.3174	179	35.3174	189	35.3174	218	35.3174	196	35.3174	212	35.3174	212	35.3174	201	35.3174	216	35.3174	200
35.3344	212	35.3344	168	35.3344	184	35.3344	204	35.3344	211	35.3344	177	35.3344	198	35.3344	181	35.3344	228	35.3344	228	35.3344	228	35.3344	249	35.3344	206
35.3514	193	35.3514	195	35.3514	184	35.3514	200	35.3514	188	35.3514	200	35.3514	193	35.3514	205	35.3514	209	35.3514	209	35.3514	215	35.3514	211	35.3514	223
35.3684	180	35.3684	203	35.3684	186	35.3684	187	35.3684	202	35.3684	203	35.3684	188	35.3684	204	35.3684	205	35.3684	205	35.3684	209	35.3684	226	35.3684	227
35.3854	168	35.3854	191	35.3854	166	35.3854	179	35.3854	185	35.3854	170	35.3854	229	35.3854	173	35.3854	219	35.3854	219	35.3854	216	35.3854	223	35.3854	226
35.4024	167	35.4024	192	35.4024	164	35.4024	192	35.4024	189	35.4024	186	35.4024	192	35.4024	183	35.4024	210	35.4024	210	35.4024	196	35.4024	207	35.4024	211
35.4194	185	35.4194	174	35.4194	171	35.4194	188	35.4194	166	35.4194	204	35.4194	189	35.4194	183	35.4194	196	35.4194	196	35.4194	204	35.4194	199	35.4194	206
35.4364	178	35.4364	167	35.4364	185	35.4364	190	35.4364	196	35.4364	192	35.4364	190	35.4364	183	35.4364	191	35.4364	191	35.4364	200	35.4364	224	35.4364	183
35.4534	182	35.4534	169	35.4534	171	35.4534	181	35.4534	175	35.4534	166	35.4534	186	35.4534	190	35.4534	220	35.4534	220	35.4534	185	35.4534	207	35.4534	185
35.4704	173	35.4704	157	35.4704	185	35.4704	152	35.4704	166	35.4704	154	35.4704	188	35.4704	170	35.4704	220	35.4704	220	35.4704	202	35.4704	189	35.4704	210
35.4874	160	35.4874	154	35.4874	175	35.4874	163	35.4874	185	35.4874	176	35.4874	178	35.4874	174	35.4874	199	35.4874	199	35.4874	194	35.4874	202	35.4874	207
35.5044	163	35.5044	160	35.5044	165	35.5044	161	35.5044	176	35.5044	173	35.5044	185	35.5044	166	35.5044	190	35.5044	190	35.5044	200	35.5044	182	35.5044	205
35.5214	172	35.5214	161	35.5214	159	35.5214	165	35.5214	173	35.5214	171	35.5214	191	35.5214	180	35.5214	199	35.5214	199	35.5214	192	35.5214	190	35.5214	198
35.5384	174	35.5384	181	35.5384	174	35.5384	175	35.5384	151	35.5384	157	35.5384	178	35.5384	169	35.5384	200	35.5384	200	35.5384	197	35.5384	216	35.5384	210
35.5554	169	35.5554	174	35.5554	183	35.5554	183	35.5554	150	35.5554	162	35.5554	178	35.5554	158	35.5554	190	35.5554	190	35.5554	206	35.5554	202	35.5554	197
35.5724	163	35.5724	178	35.5724	168	35.5724	173	35.5724	154	35.5724	179	35.5724	174	35.5724	171	35.5724	189	35.5724	189	35.5724	194	35.5724	201	35.5724	186
35.5894	177	35.5894	160	35.5894	176	35.5894	158	35.5894	177	35.5894	172	35.5894	187	35.5894	168	35.5894	178	35.5894	178	35.5894	195	35.5894	195	35.5894	196
35.6064	164	35.6064	161	35.6064	180	35.6064	170	35.6064	183	35.6064	170	35.6064	172	35.6064	160	35.6064	187	35.6064	187	35.6064	193	35.6064	173	35.6064	189
35.6234	153	35.6234	166	35.6234	184	35.6234	166	35.6234	168	35.6234	168	35.6234	177	35.6234	164	35.6234	205	35.6234	205	35.6234	177	35.6234	169	35.6234	199
35.6404	162	35.6404	174	35.6404	180	35.6404	165	35.6404	163	35.6404	172	35.6404	168	35.6404	171	35.6404	195	35.6404	195	35.6404	168	35.6404	175	35.6404	189
35.6574	164	35.6574	166	35.6574	157	35.6574	164	35.6574	173	35.6574	165	35.6574	176	35.6574	157	35.6574	194	35.6574	194	35.6574	173	35.6574	181	35.6574	207
35.6744	167	35.6744	150	35.6744	154	35.6744	174	35.6744	185	35.6744	166	35.6744	160	35.6744	173	35.6744	198	35.6744	198	35.6744	183	35.6744	199	35.6744	205
35.6914	167	35.6914	164	35.6914	167	35.6914	165	35.6914	176	35.6914	156	35.6914	158	35.6914	168	35.6914	194	35.6914	194	35.6914	199	35.6914	202	35.6914	197
[truncated: 2,017 more rows]

## Sheet: Identified Phases
Quartz	Intensity	Calcite	Intensity	Muscovite	Intensity	Illite	Intensity	Dolomite	Intensity	HMC	Intensity	Anorthite	Intensity
Angle [2θ]	[counts]	Angle [2θ]	[counts]	Angle [2θ]	[counts]	Angle [2θ]	[counts]	Angle [2θ]	[counts]	Angle [2θ]	[counts]	Angle [2θ]	[counts]
20.87	19.93	23.07	8.1	8.84	77.46	8.82	57.21	22.04	1.3	23.31	7.6	13.67	8.51
26.65	69.9	29.42	100	17.74	35.7	17.7	35.02	24.07	5.33	29.75	100	15.23	1.46
26.65	30.1	31.46	2.43	19.67	6.31	19.69	6.65	30.97	100	31.84	2.39	18.92	8.02
36.56	7.13	36	13.71	19.78	39.95	19.72	26.97	33.56	4.33	36.37	13.78	22	78.58
39.49	1.01	39.44	20.16	19.89	98.46	19.84	100	35.34	4.73	39.86	18.73	22.78	17.17
39.49	6.18	43.19	14.26	20.17	12.15	20.19	23.41	37.38	11.38	43.65	13.49	23.66	40.45
40.31	3.19	47.15	6.16	20.66	26.28	20.58	10.88	41.15	7.59	47.67	6.19	23.67	25.87
42.47	5.25	47.54	19.67	21.6	21.02	20.92	3.06	41.15	19.64	48.12	18.26	24.48	34.9
45.81	1	48.54	20.02	22.41	12.27	21.61	13.24	43.81	3.77	49.1	18.54	24.58	13.52
45.81	2.09	56.61	3.73	22.9	66.26	22.33	13.53	44.95	14.59	57.22	2.88	25.47	1.37
50.17	12.58	57.44	9.18	23.81	71.16	22.85	31.08	49.3	5.13	58.07	8.24	25.66	13.34
54.9	3.09	60.72	5.28	24.86	4.75	23.81	38.42	50.57	17.77	61.4	5.23	26.03	5.14
55.37	1.61	61.05	2.41	25.48	90.63	24.77	10.25	51.1	14.84	61.78	2.39	26.49	25.43
59.98	4.11	61.43	3.18	26.6	59.97	25.44	65.45	51.1	7.73	62.18	2.34	27.53	54.38
59.98	4.94	63.1	2.29	26.74	68.3	26.59	49.14	51.33	1.19	63.83	1.64	27.79	59.79
64.08	1.72	64.71	6.84	27.85	85.29	26.68	53.87	58.92	2.13	65.43	5.87	27.87	95.41
67.78	1.38	65.67	3.91	28.56	8.52	27.74	71.43	58.92	1.62	66.54	3.13	28.04	100
67.78	4.18	69.24	1.51	29.84	88.98	28.52	33.96	59.84	6.85	71.19	1.8	28.49	43.09
68.19	1.36	70.3	2.13	31.22	56.26	29.82	54.28	59.84	2.67	73.85	2.61	29.49	23.64
68.19	5.31	72.95	2.69	32.01	45.45	31.11	33.04	63.46	4.11	78.26	1.89	30.28	27.07
68.34	4.13	77.23	1.93	34.48	5.23	31.96	24.83	63.46	2.88	82.67	1.84	30.45	17.62
73.53	1.73	81.6	2.24	34.55	43.03	34.47	3.24	64.54	3.01	84.88	1.23	30.73	10.77
75.7	1.91	83.84	1.57	34.69	22.15	34.52	14.99	65.2	1.21			31.56	24.5
79.93	2.3			34.9	13.9	34.54	38.95	65.2	2.26			31.79	8.69
81.24	2.41			34.95	55.63	34.78	11.52	66.1	2.17			33.8	14.6
				35.02	100	34.8	48.16	67.42	8.45			35.24	3.29
				35.74	8.53	34.99	57.37	70.55	3.78			35.55	5.13
				35.92	9.34	35.69	5.66	72.91	1.63			35.66	4.08
				36.44	25.12	35.84	8.83	74.75	2.94			35.68	30.5
				36.76	12.68	36.43	10.43	77.03	2.98			35.77	20.11
				37.24	4.37	36.57	8.98	82.66	1.94			35.9	1.49
				37.51	14.78	37.2	5.15	86.69	1.02			36.47	2.22
				37.76	38.82	37.38	24.26	86.69	1.27			36.81	3.62
				39.95	1.47	37.71	30.65	87.93	1.61			37.15	4.28
				40.04	10.58	38.17	3.03					37.23	4.74
				40.19	3.84	38.68	1.7					37.71	3.24
				40.22	4.23	39.91	6.92					37.95	3.74
				40.4	8.26	39.99	5.3					38.25	3.31
				40.86	10.36	40.25	3.49					39.02	5.89
				40.87	3.09	40.38	3.91					39.49	6.39
				41	7.33	40.66	3.11					39.77	3.17
				41.32	11.33	40.71	2.12					39.99	1.73
				42	20.23	41.03	1.2					40.43	4.47
				42.03	3.37	41.2	12.63					40.54	2.55
				42.28	4.47	41.22	2.27					41.35	1.64
				42.4	42.77	41.87	6.35					41.82	1.47
				43.67	6.68	41.88	7.68					41.86	2.34
				44.02	10.83	42.31	1.38					42.18	1.17
				44.54	4.01	42.33	24.23					42.23	9.72
				45.34	34.57	42.78	2.29					42.42	13.69
				45.74	1.16	43.5	7.88					43.06	8.99
				45.98	23.46	43.78	1.02					43.24	1.93
				46.56	12.56	44.04	4.94					43.31	1.46
				46.78	2.95	45.24	26.1					44.82	1.3
				47.99	1.69	45.95	13.54					44.86	2.55
				48.51	1.81	46.2	1.93					45	3.4
				48.73	3.16	46.34	5.27					45.2	1.04
				49.26	1.86	46.68	4.86					45.37	1.74
				49.86	1.15	48.01	1.04					45.53	2.22
				51.61	1.31	48.08	3.21					45.68	4.78
				52.35	3.92	48.42	2.45					46.18	1.73
				52.63	1.34	48.73	4.8					46.53	3.14
				52.81	13.99	49.22	1.15					46.84	1.07
				53.48	5.24	52.25	2.76					47.12	3.32
				53.78	1.16	52.76	4.3					47.2	10.29
				53.83	1.17	53.23	7.16					48.4	5.17
				53.92	4	53.8	5.85					48.43	7.76
				54.13	1.63	53.83	1.72					48.45	1.12
				54.16	1.17	53.89	2.78					49.09	1.47
				54.57	4.03	54.17	2.36					49.33	11.22
				54.83	2.44	54.34	7.27					49.48	1.22
				55.14	17.53	54.36	2.28					49.61	3.58
				55.41	6.44	54.58	1.74					49.7	14.36
				55.75	35.13	54.76	1.74					49.72	2.91
				55.95	5.02	54.95	1.39					49.8	2.5
				55.96	5.71	55.03	15.84					50.18	5.16
				56.14	2.41	55.3	1.37					50.39	3.45
				56.45	10.83	55.32	1.44					50.79	9.17
				56.75	2.34	55.5	1.96					50.84	2.51
				56.91	9.35	55.63	23.47					51.29	1.15
				57.45	4.33	55.67	1.73					51.34	1.17
				57.47	7.11	55.89	1.5					51.57	23.4
				57.54	3.25	56.48	9.41					52.14	6.01
				57.72	4.65	56.63	2.75					52.31	1.88
				58.65	3.1	56.69	4.26					52.4	1.51
				59.08	1.08	57.15	5.25					52.4	1.45
				59.12	2.73	57.15	2.13					52.42	1.61
				59.32	7.88	57.4	1.08					52.74	3.33
				59.36	5.4	57.71	3.4					52.9	1.35
				59.67	2.26	58.44	3.94					52.98	1.17
				60.14	4.28	59.01	6.41					53.19	3.33
				60.56	2.2	59.02	1.6					53.26	3.03
				60.64	19.14	59.29	4.56					53.44	2.08
				60.96	1.97	60.16	2.22					53.53	6.13
				61.38	7.91	60.58	7.92					53.66	3.61
				61.65	19.86	61.11	5.86					54.24	1.78
				61.78	41.78	61.56	25.31					54.55	3.94
				61.85	1.99	61.71	14.14					54.89	1.44
				61.96	3.03	61.91	1.32					55.61	3.5
				62	1.05	61.93	1.54					56.28	1.13
				62.42	1.93	62.22	1.87					56.49	1.5
				62.42	1.23	62.44	1.21					56.67	1.6
				62.68	2.42	62.48	2.21					56.93	1.25
				62.91	1.14	62.8	1.92					57.15	4.25
				62.99	3.77	62.83	1.2					57.41	2.32
				63.25	1.83	63.79	1.8					58.15	1.19
				63.92	3.45	63.8	2.76					58.23	1.61
				63.94	4.01	64.54	1.47					58.27	1.39
				64.59	1.22	64.87	1.47					58.79	2.38
				65.13	4.31	65.16	2.75					58.94	1.72
				65.31	2.02	65.66	2.62					59.62	1.31
				65.87	1.69	68.61	1.22					59.96	1.35
				65.96	1.44	69.02	2.11					60.04	3.2
				65.97	1.53	69.28	11.46					60.1	2.17
				66.97	1.83	69.89	7.97					60.11	1.17
				67.05	1.06	70.11	2.31					60.8	1.08
				68.17	1.52	70.73	3.58					60.99	1.19
				68.41	1.12	71.09	3.06					61.2	1.65
				69.29	4.67	71.5	2.49					61.26	1.95
				69.37	21.62	71.97	3.34					62.18	5.34
				70.19	9.97	72.11	1.07					62.23	5.9
				70.19	7.7	72.42	2.5					62.41	1.26
				70.95	1.27	72.58	2.25					62.65	4.11
				71.21	4.96	72.67	3.95					62.7	5.7
				72.1	1.26	72.79	2.43					62.77	1.14
				72.62	2.28	72.83	1.45					62.97	1.54
				72.72	4.67	72.84	7.22					63.16	2.47
				72.8	3.25	72.93	4.93					63.22	1.01
				72.87	10.64	73.47	3.98					63.39	4.15
				73.01	1.54	73.73	2.11					63.96	6.12
				73.1	6.44	74.42	4.58					64.24	3.76
				73.19	5.44	74.56	2.13					64.51	3.68
				73.46	4.86	74.57	2.35					64.69	1.02
				74.06	6.95	75.6	1.06					65.39	2.09
				74.45	5.58	75.74	1.49					65.75	1.44
				74.66	2.44	75.91	1.11					65.87	1.02
				75.01	3.42	75.91	2.33					65.89	3.92
				75.73	1.64	76.16	2.58					65.9	1.58
				76.11	3.89	76.56	3.14					66.28	1.76
				76.14	3.31	76.57	1.27					67.15	2.54
				76.25	2.37	77.69	1.64					67.35	3.59
				76.27	1.16	77.96	1.22					67.57	5.82
				76.45	1.35	78.08	1.07					67.76	2.89
				76.64	4.24	79.75	1.87					68.14	3.87
				76.66	1.11	80.06	1.08					68.3	3.27
				76.73	2.6	80.1	1.2					68.38	1.18
				77.23	1.69	80.55	1.71					68.6	2.72
				77.9	2.74	80.97	1.36					68.67	2.24
				78.05	2.82	81.1	2.02					68.8	4.14
				78.3	3.86	85.28	1.78					69.09	7.25
				78.36	2.91	86.42	1.14					69.52	6.98
				78.7	1.06	87.3	5.07					69.52	5.06
				79.29	2.31	88.03	2.78					69.78	2.07
				79.4	1.63							69.89	1.93
				79.76	1.34							70.14	3.33
				79.85	1.14							70.29	1.2
				80.2	1.58							70.52	1.89
				80.46	1.58							71.06	1.46
				80.5	1.34							71.08	1.63
				80.79	3.3							71.3	1.28
				81.09	1.78							71.36	2.85
				81.37	1.69							71.4	1.24
				81.39	2.25							71.62	1.13
				81.59	1.21							72.38	1.09
				83.6	2.24							72.97	1.78
				85.9	2.8							73.02	3.21
				87.34	7.21							74.1	1.05
				87.65	1.31							74.52	1.2
				88.57	3.83							74.75	1.4
												74.77	1.6
												74.9	1.35
												75.03	1.08
												75.57	4.15
												75.61	2.21
												75.78	3.34
												76.66	2.48
												76.9	1.48
												77.01	1.07
												77.26	2.05
												77.86	1.04
												78.16	3.84
												78.33	1.34
												78.79	4.38
												79.24	1.99
												80.53	1.27
												81.91	1.2
												82.51	1.58
												82.57	1.15
												82.79	2.06
												83.49	2.75
												83.72	2.36
												84.4	1.35
												84.7	2.32
												85.41	1.36
												86.11	1.46
												86.2	2.18
												86.27	1.46
												89.53	1.02

## Sheet:  Peak References
Mineral	Reference
Quartz	Levien, L., Prewitt, C.T. and Weidner, D. J.: Structure and elastic properties of quartz at pressure, American Mineralogist, 65, 1980
Calcite	Graf, D. L.: Crystallographic tables for the rhombohedral carbonates, American Mineralogist, 46, 1961
Muscovite	Richardson, S. M. and Richardson, J. M.: Crystal structure of a pink muscovite from Archer´s Post, Kenya: Implications for reverse pleochroism in dioctahedral micas, American Mineralogist, 67, 1982
Illite	Gualtieri, A.F.: Accuracy of XRPD QPA using the combined Rietveld-RIR method, Journal of Applied Crystallography, 33, 2000.
Dolomite	Beran A. and Zemann, J.: Refinement and comparison of the crystal structures of a dolomite and of an Fe-rich ankerite, Tschermaks Mineralogische und Petrographische Mitteilungen, 24, 1977
HMC	Althoff, P.L.: Structural refinements of dolomite and a magnesian calcite and implications for dolomite formation in the marine environment, American Mineralogist, 62, 1977
Anorthite	Wenk, H.R., Joswig, W., Tagai, T., Korekawa, M. and Smith, B. K.: The average structure of An 62-66 labradorite, American Mineralogist, 65, 1980
