# Supplementary material for: Authigenic formation of Ca–Mg carbonates in the shallow alkaline Lake Neusiedl, Austria
Source: Copernicus journal article supplement (doi:10.5194/bg-17-2085-2020), 2020-04-16
Supplement: Supplementary file 1 [file bg-17-2085-2020-supplement.zip › Supplementary data/Sample Codes.xlsx]

## Sheet: Tabelle1
Sample Code	Explanation	lat	lon	elevation [mNN]
LN-K01	Lake Neusiedl "Kern" 01	47.8036	16.7093	110
LN-K02	Lake Neusiedl "Kern" 02	47.8036	16.7093	110
LN-K03	Lake Neusiedl "Kern" 03	47.8036	16.7093	110
LN-K04	Lake Neusiedl "Kern" 04	47.8036	16.7093	110
LNS	Lake Neusiedl "Seewasser"	47.8036	16.7093	110
