# Supplementary figures and images for: Authigenic formation of Ca–Mg carbonates in the shallow alkaline Lake Neusiedl, Austria
Source: Copernicus journal article supplement (doi:10.5194/bg-17-2085-2020), 2020-04-16

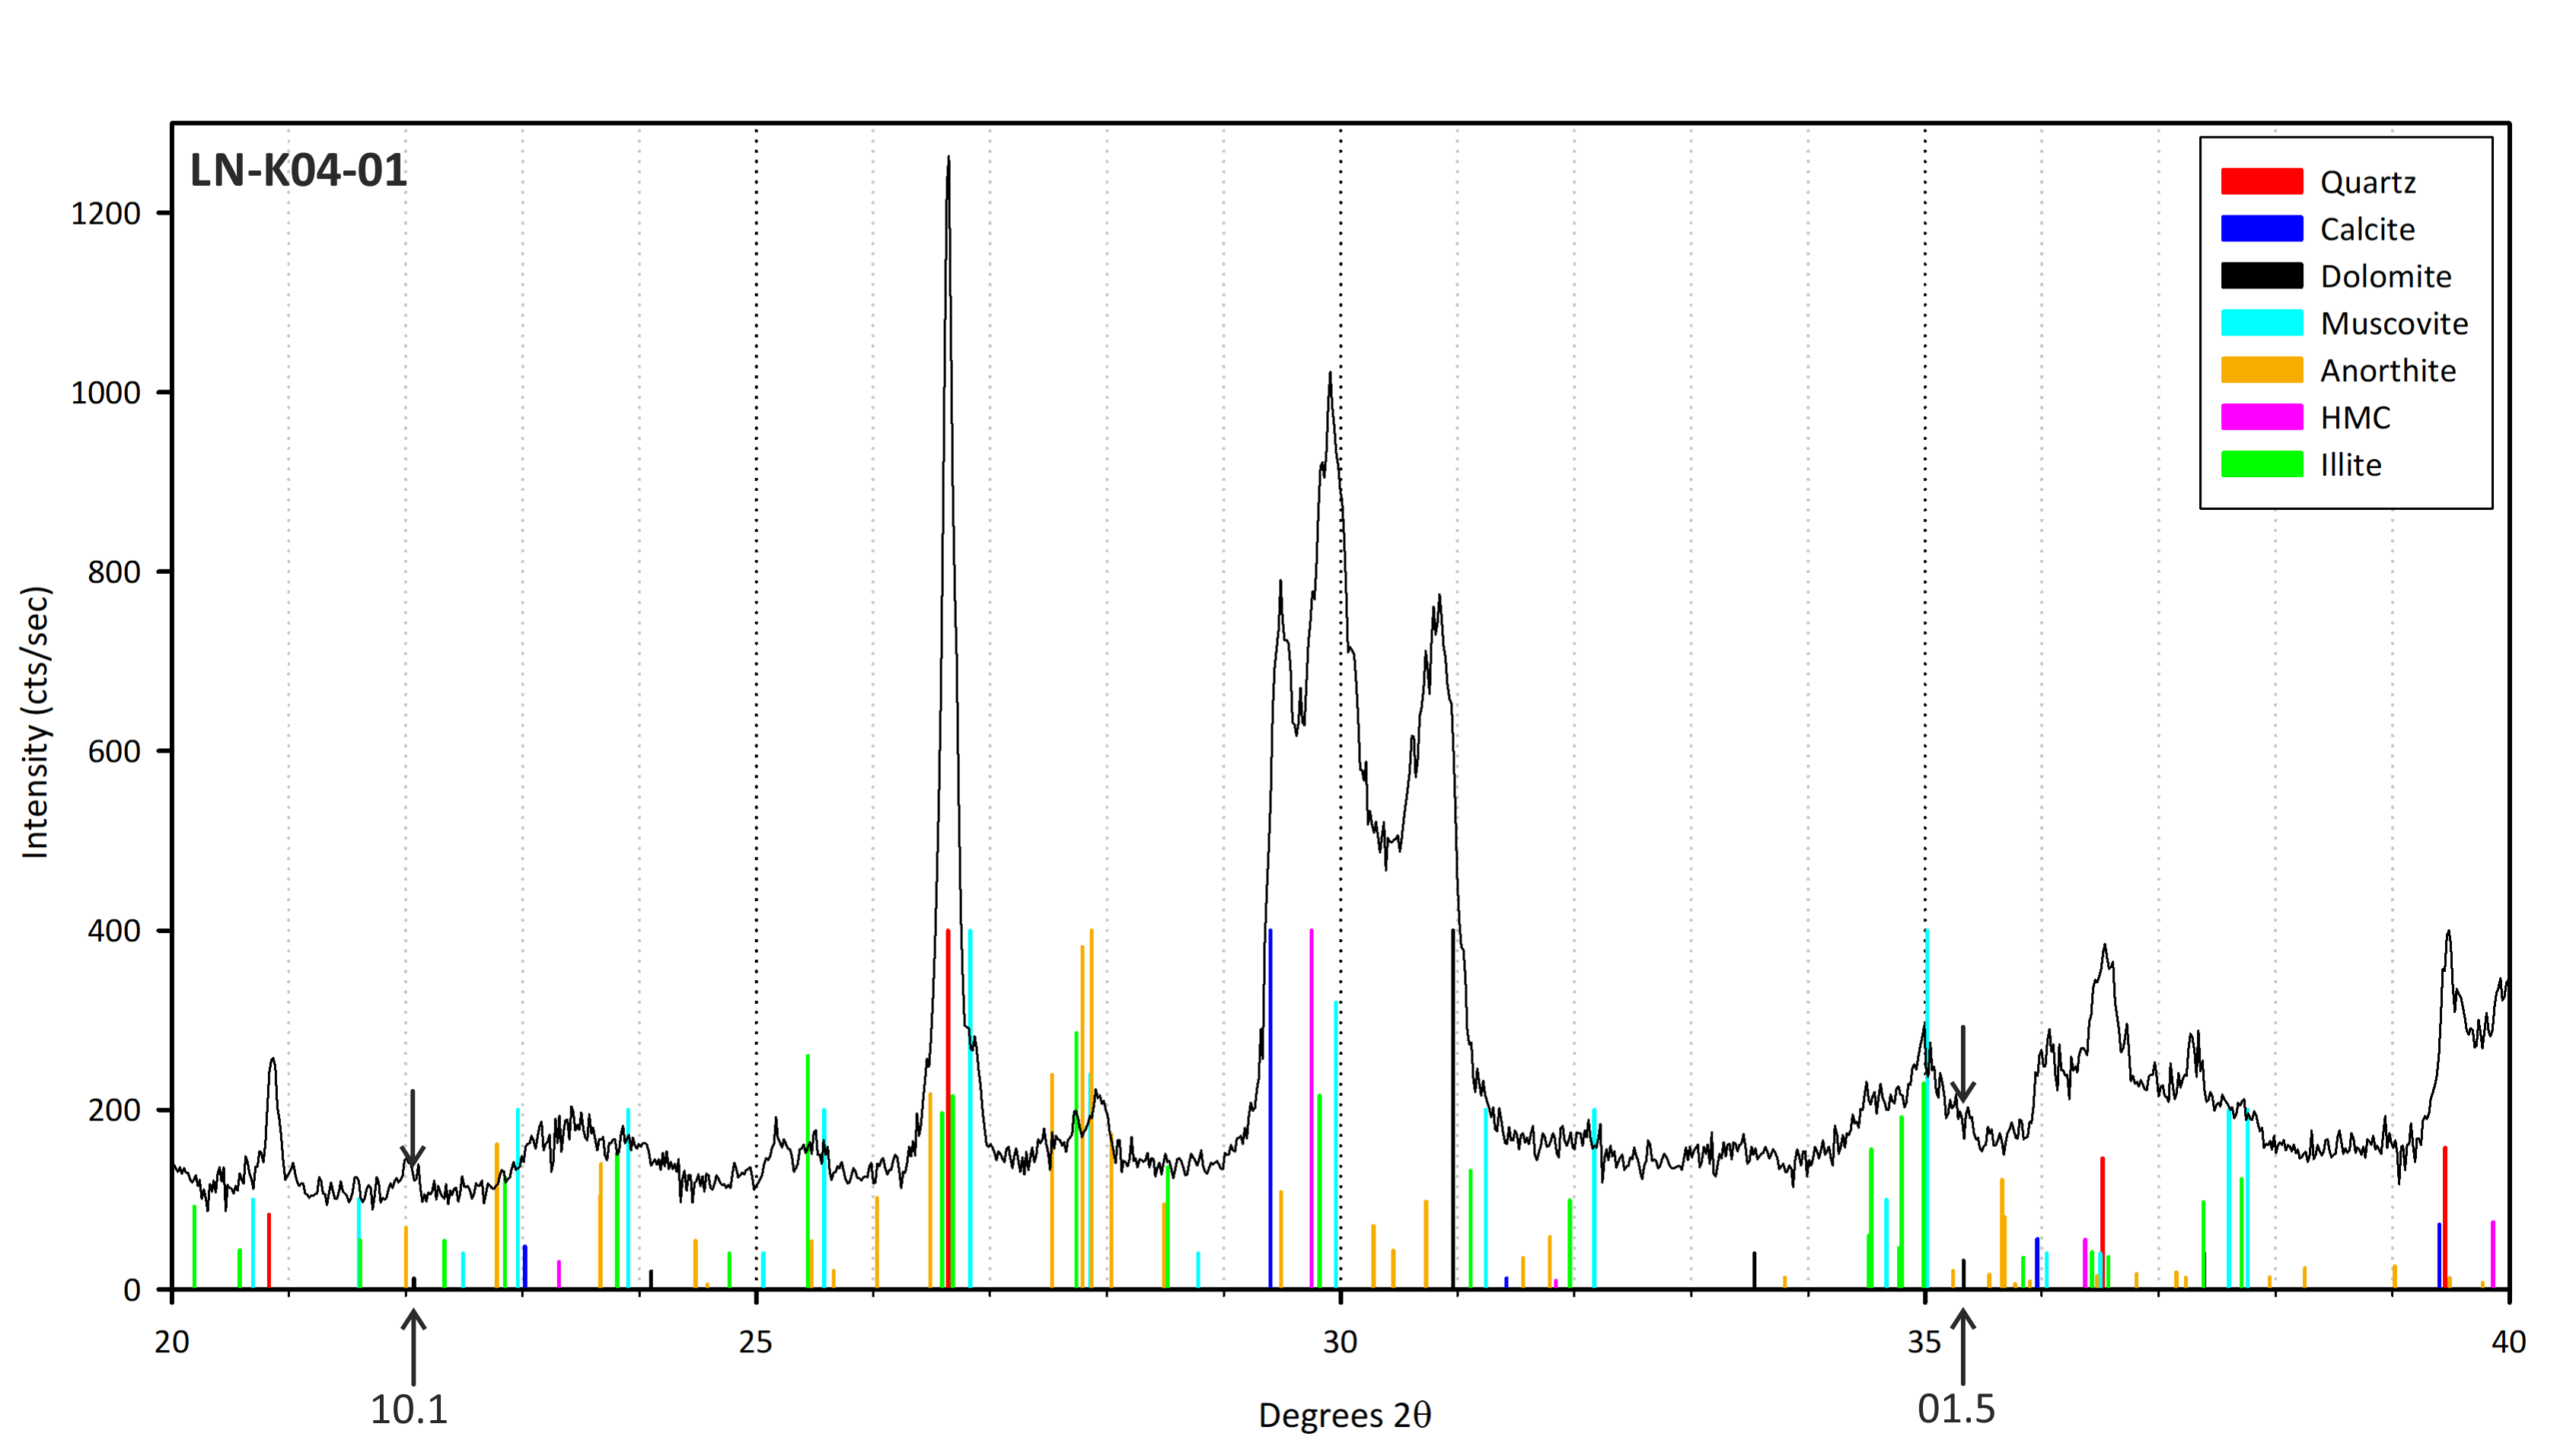

Supplement: Supplementary file 1 [file bg-17-2085-2020-supplement.zip › Supplementary data/Figure S8.png]

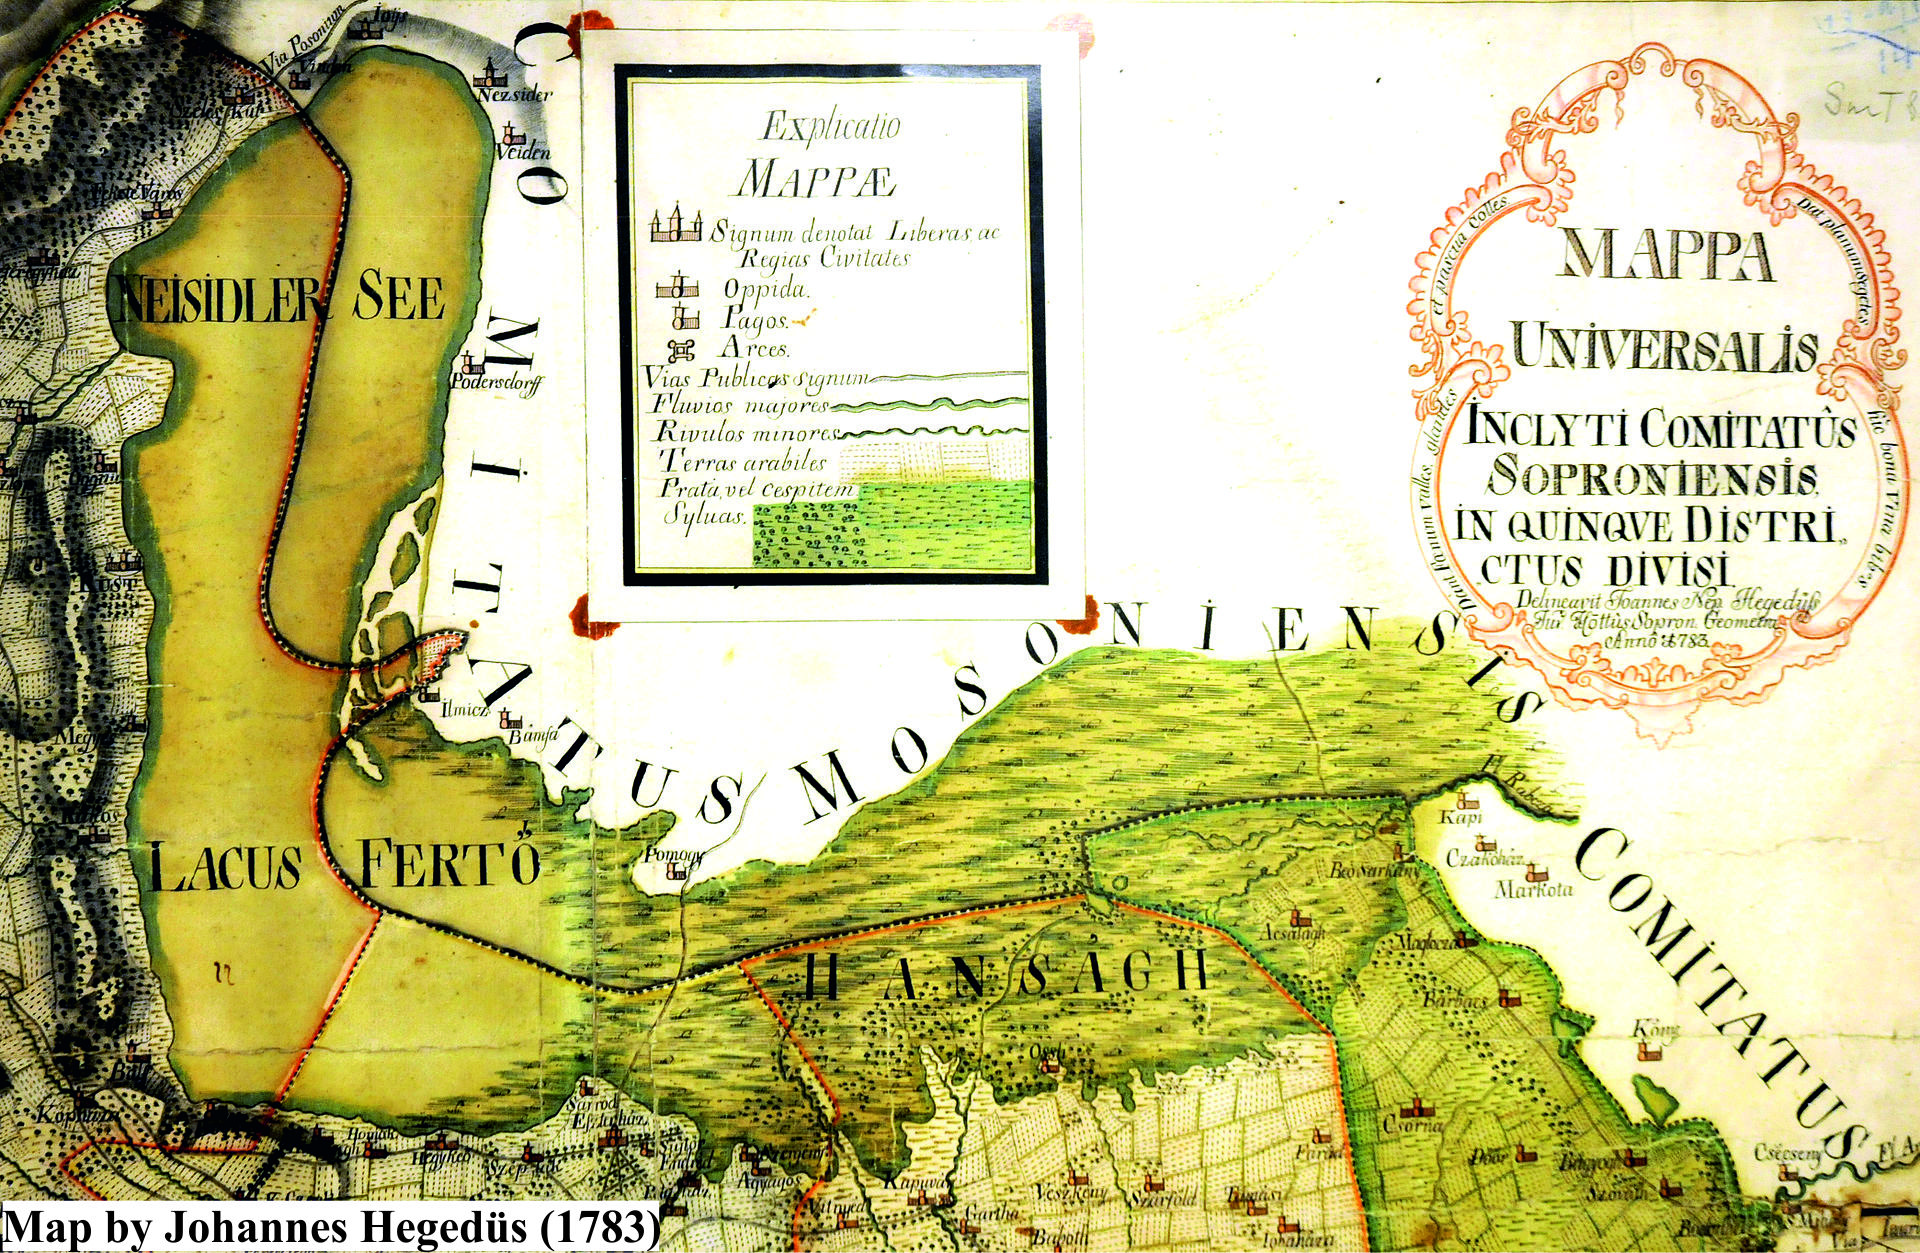

Supplement: Supplementary file 1 [file bg-17-2085-2020-supplement.zip › Supplementary data/Figure S7.jpg]
